# Supplementary material
Source: ML conference proceedings conference paper supplement (https://openreview.net/forum?id=nExUJBF5tR)

Someone is holding a phone while watching a video on it.

Step 40

FP32

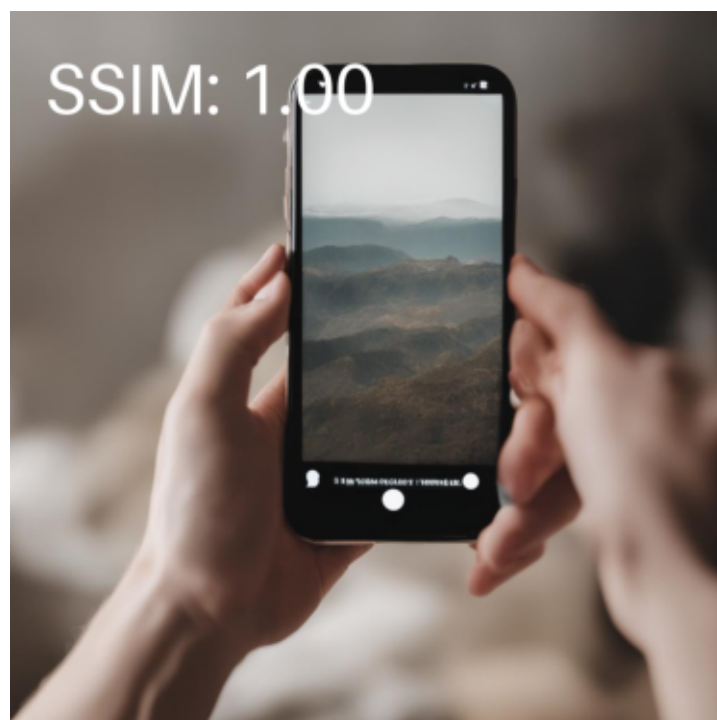

M4E3

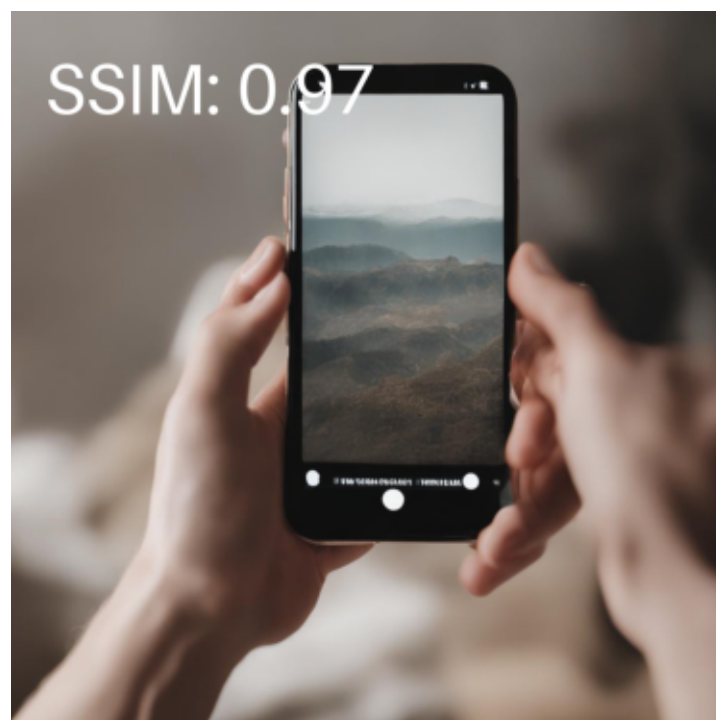

+SR

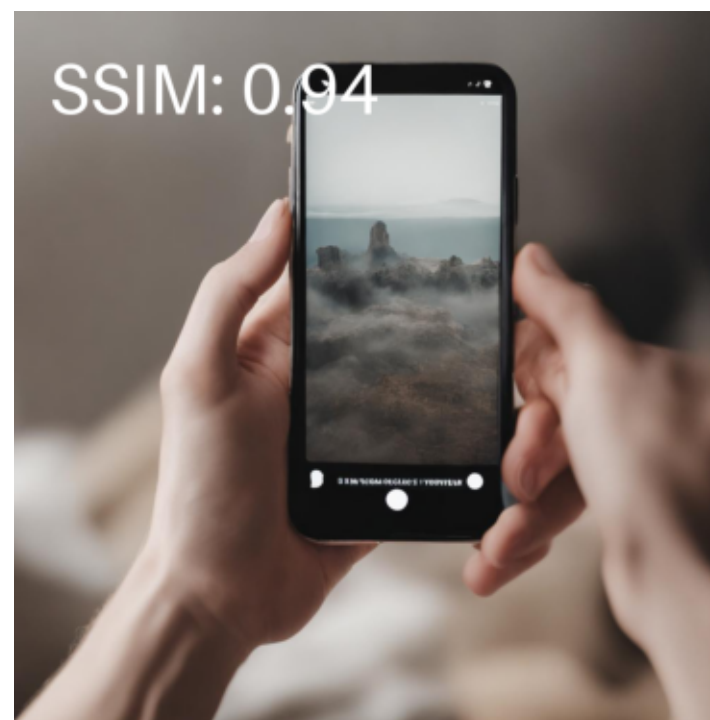

+WSR(p=4)

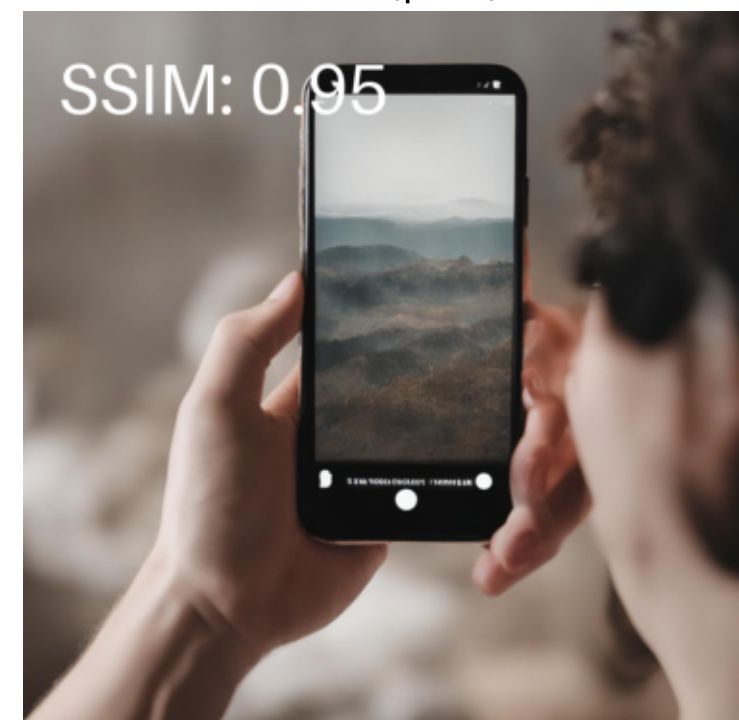

Step 100

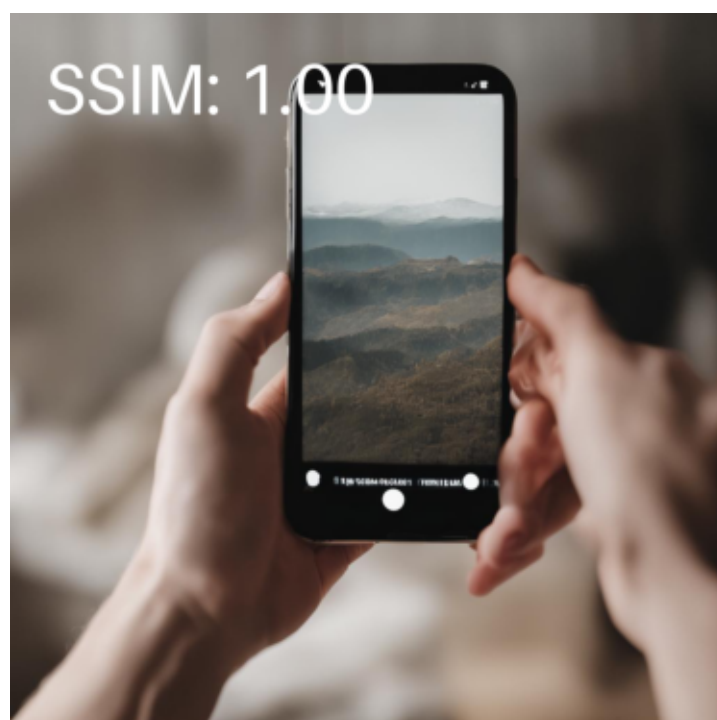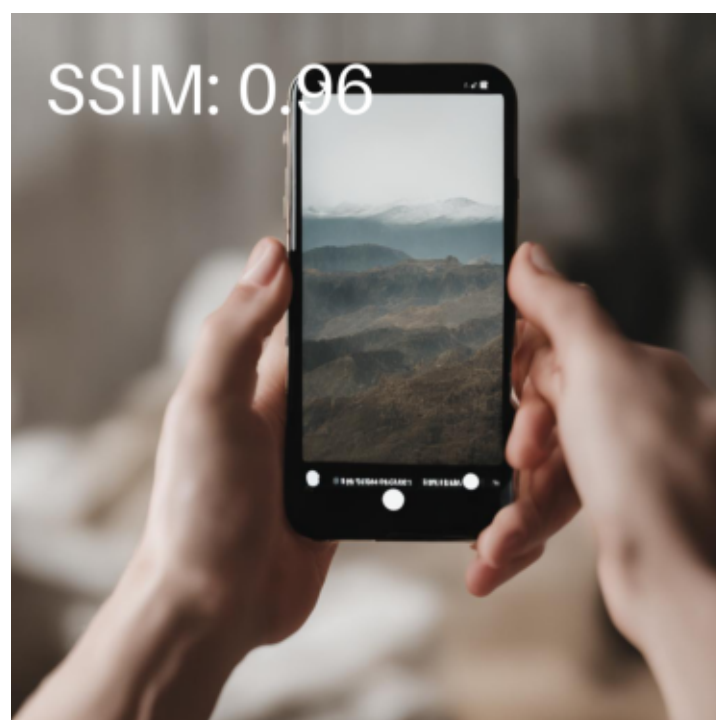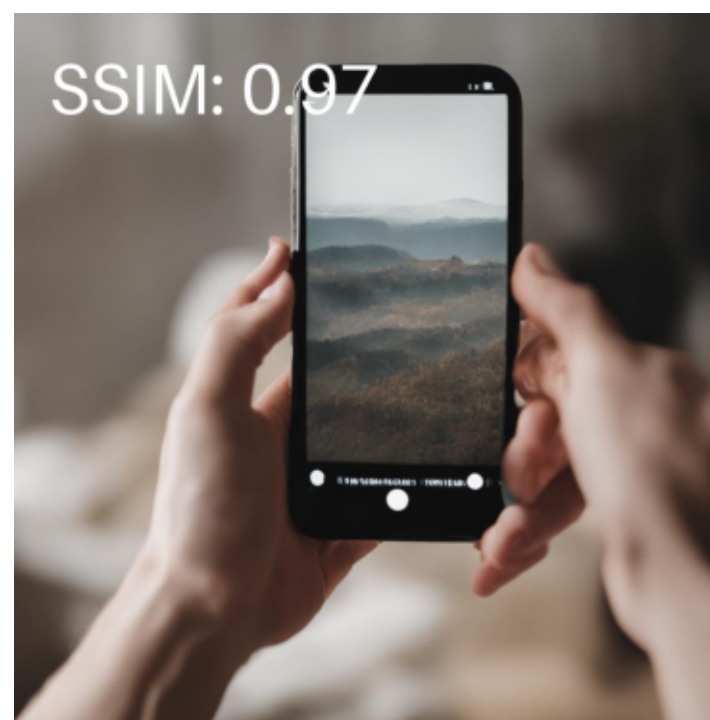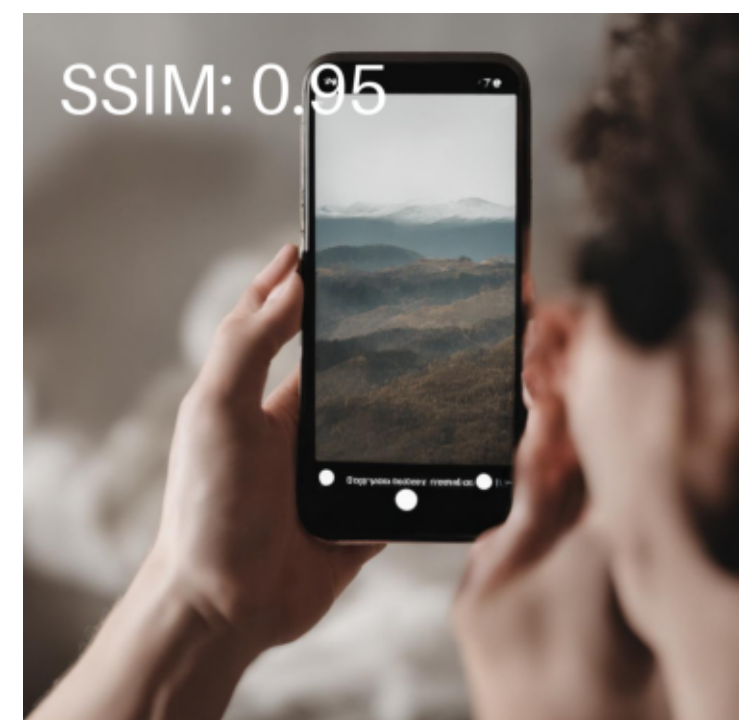

Step 200

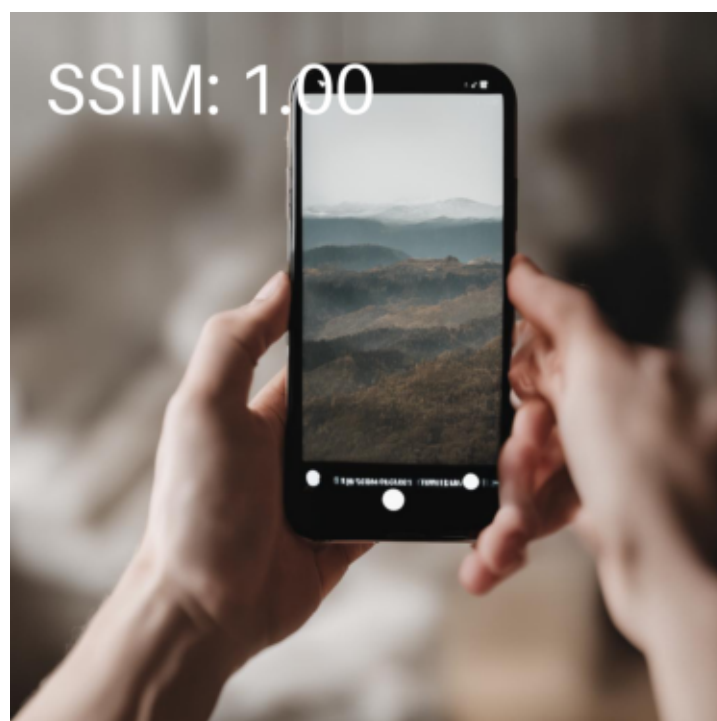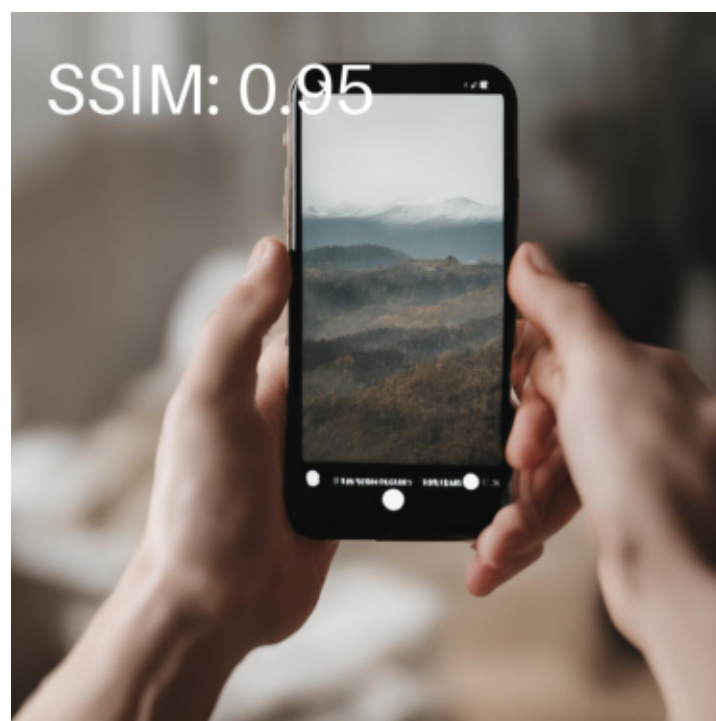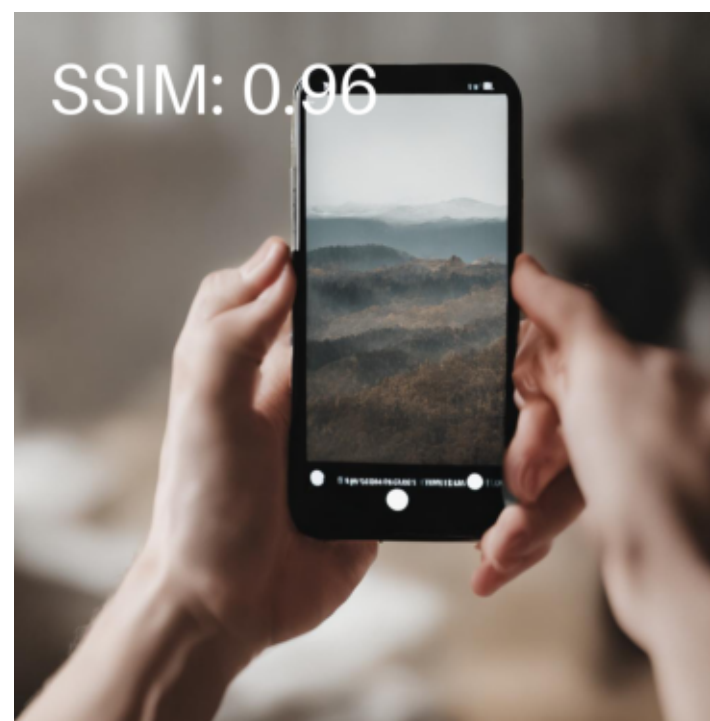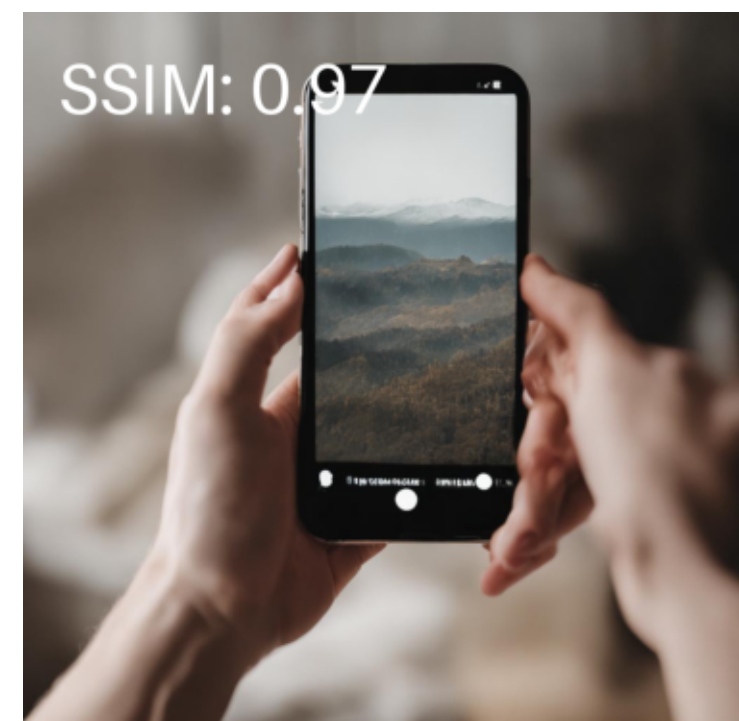



so many people using laptops at a meeting

FP32

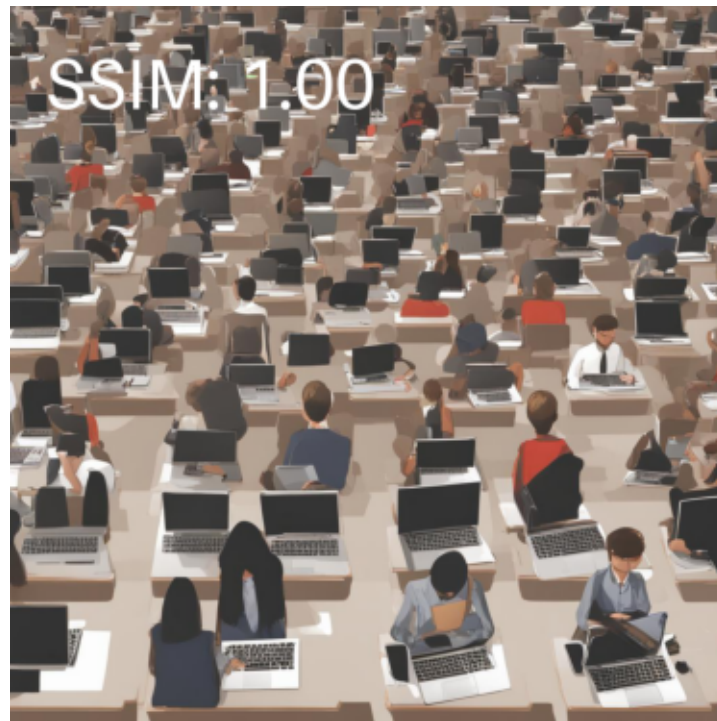

M4E3

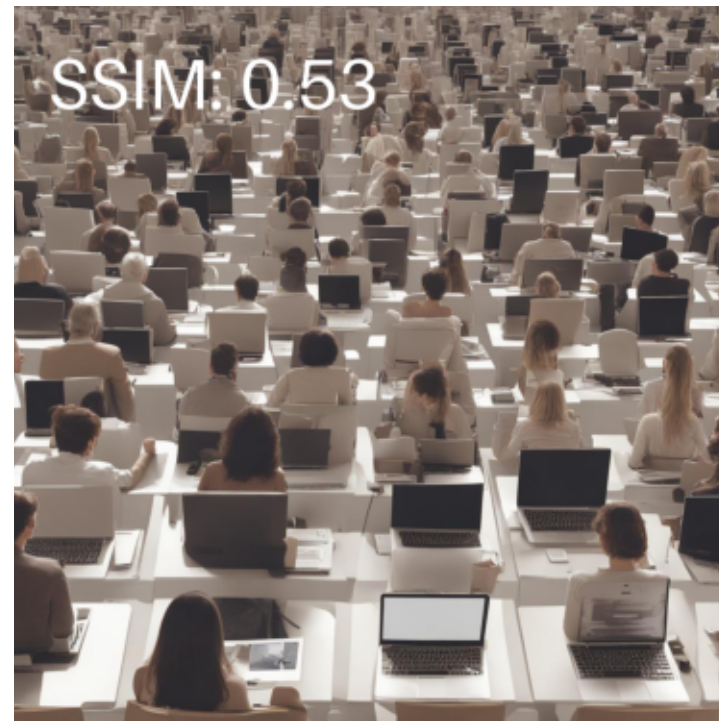

+SR

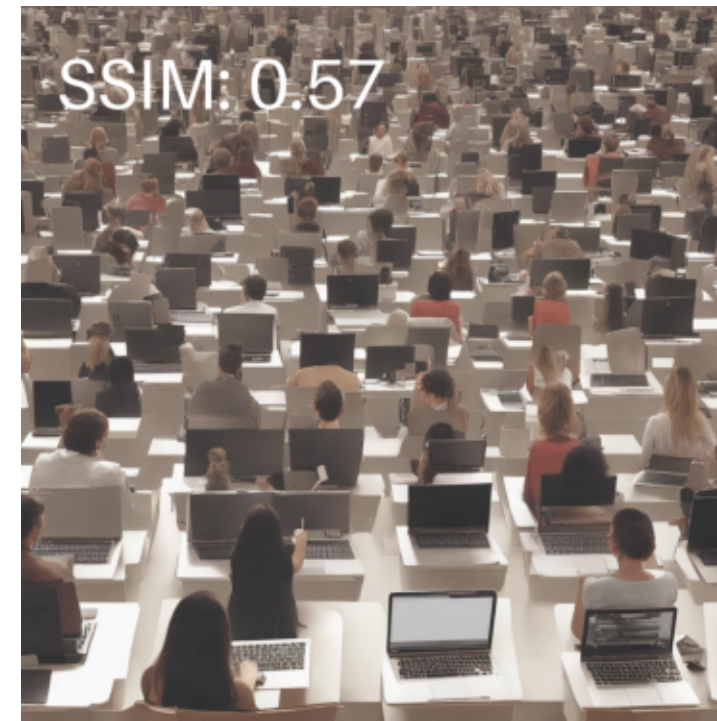

+WSR(p=4)

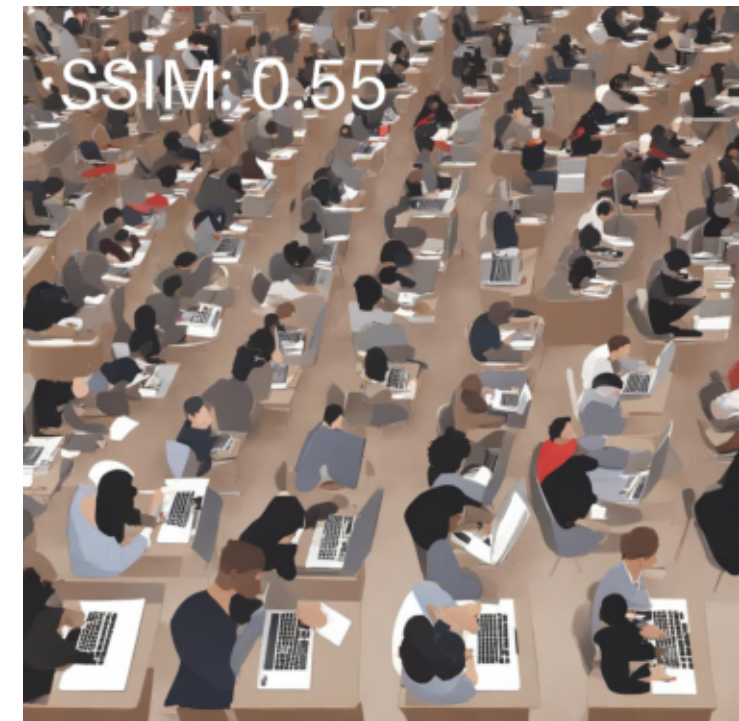

Step 40

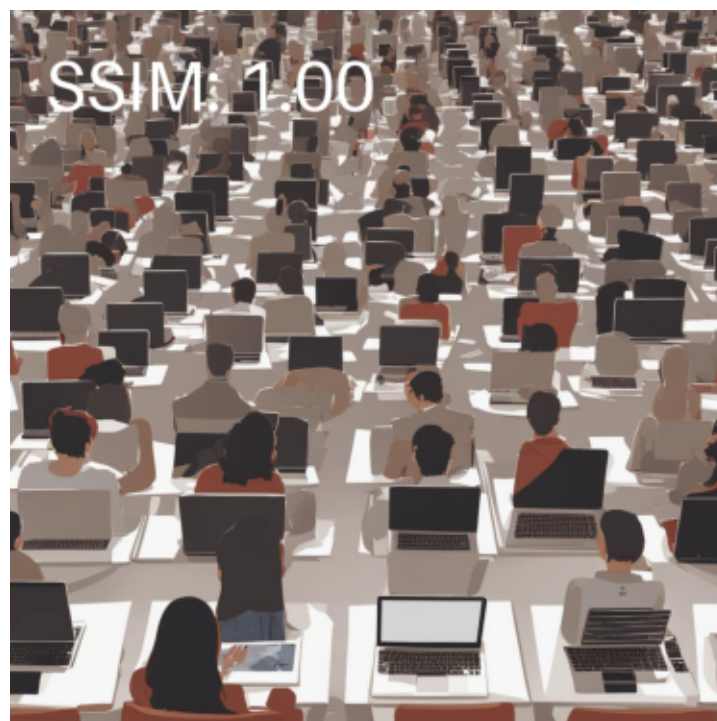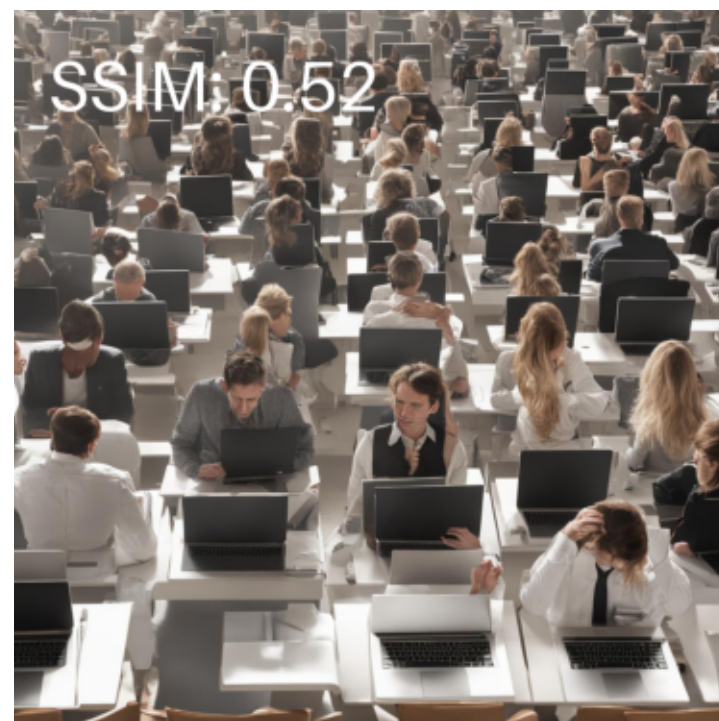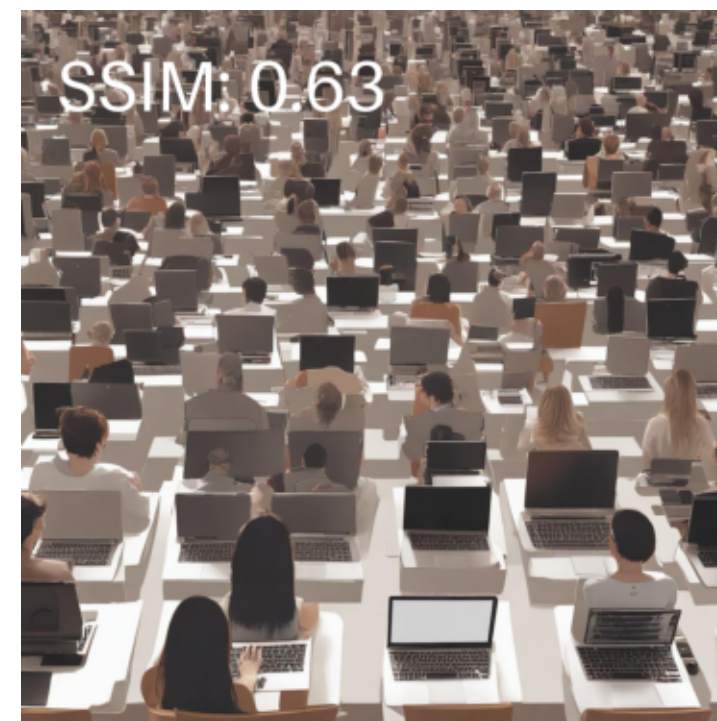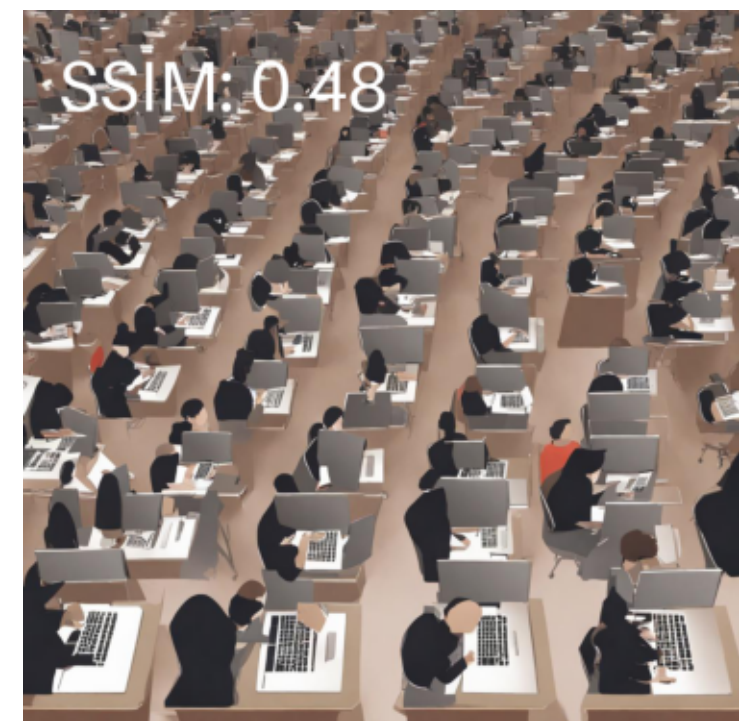

Step 100

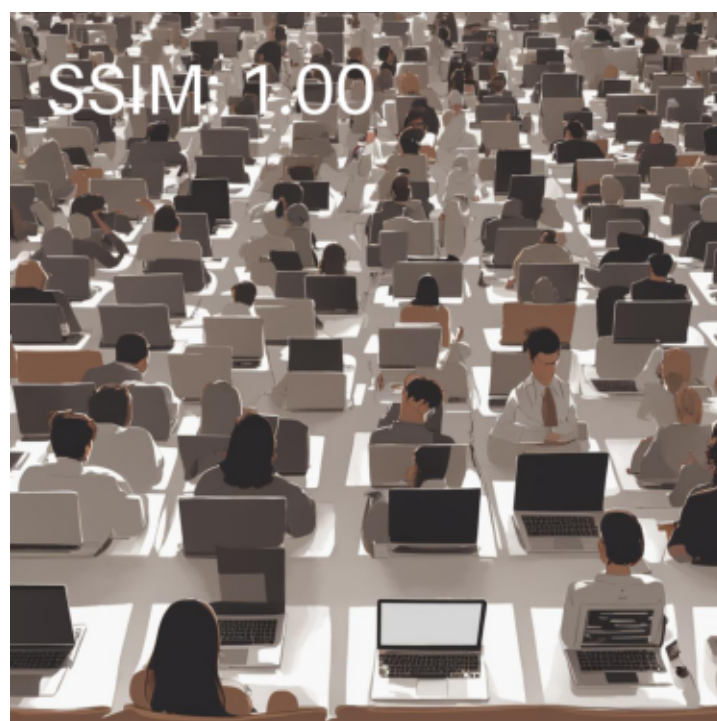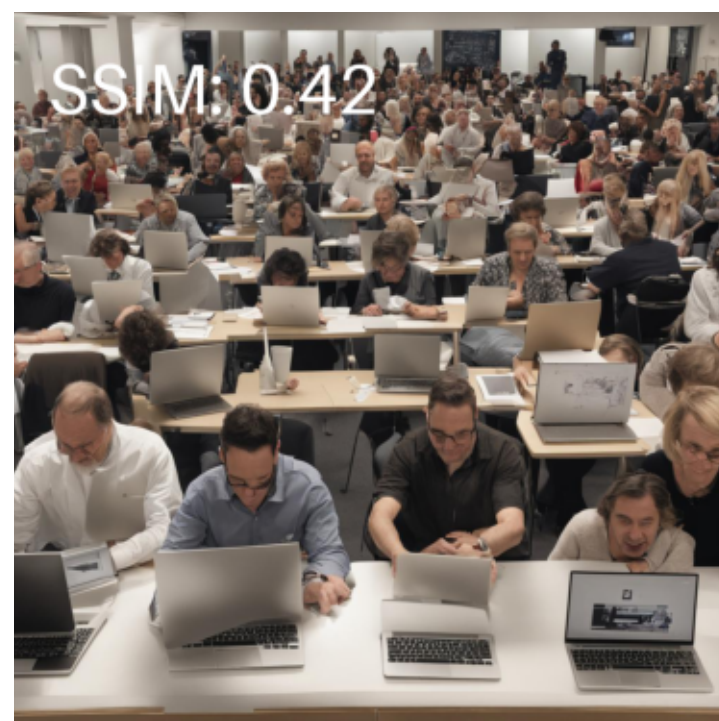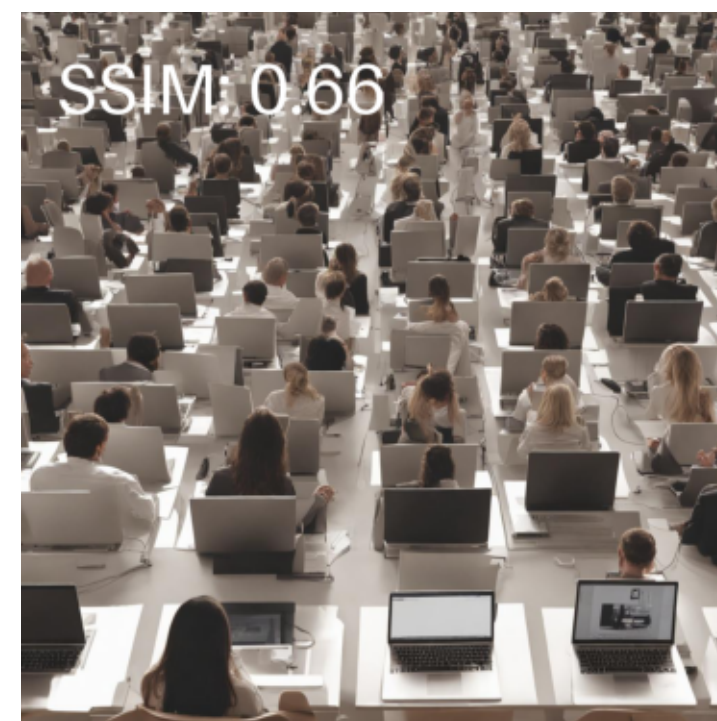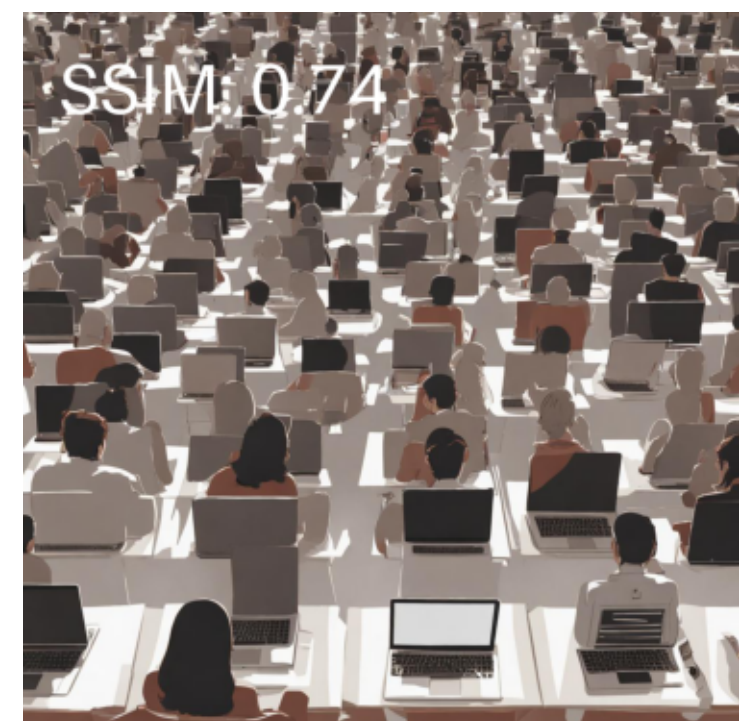

Step 200



this is a very dark picture of a room with a shelf

Step 40

FP32

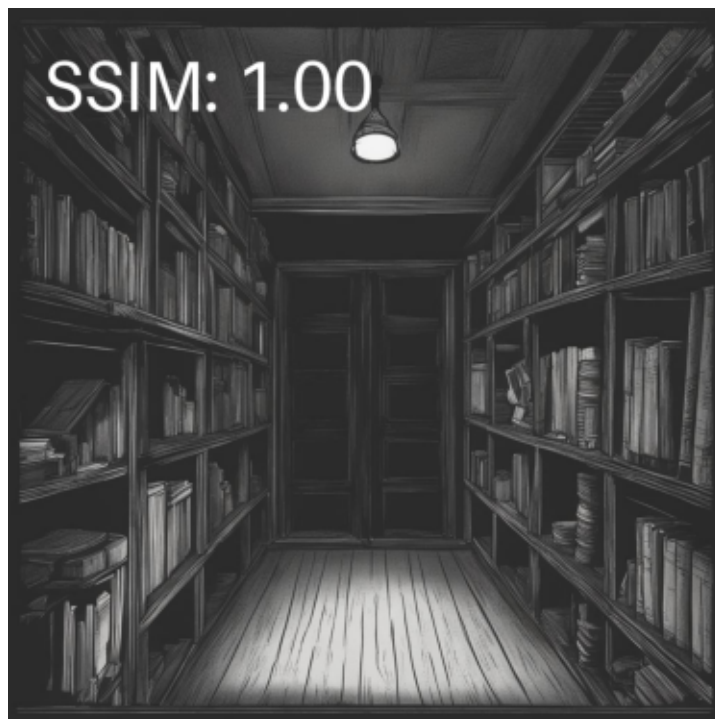

M4E3

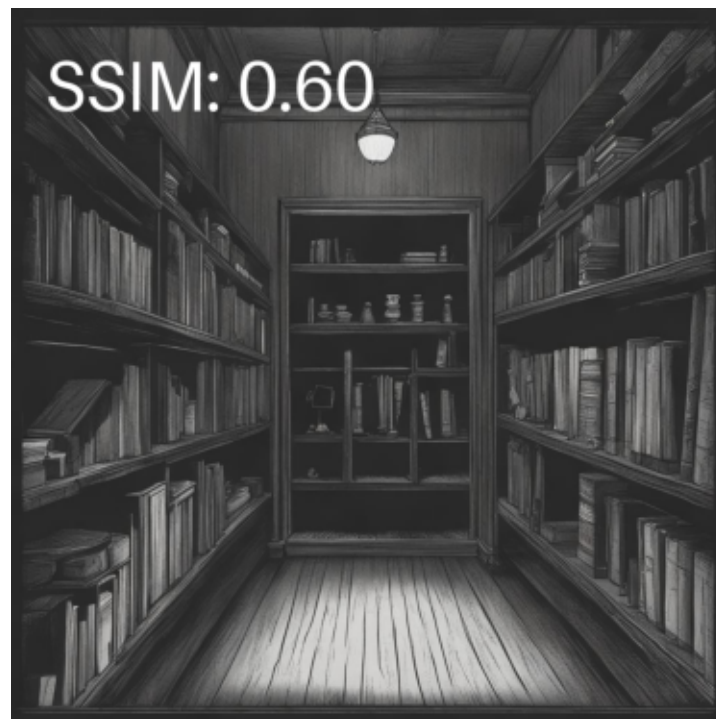

+SR

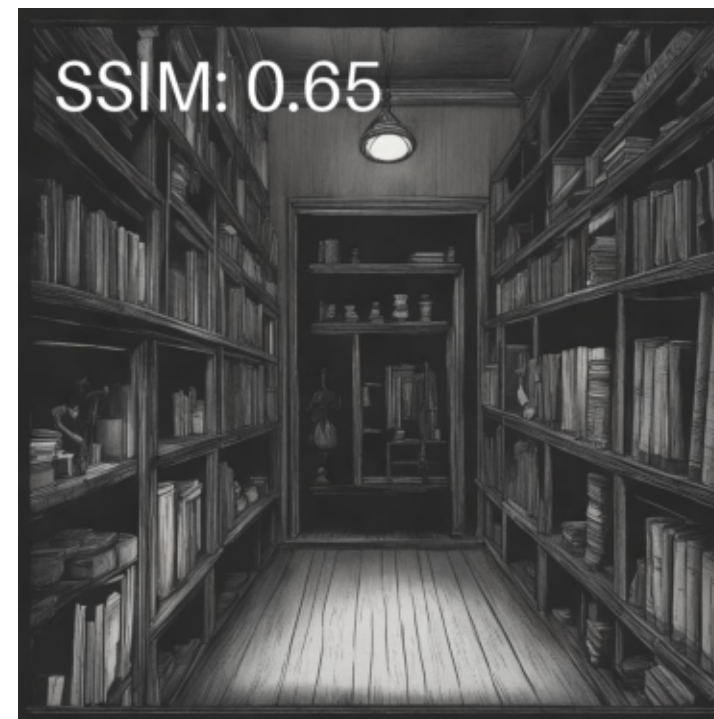

+WSR(p=4)

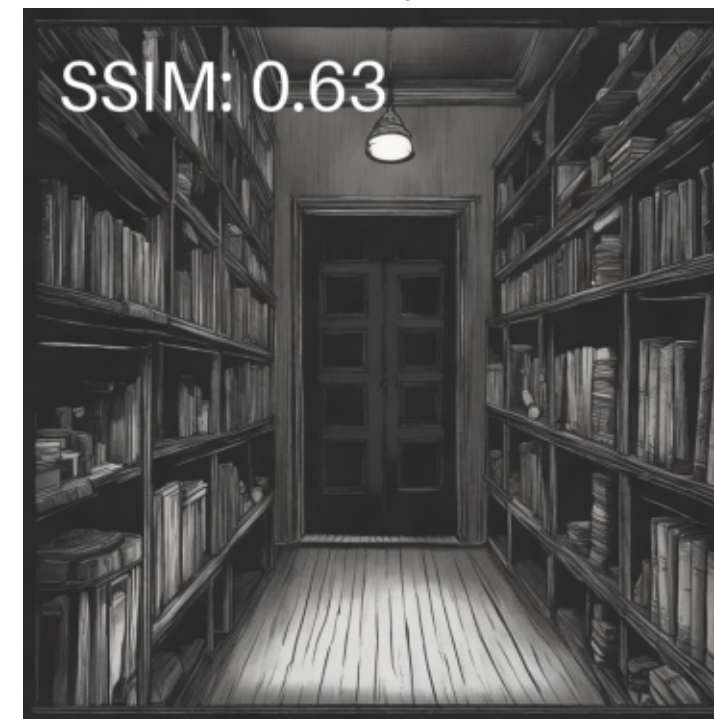

Step 100

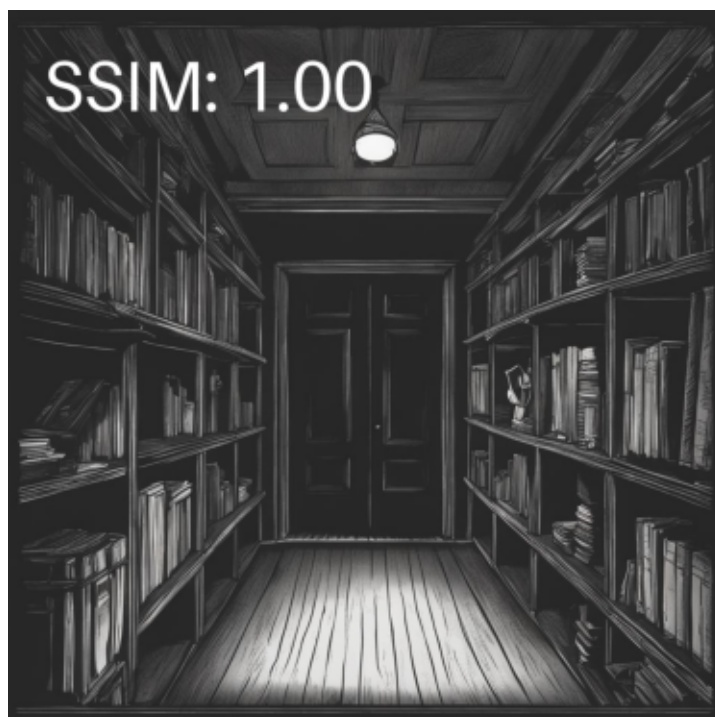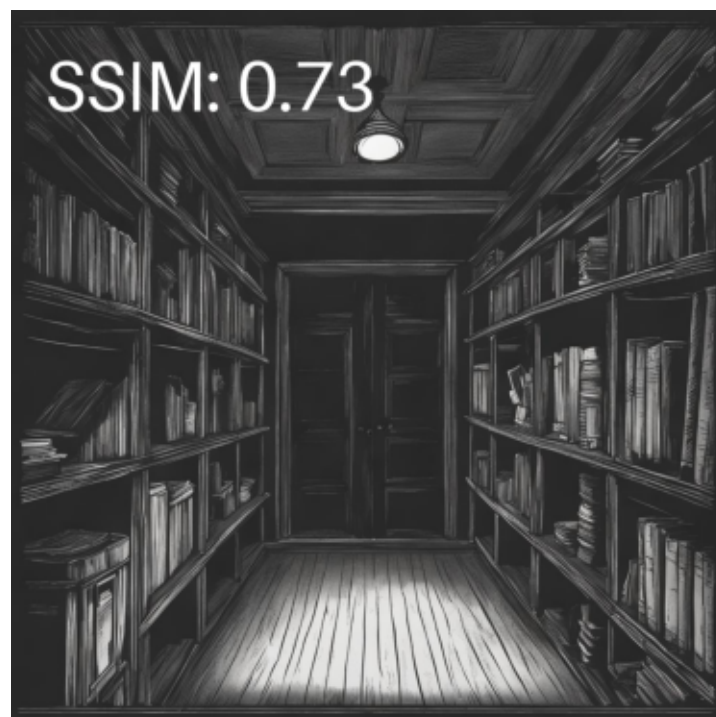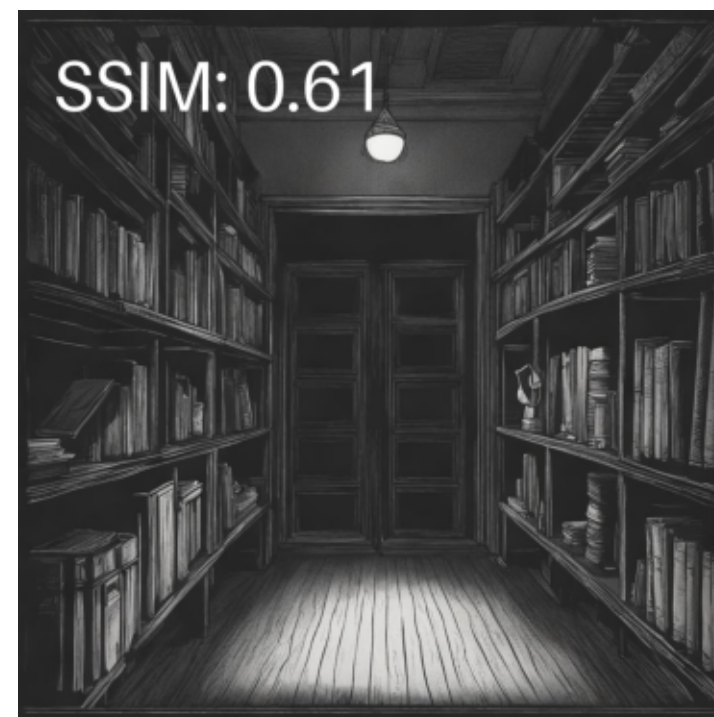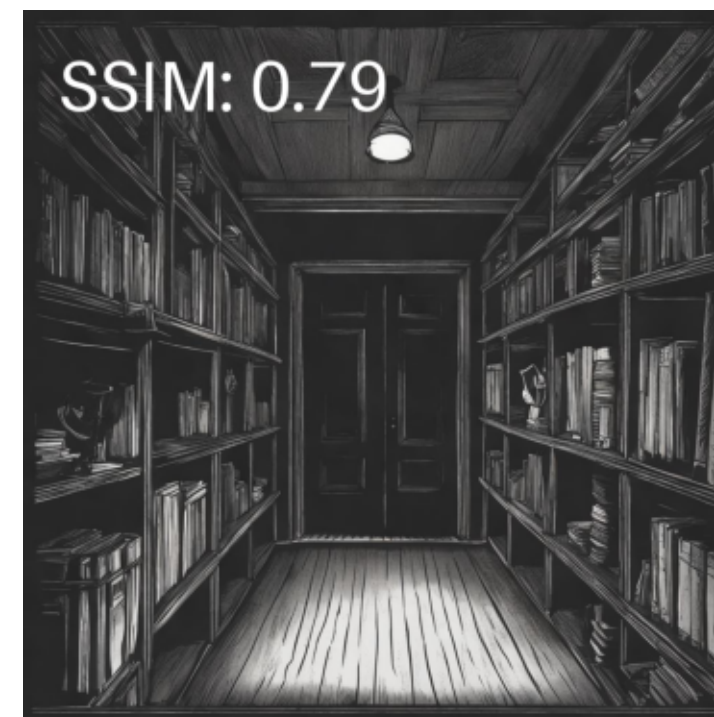

Step 200

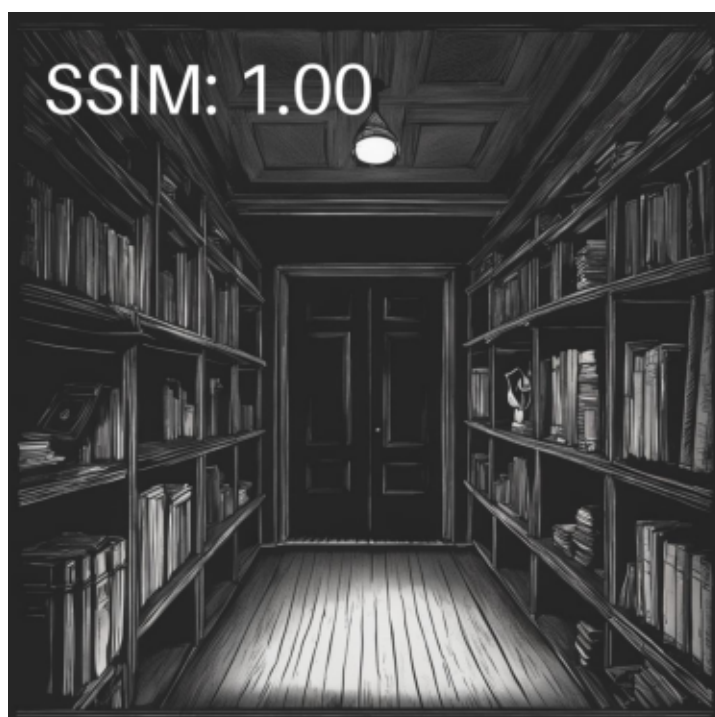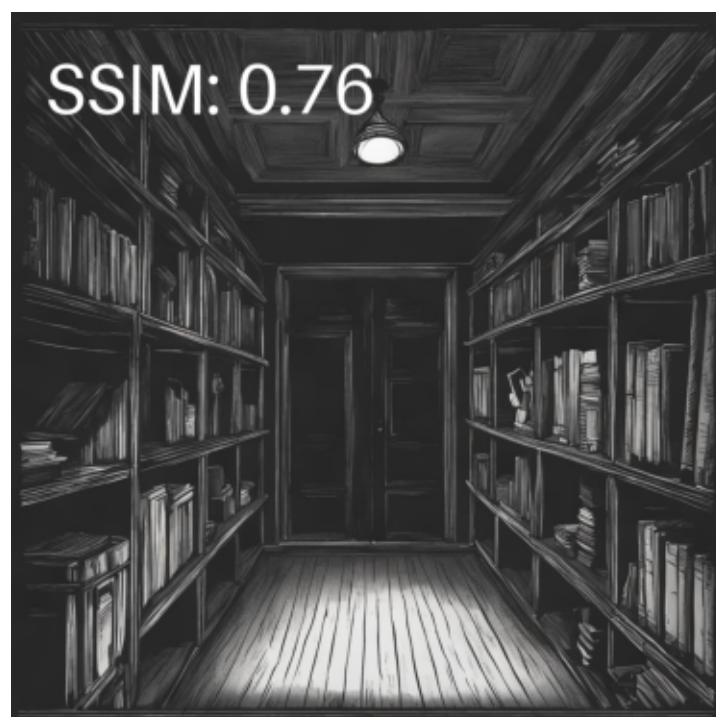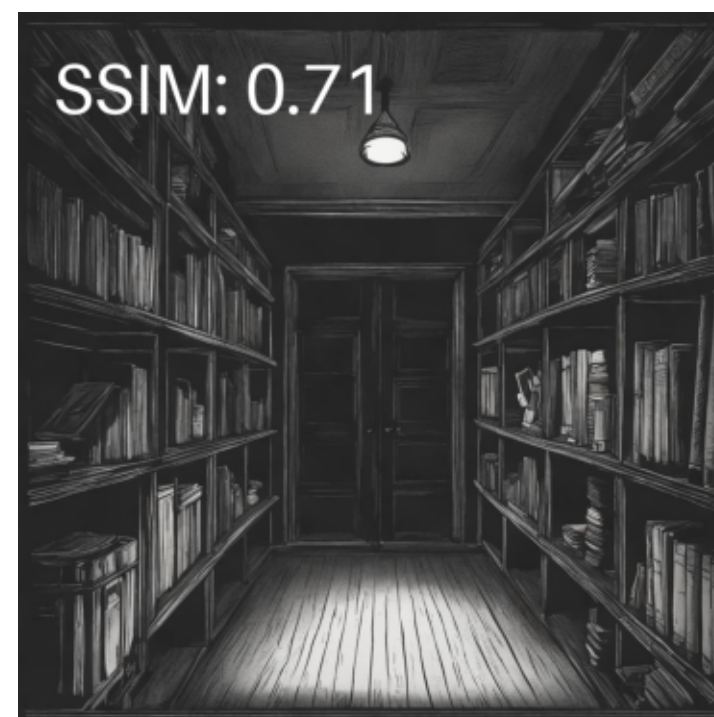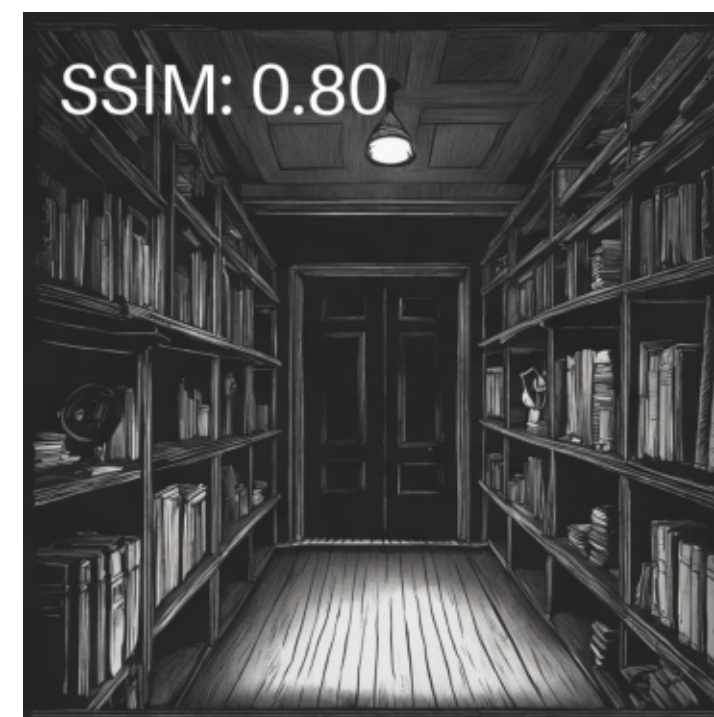



A wooden bed with a brown dog sleeping on top of it.

Step 40

FP32

SSIM: 1.00

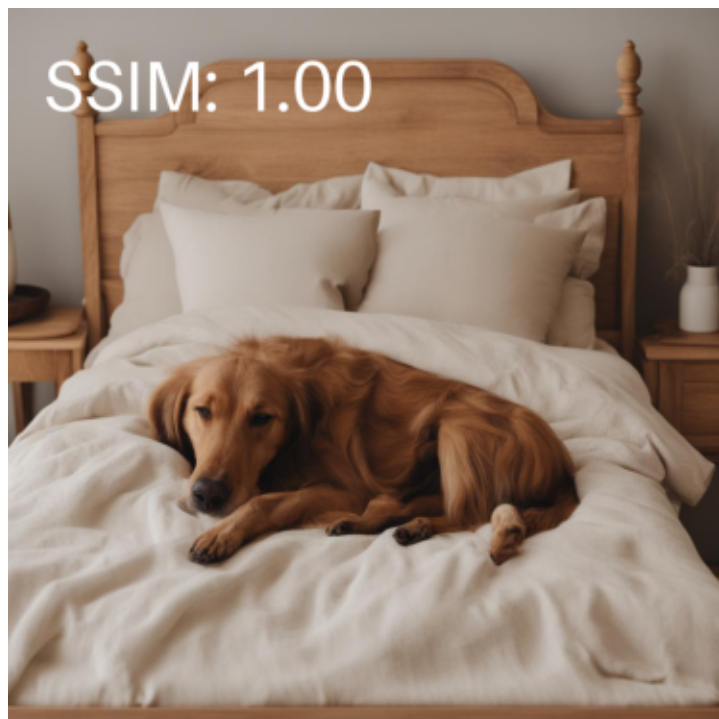

M4E3

SSIM: 0.89

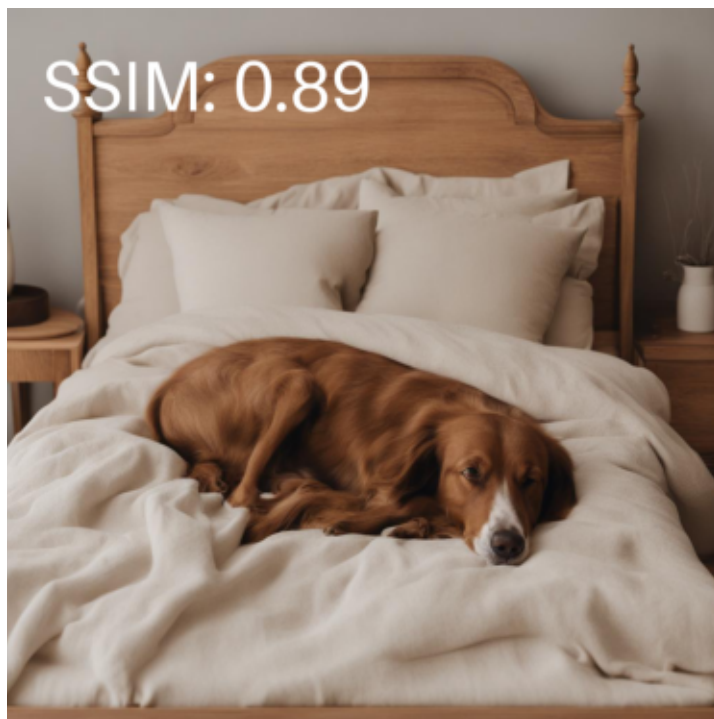

+SR

SSIM: 0.90

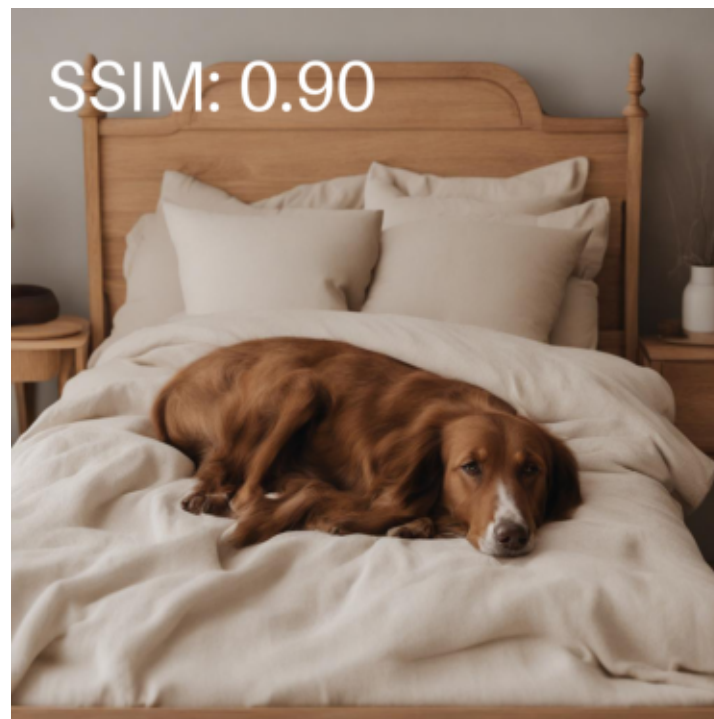

+WSR(p=4)

SSIM: 0.93

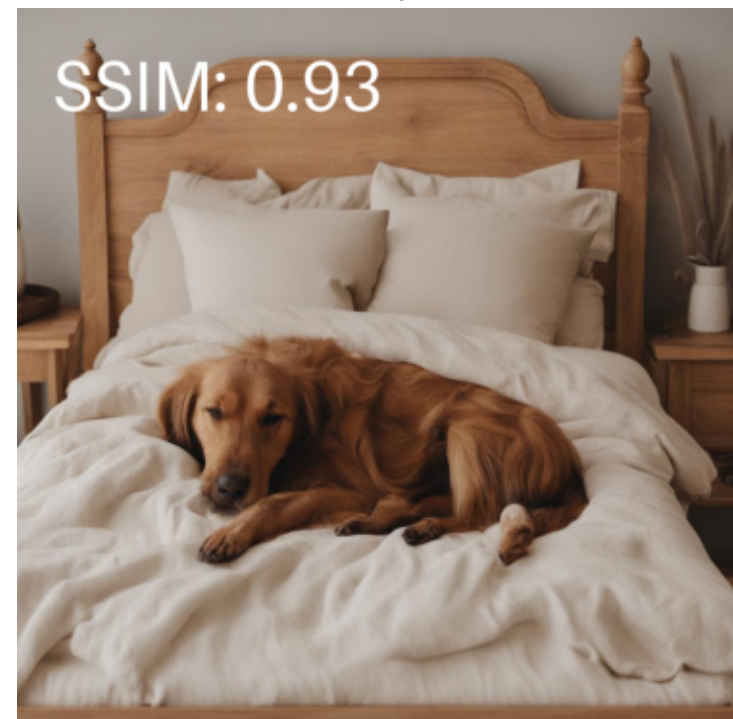

Step 100

SSIM: 1.00

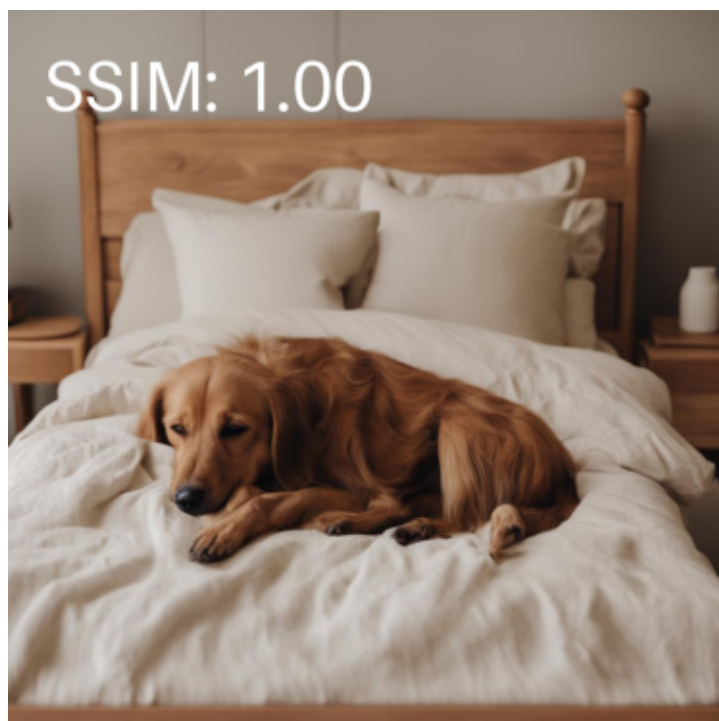

SSIM: 0.89

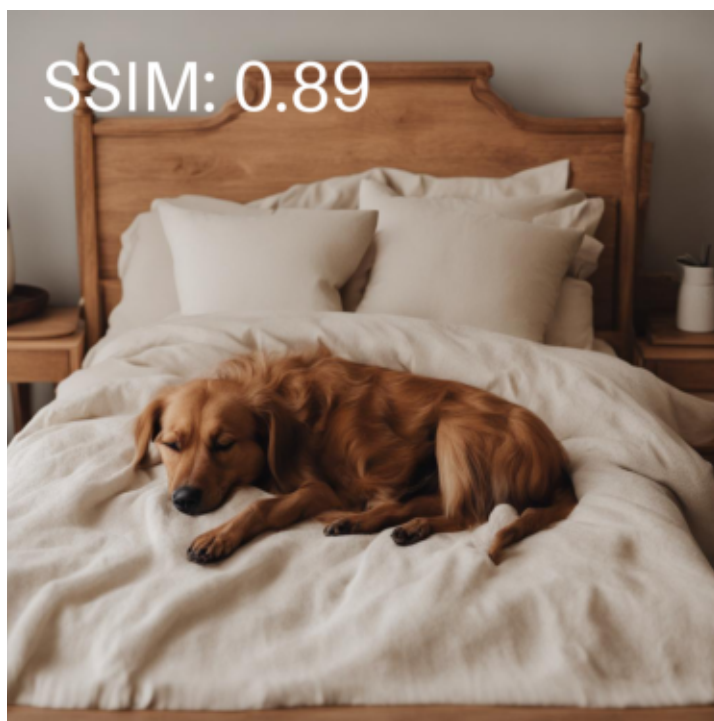

SSIM: 0.94

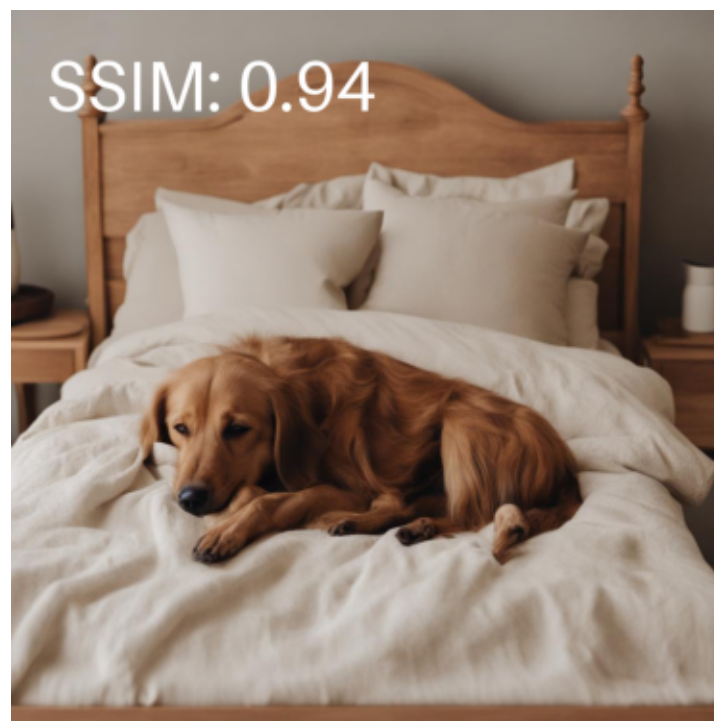

SSIM: 0.94

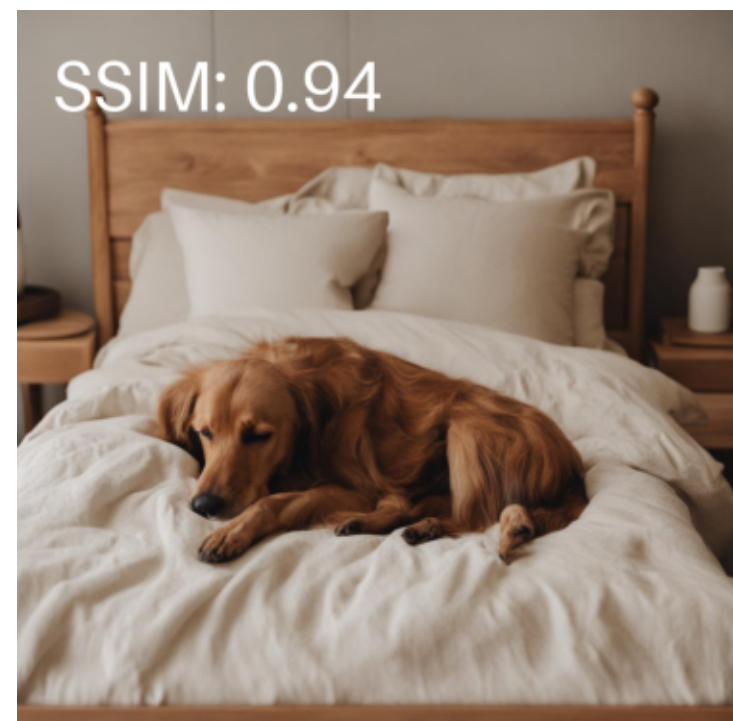

Step 200

SSIM: 1.00

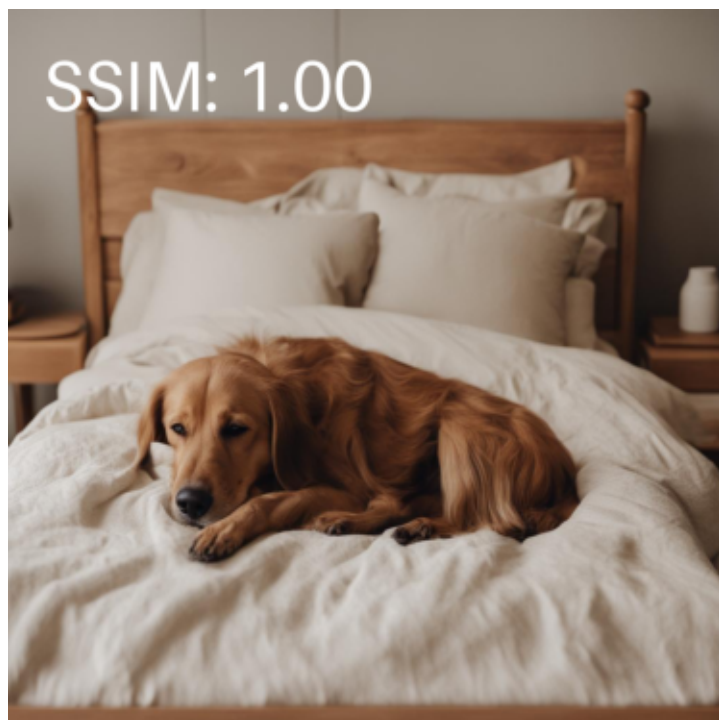

SSIM: 0.90

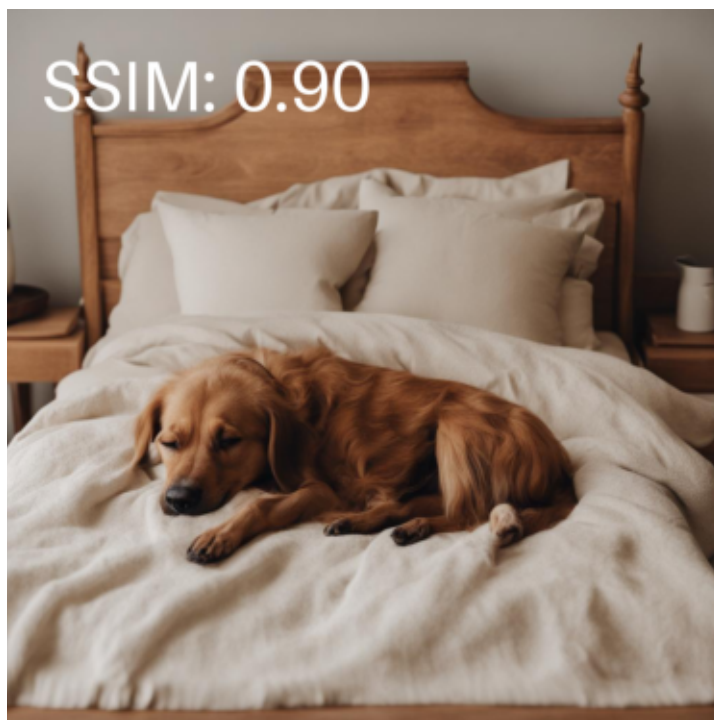

SSIM: 0.95

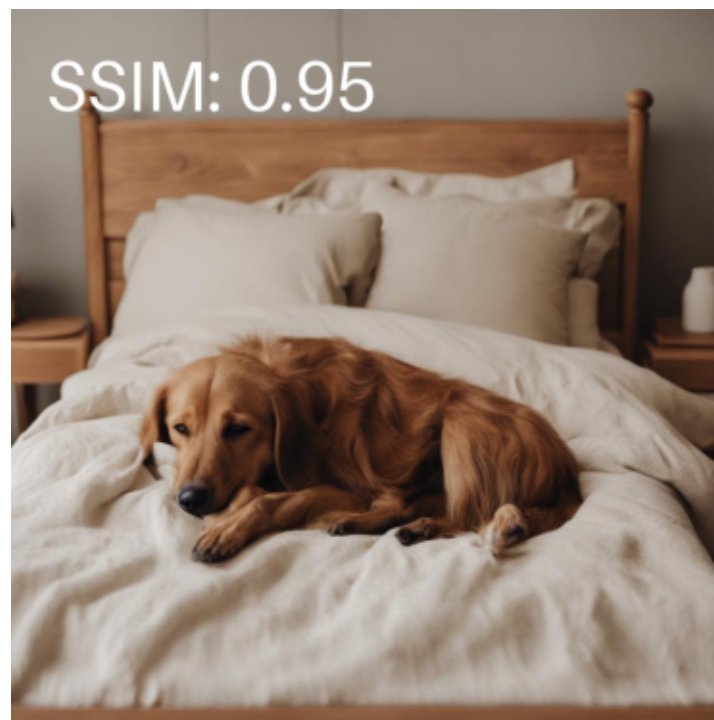

SSIM: 0.97

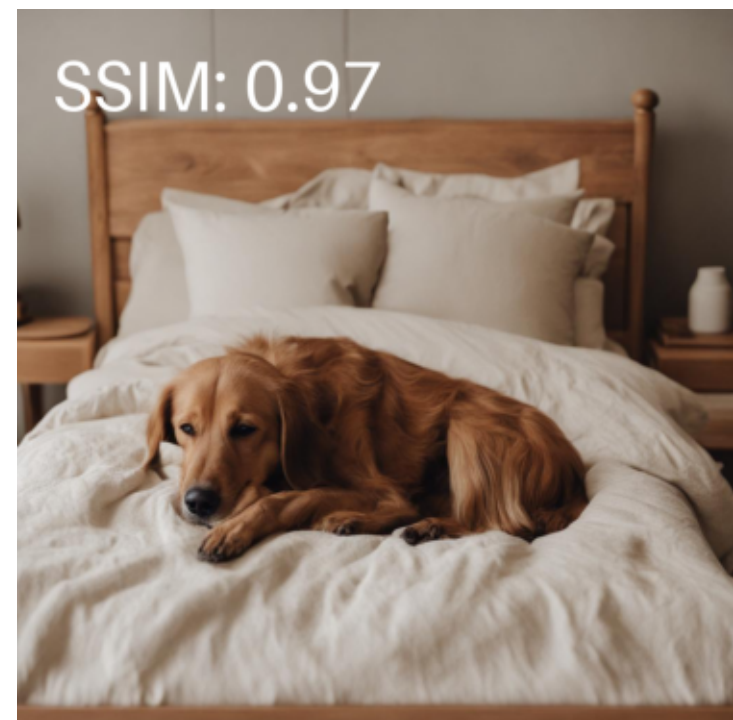



a bed sits under neath a glass fish tank

FP32

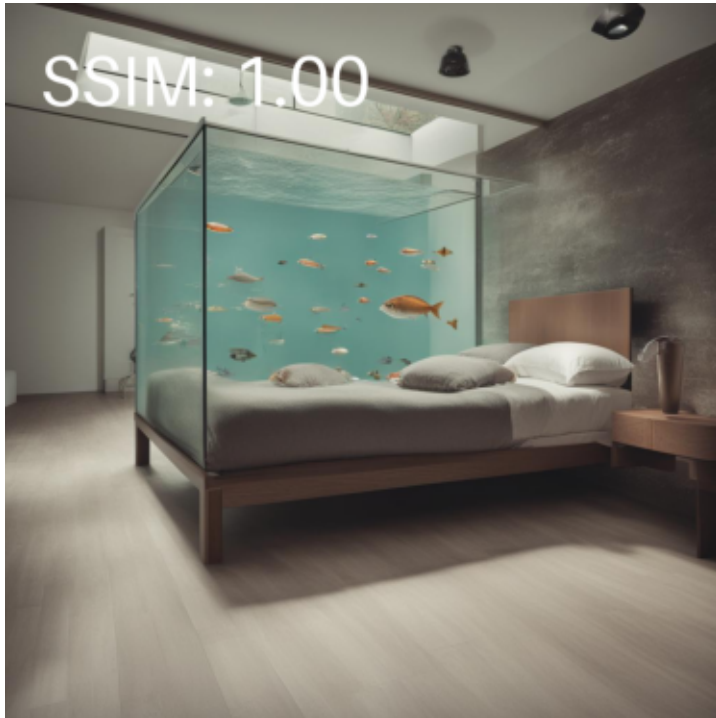

M4E3

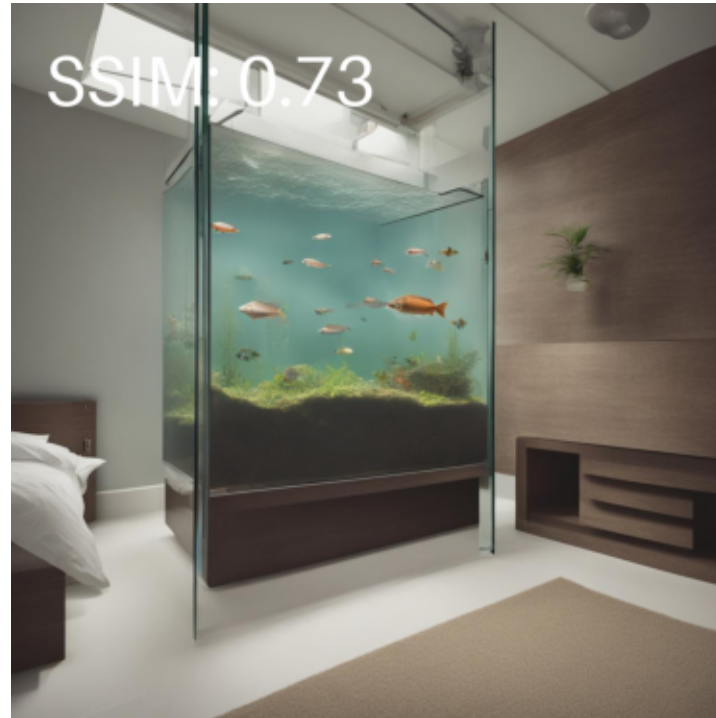

+SR

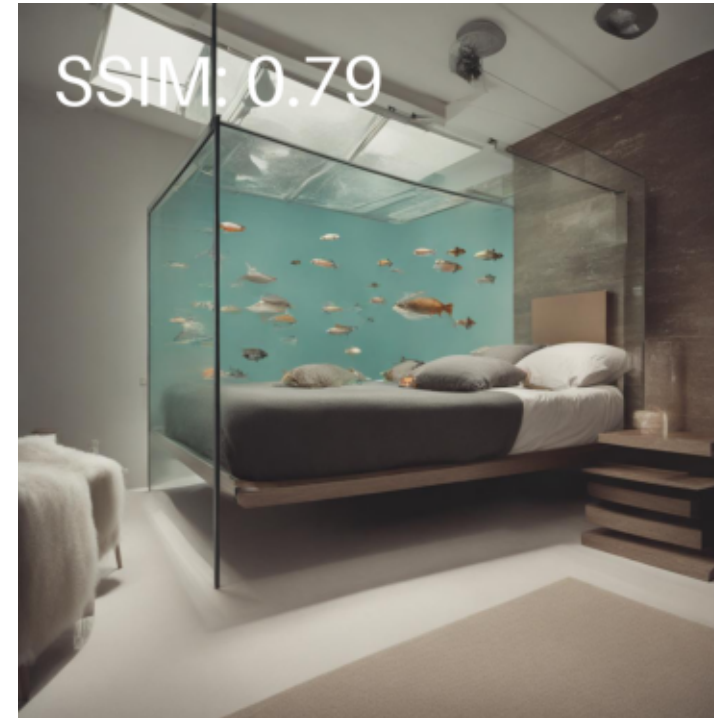

+WSR(p=4)

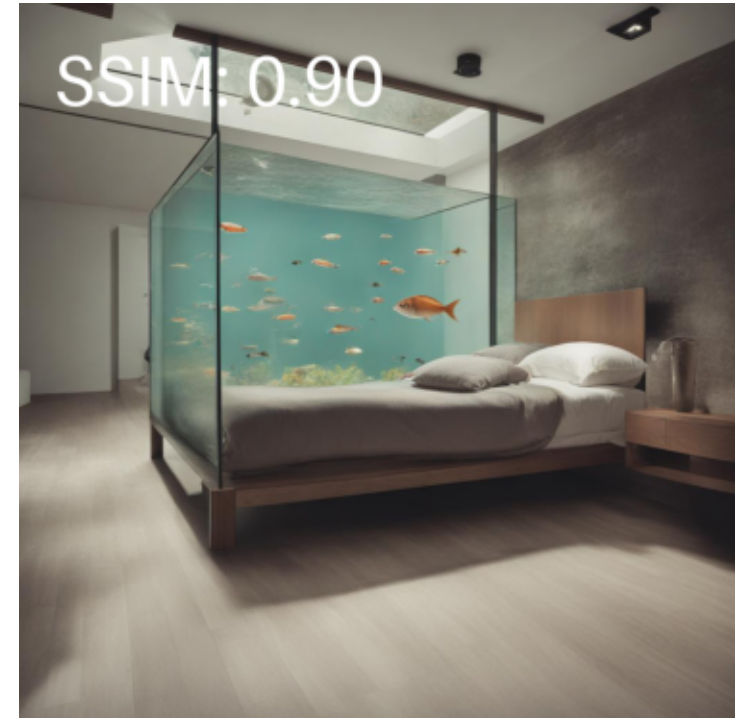

Step 40

SSIM: 1.00

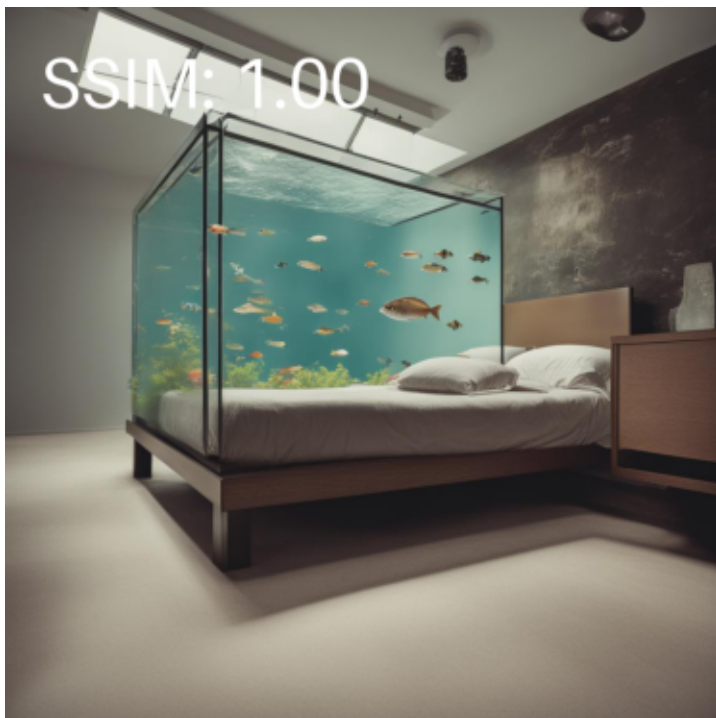

SSIM: 0.79

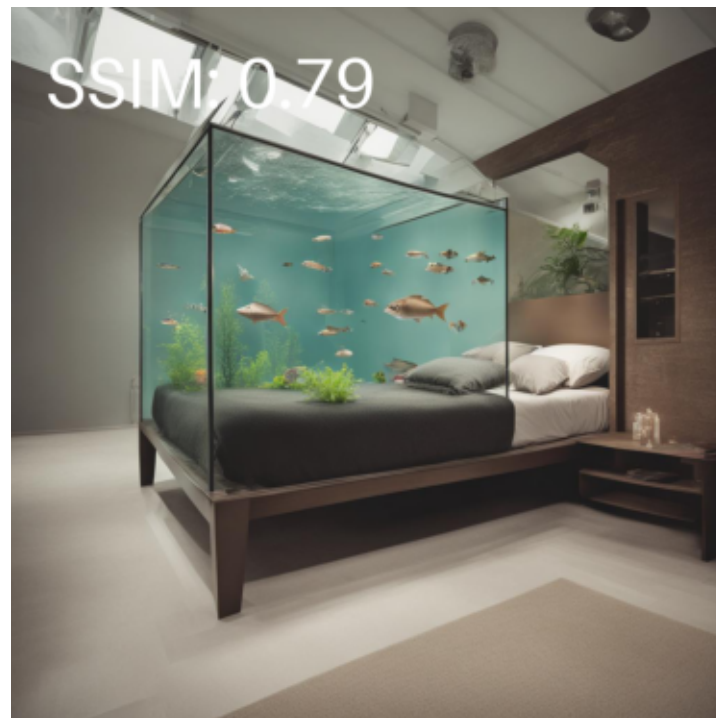

SSIM: 0.90

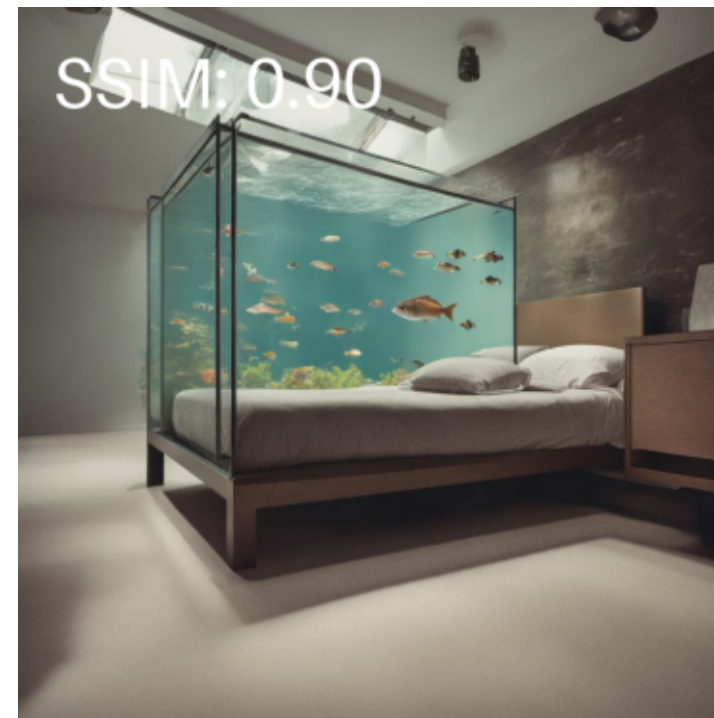

SSIM: 0.81

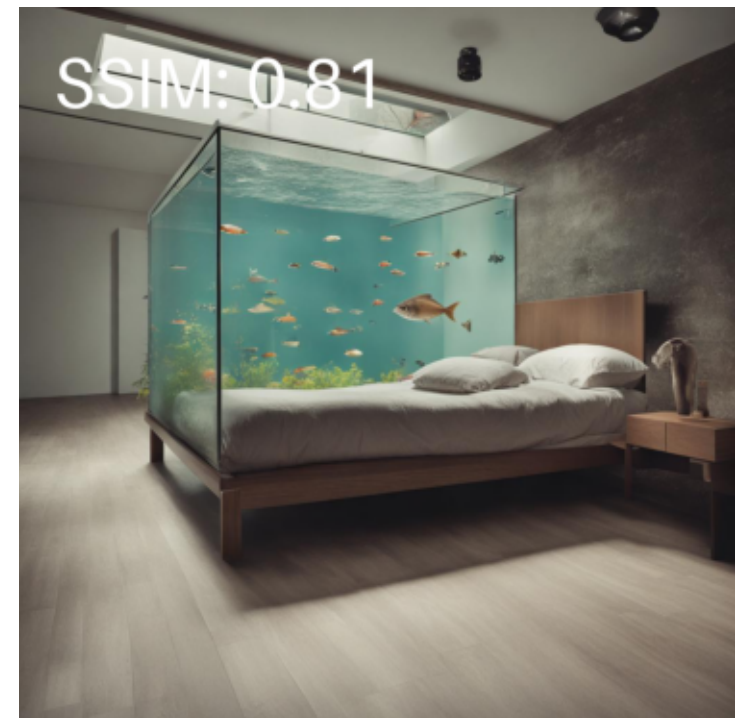

Step 100

SSIM: 1.00

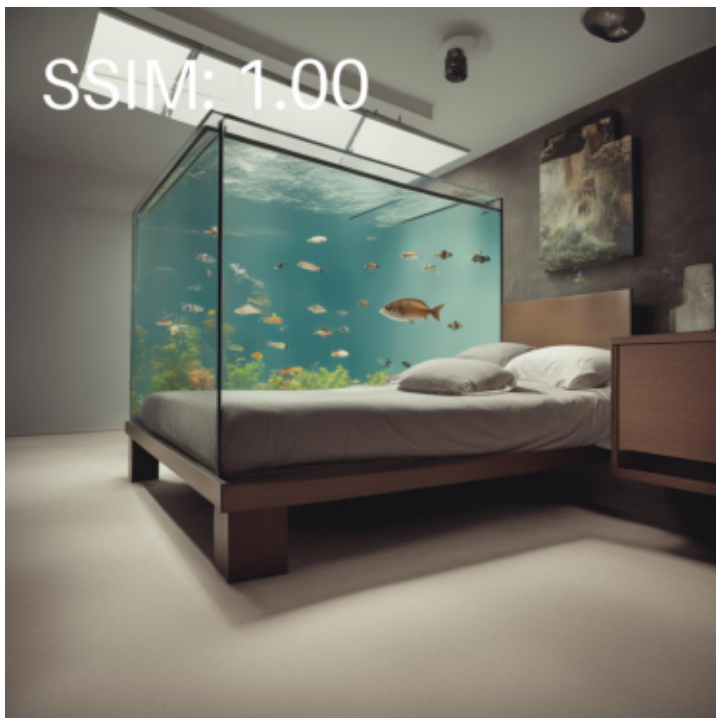

SSIM: 0.75

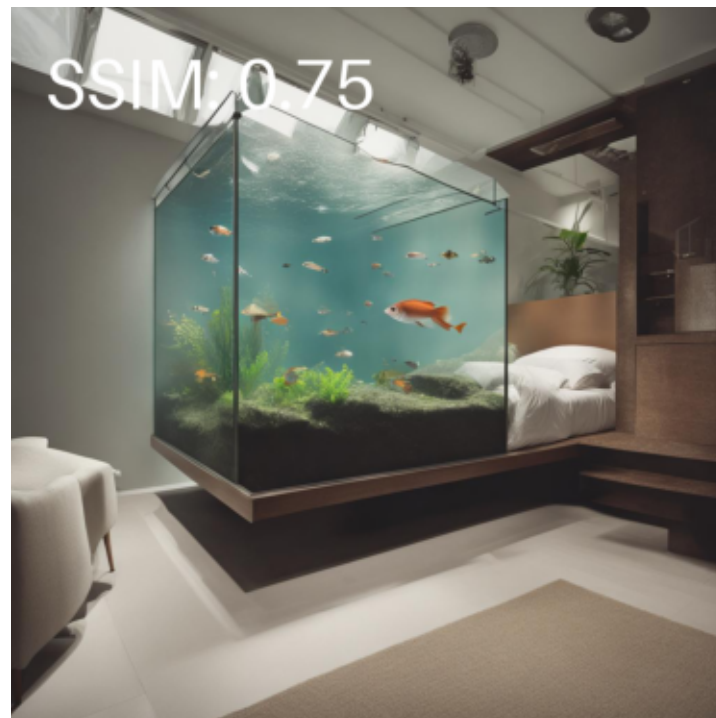

SSIM: 0.84

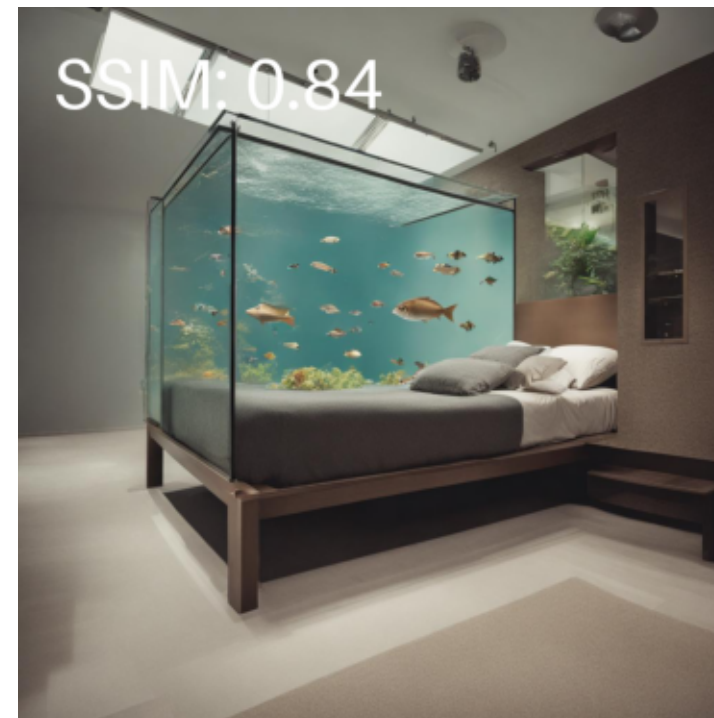

SSIM: 0.87

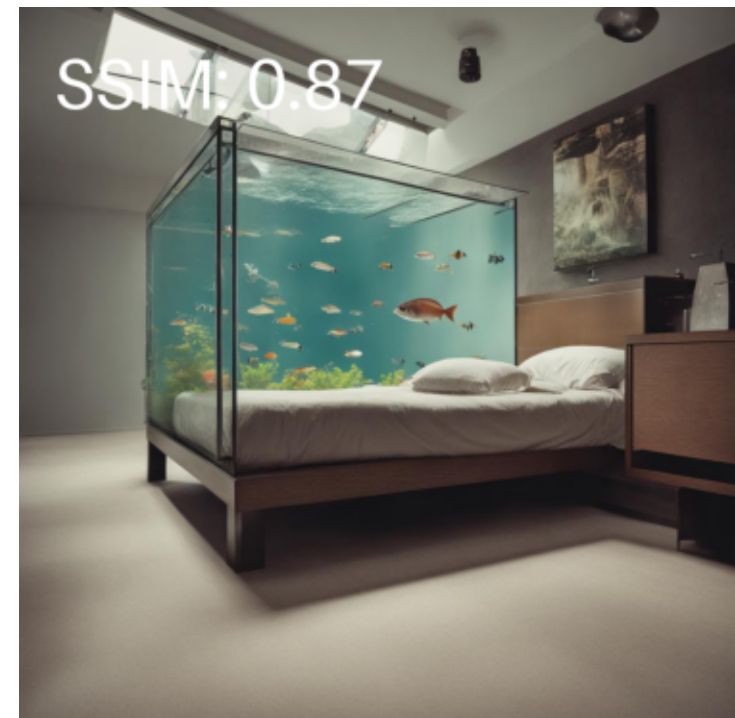

Step 200



A shower has a removable shower head and a glass door.

Step 40

FP32

SSIM: 1.00

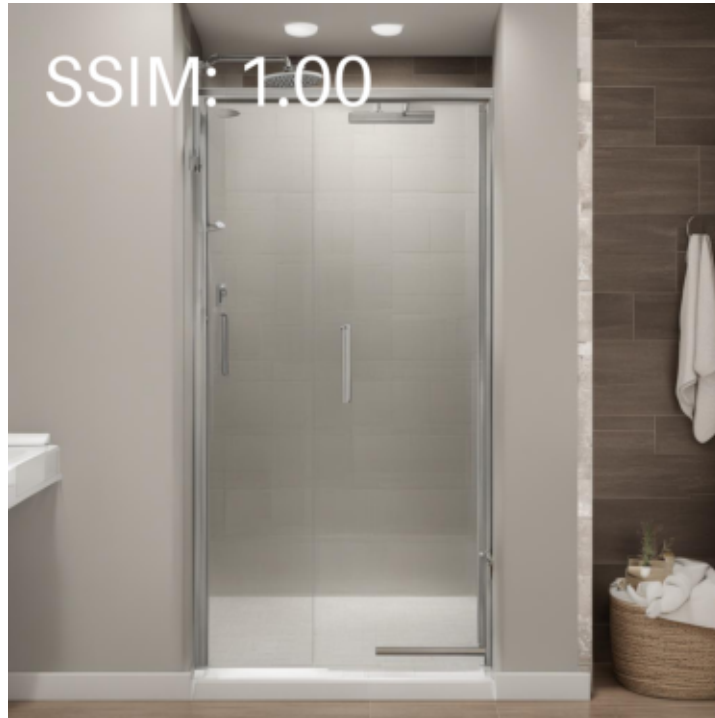

M4E3

SSIM: 0.92

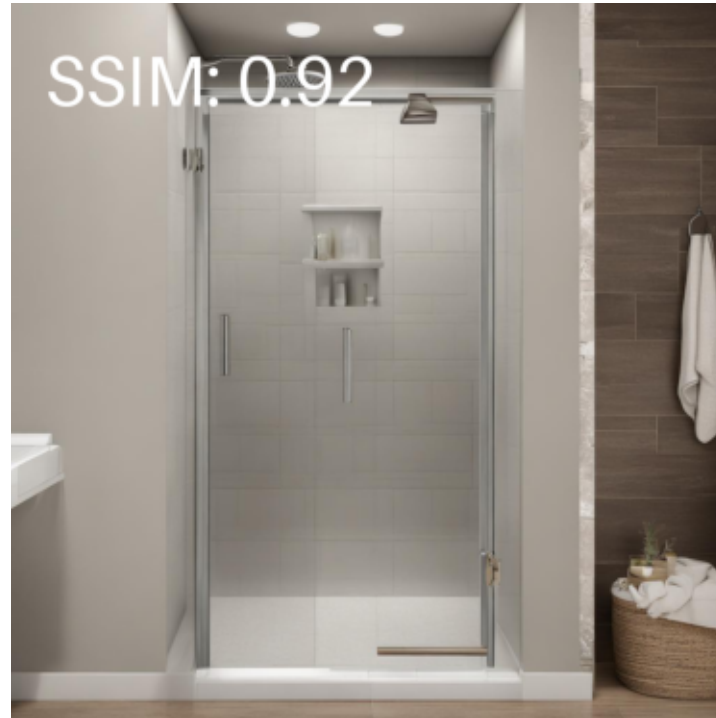

+SR

SSIM: 0.93

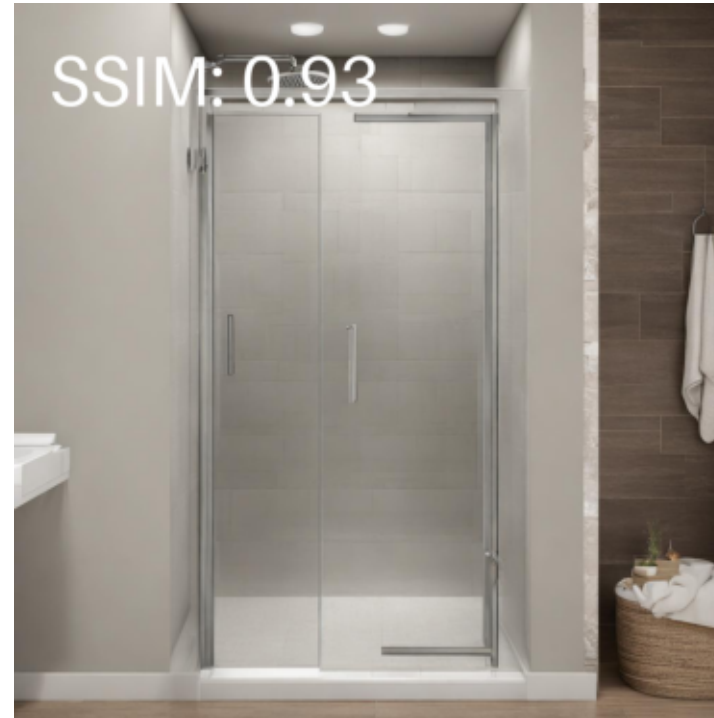

+WSR(p=4)

SSIM: 0.94

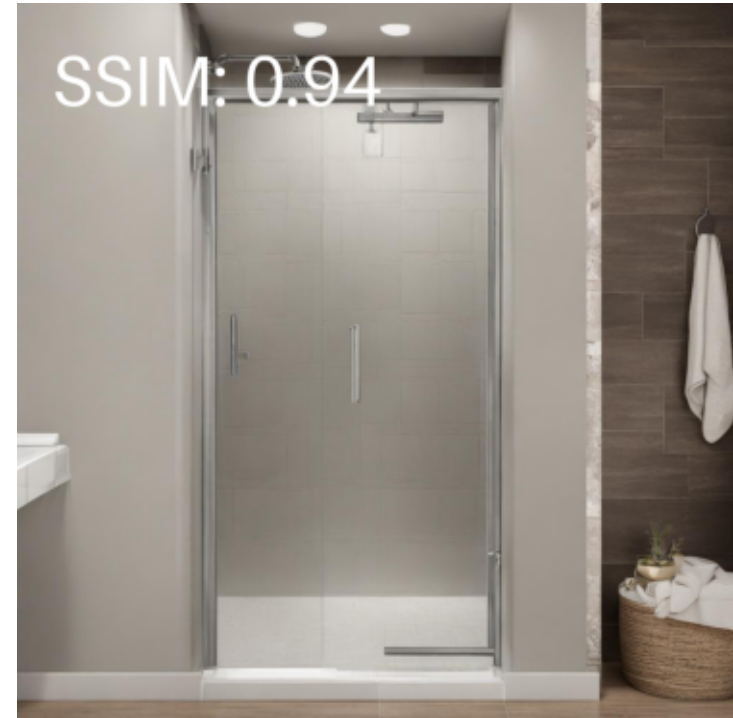

Step 100

SSIM: 1.00

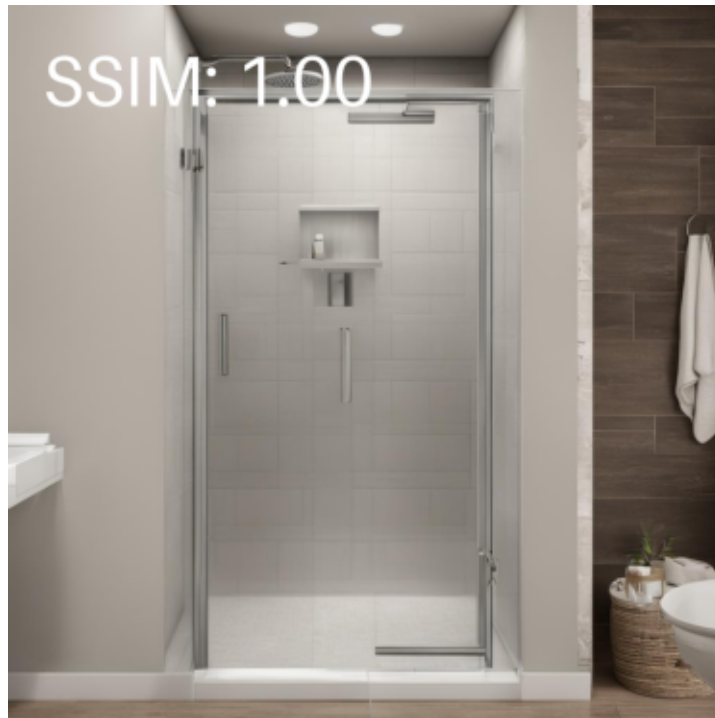

SSIM: 0.91

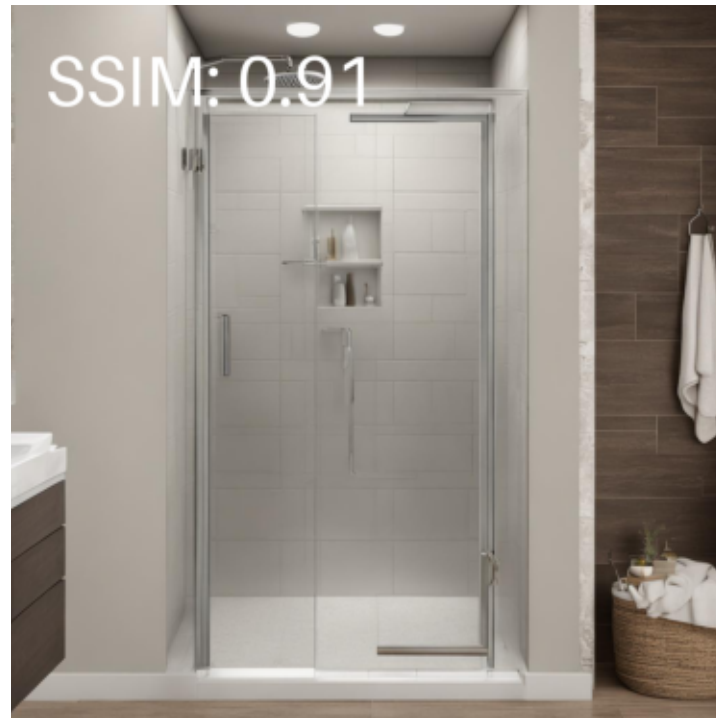

SSIM: 0.91

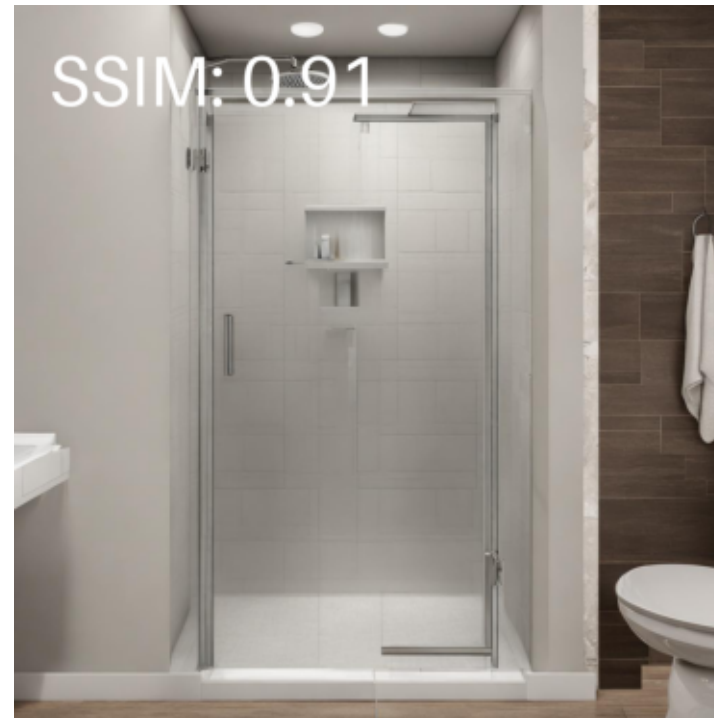

SSIM: 0.94

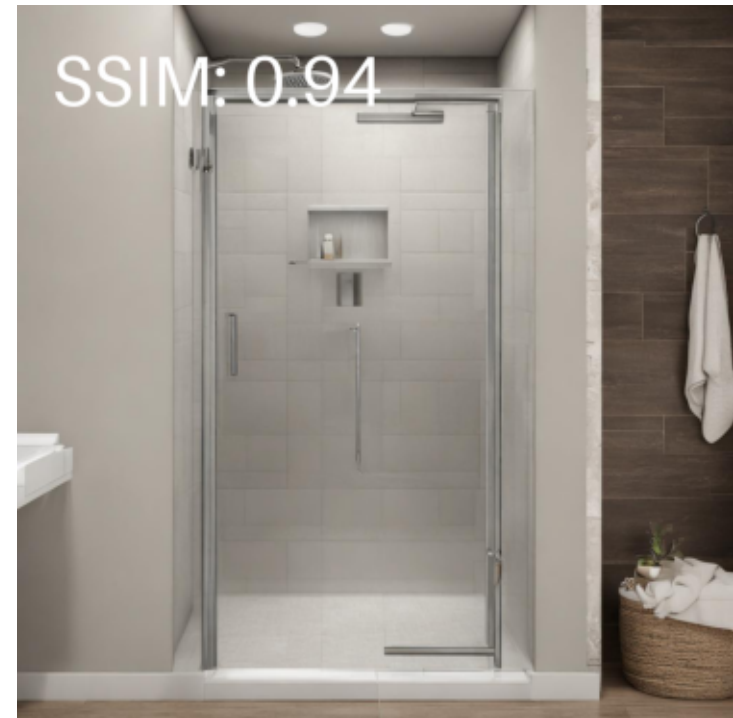

Step 200

SSIM: 1.00

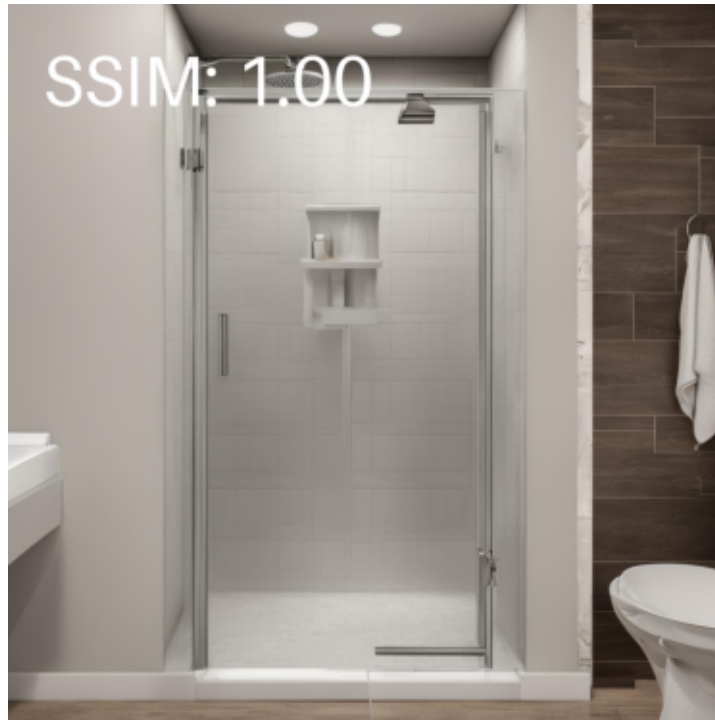

SSIM: 0.89

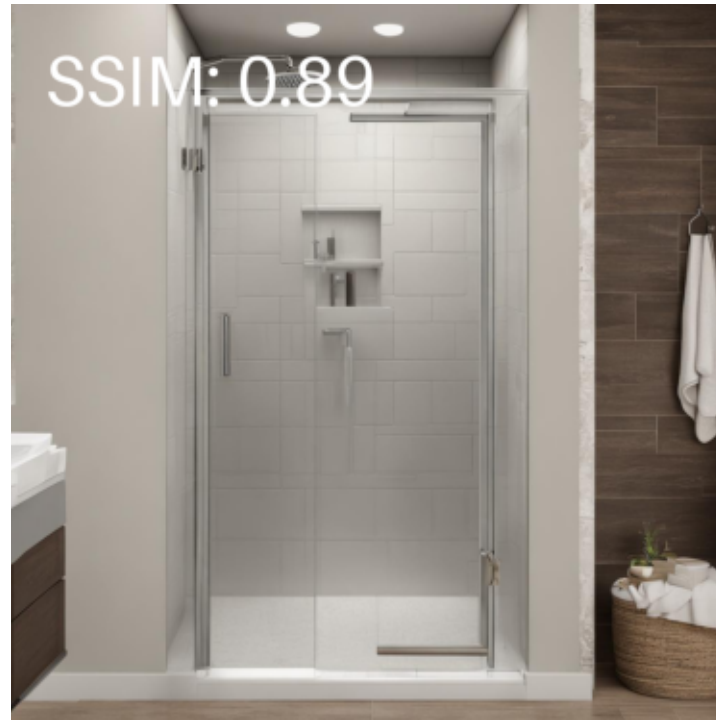

SSIM: 0.93

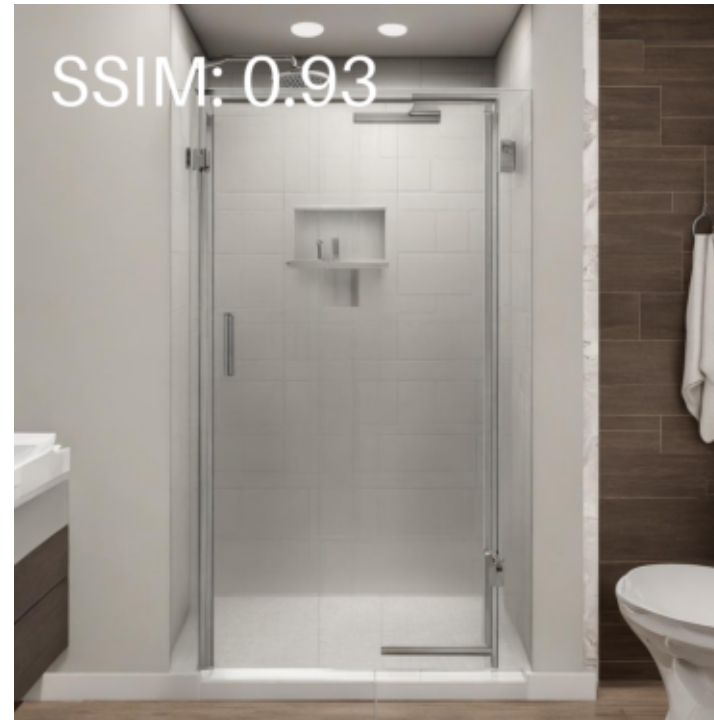

SSIM: 0.95

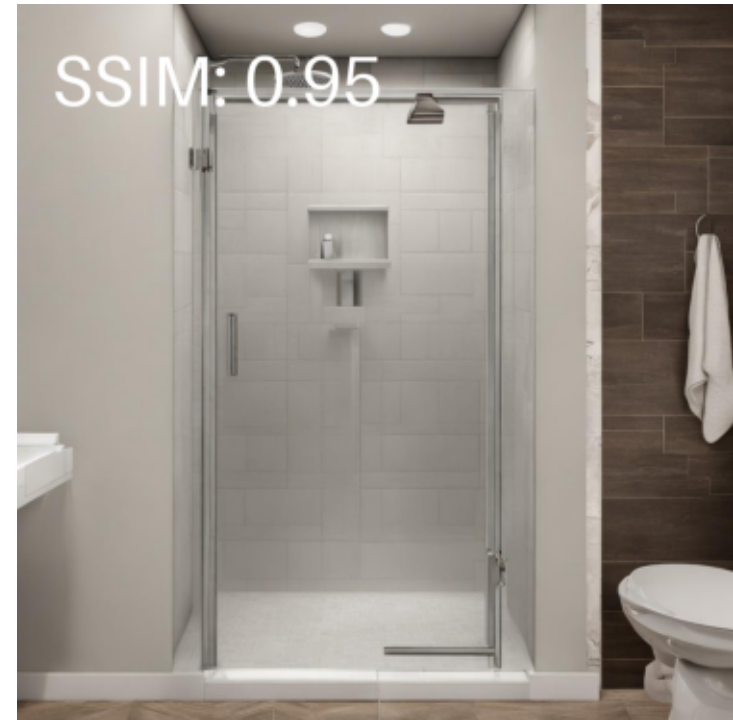



The two figurines and bells are under the clock.

Step 40

FP32

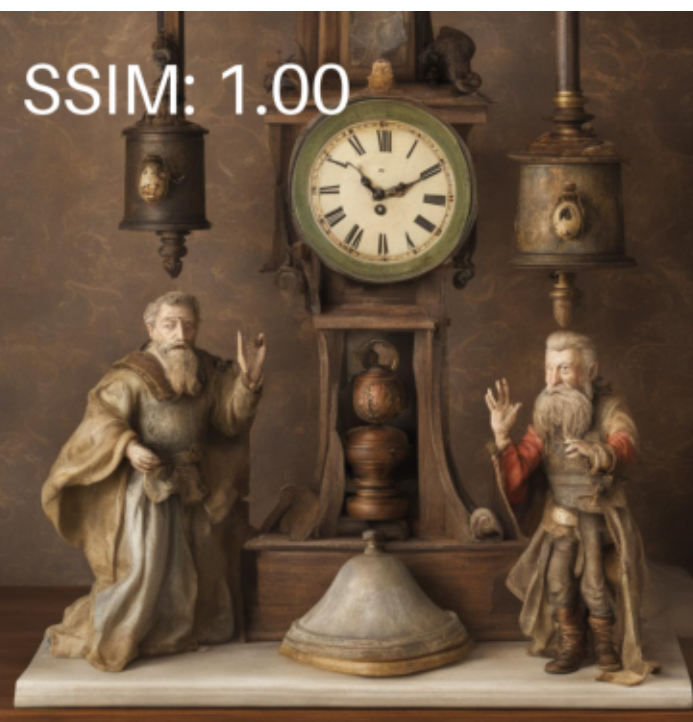

M4E3

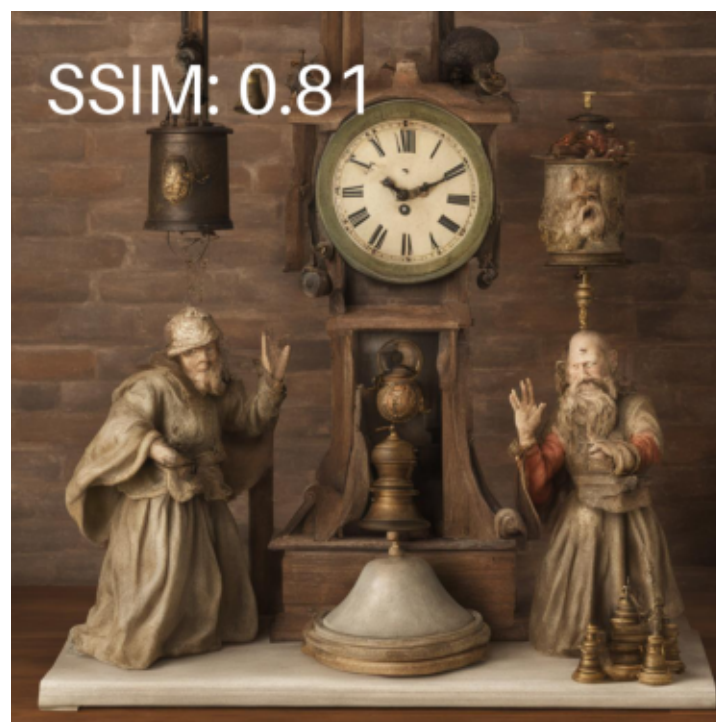

+SR

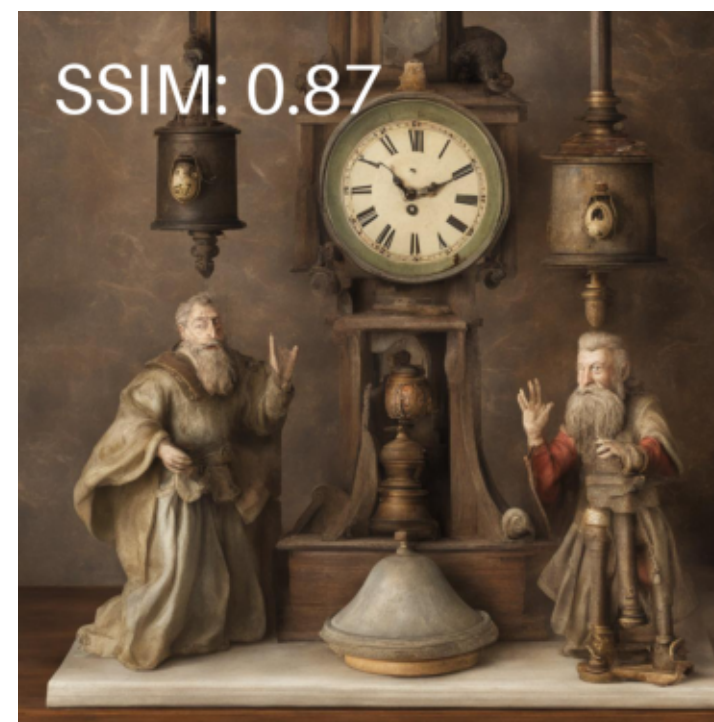

+WSR(p=4)

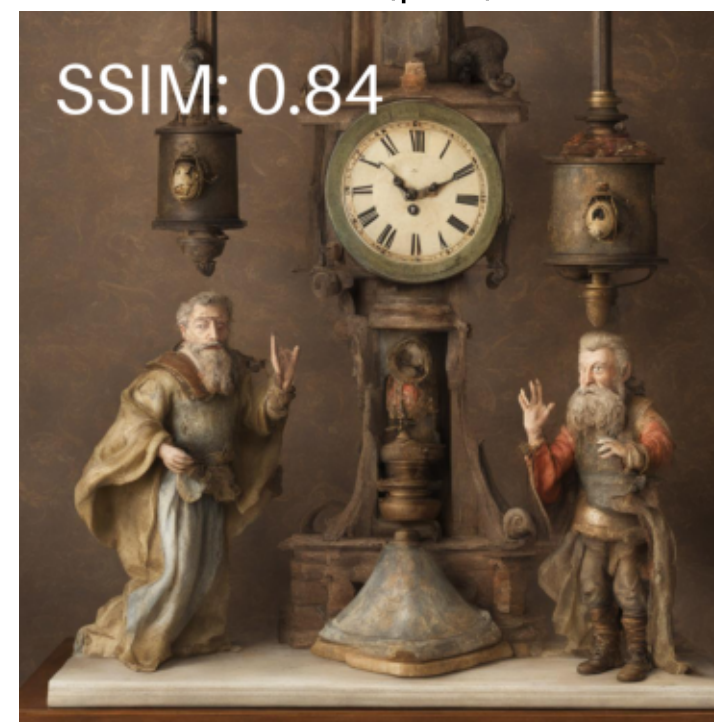

Step 100

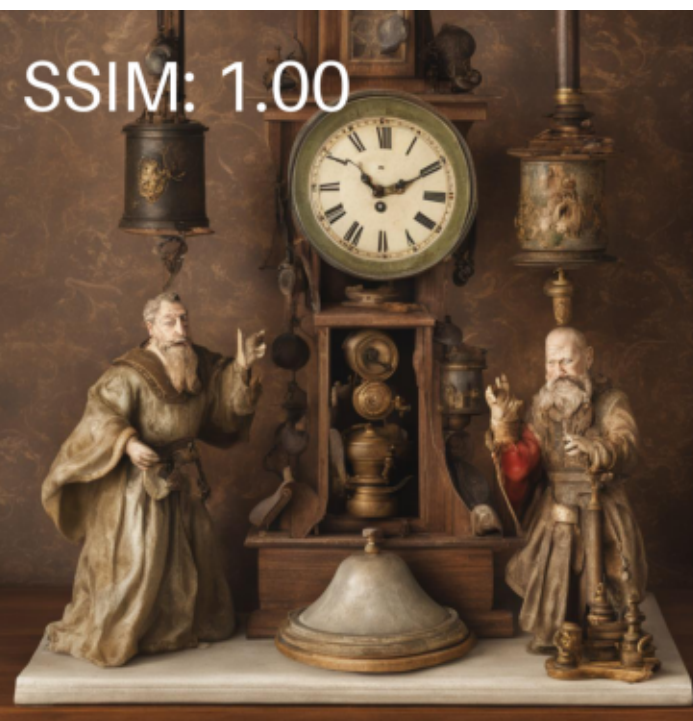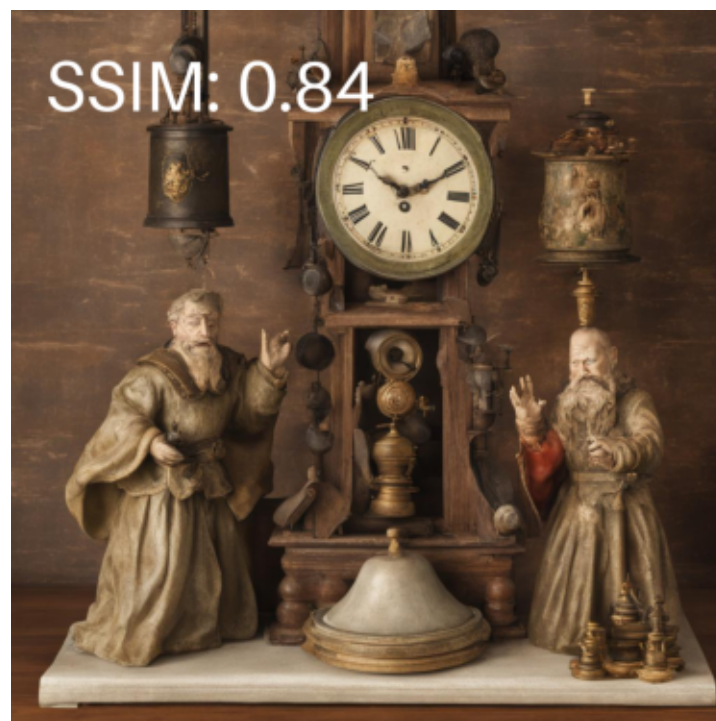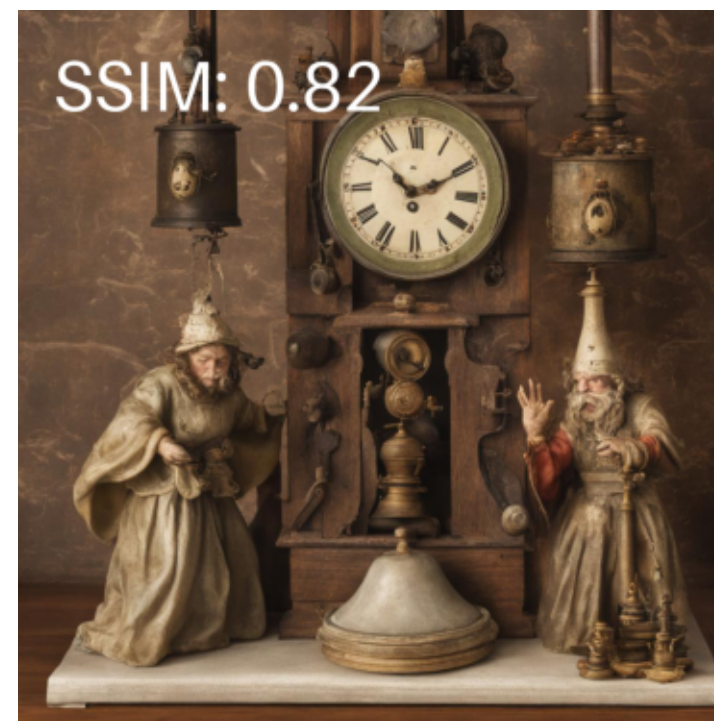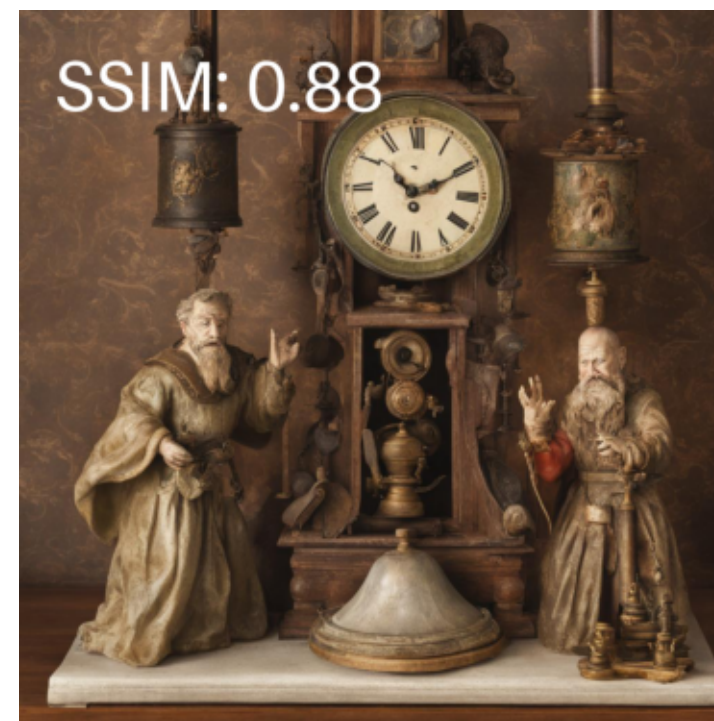

Step 200

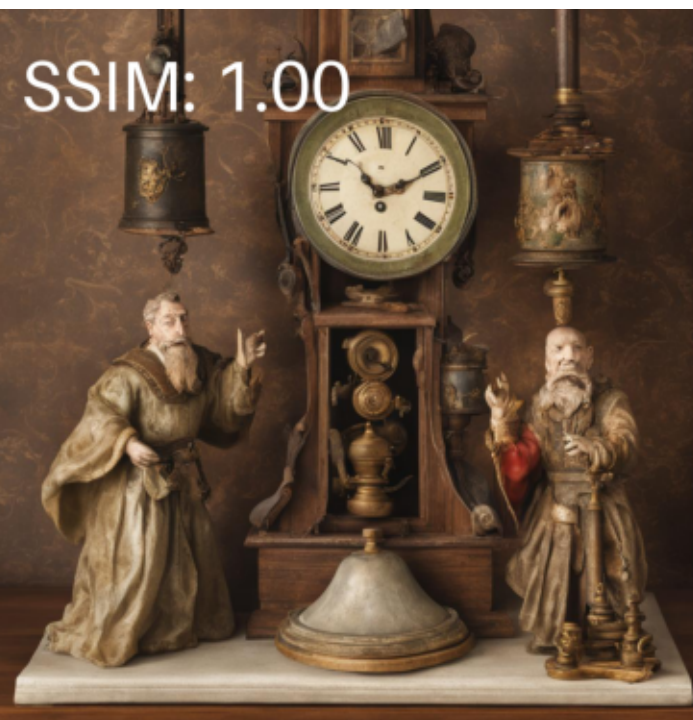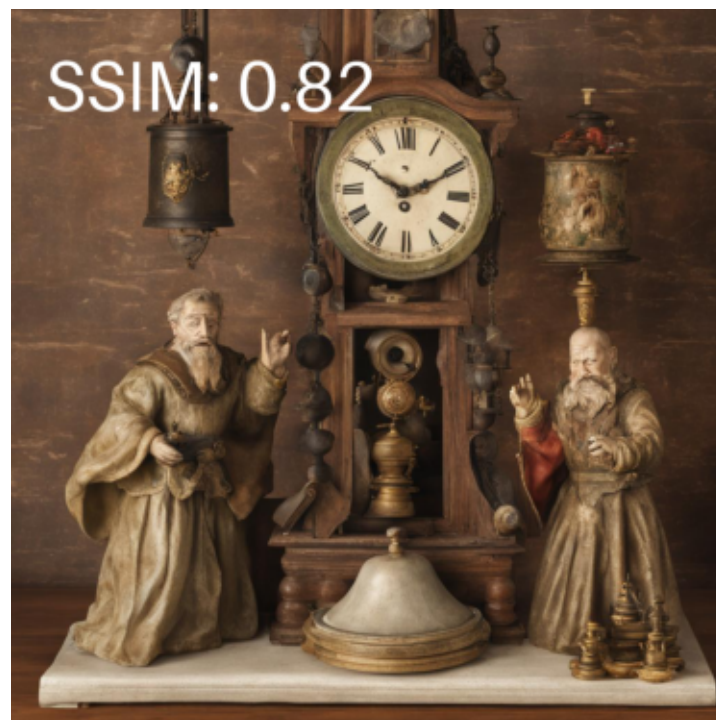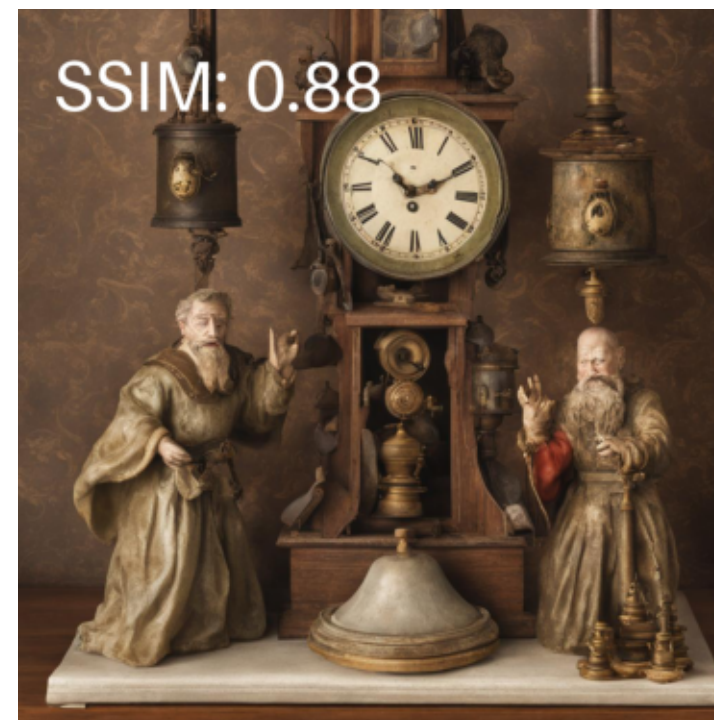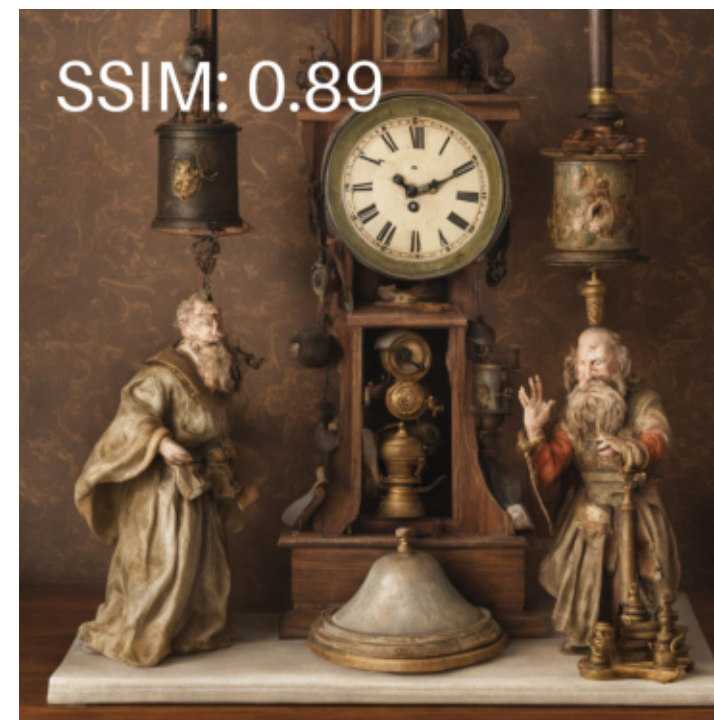



A pond of water with three giraffe walking in the dirt.

Step 40

FP32

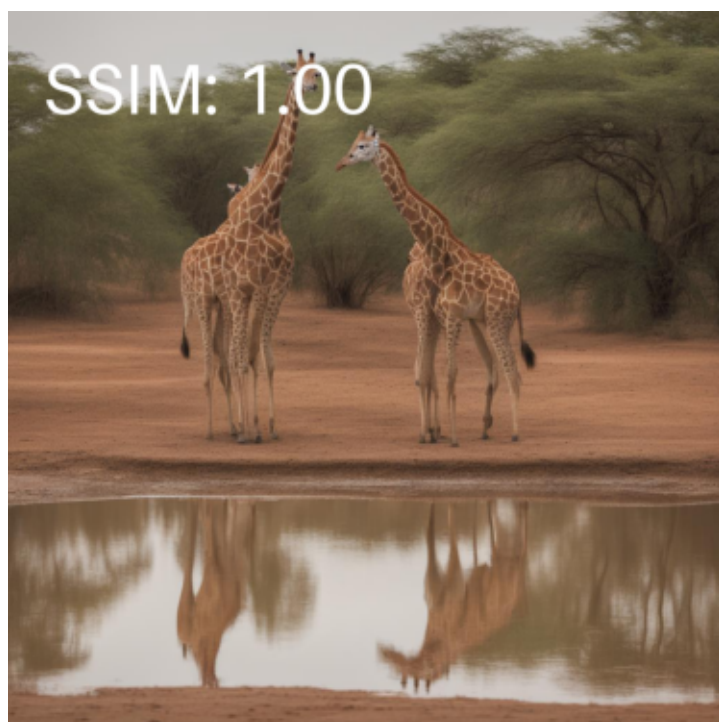

M4E3

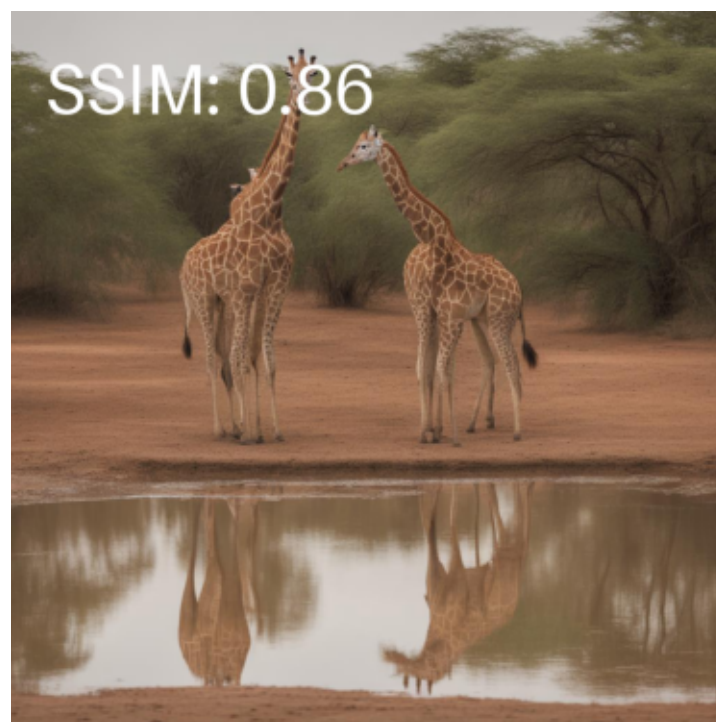

+SR

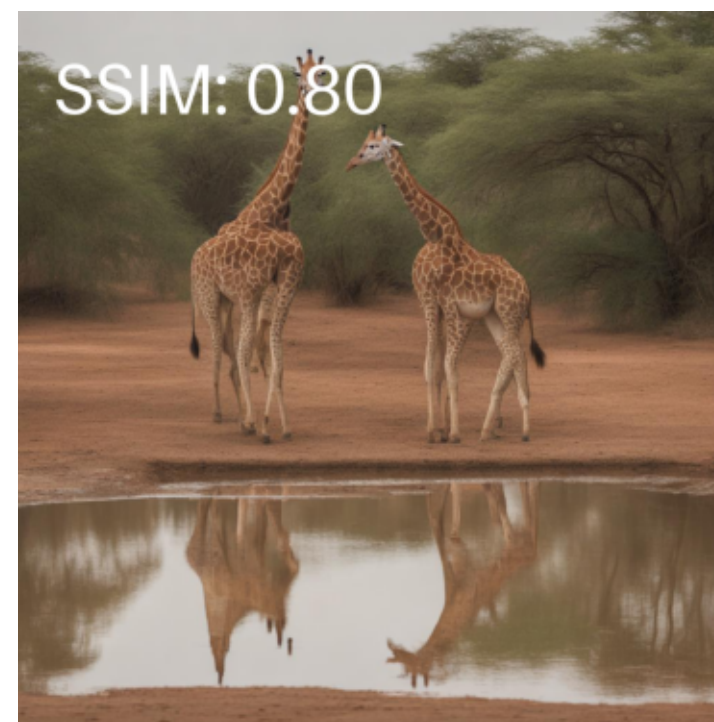

+WSR(p=4)

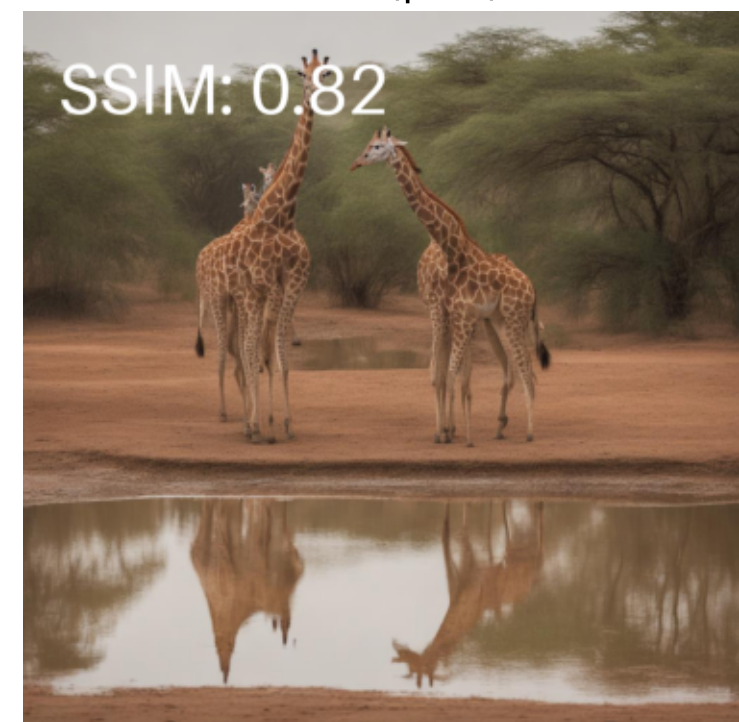

Step 100

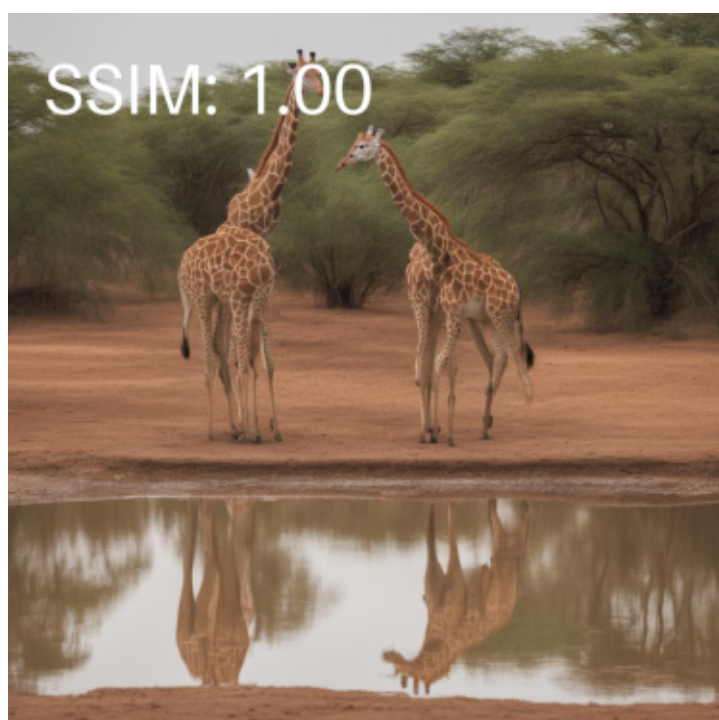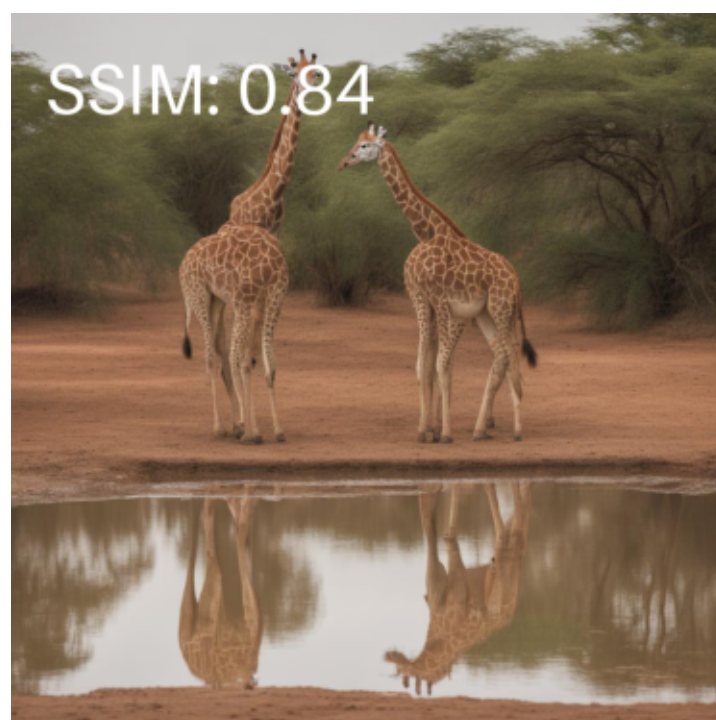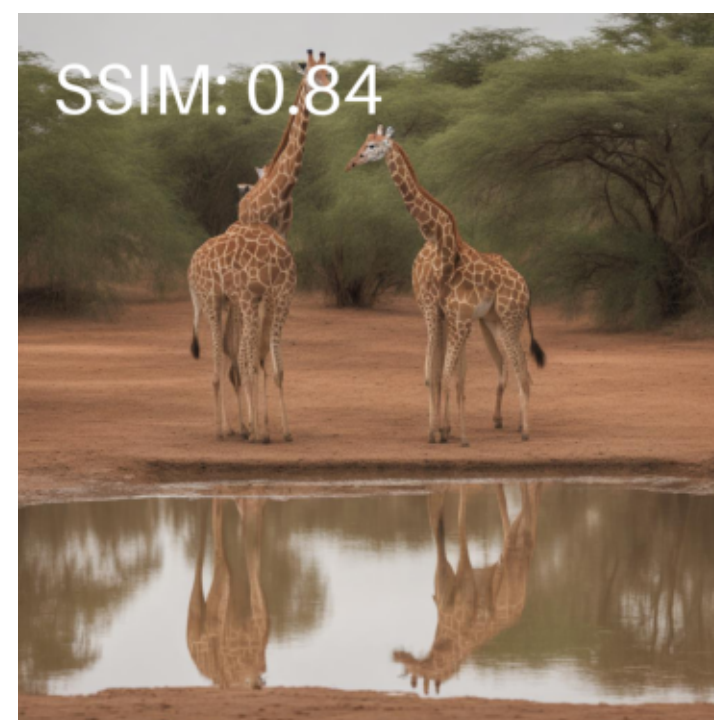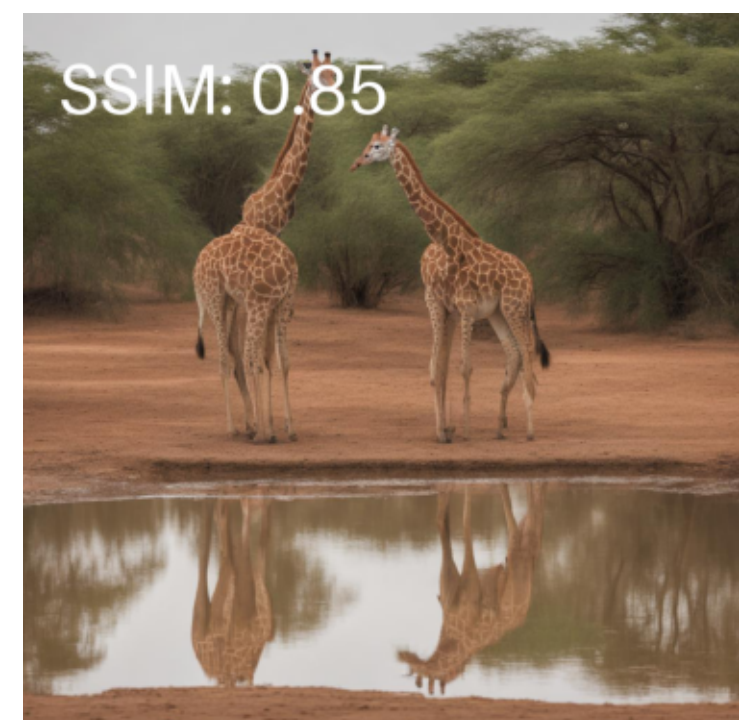

Step 200

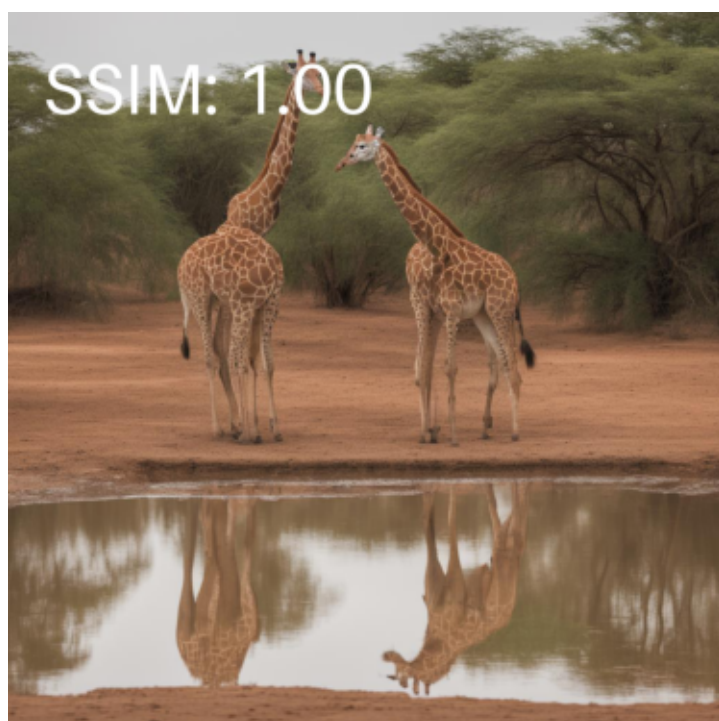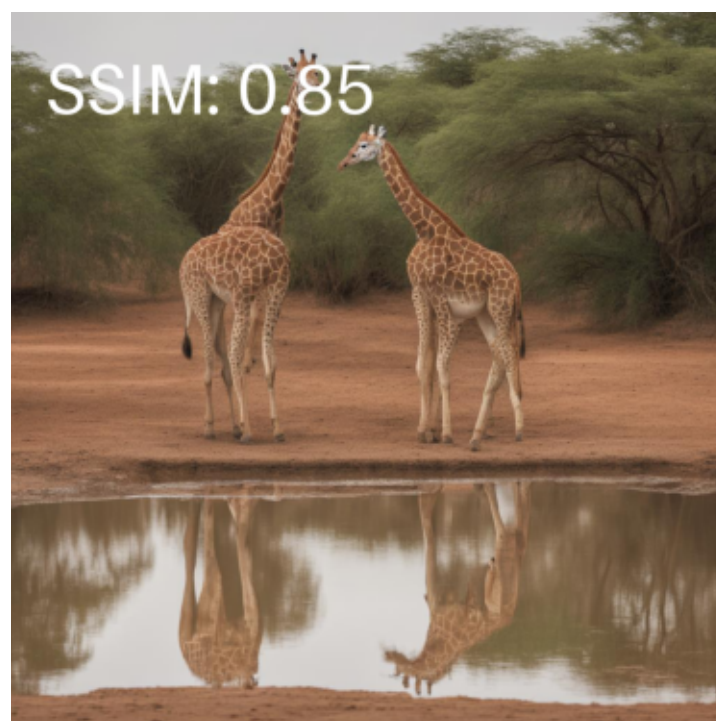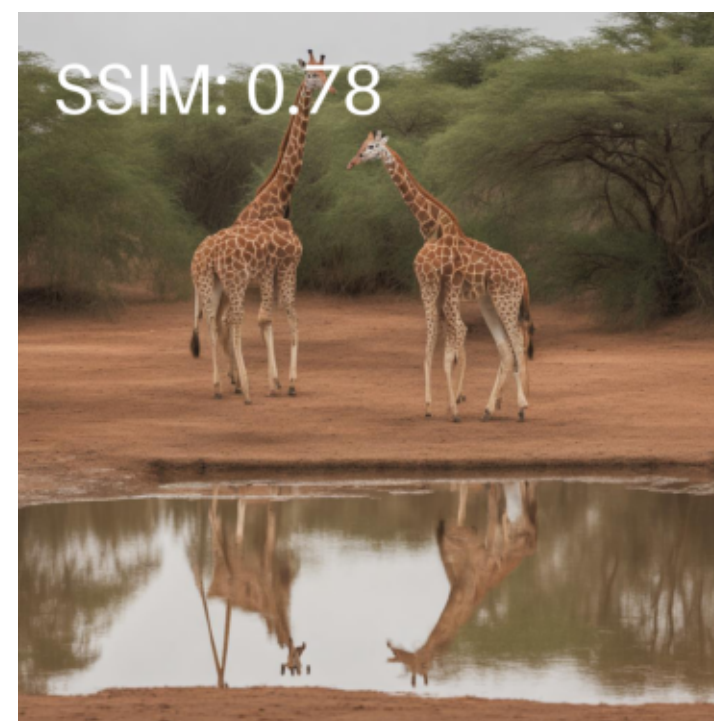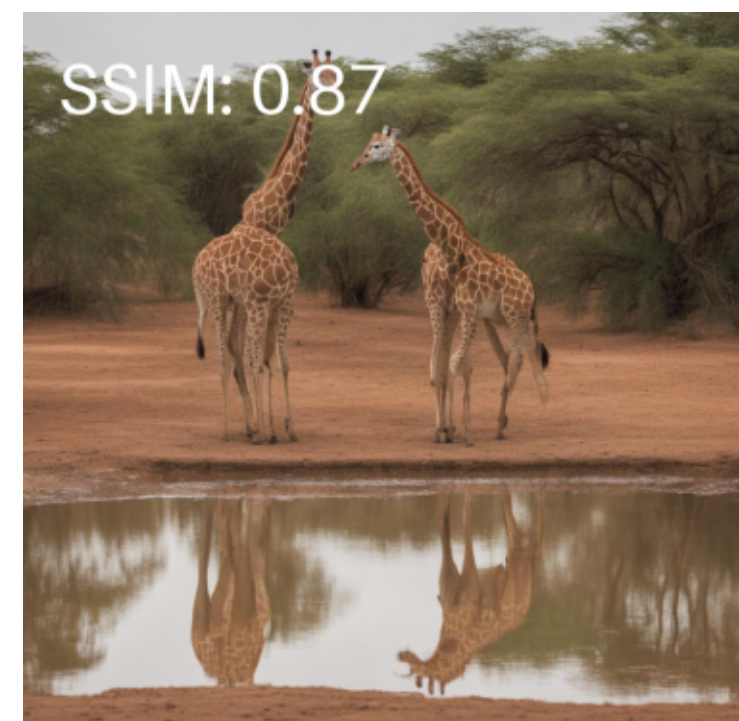



Fast commuter train moving past an outdoor platform.

Step 40

FP32

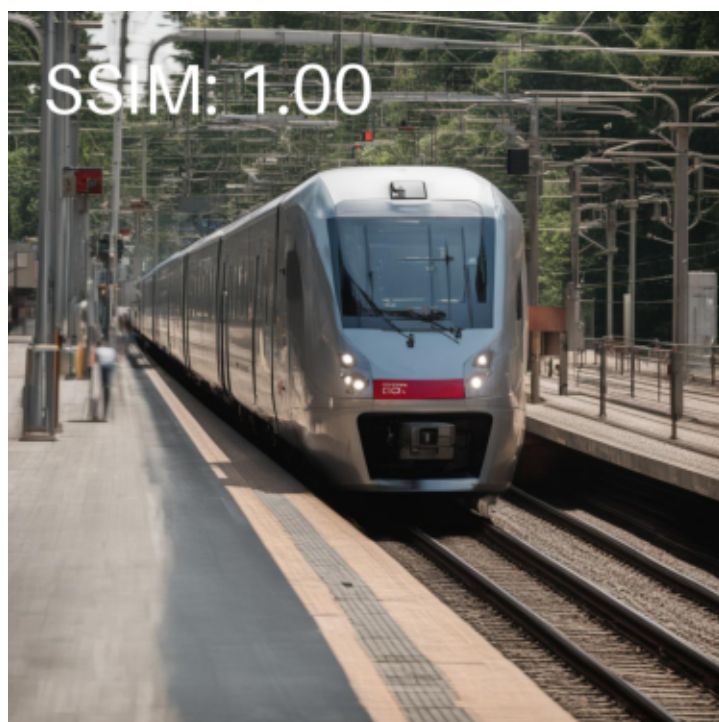

M4E3

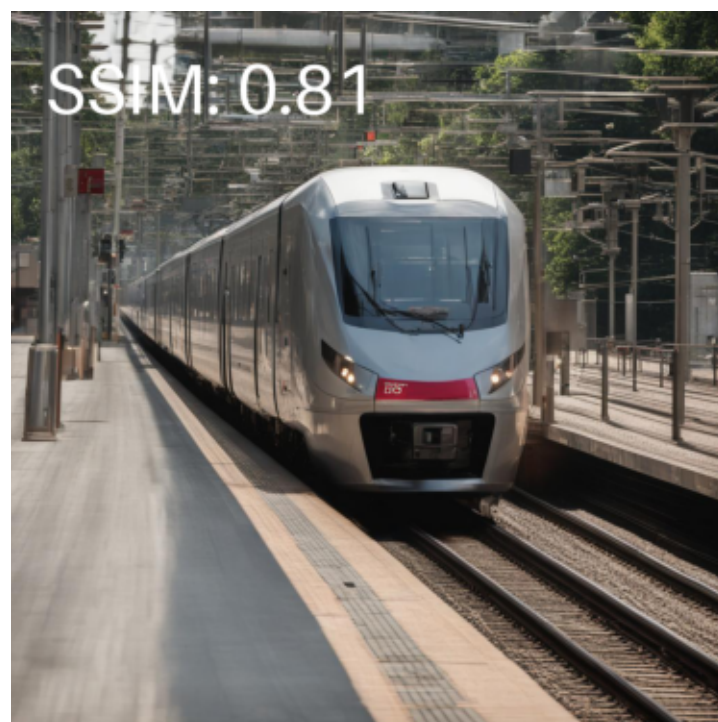

+SR

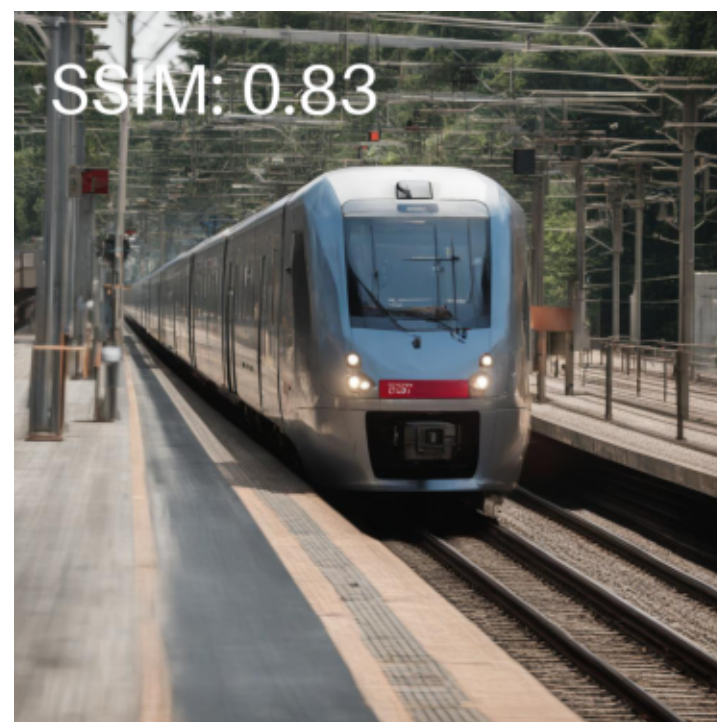

+WSR(p=4)

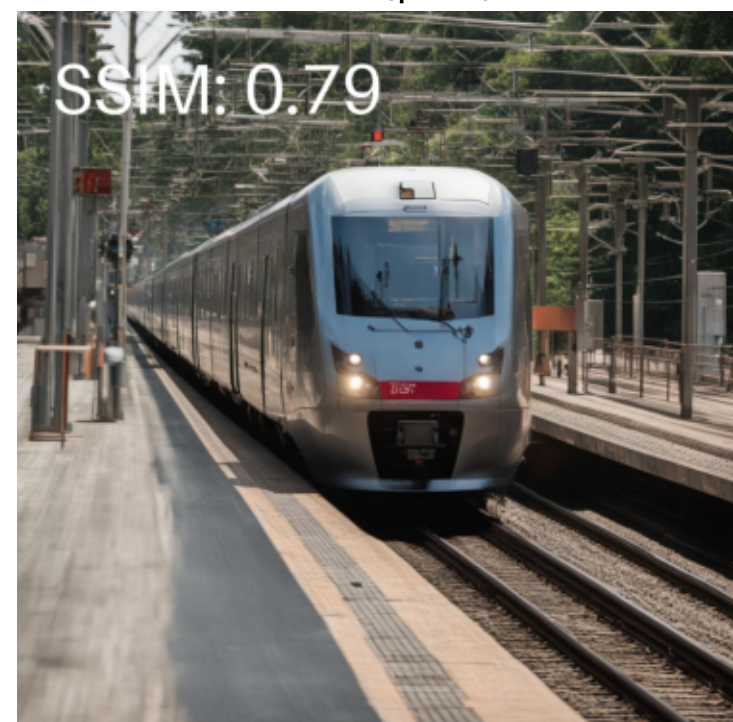

Step 100

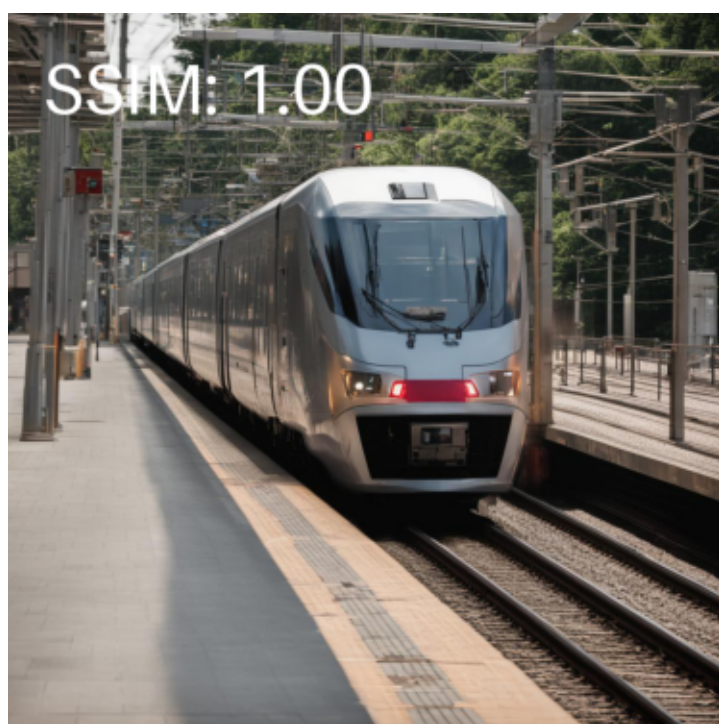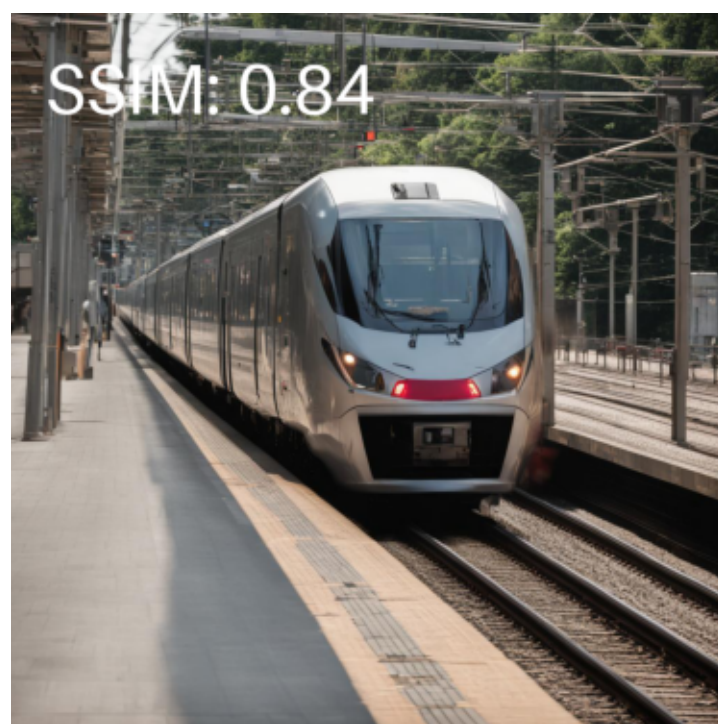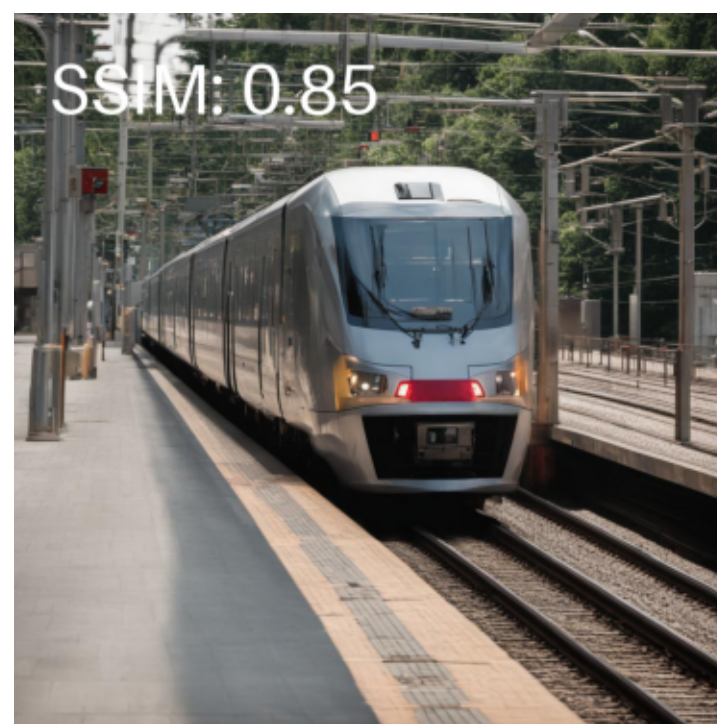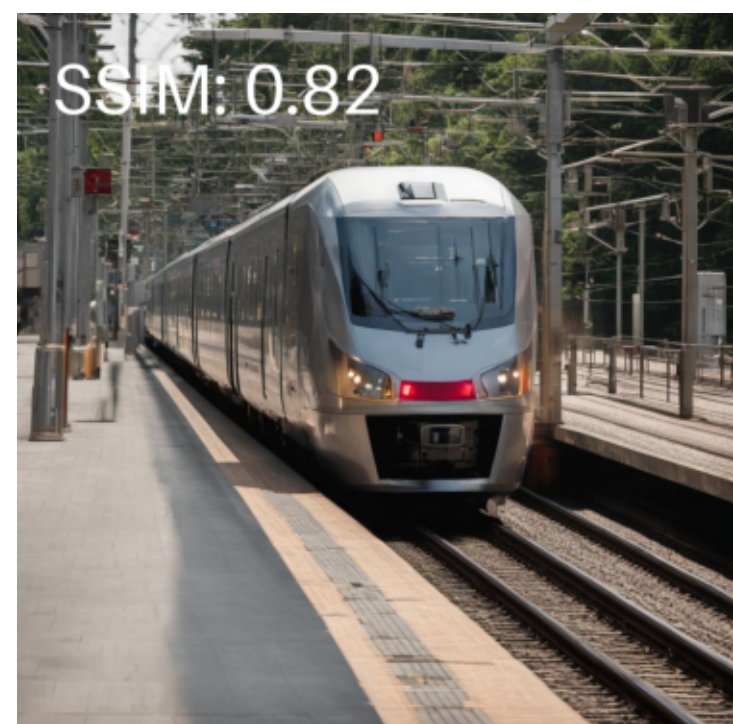

Step 200

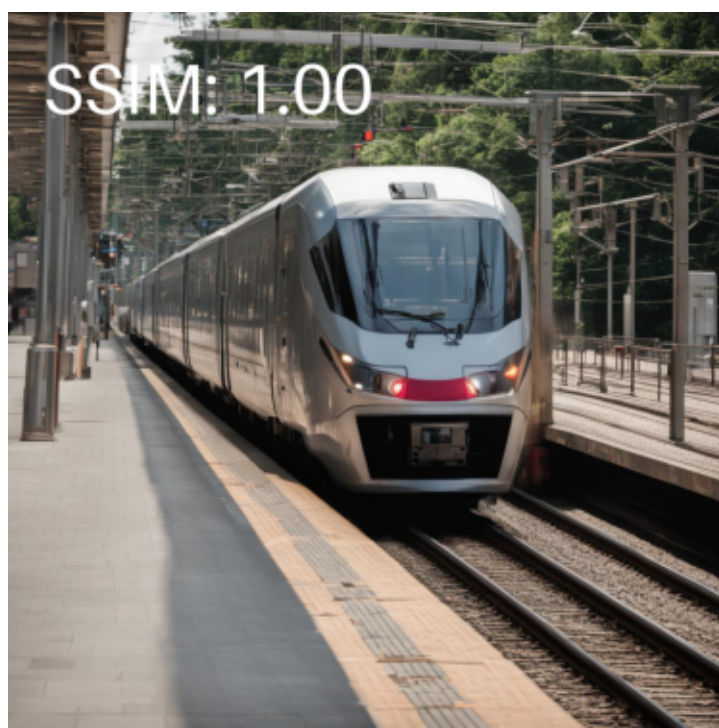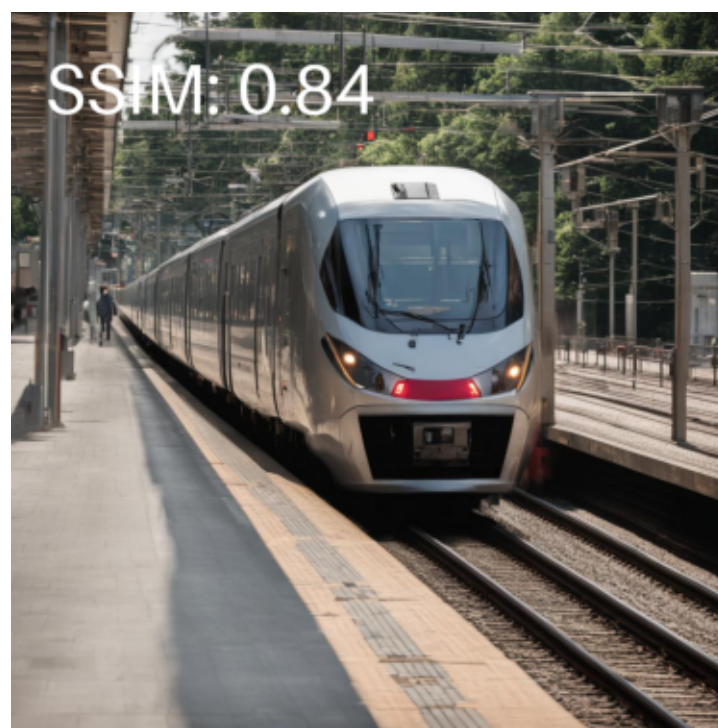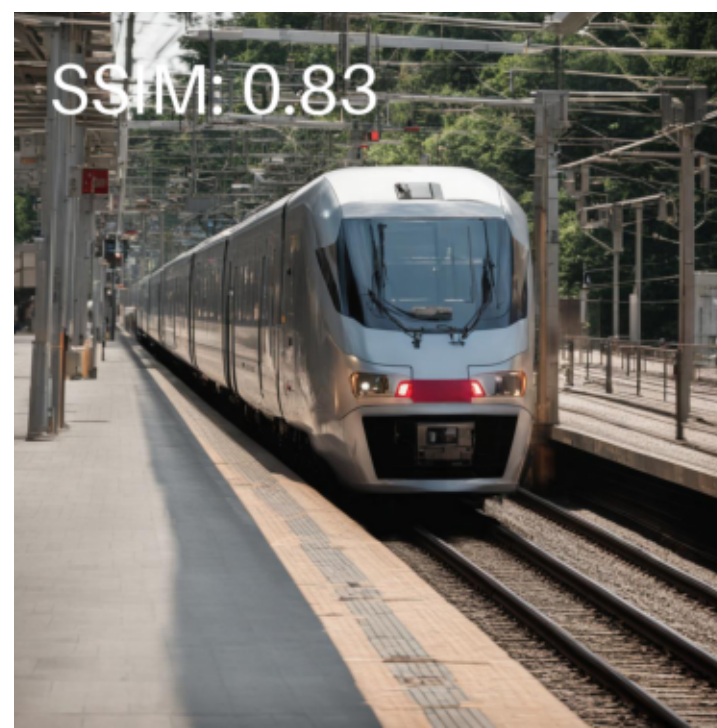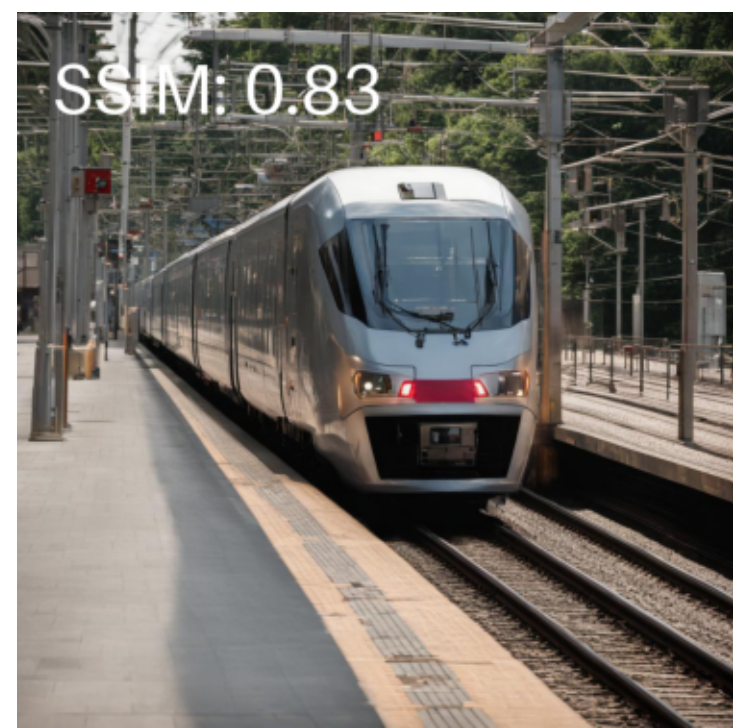



The police officers are sitting together and eating food.

Step 40

FP32

SSIM: 1.00

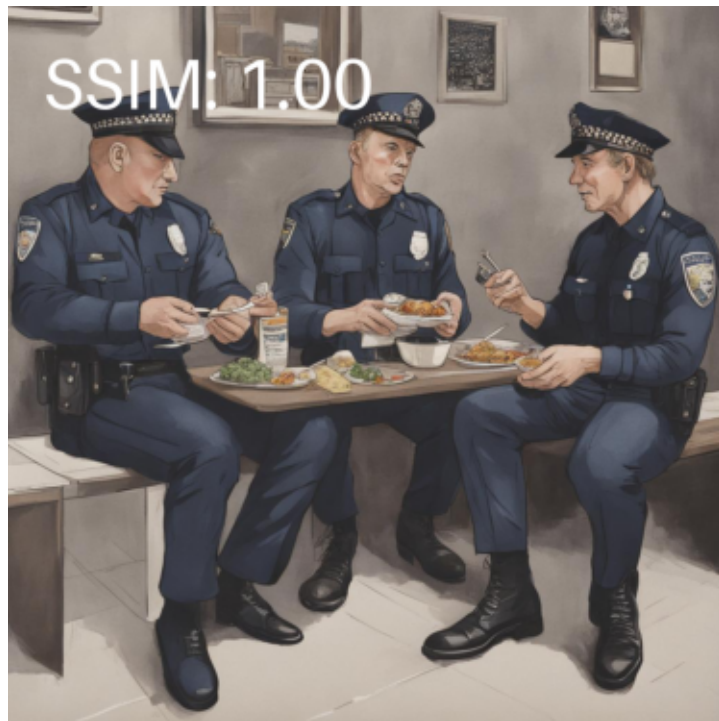

M4E3

SSIM: 0.77

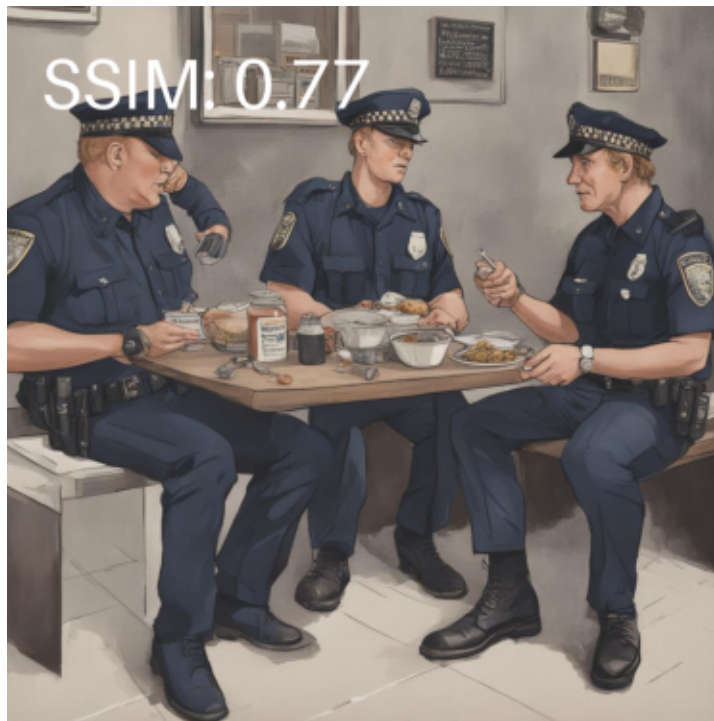

+SR

SSIM: 0.81

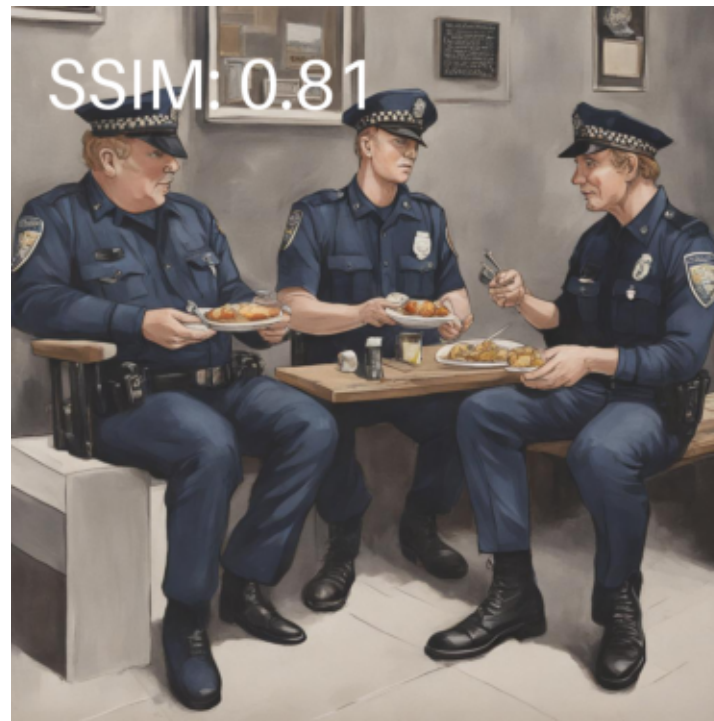

+WSR(p=4)

SSIM: 0.80

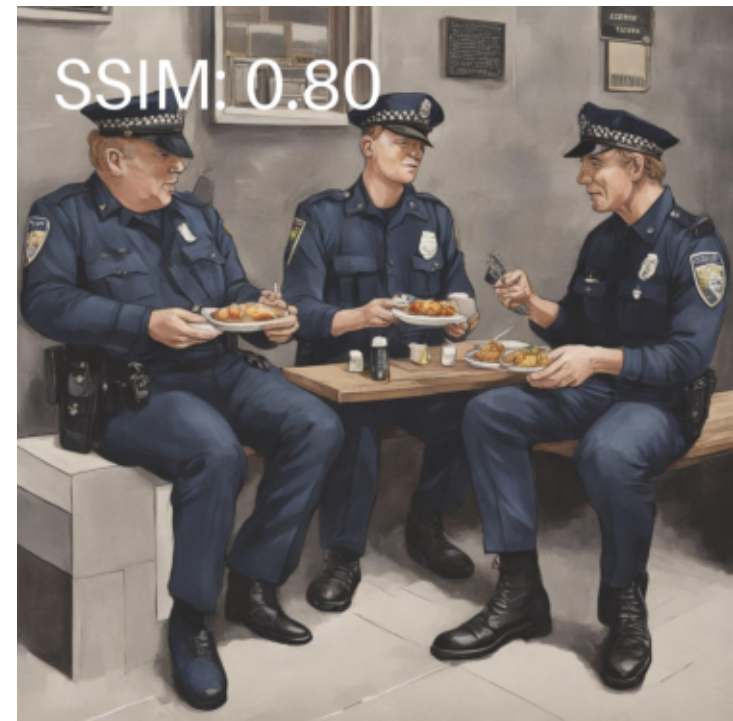

Step 100

SSIM: 1.00

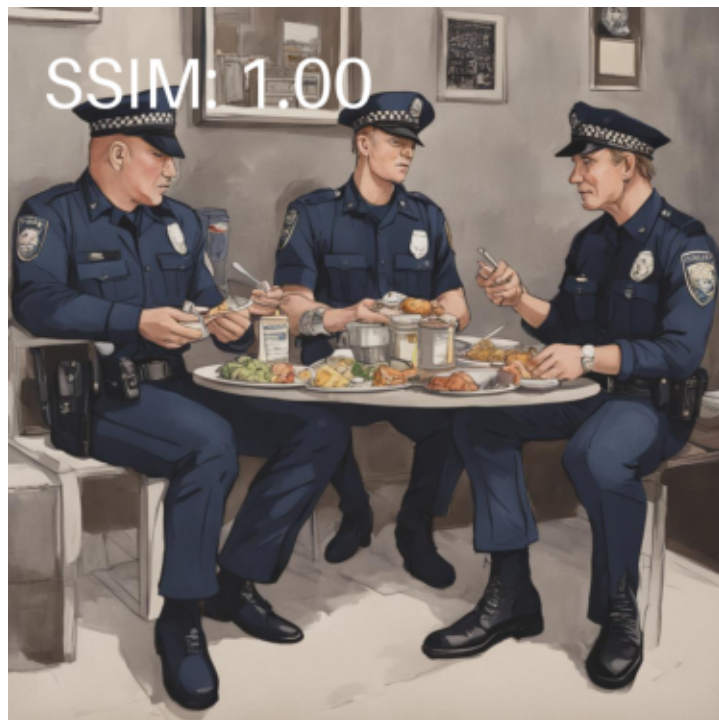

SSIM: 0.76

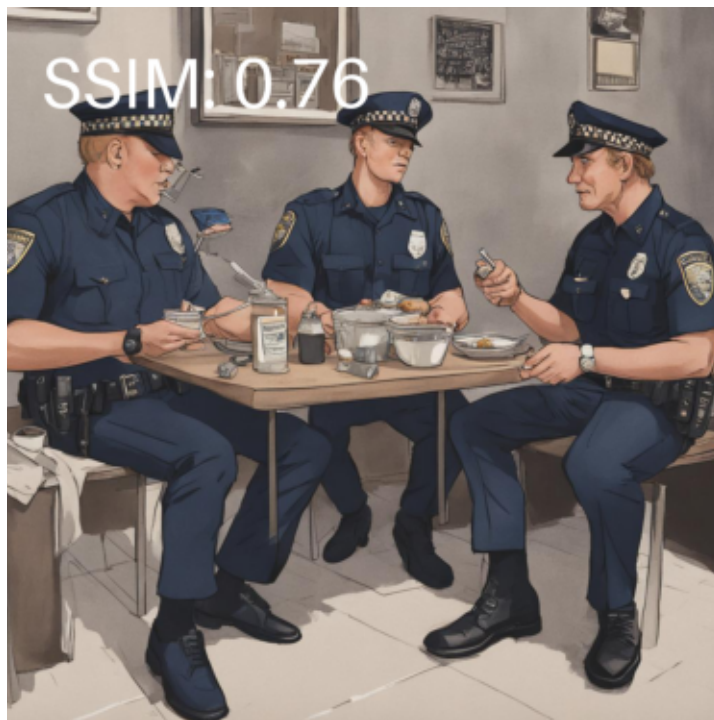

SSIM: 0.77

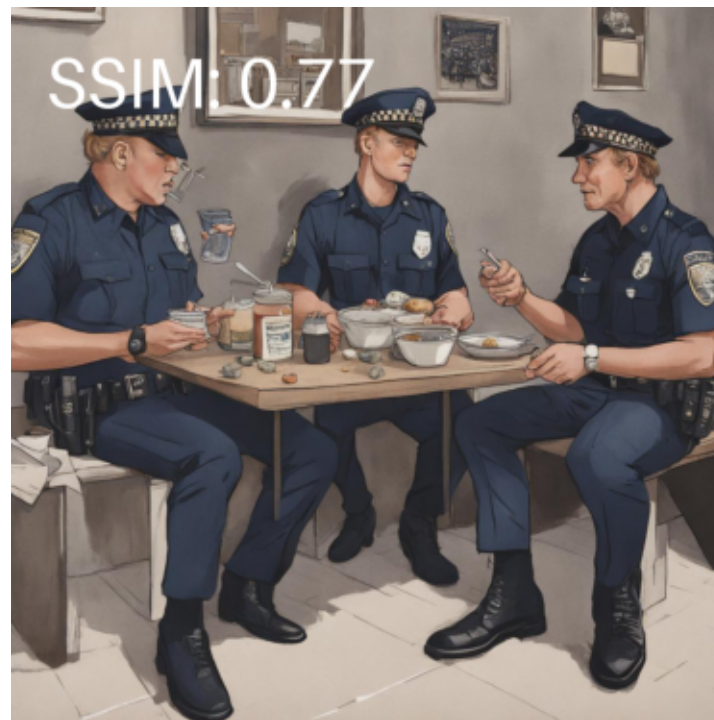

SSIM: 0.84

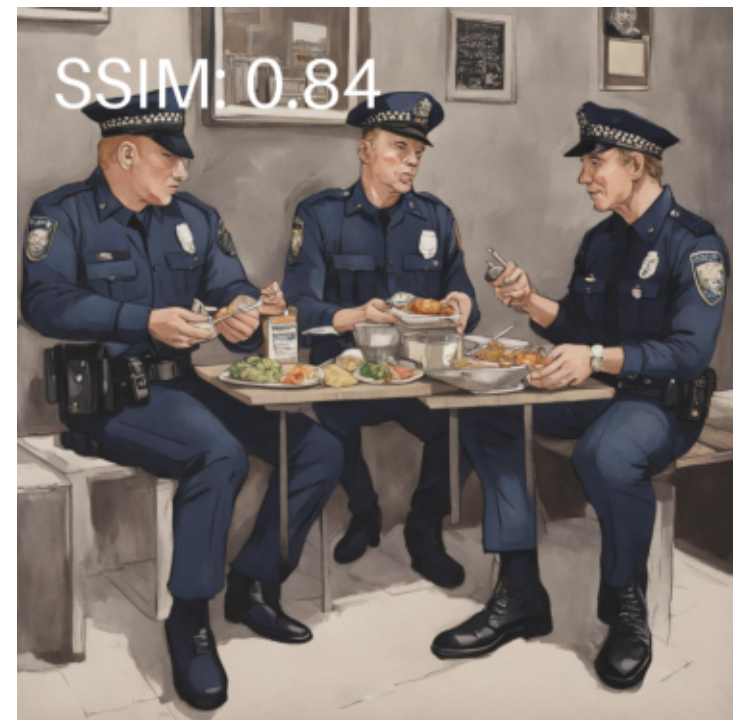

Step 200

SSIM: 1.00

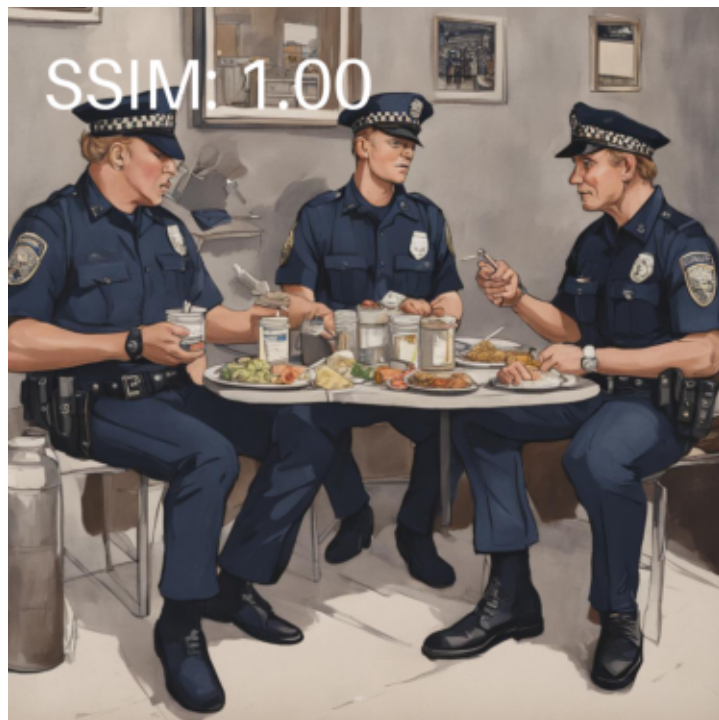

SSIM: 0.80

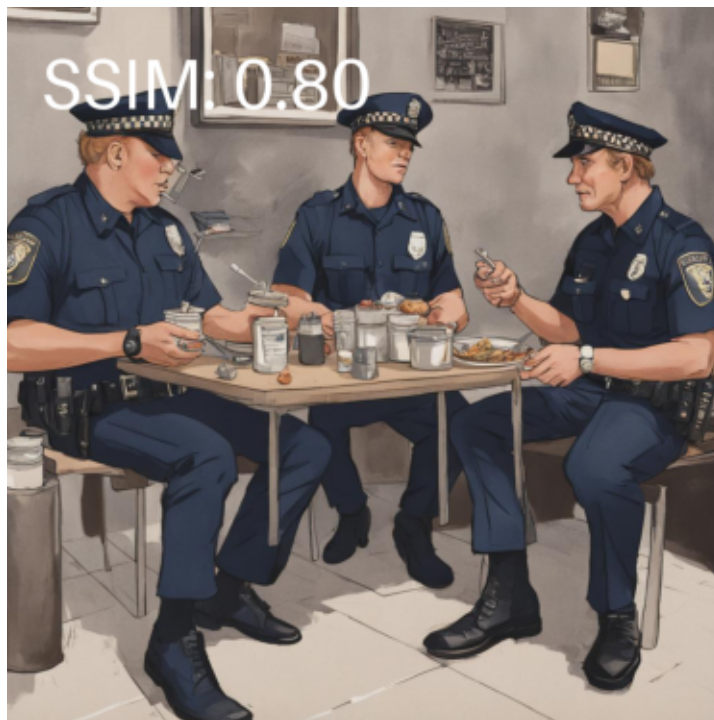

SSIM: 0.78

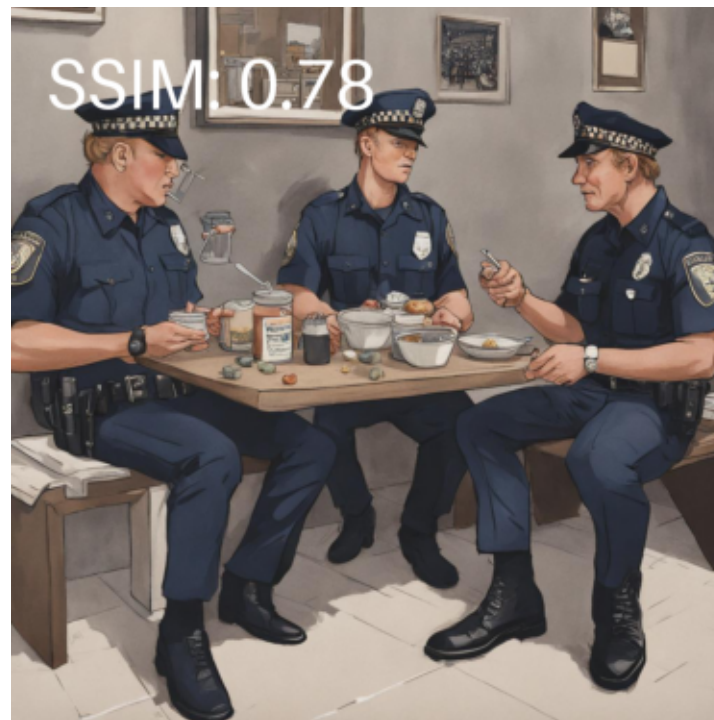

SSIM: 0.89

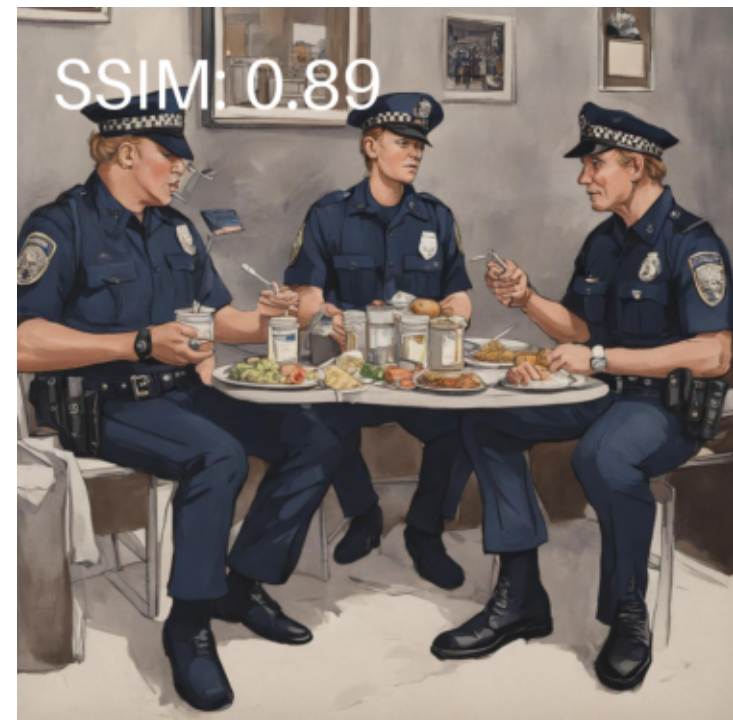



A laptop and a cell phone on a table.

Step 40

FP32

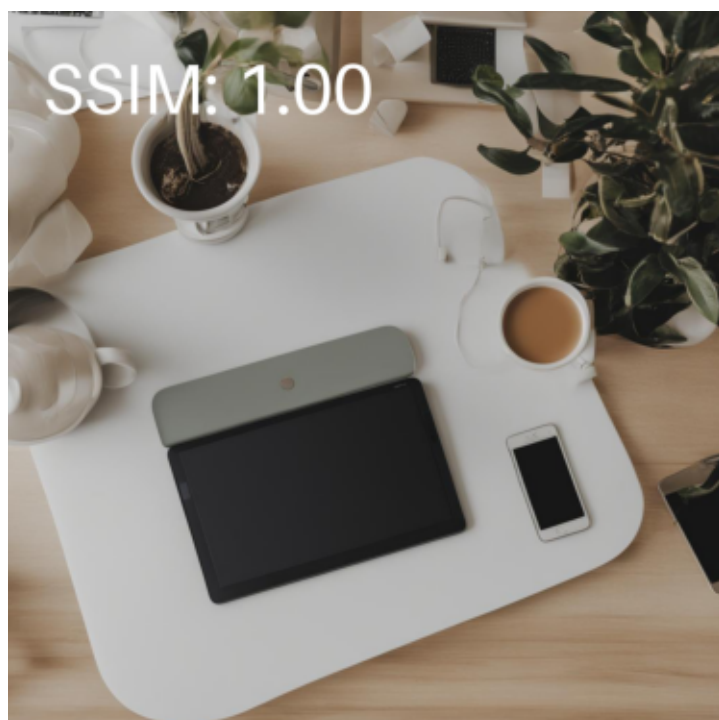

M4E3

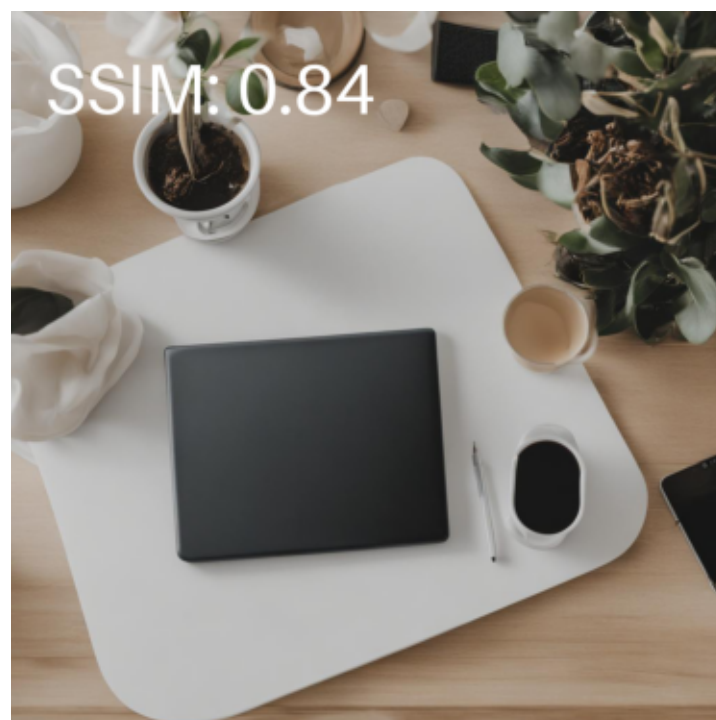

+SR

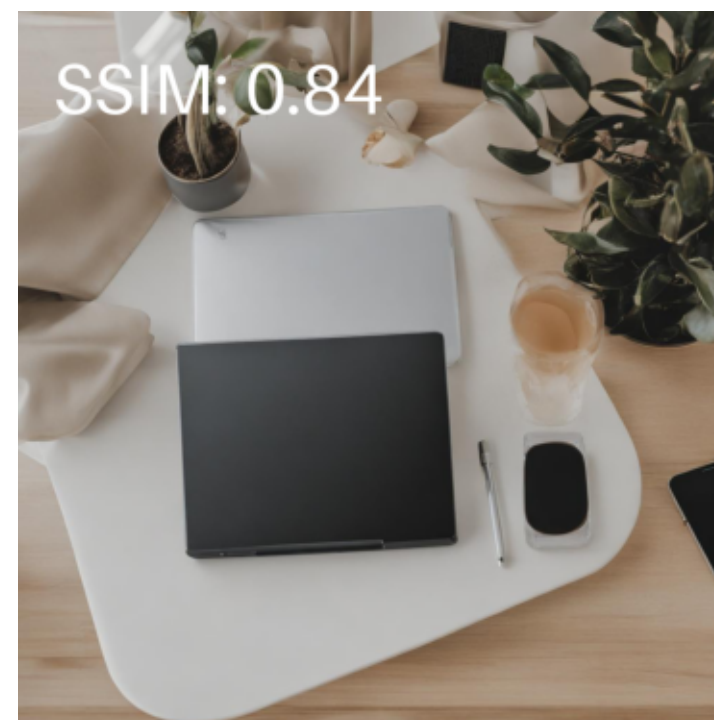

+WSR(p=4)

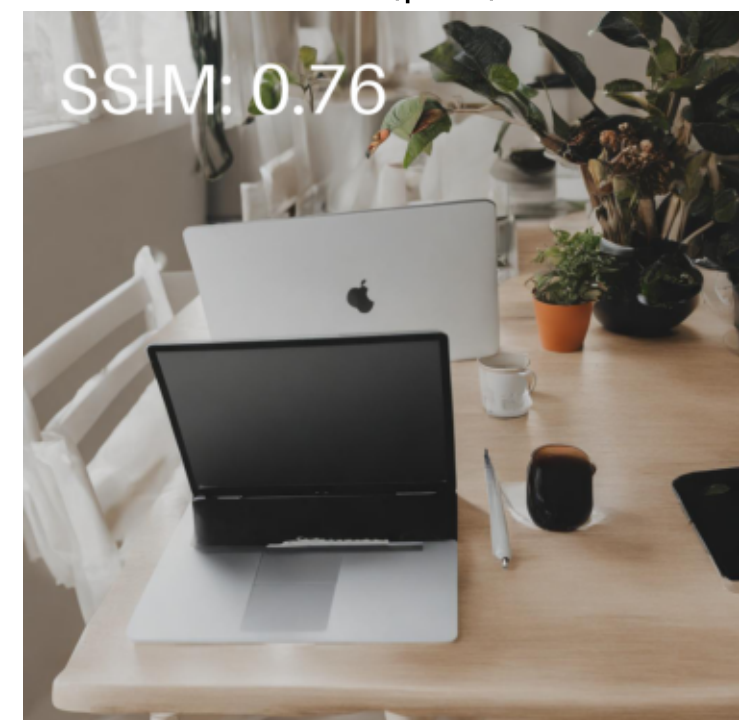

Step 100

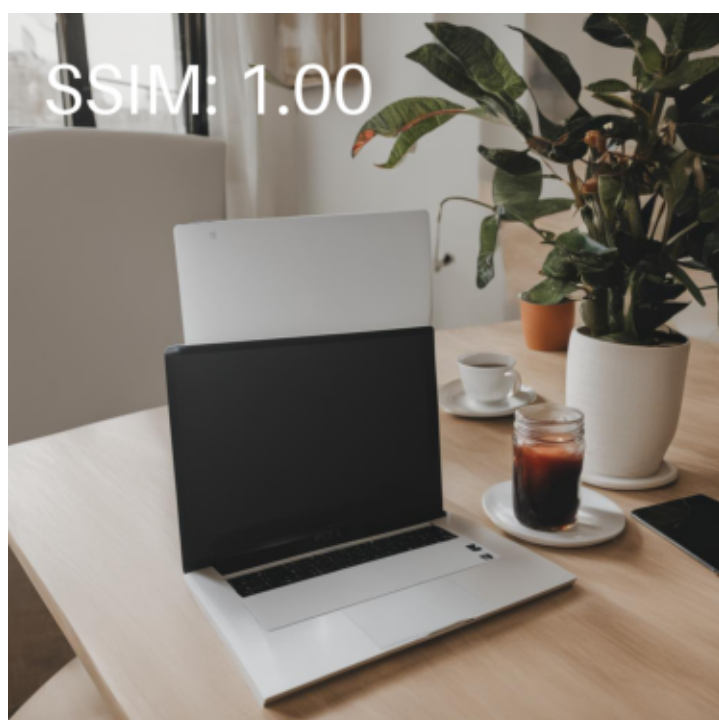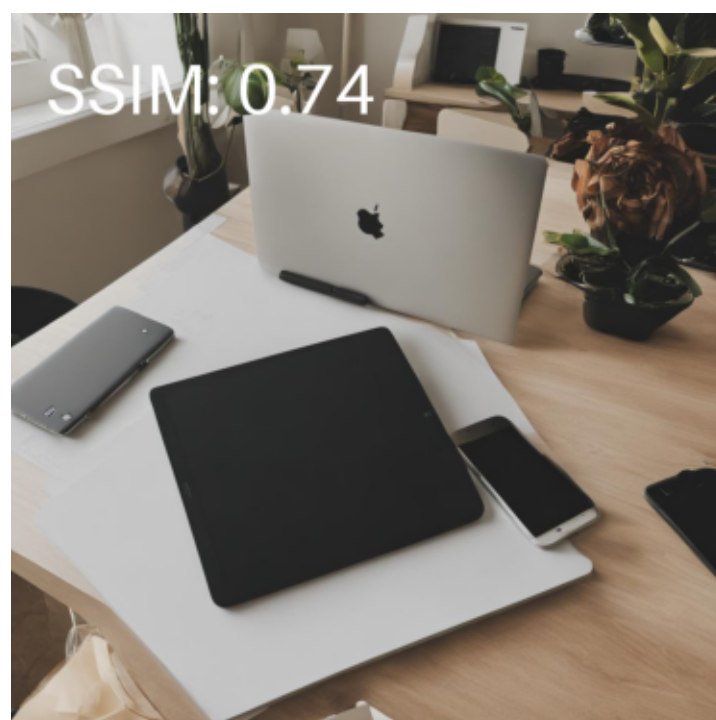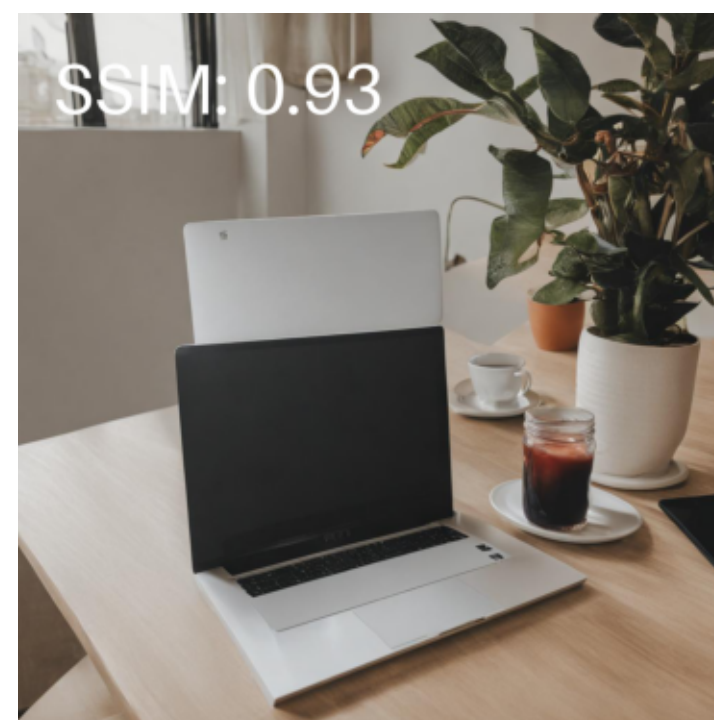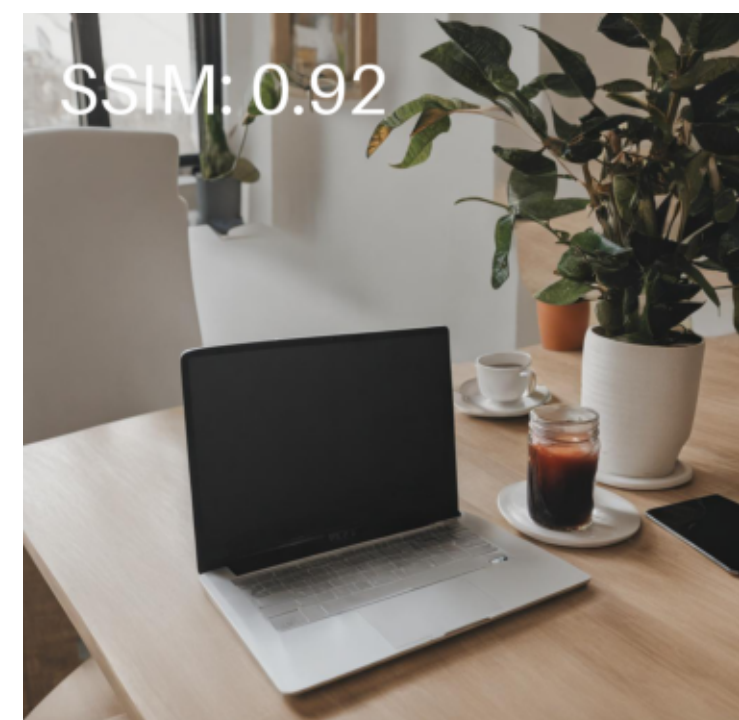

Step 200

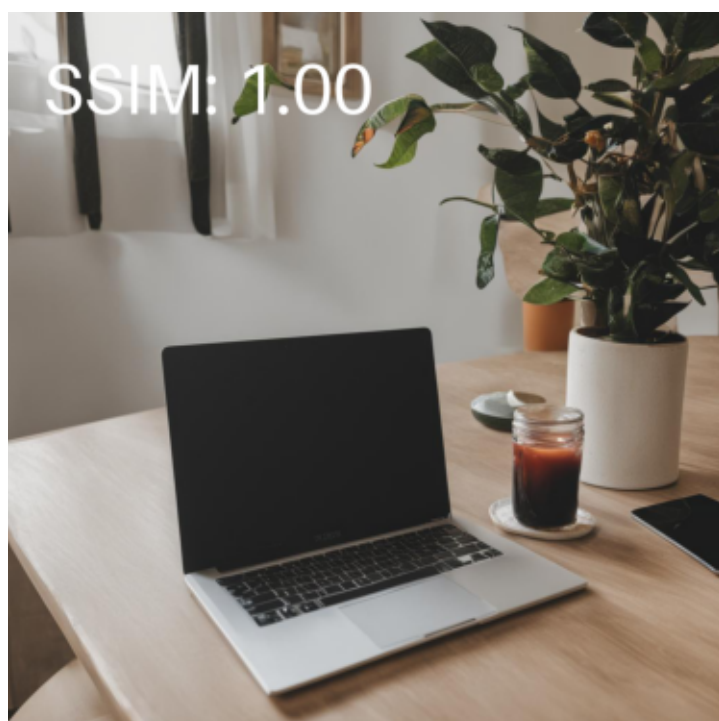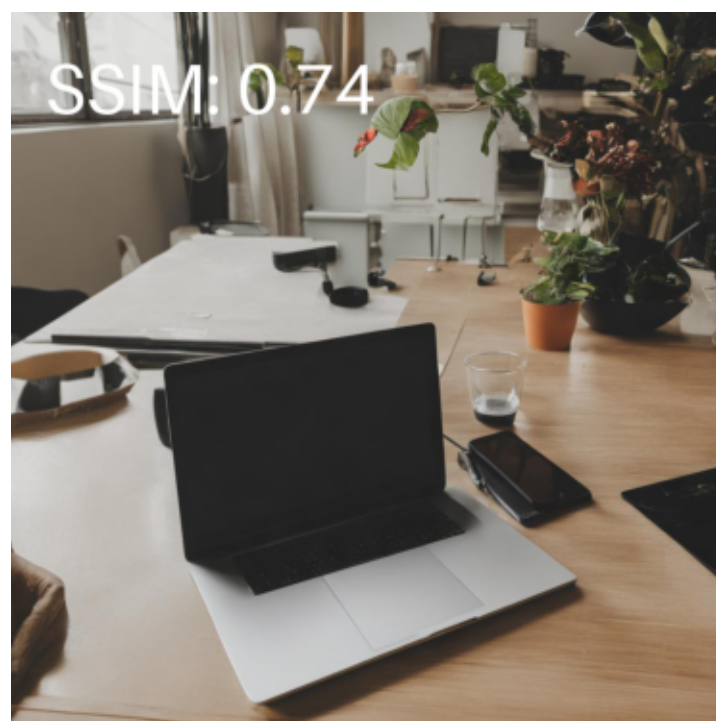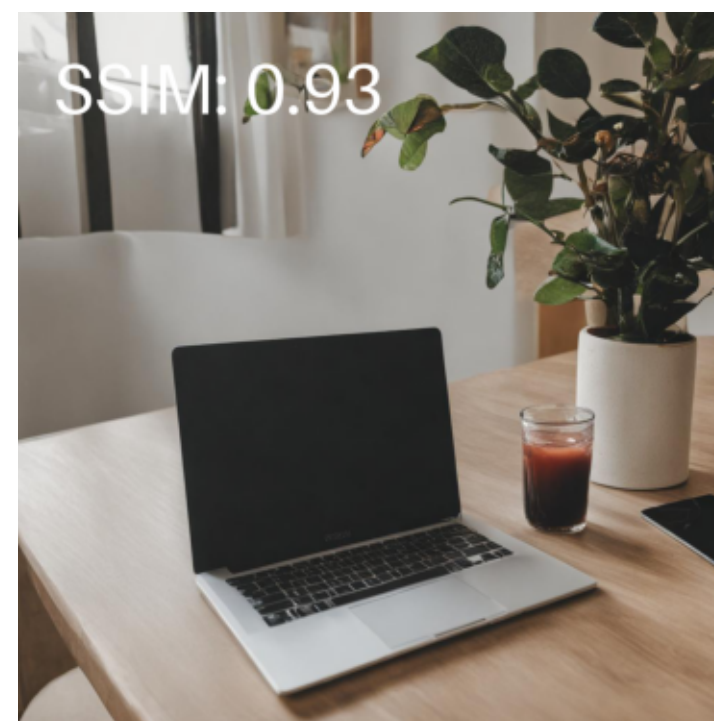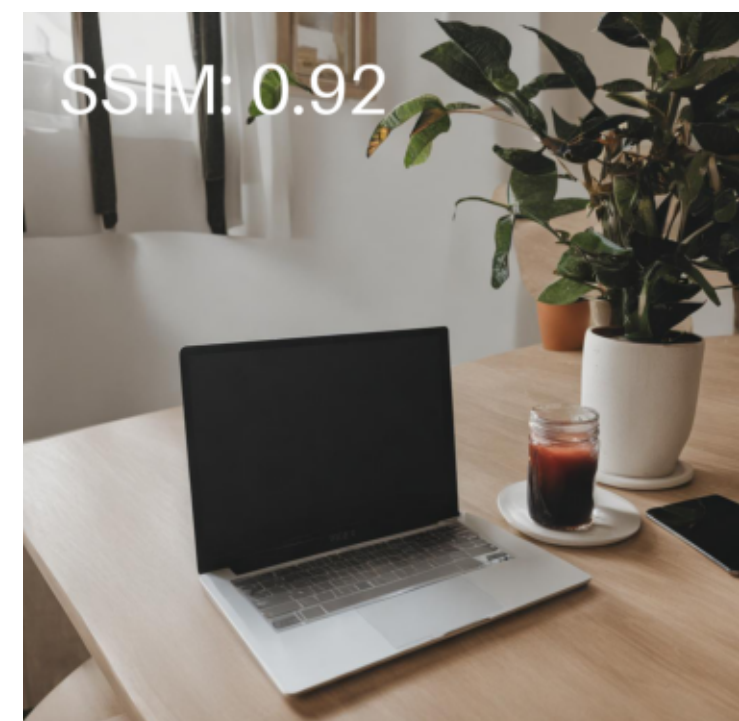



A black dog in a bathroom drinking out of the toilet.

Step 40

FP32

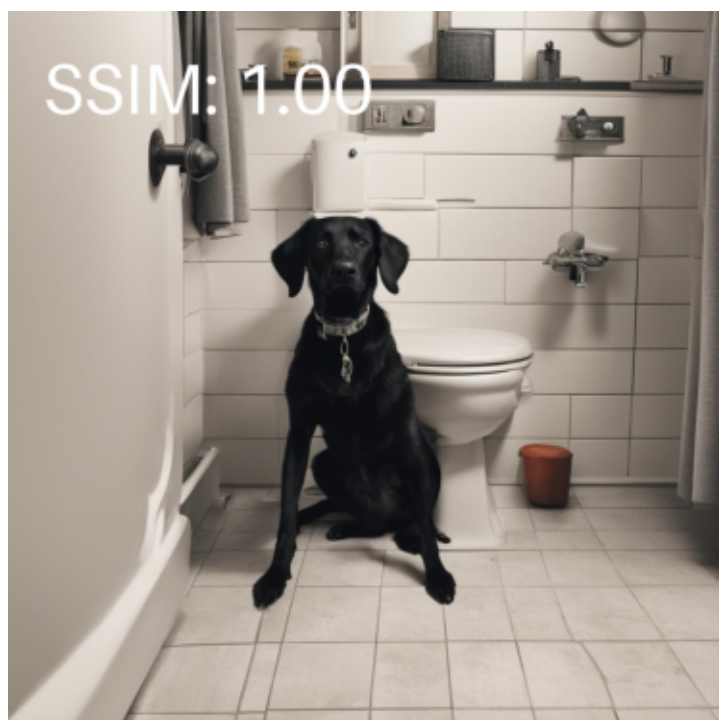

M4E3

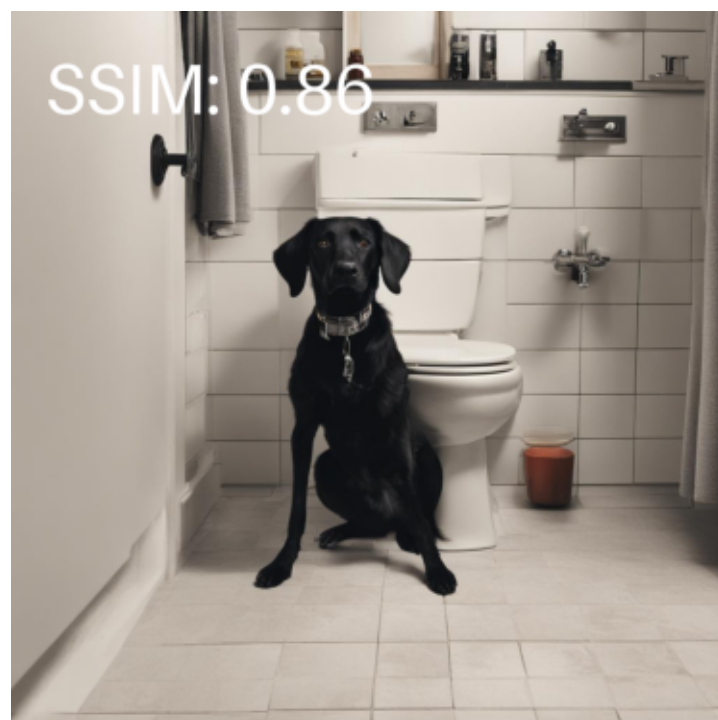

+SR

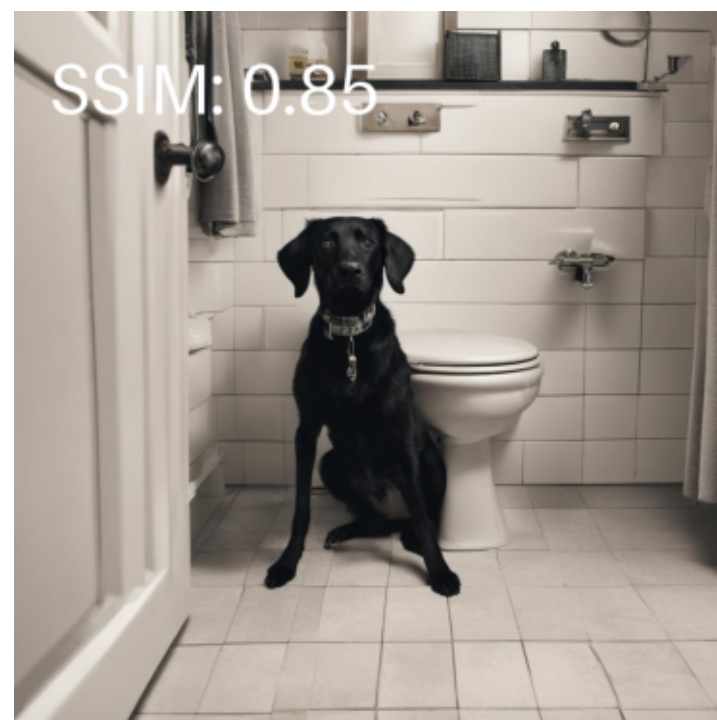

+WSR(p=4)

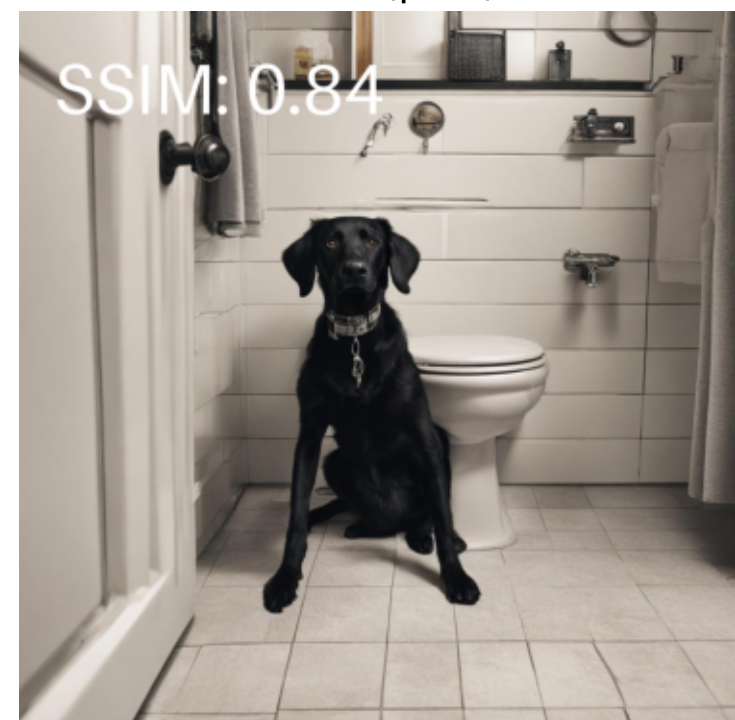

Step 100

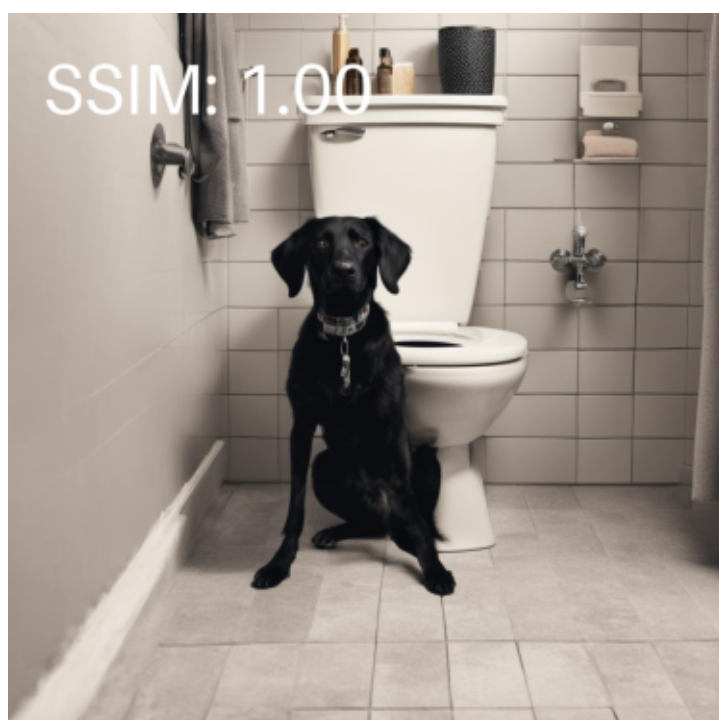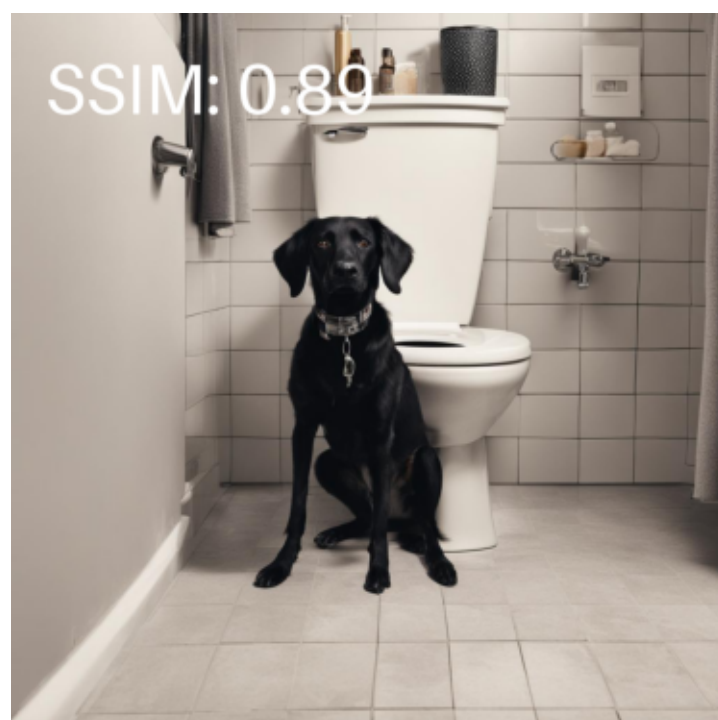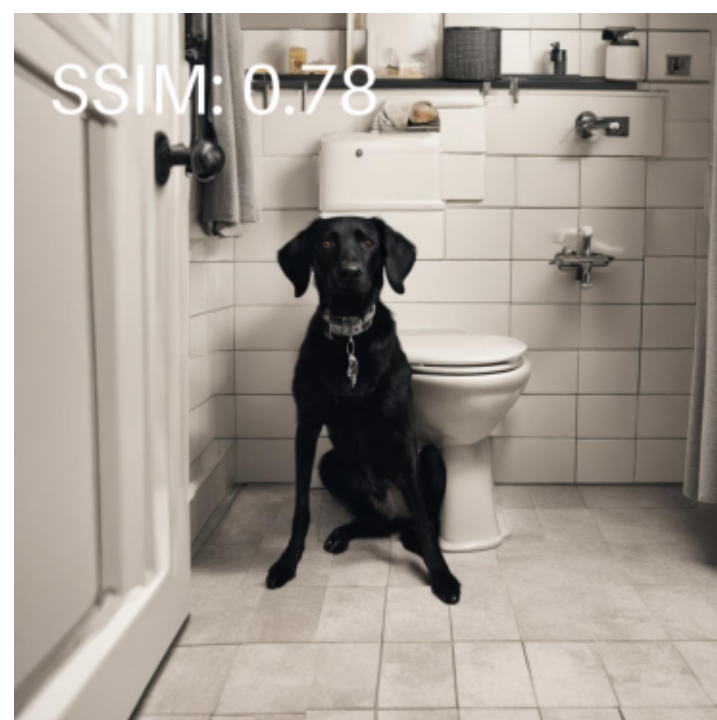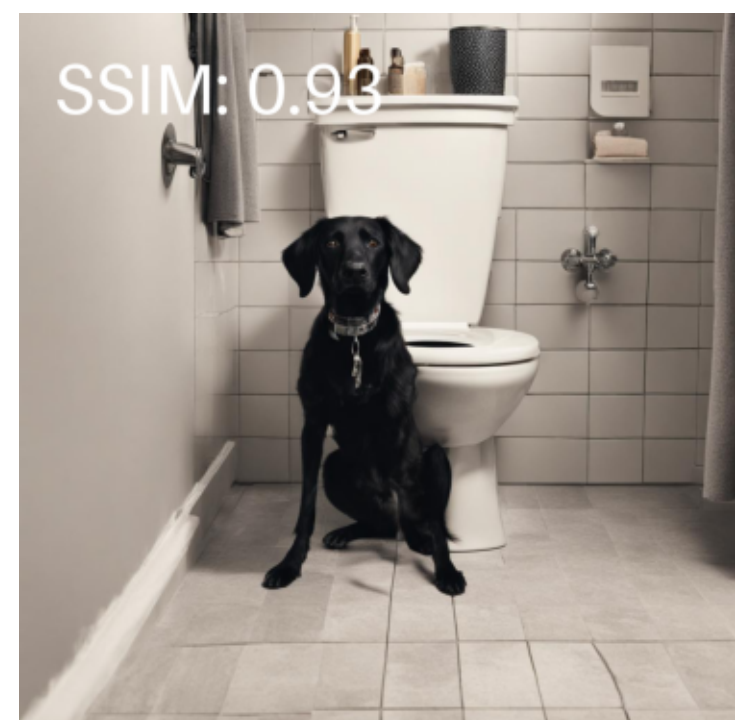

Step 200

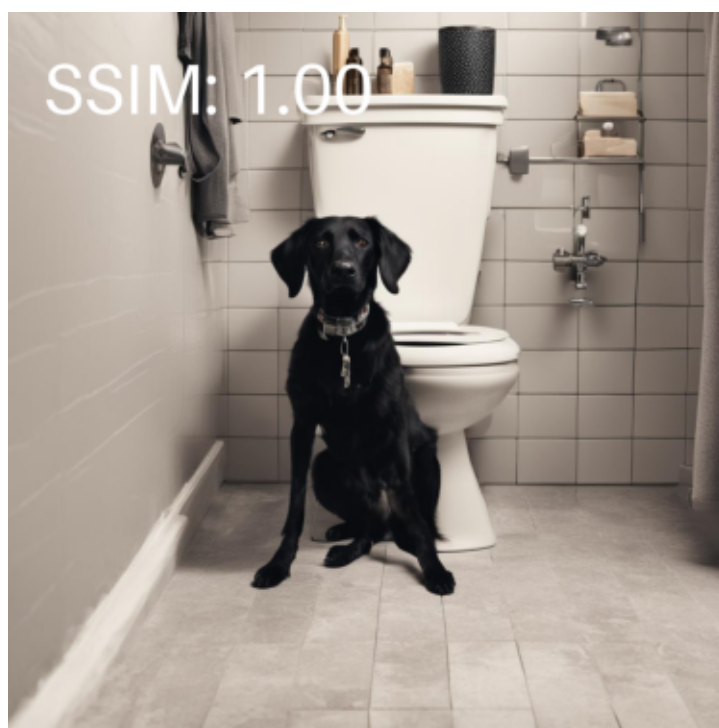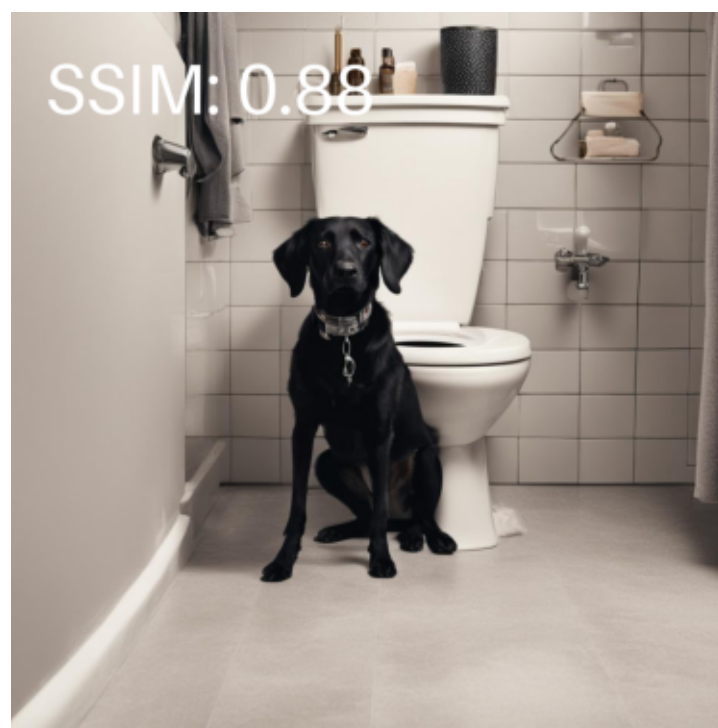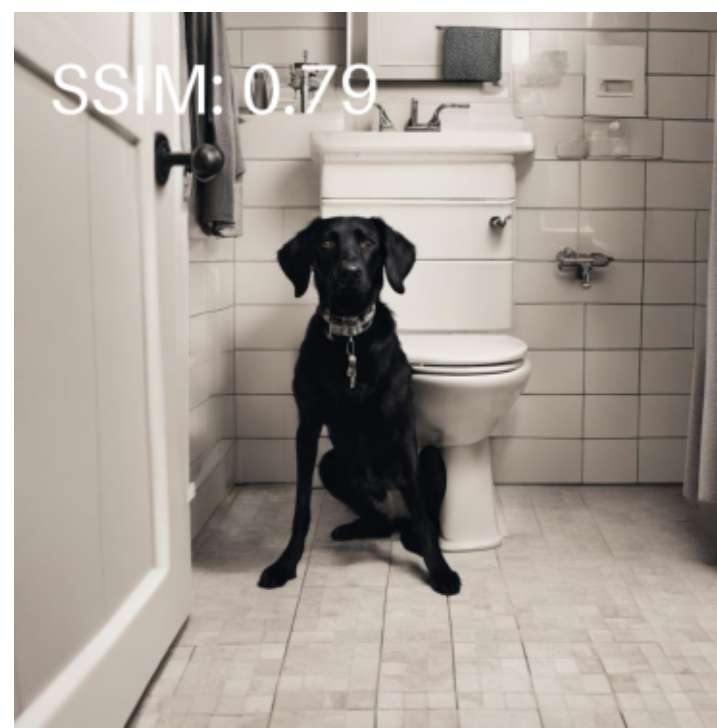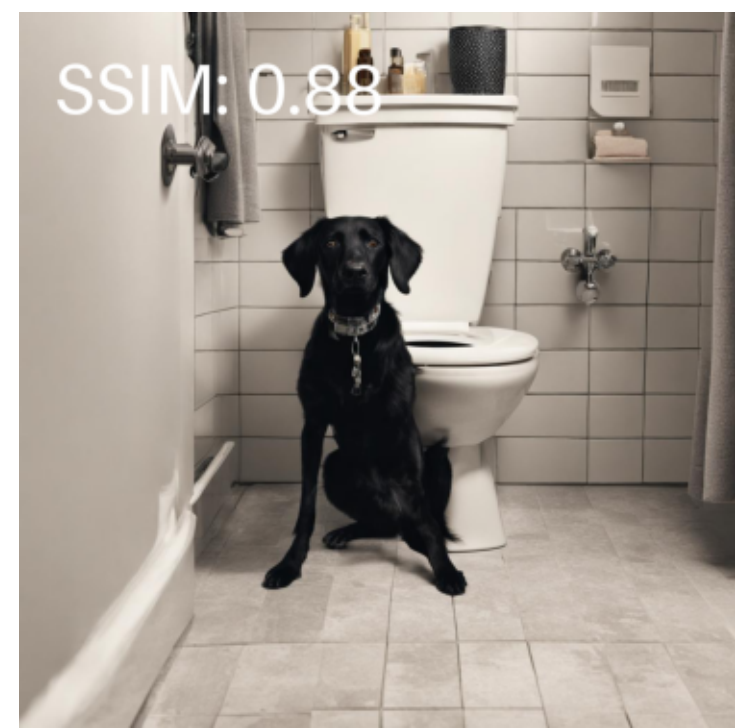



Three people on horse back at a rural road intersection.

Step 40

FP32

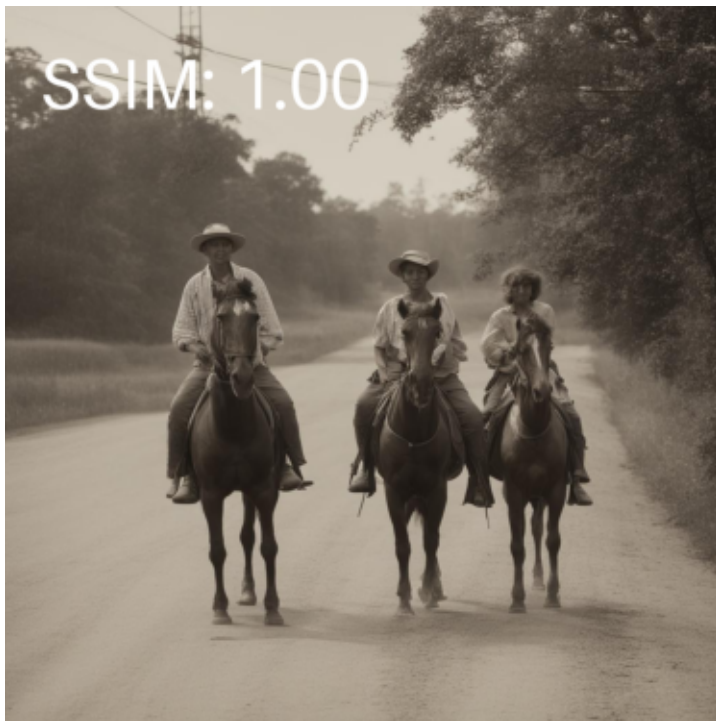

M4E3

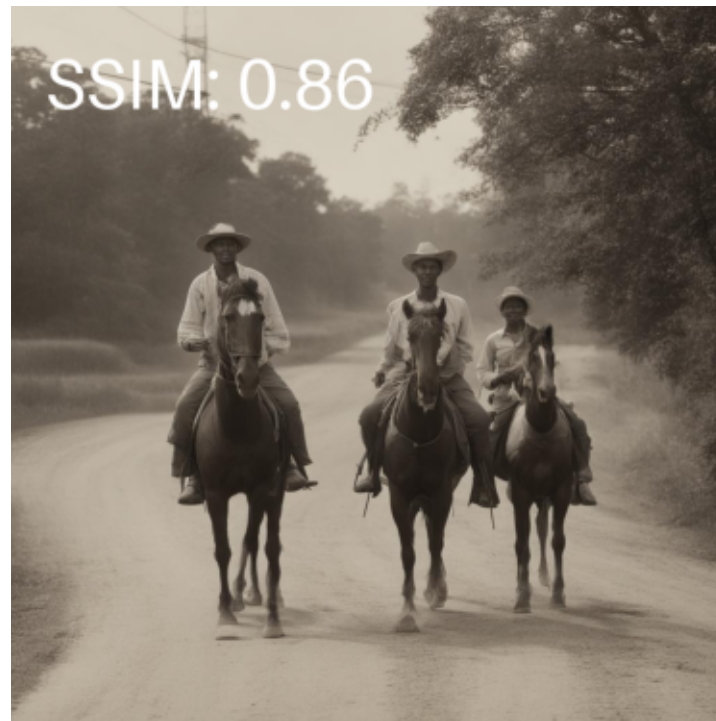

+SR

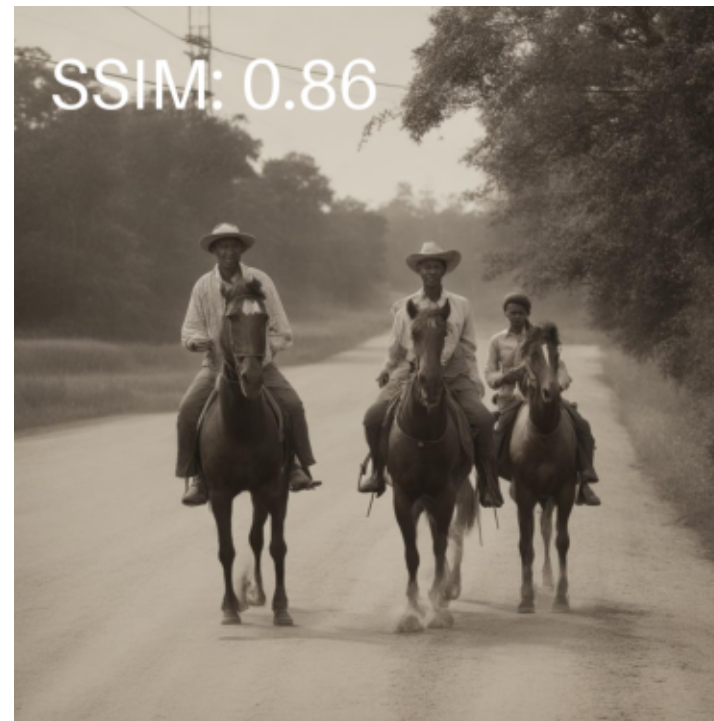

+WSR(p=4)

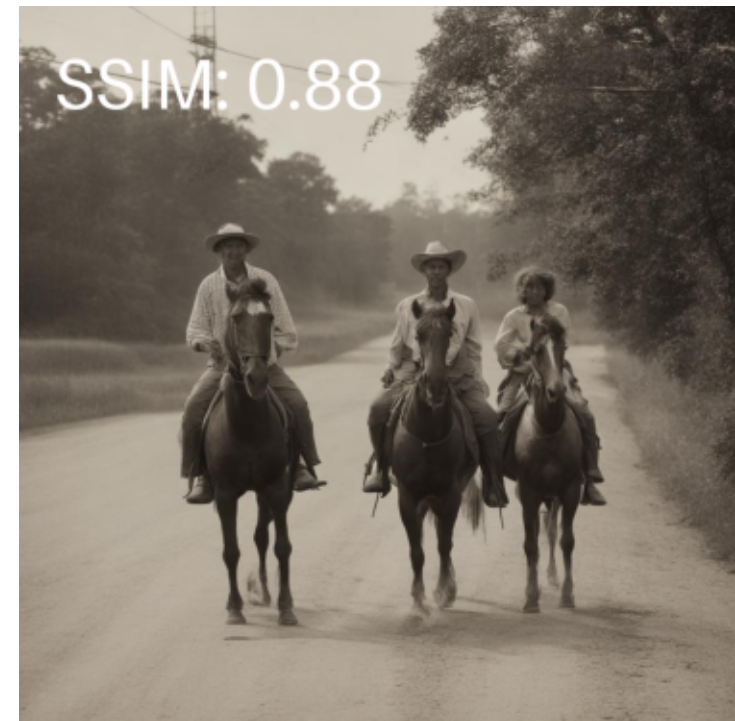

Step 100

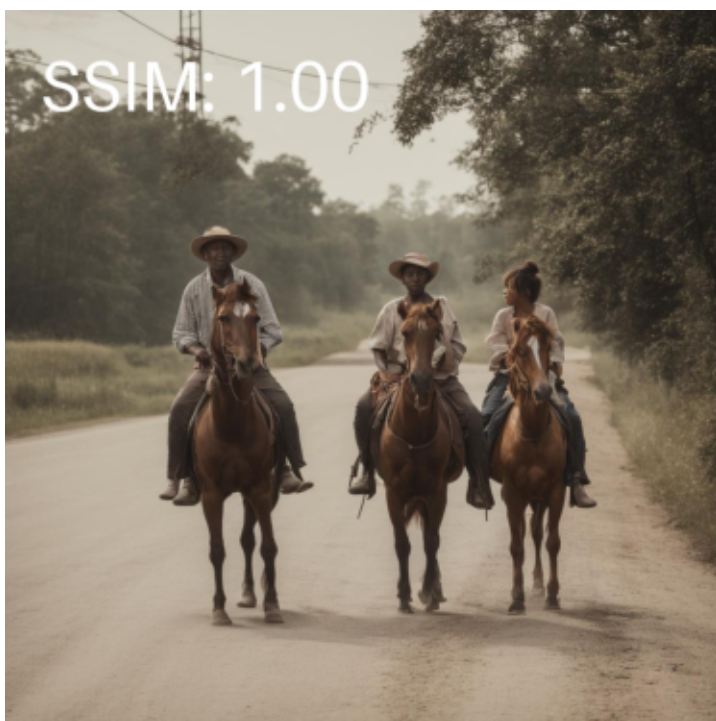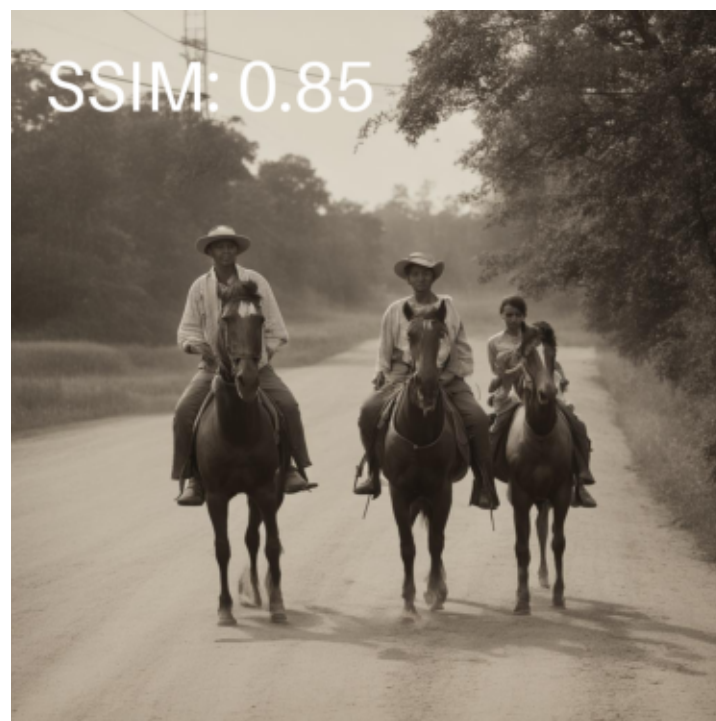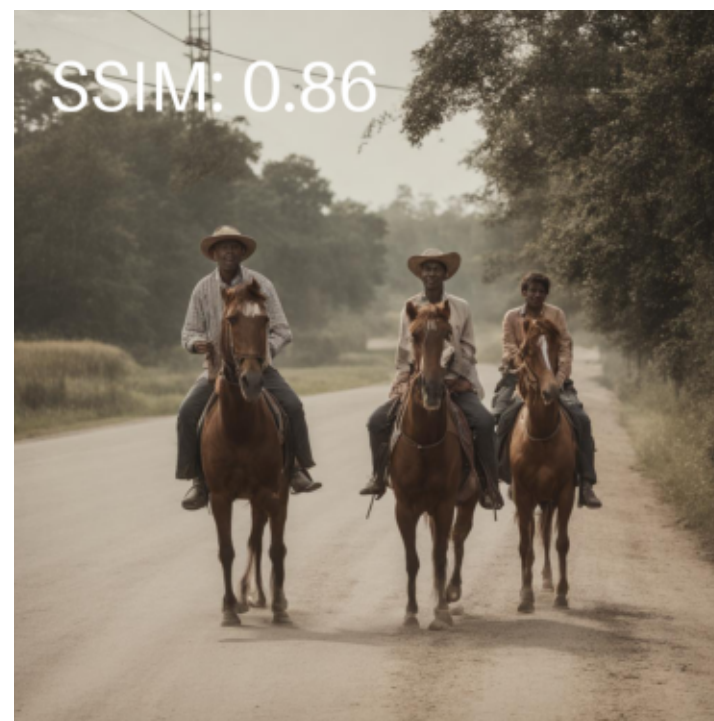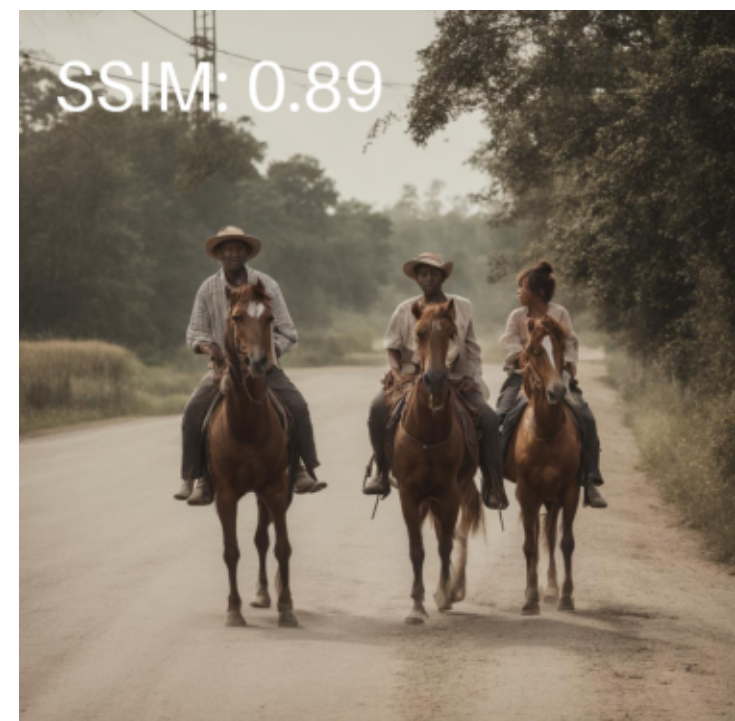

Step 200

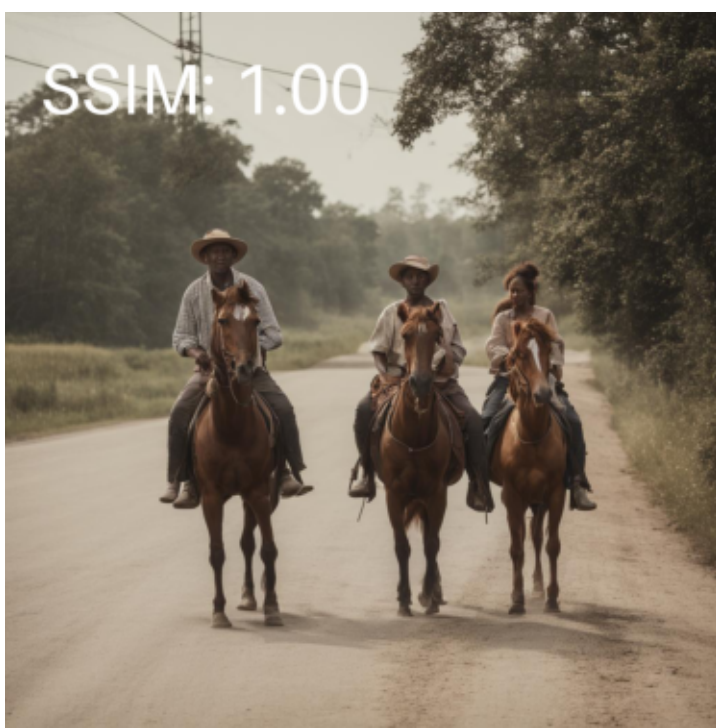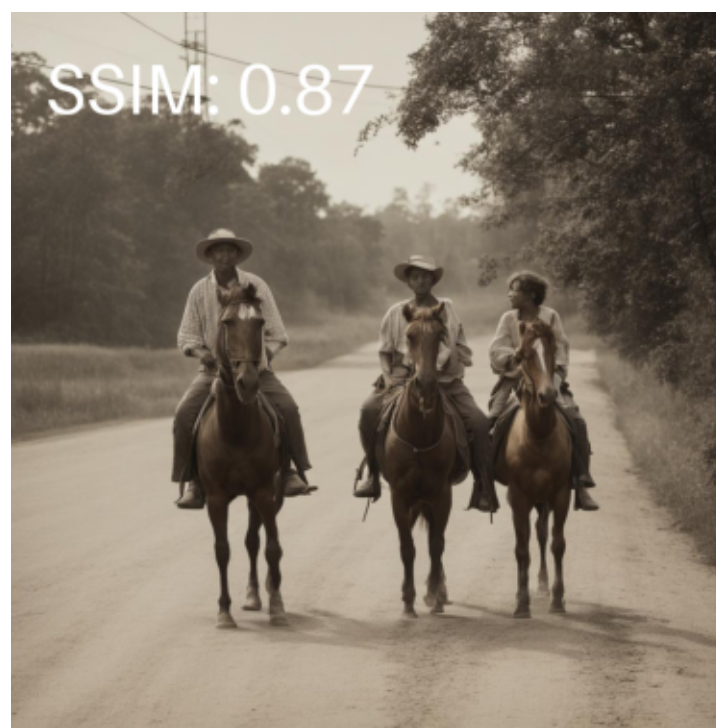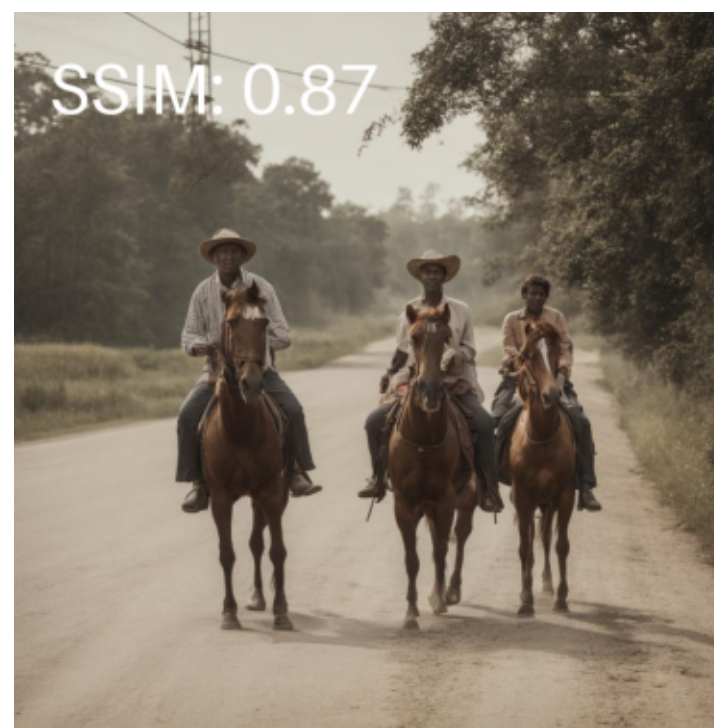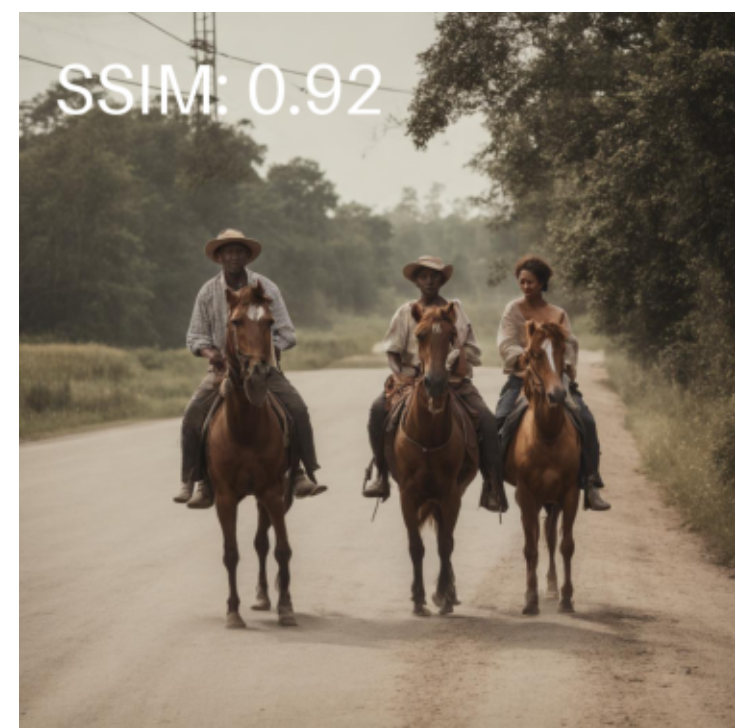



An old car in a parking lot with a surfboard strapped to the top

Step 40

FP32

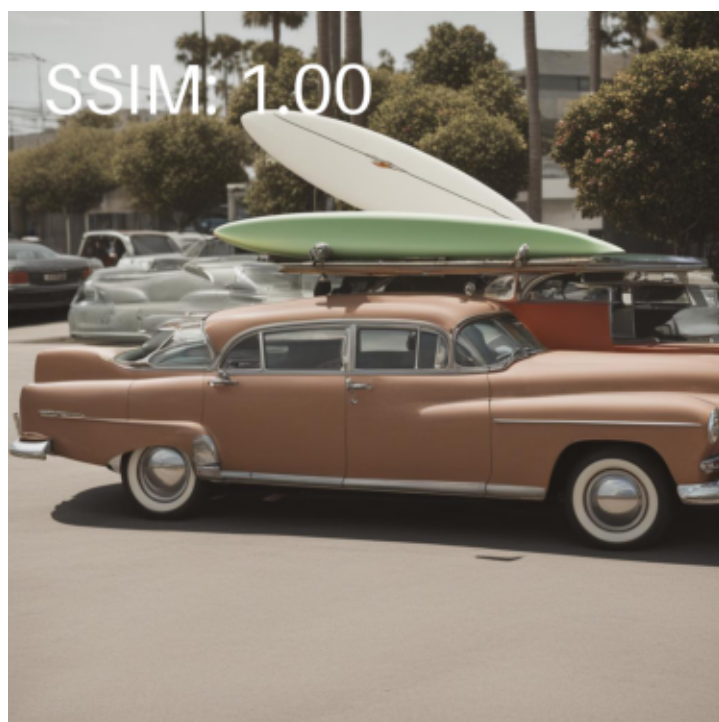

M4E3

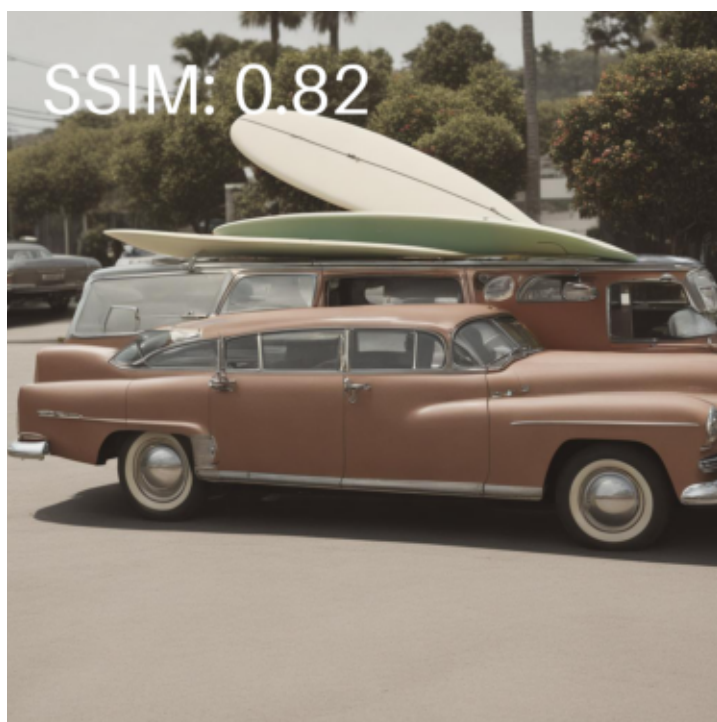

+SR

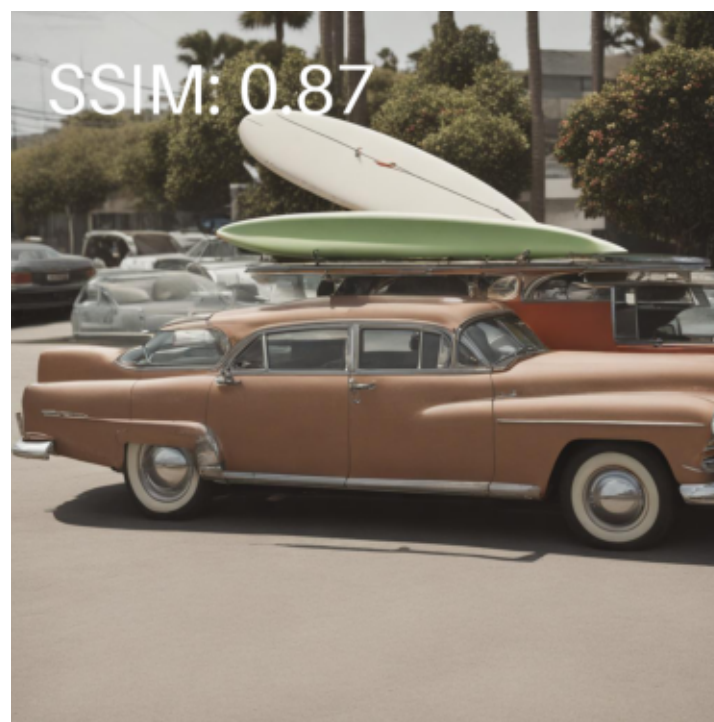

+WSR(p=4)

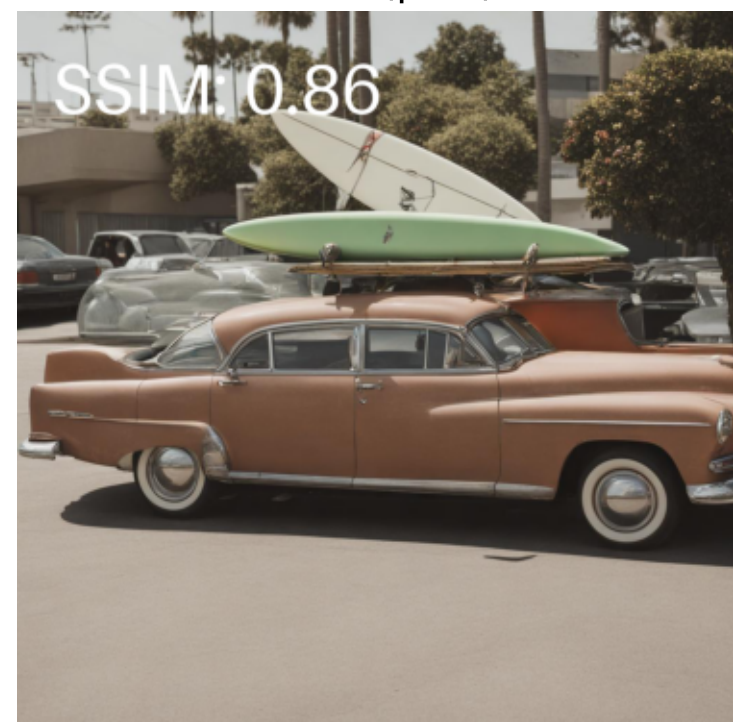

Step 100

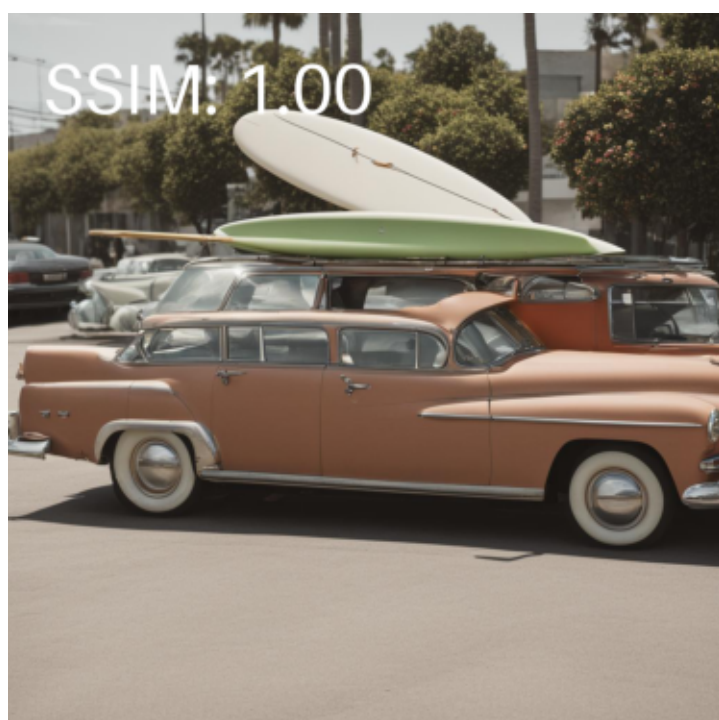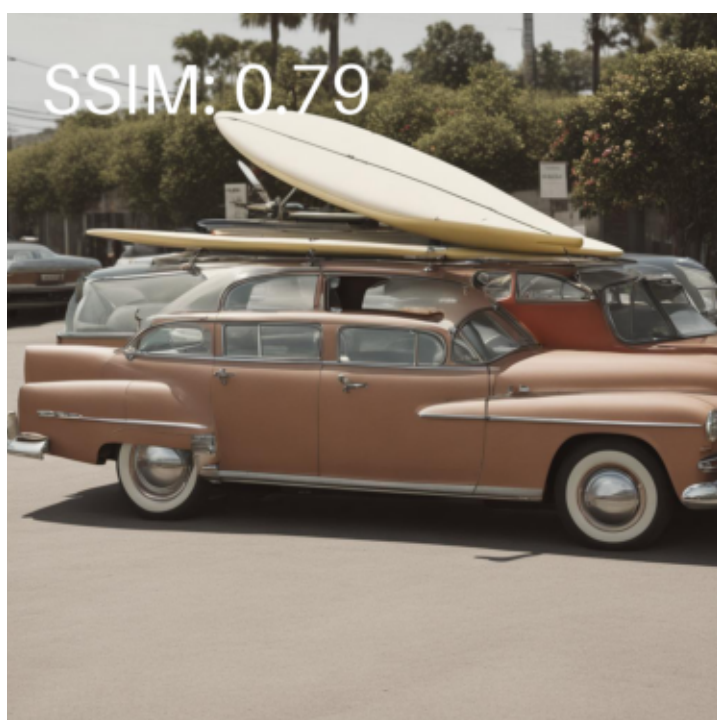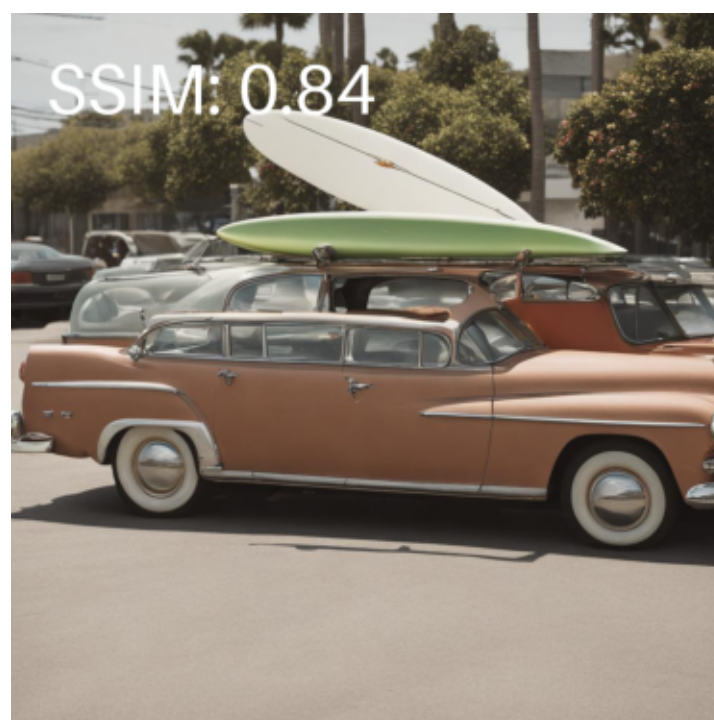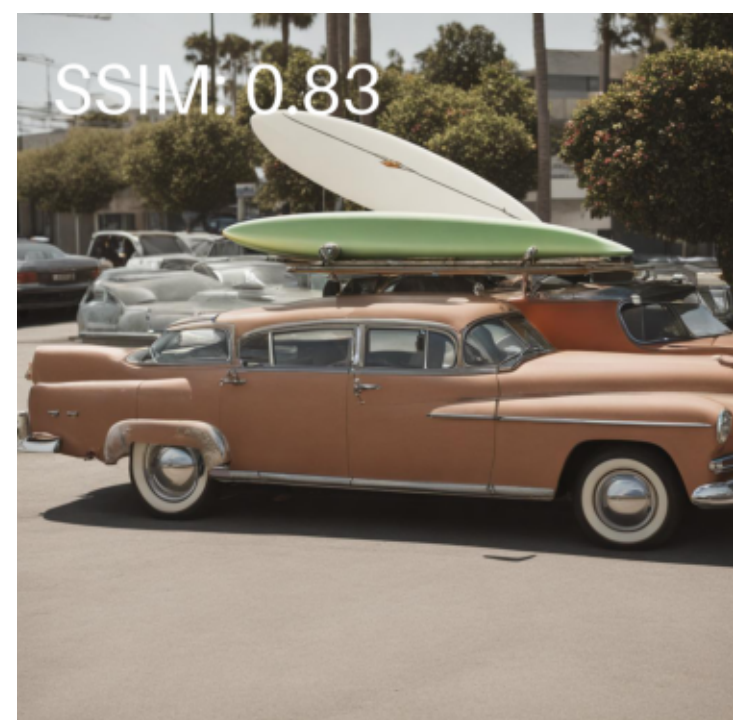

Step 200

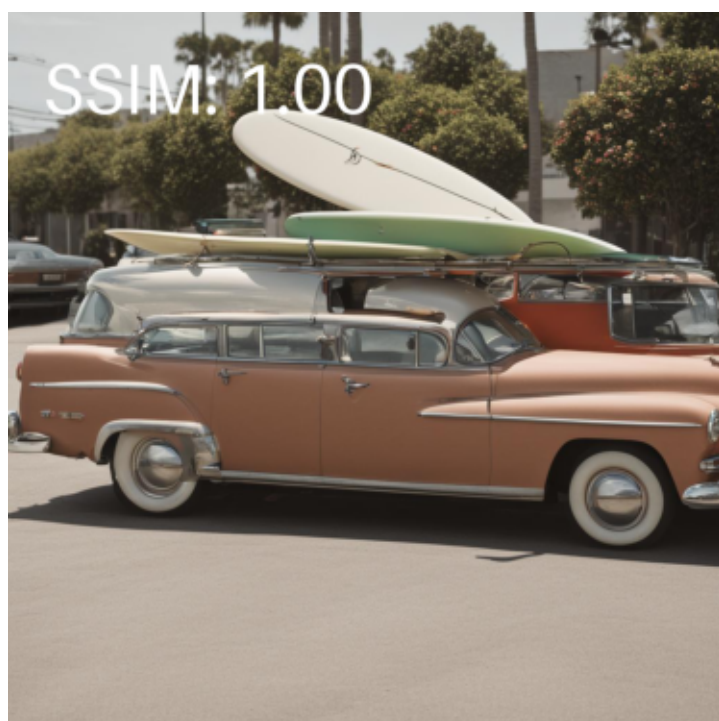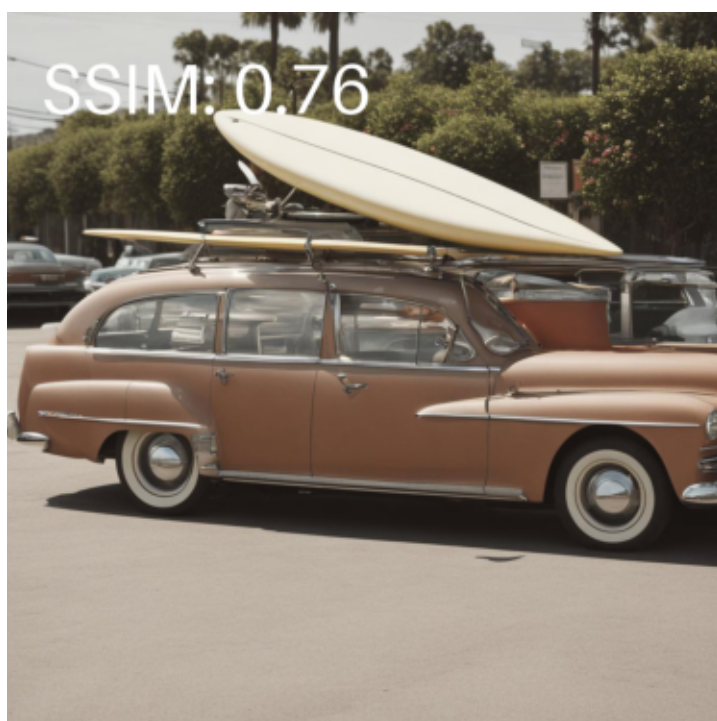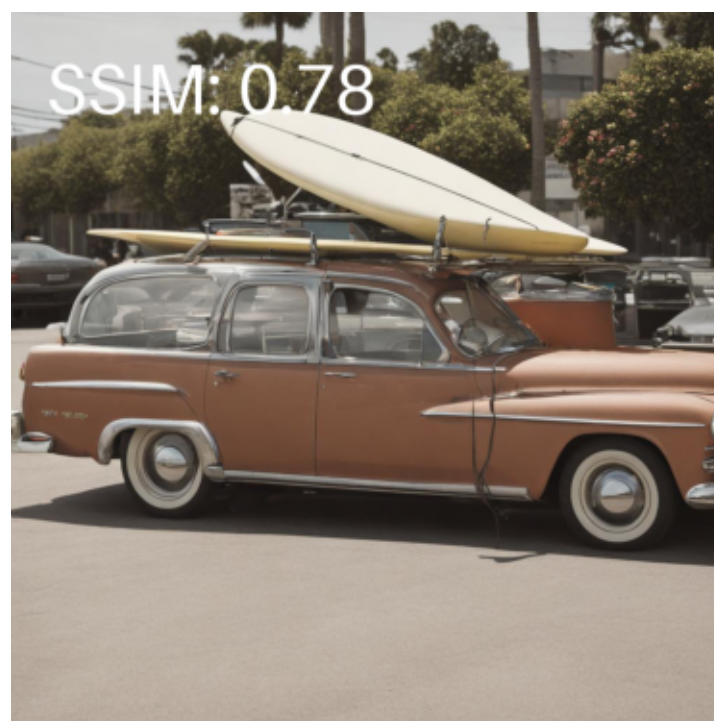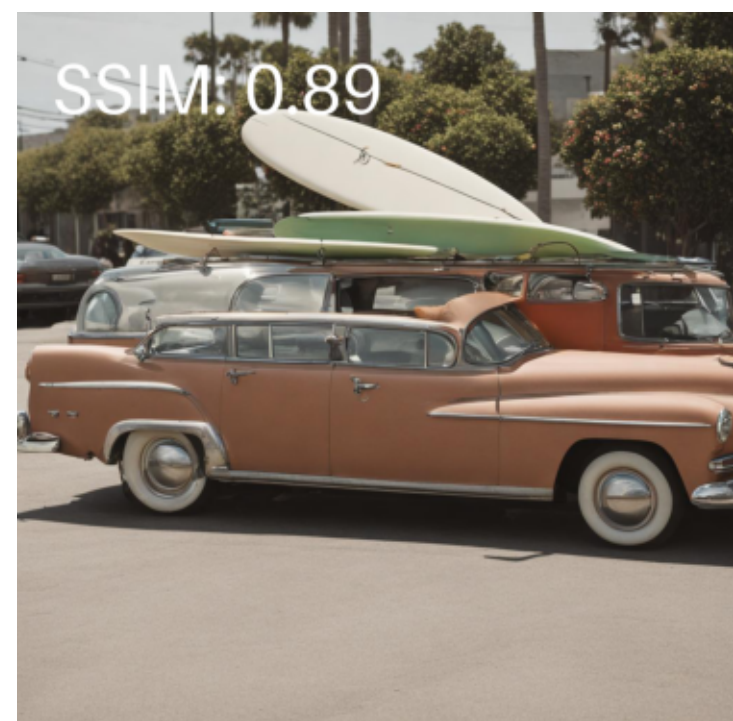



a silver fridge sits in a room next to a microwave

FP32

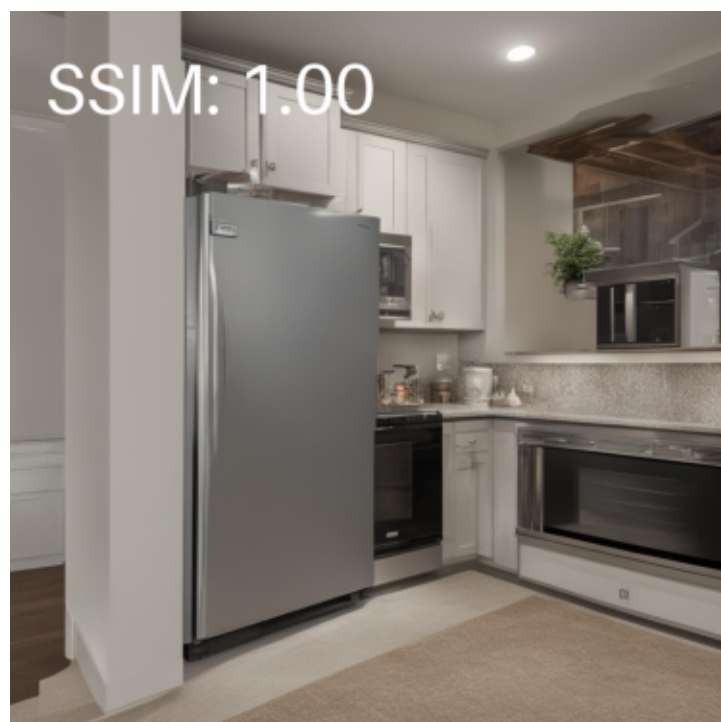

M4E3

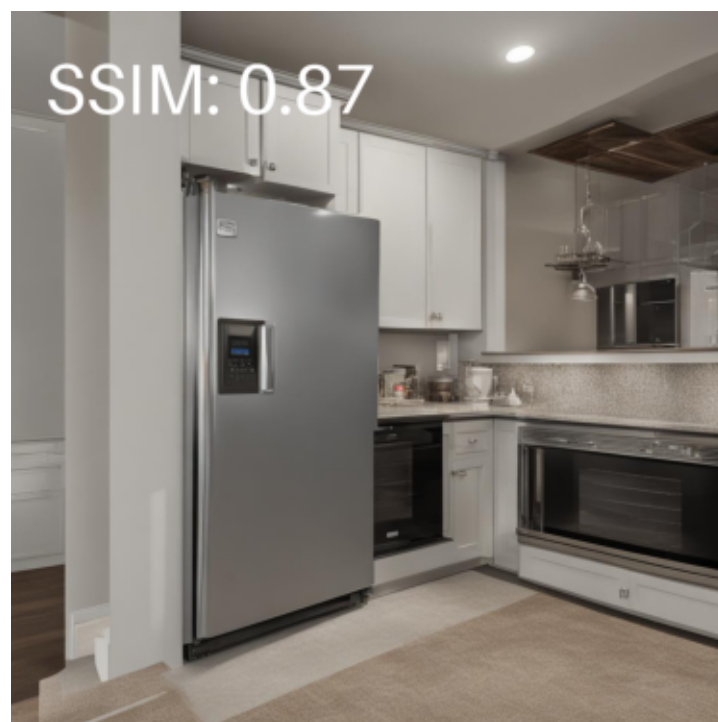

+SR

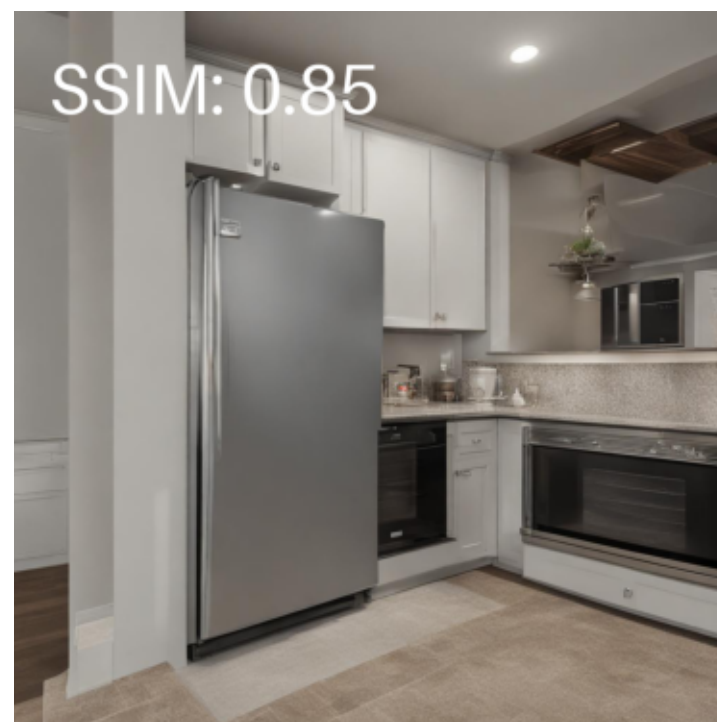

+WSR(p=4)

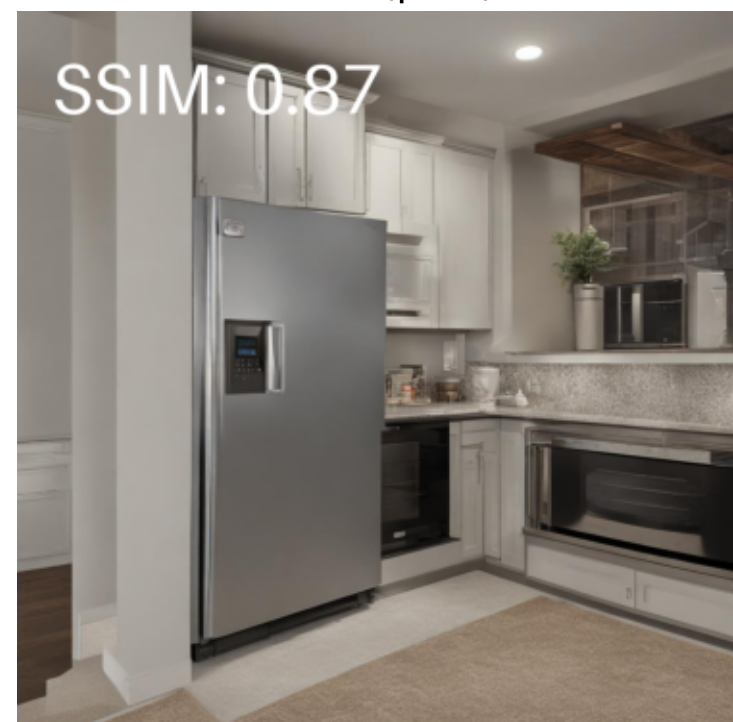

Step 40

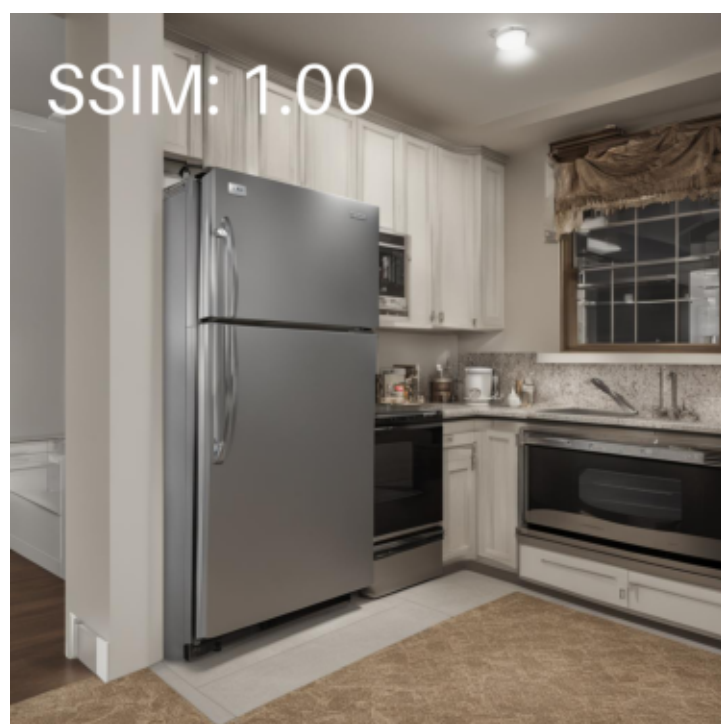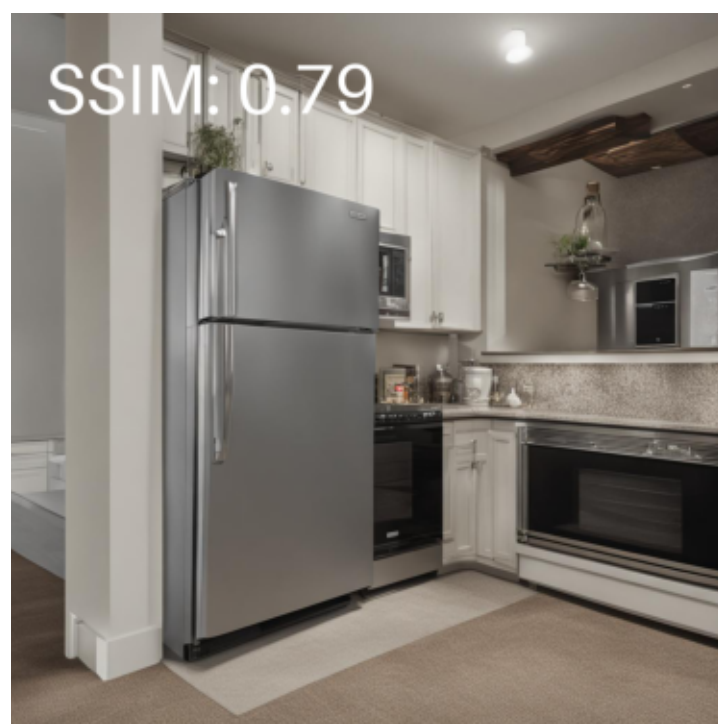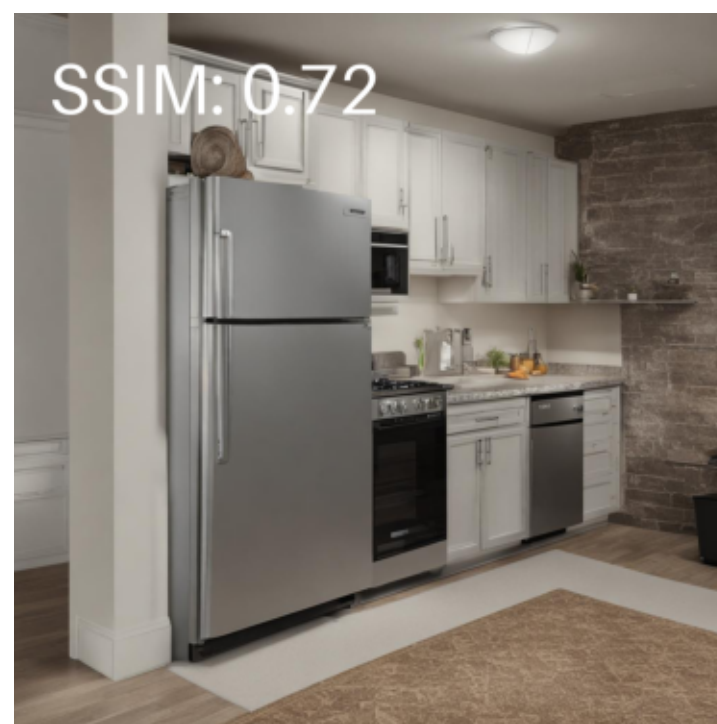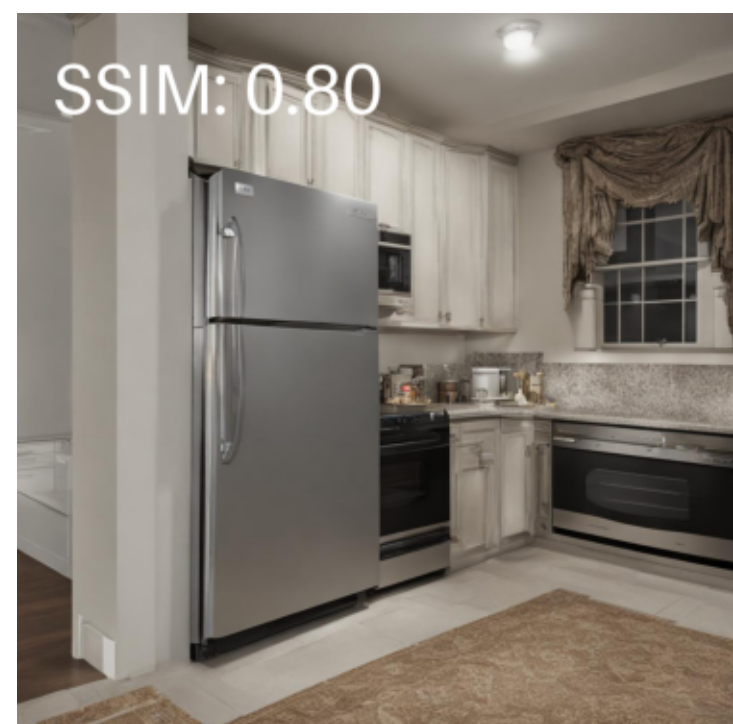

Step 100

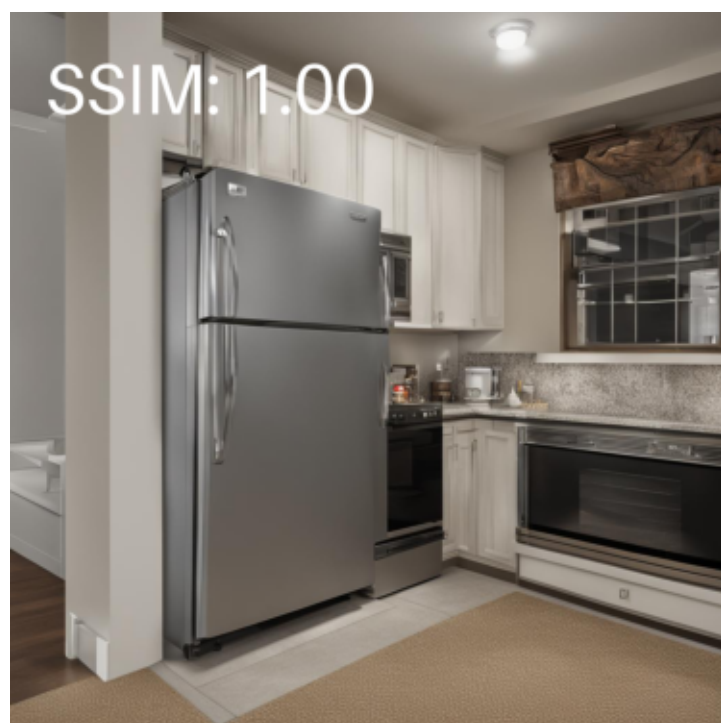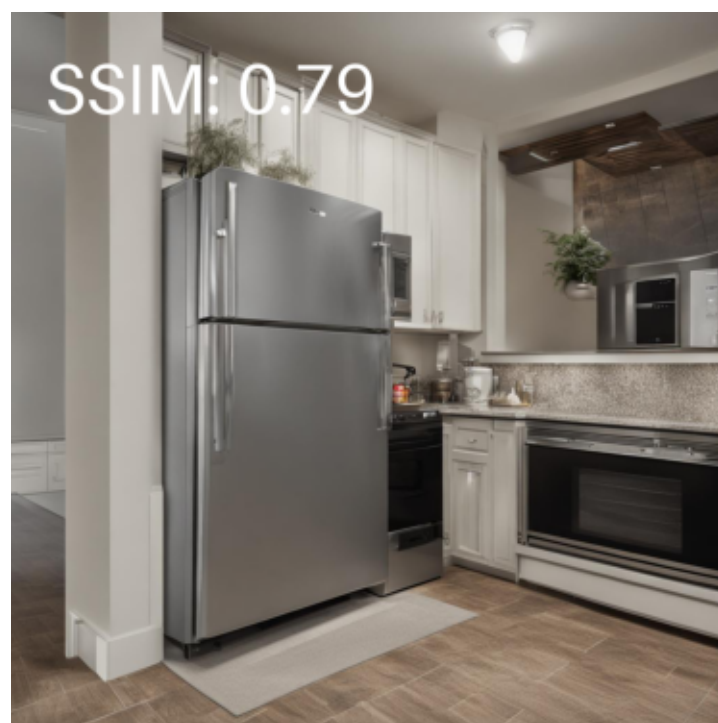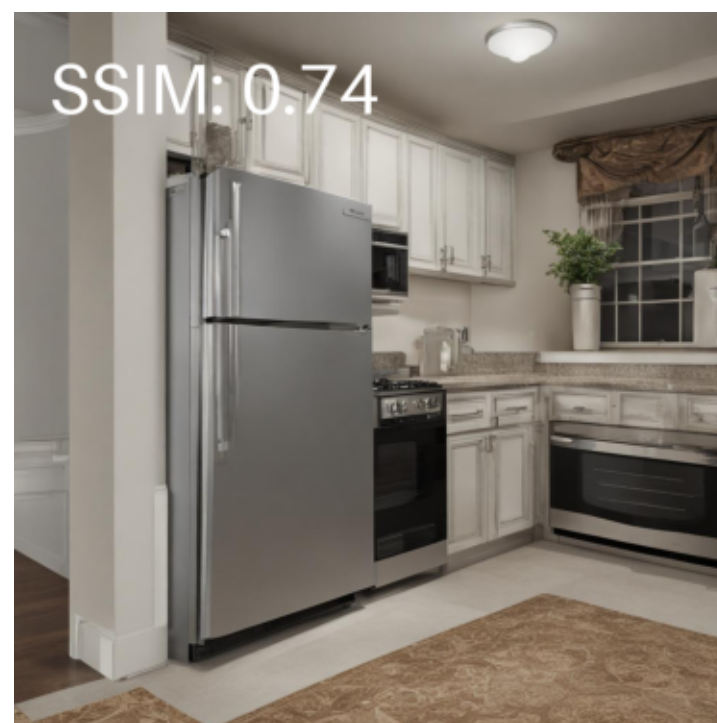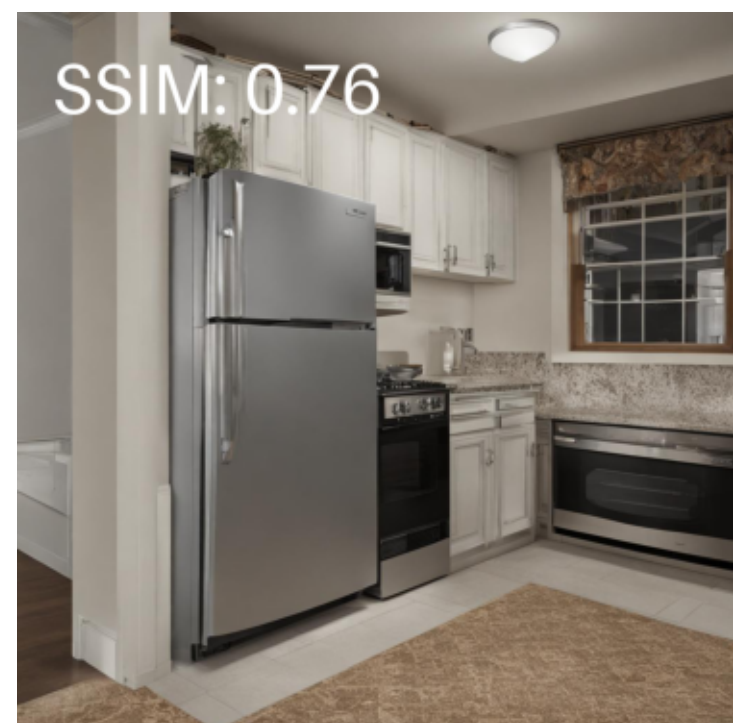

Step 200



tree is a female tennis player that is playing on the court

Step 40

FP32

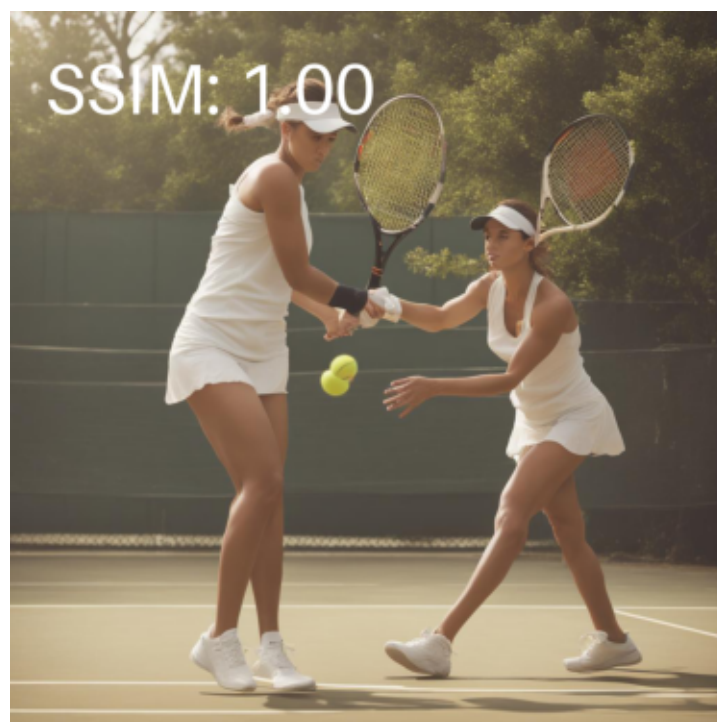

M4E3

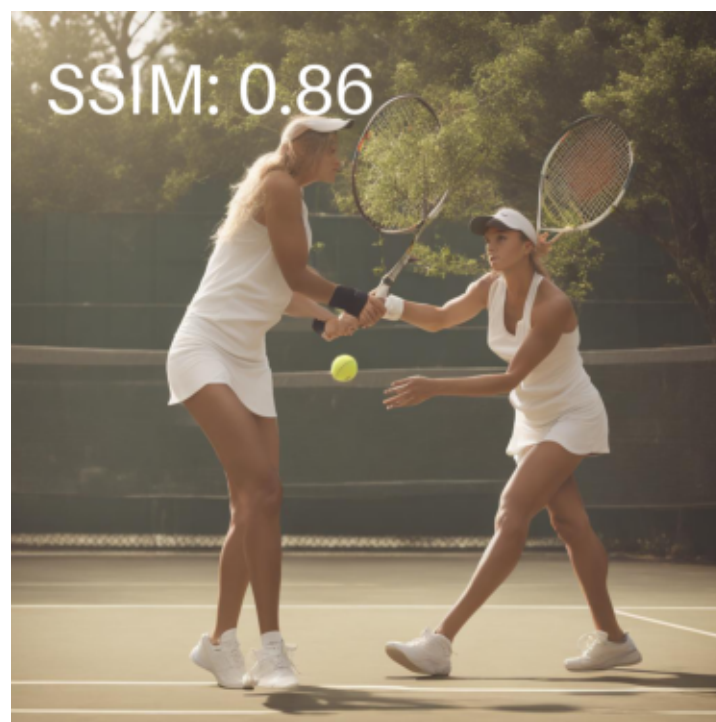

+SR

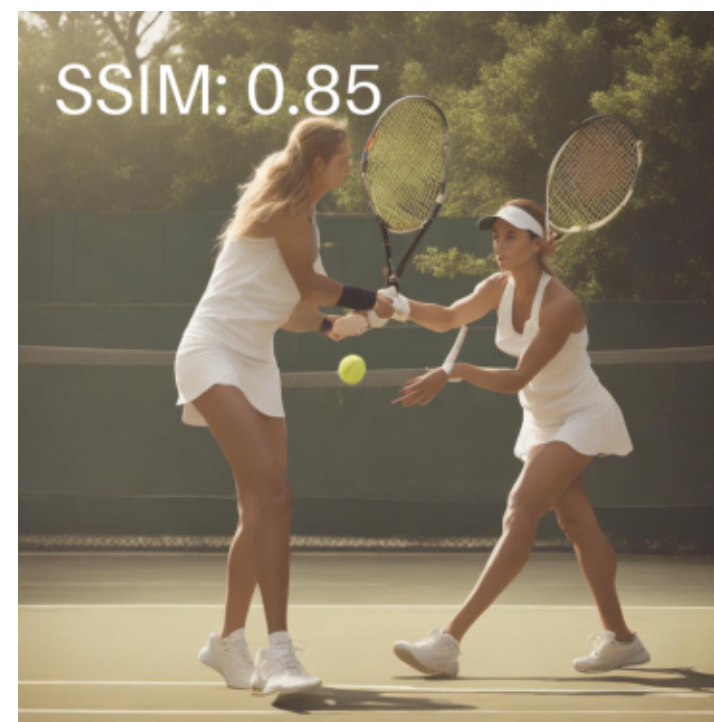

+WSR(p=4)

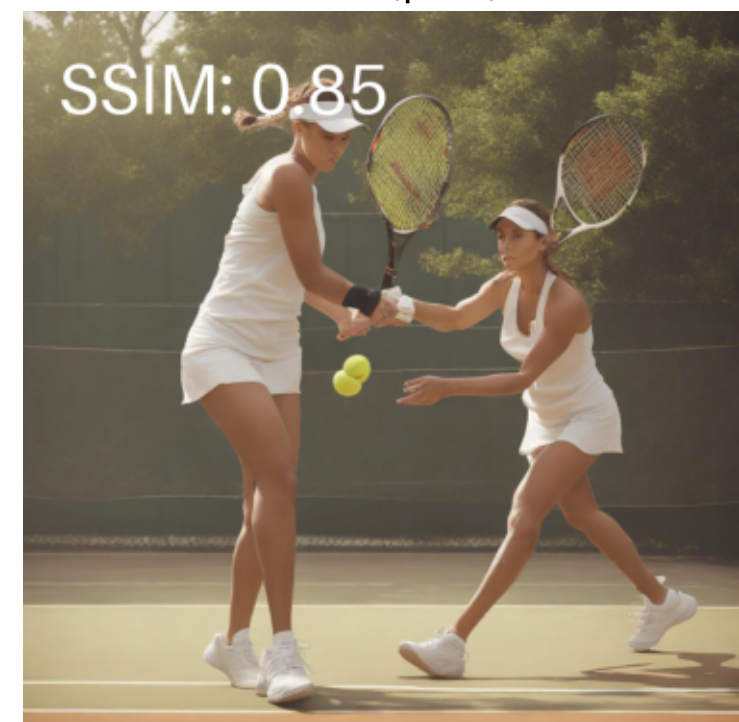

Step 100

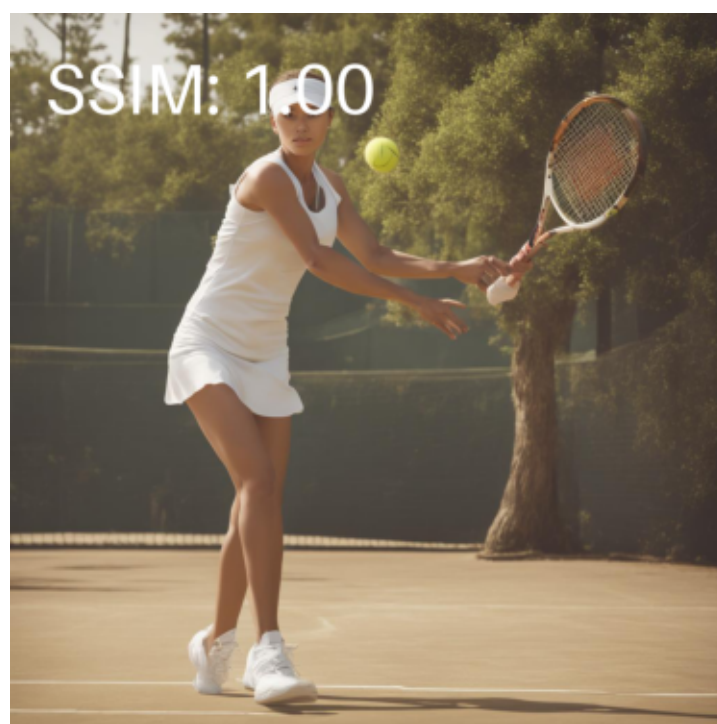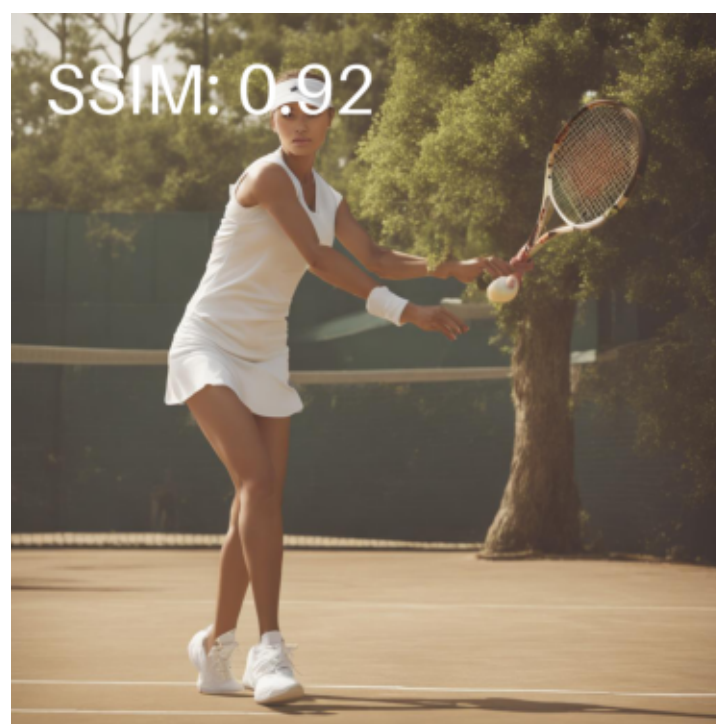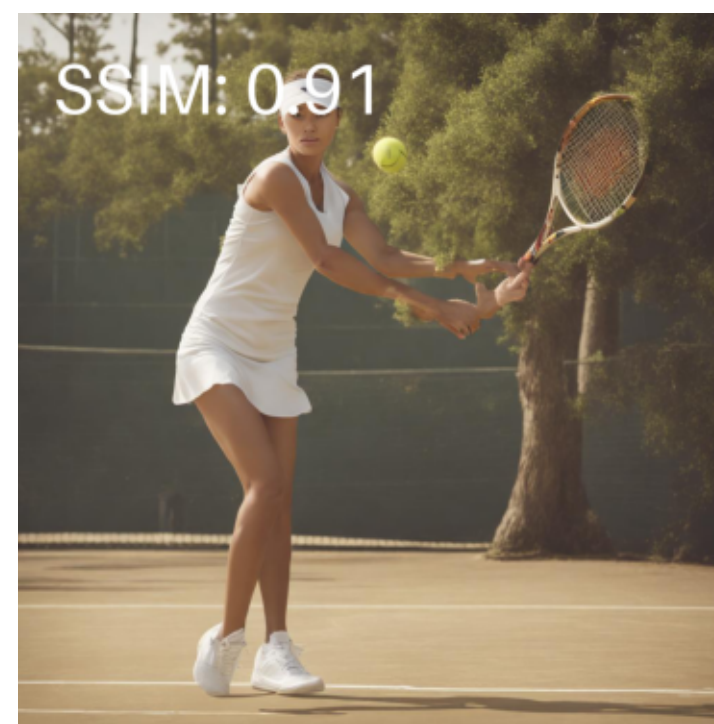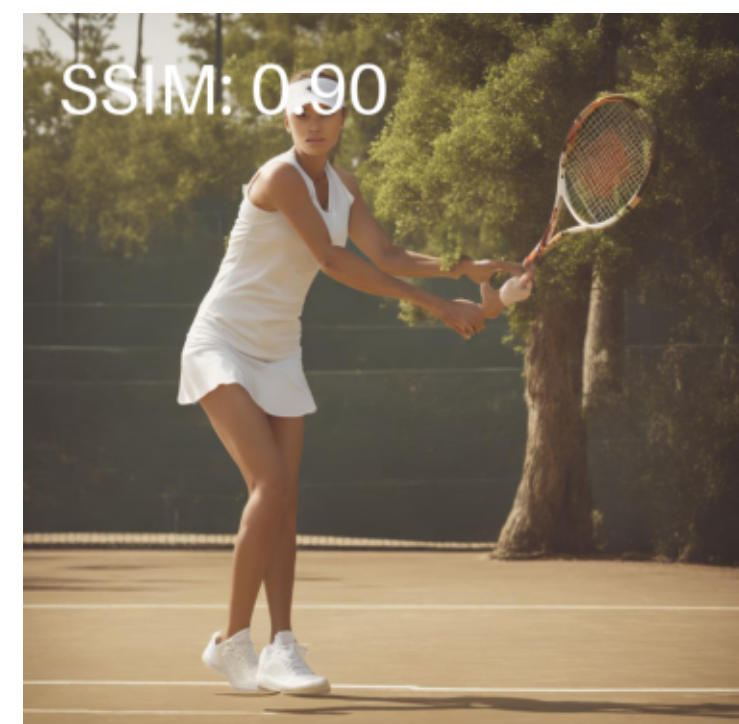

Step 200

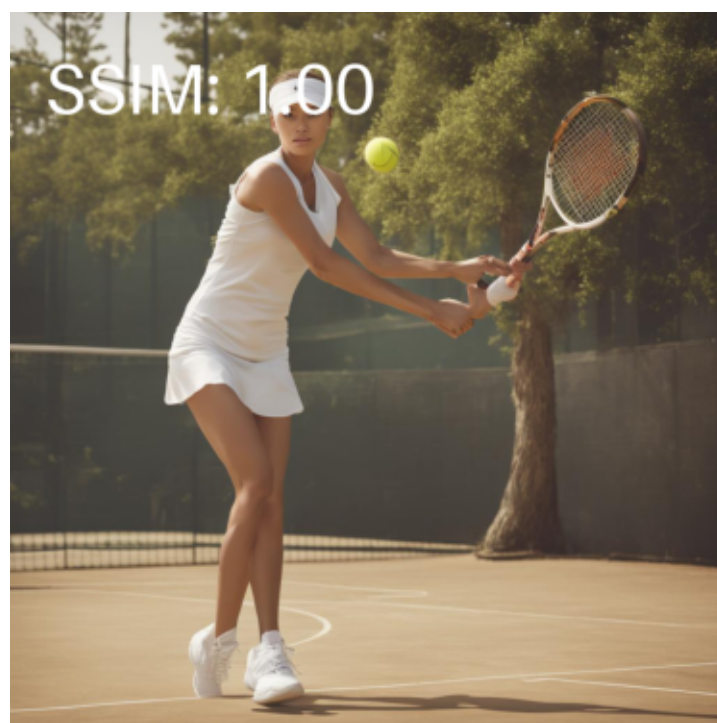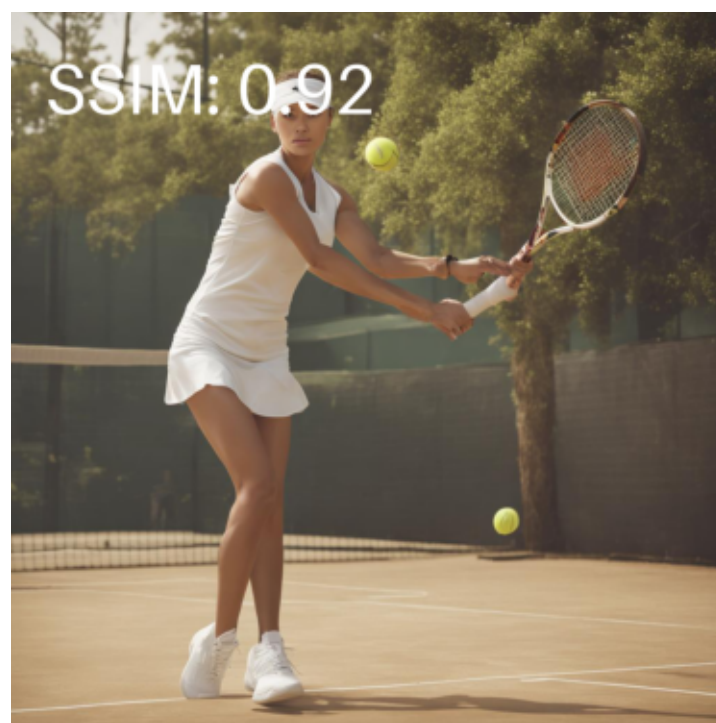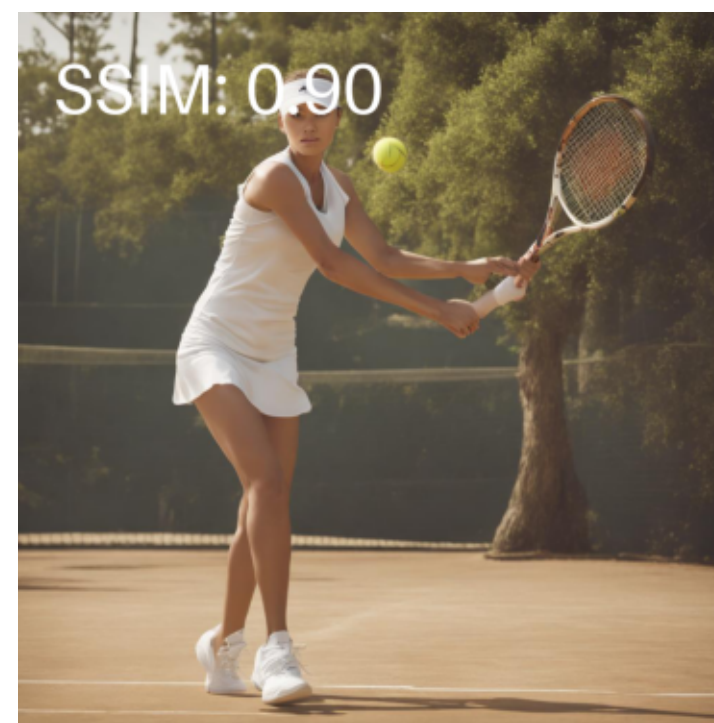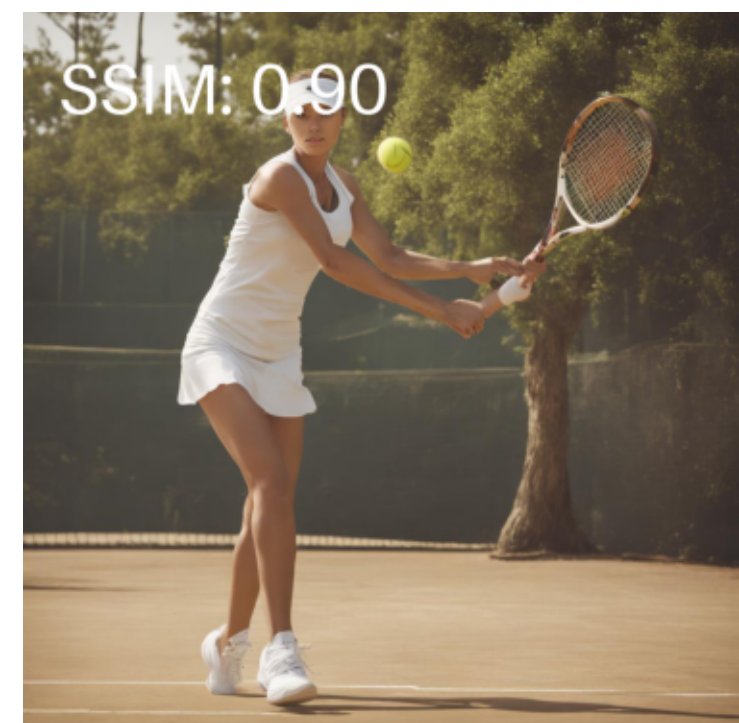



A baby next to a stuffed bear of some sort.

Step 40

FP32

SSIM: 1.00

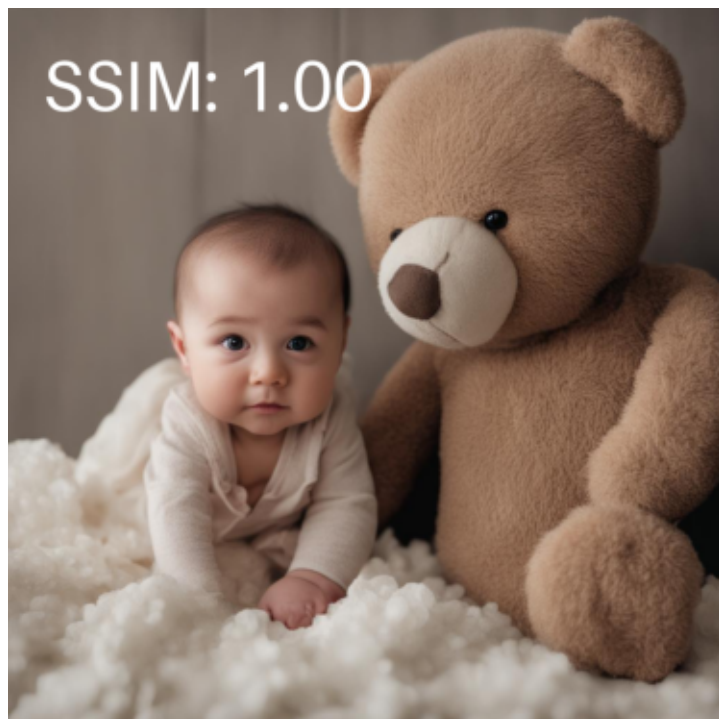

M4E3

SSIM: 0.81

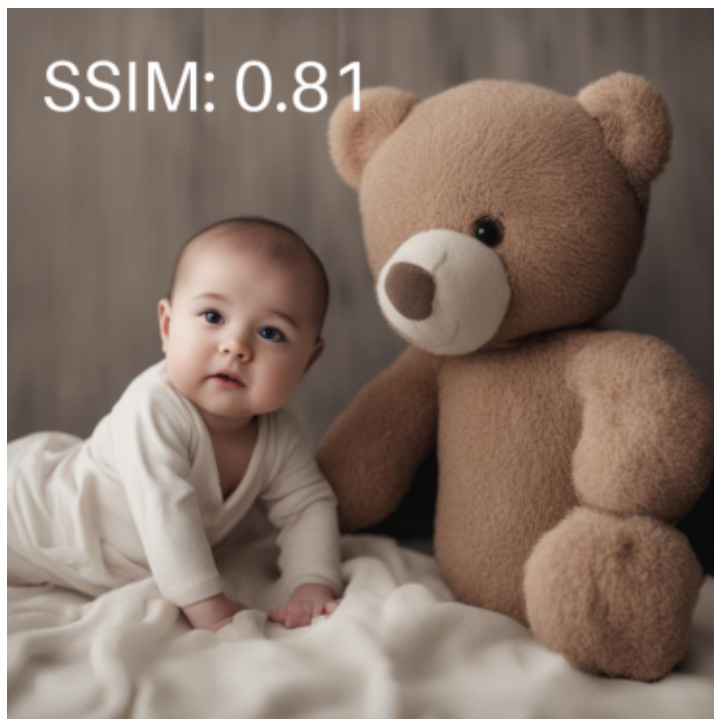

+SR

SSIM: 0.89

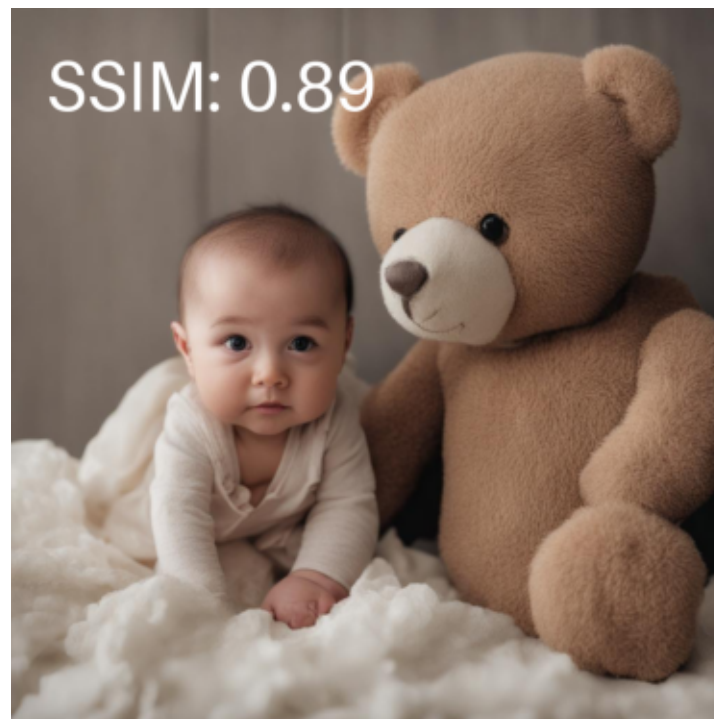

+WSR(p=4)

SSIM: 0.88

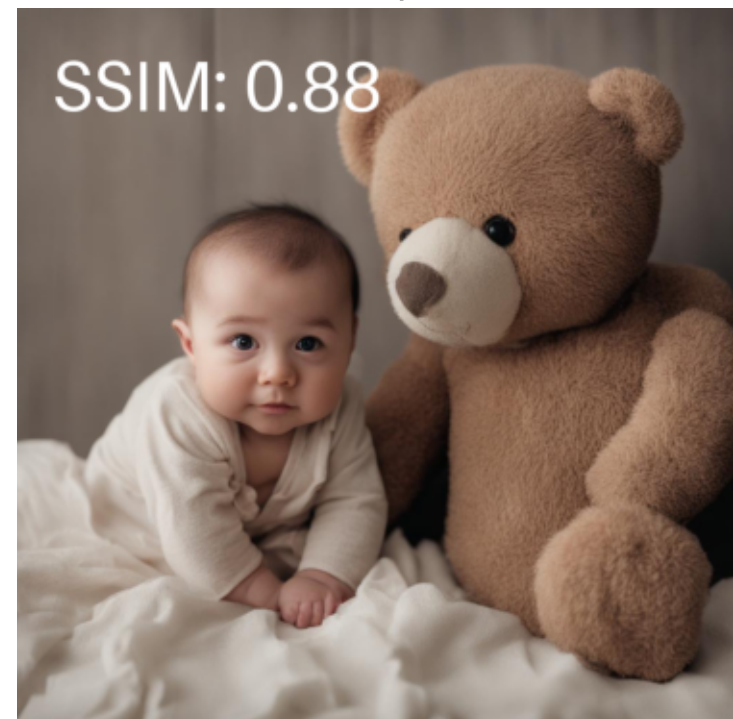

Step 100

SSIM: 1.00

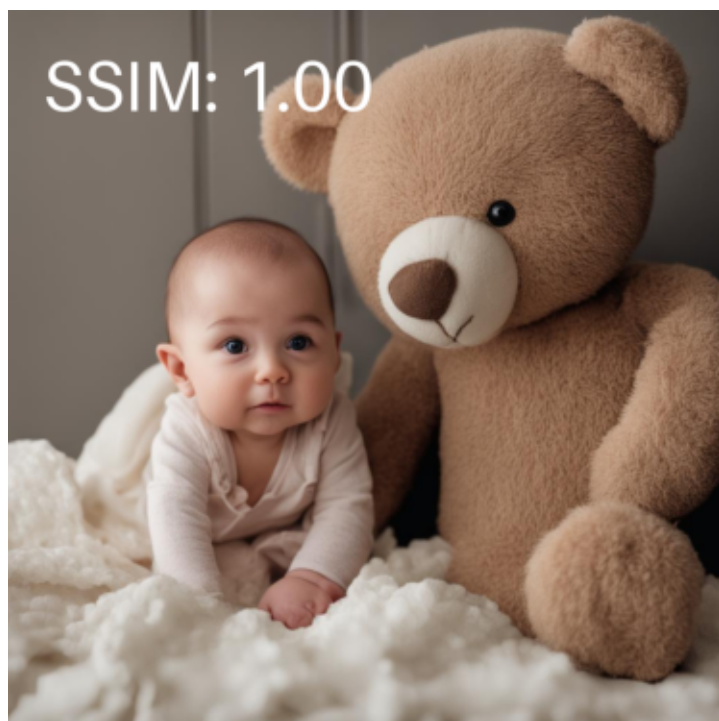

SSIM: 0.82

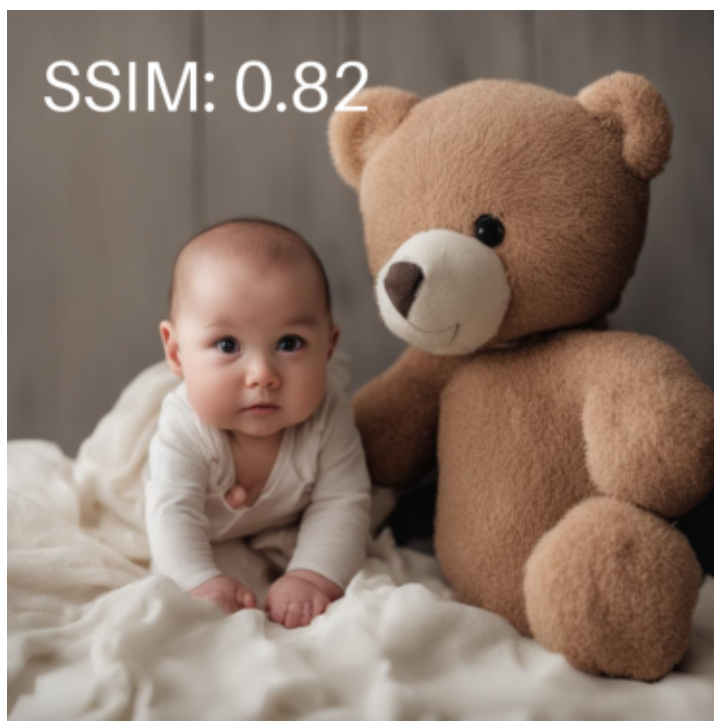

SSIM: 0.93

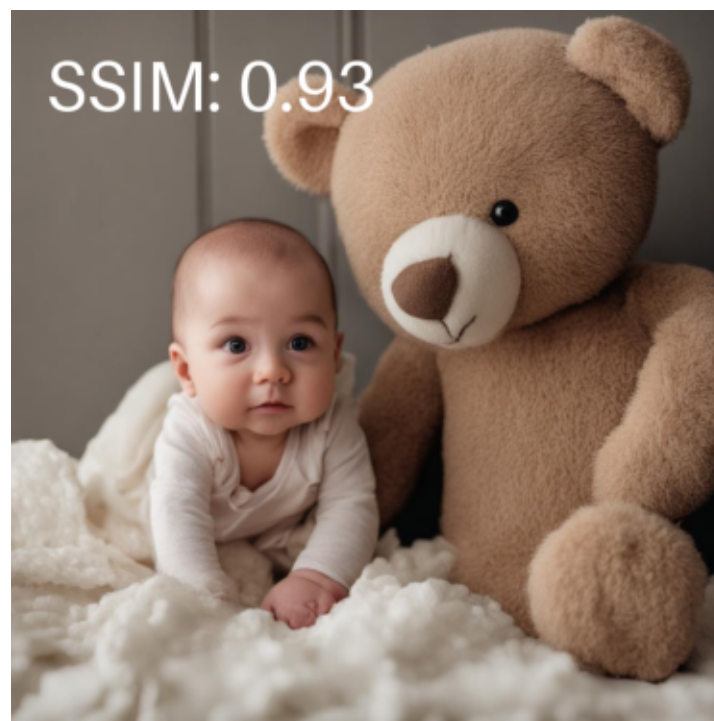

SSIM: 0.93

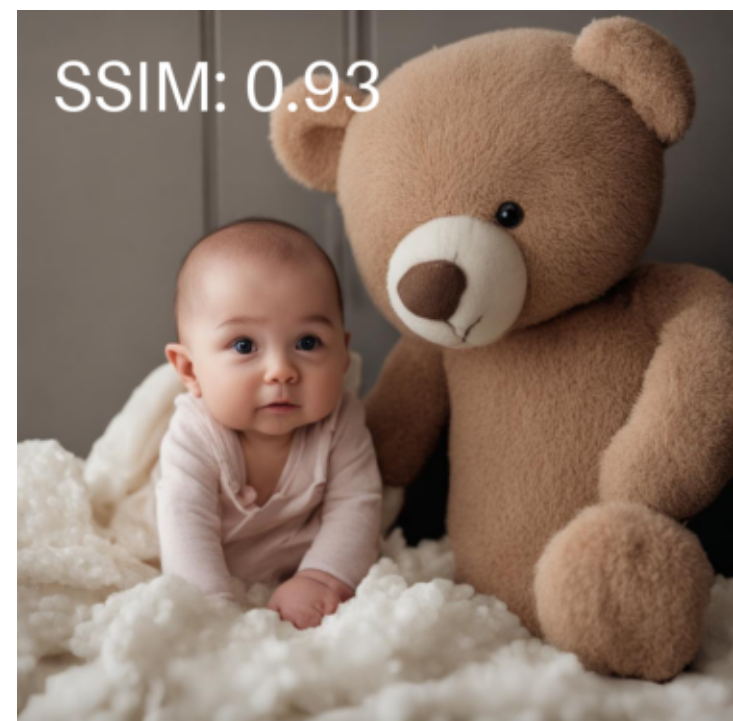

Step 200

SSIM: 1.00

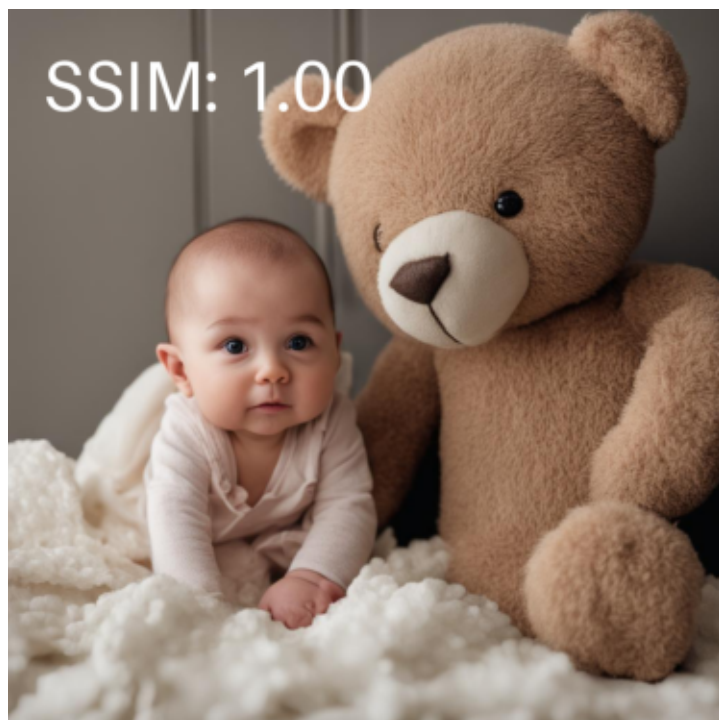

SSIM: 0.81

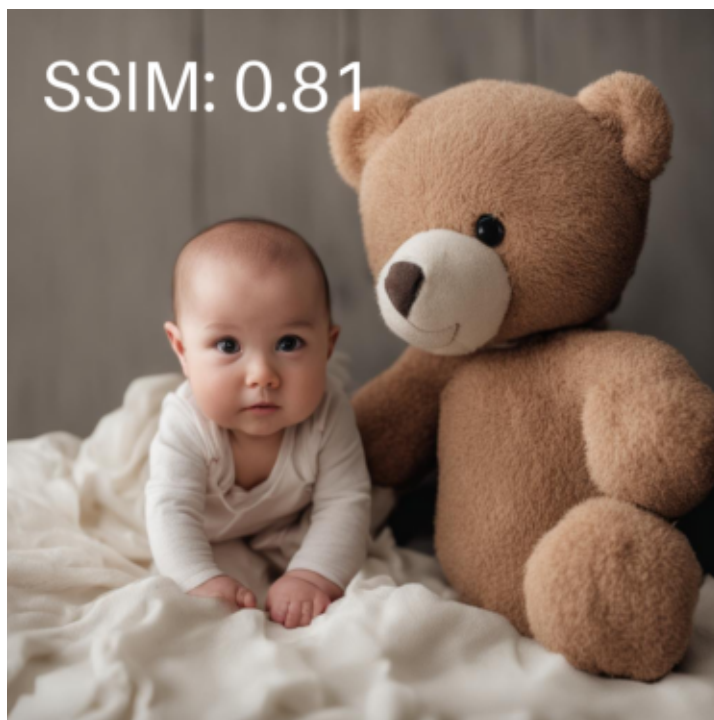

SSIM: 0.83

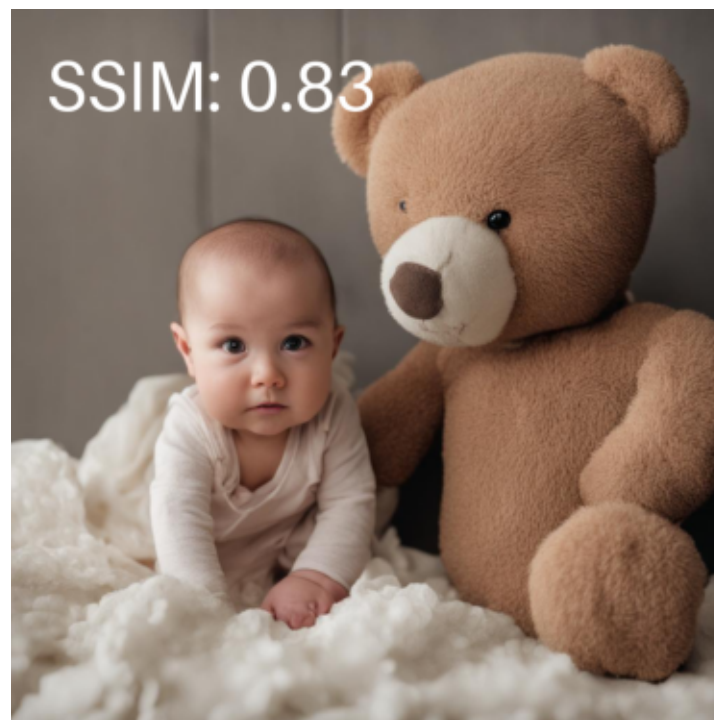

SSIM: 0.83

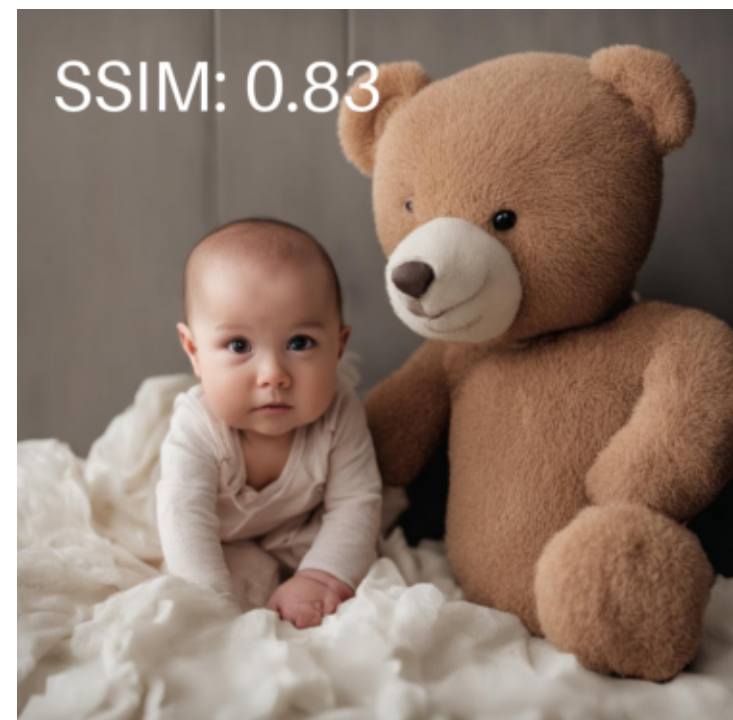



A young boy riding a skateboard across a parking lot.

Step 40

FP32

SSIM: 1.00

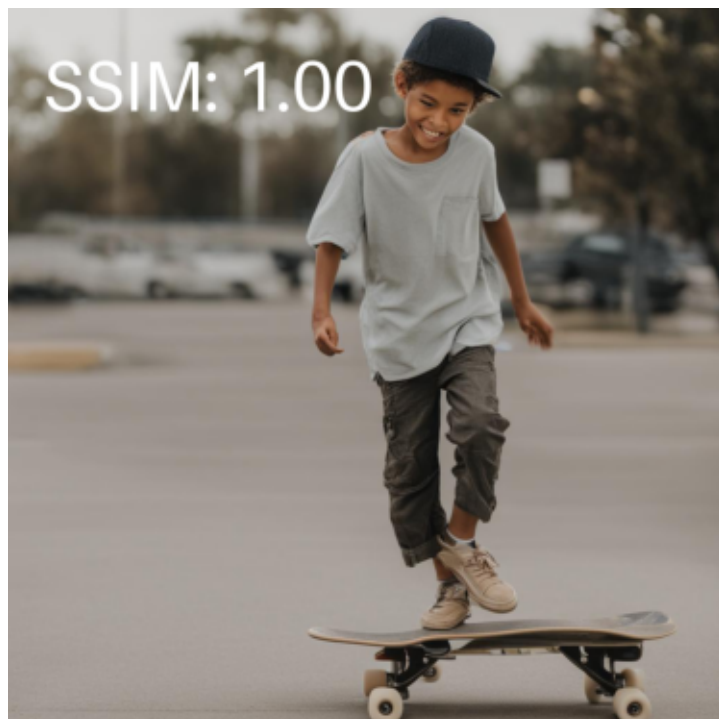

M4E3

SSIM: 0.93

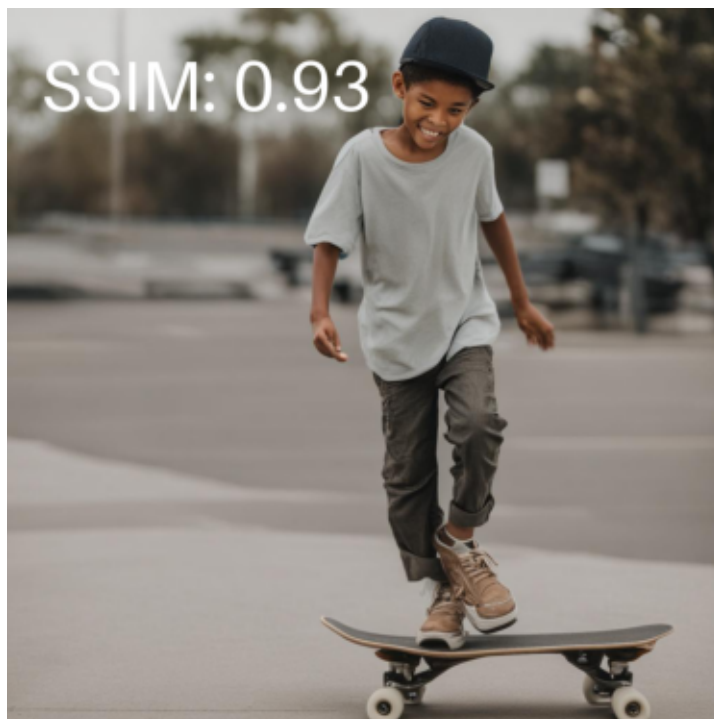

+SR

SSIM: 0.92

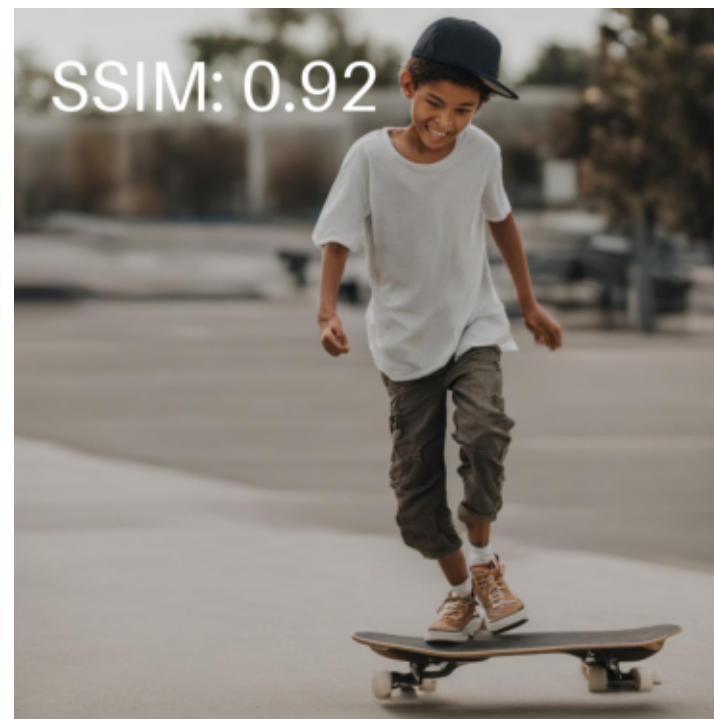

+WSR(p=4)

SSIM: 0.93

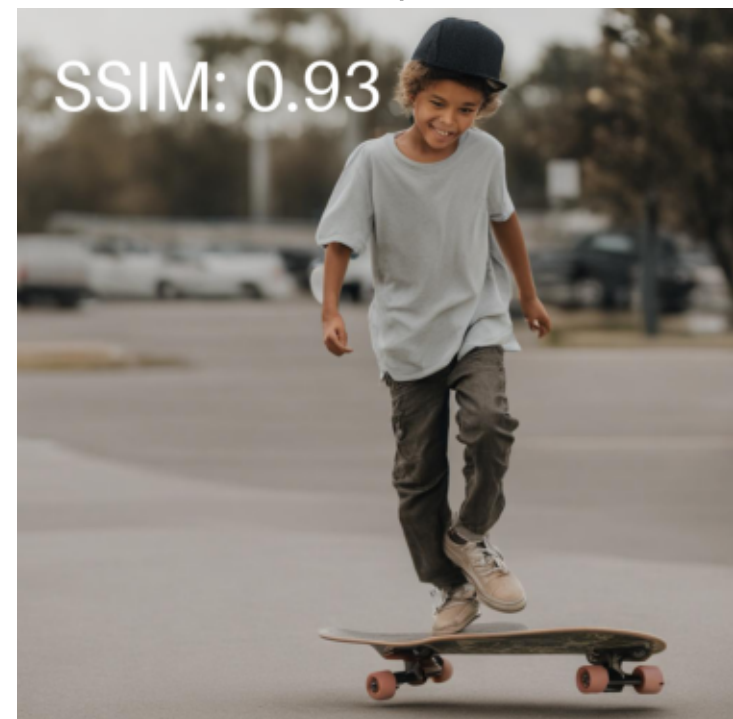

Step 100

SSIM: 1.00

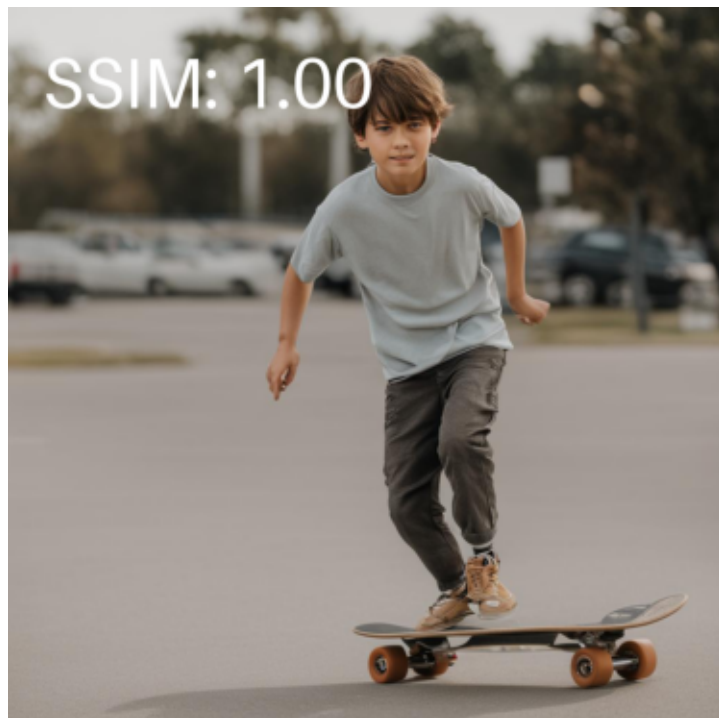

SSIM: 0.90

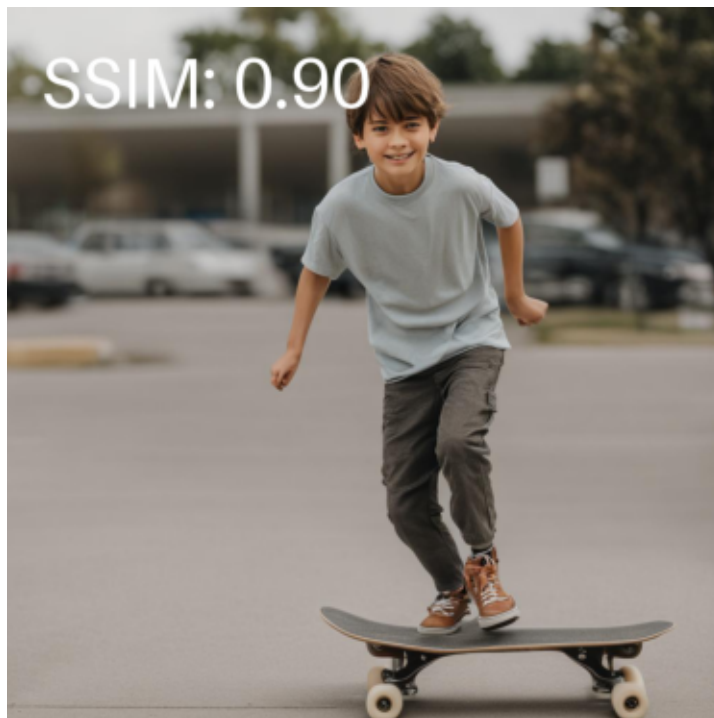

SSIM: 0.94

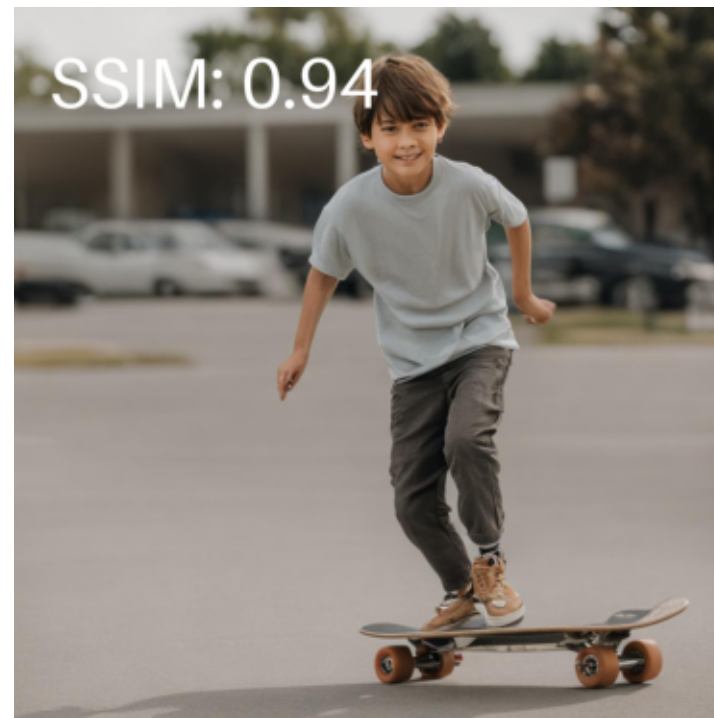

SSIM: 0.96

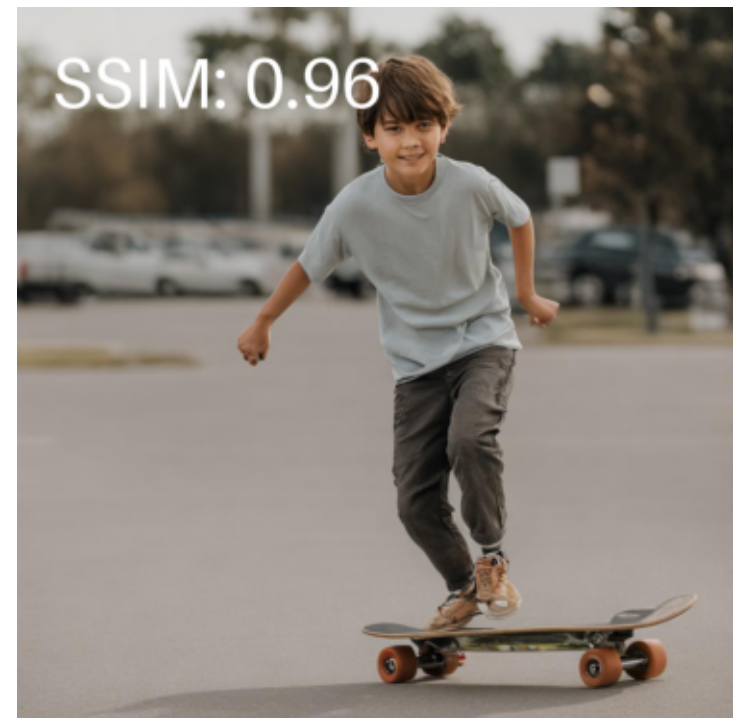

Step 200

SSIM: 1.00

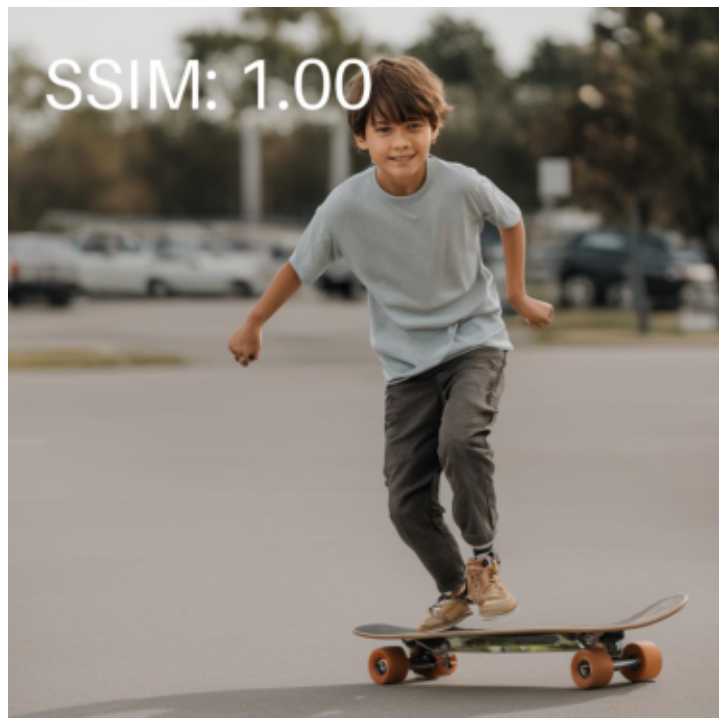

SSIM: 0.90

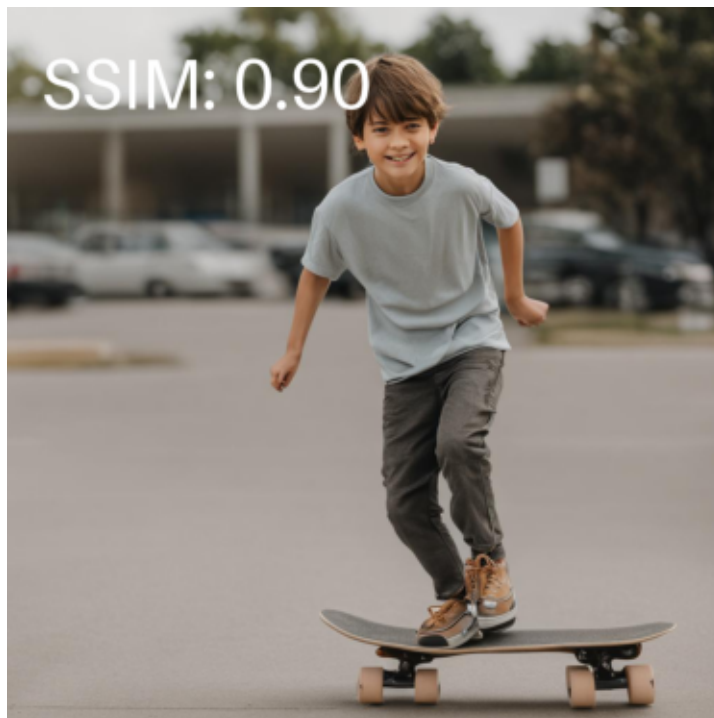

SSIM: 0.94

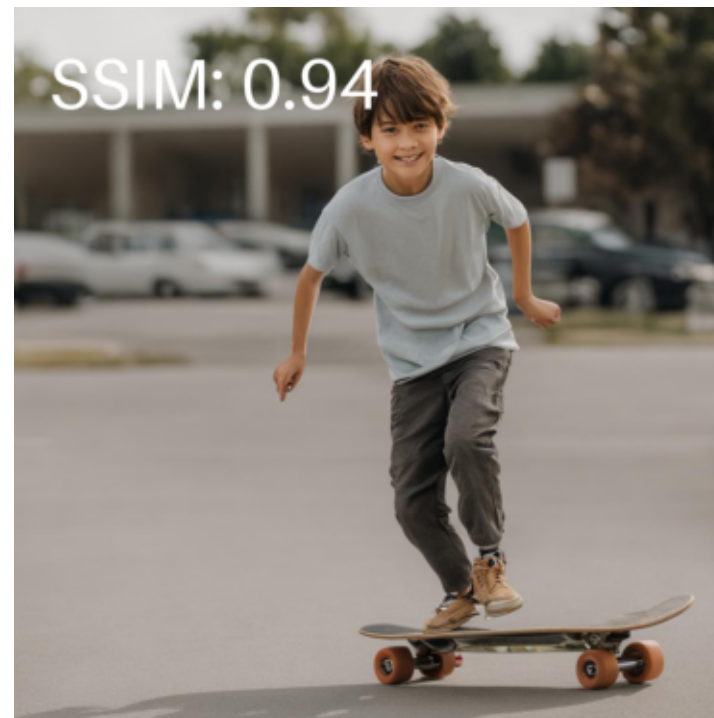

SSIM: 0.96

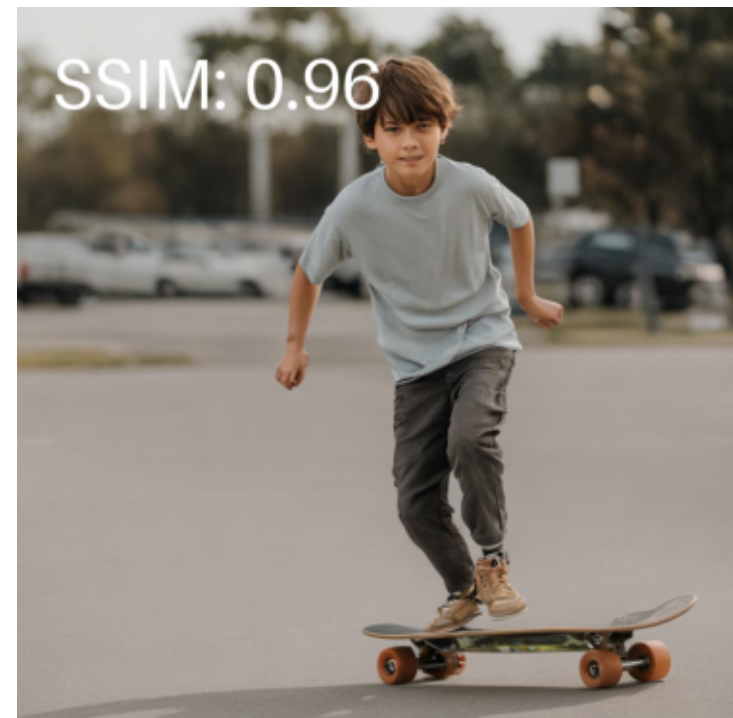



A desk with computers and monitors and books.

Step 40

FP32

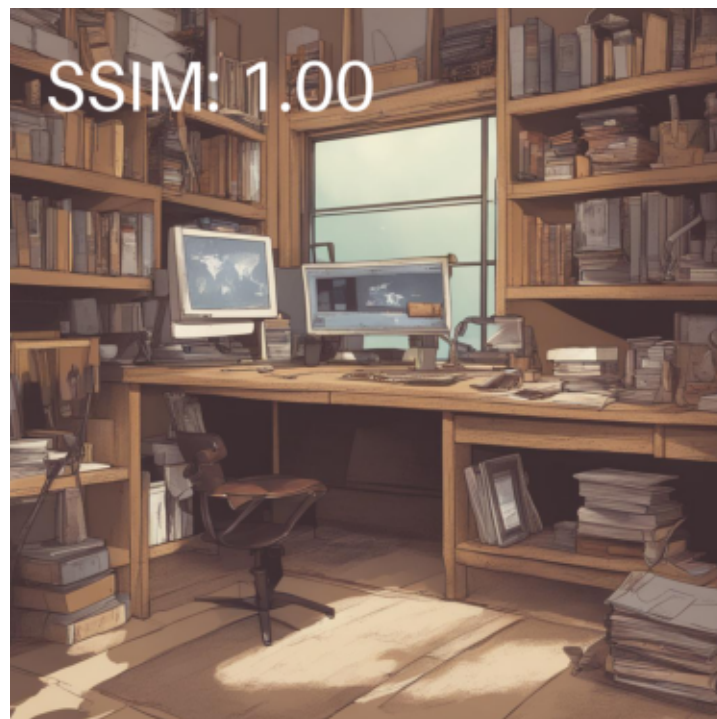

M4E3

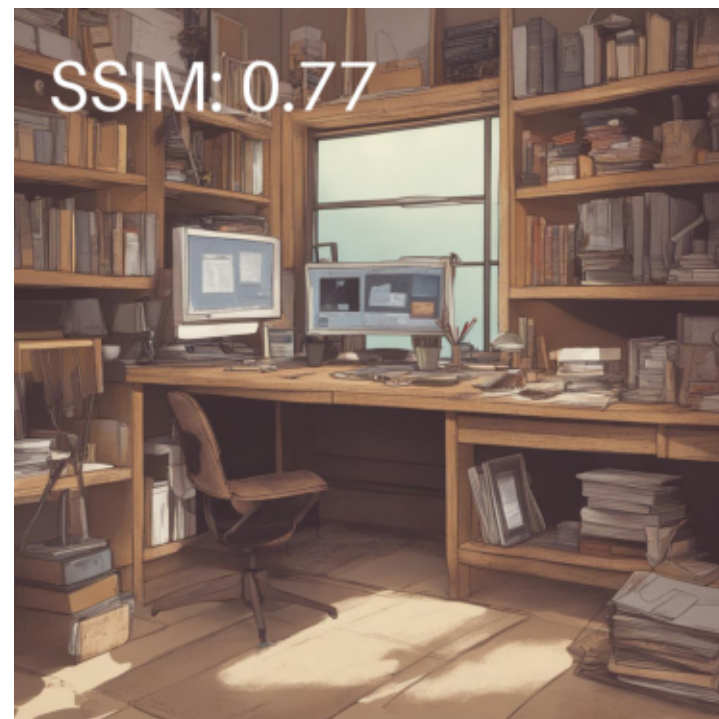

+SR

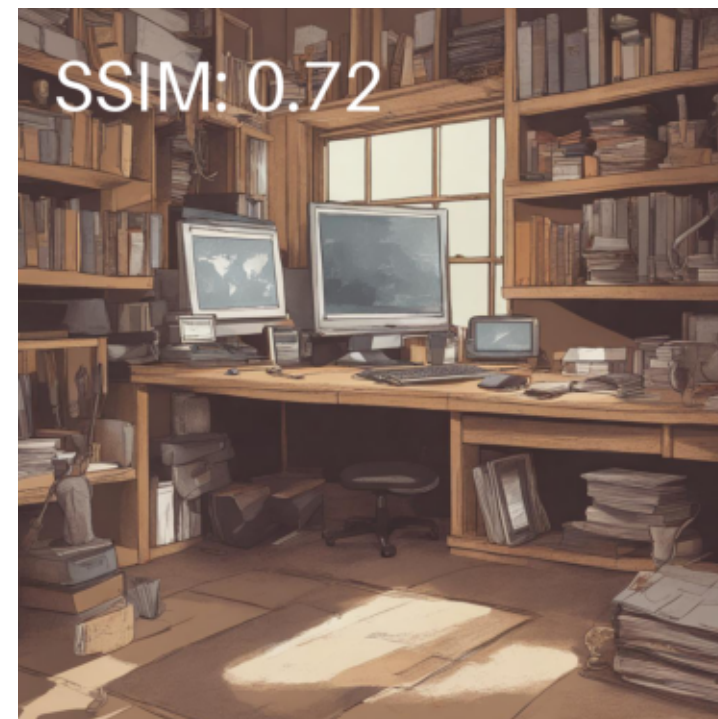

+WSR(p=4)

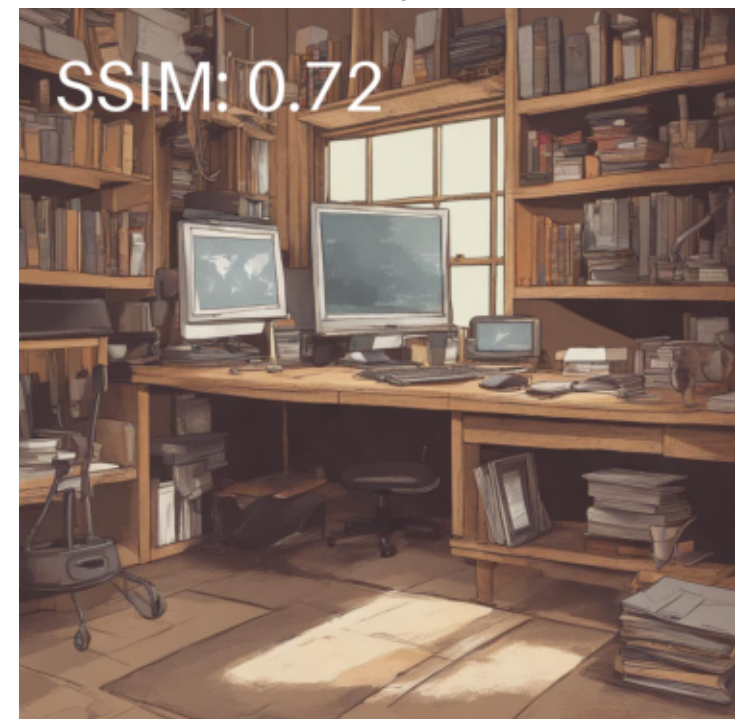

Step 100

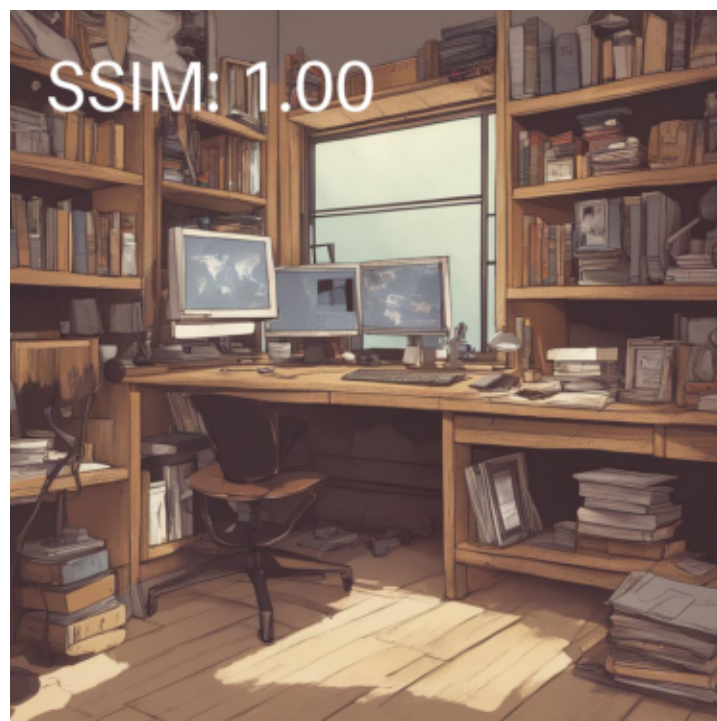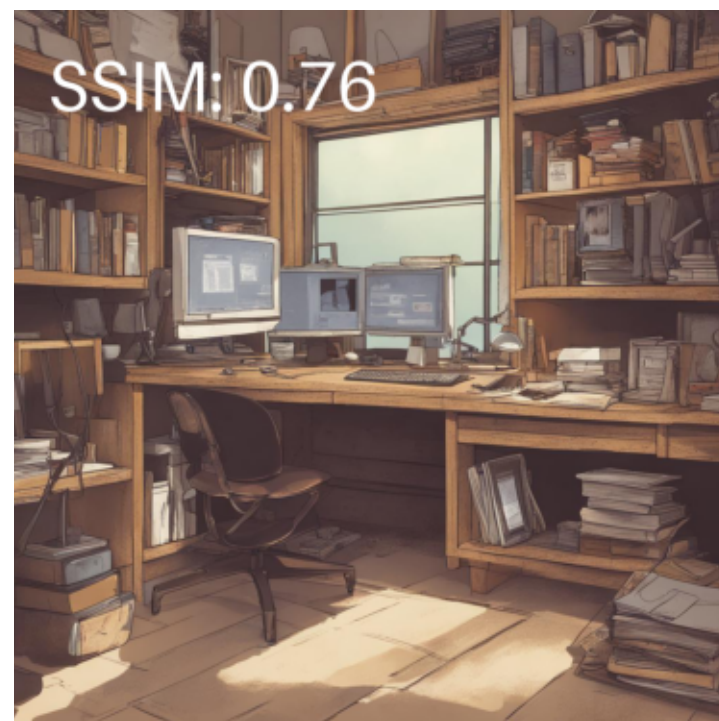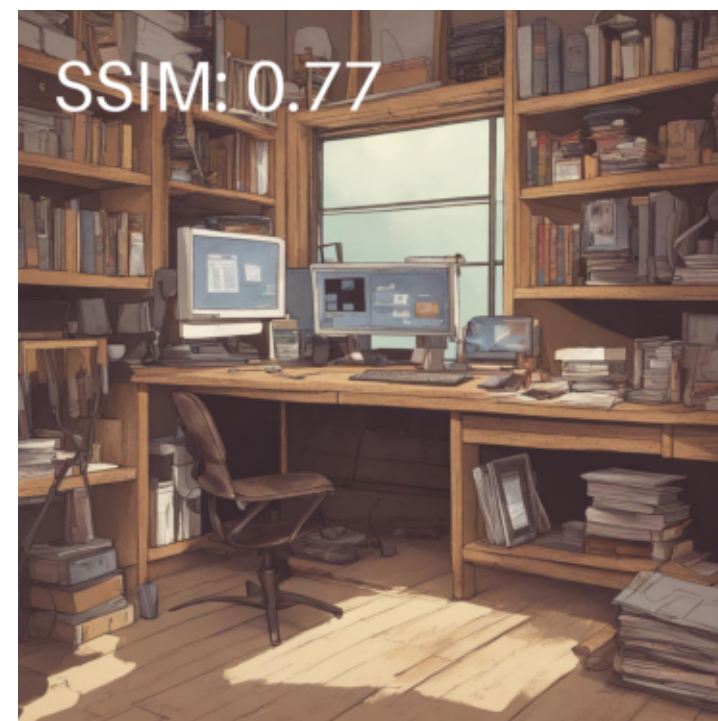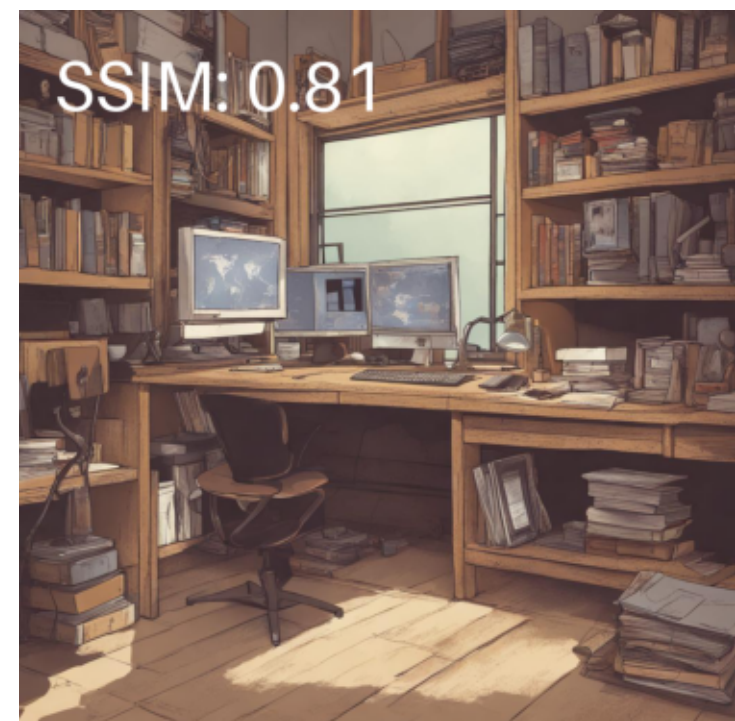

Step 200

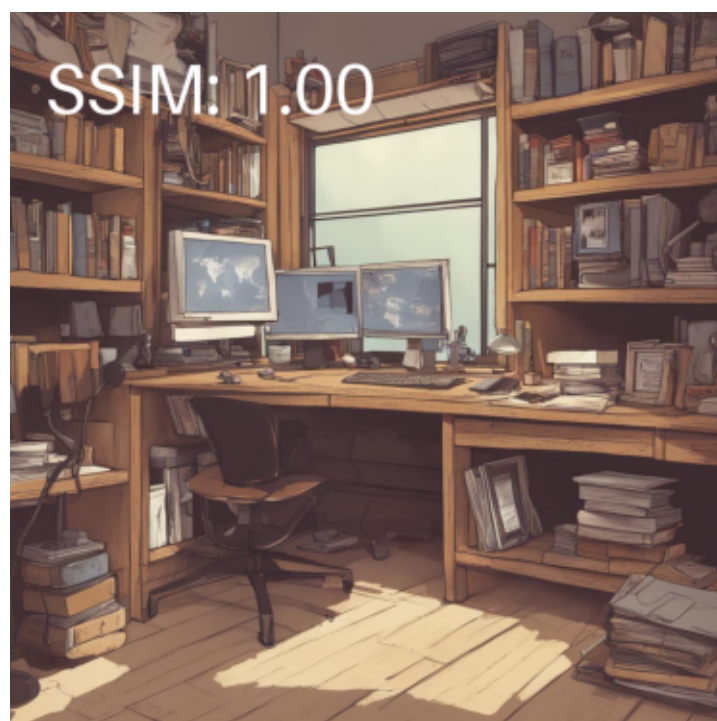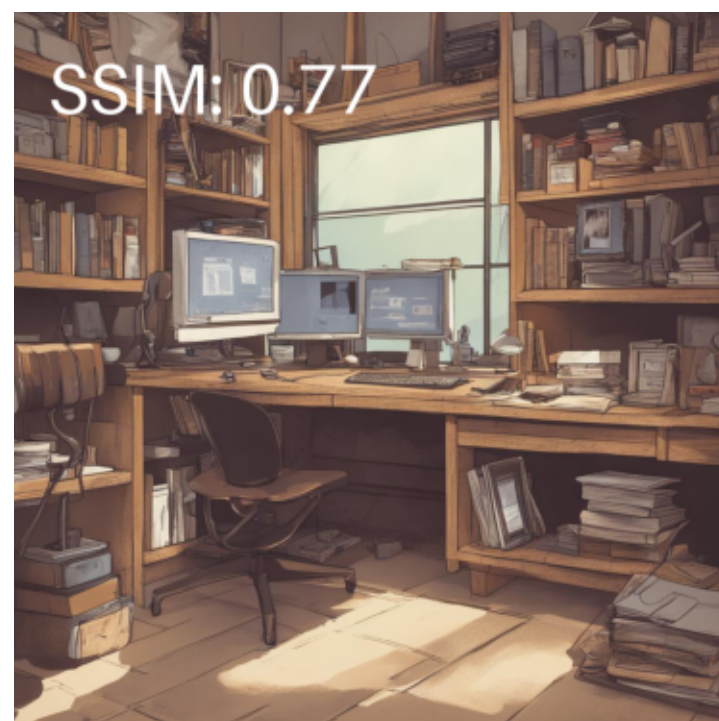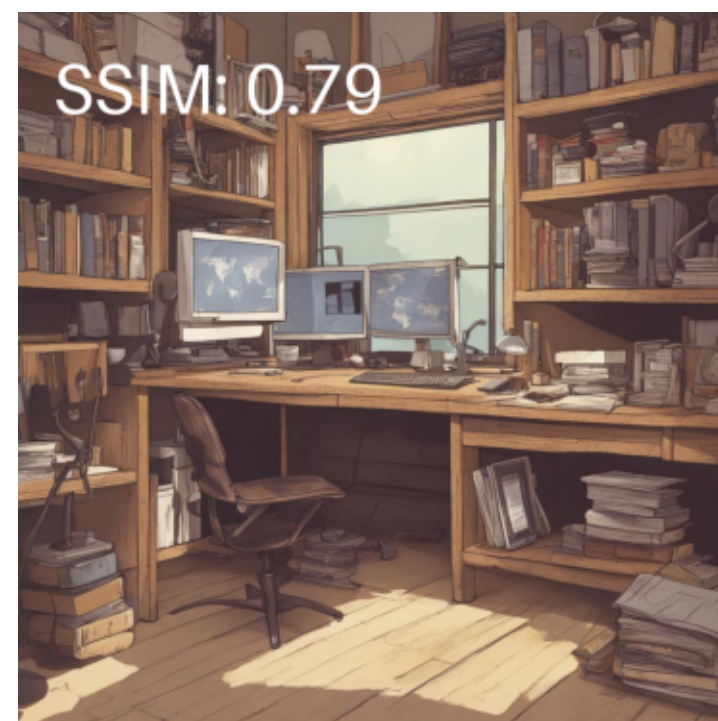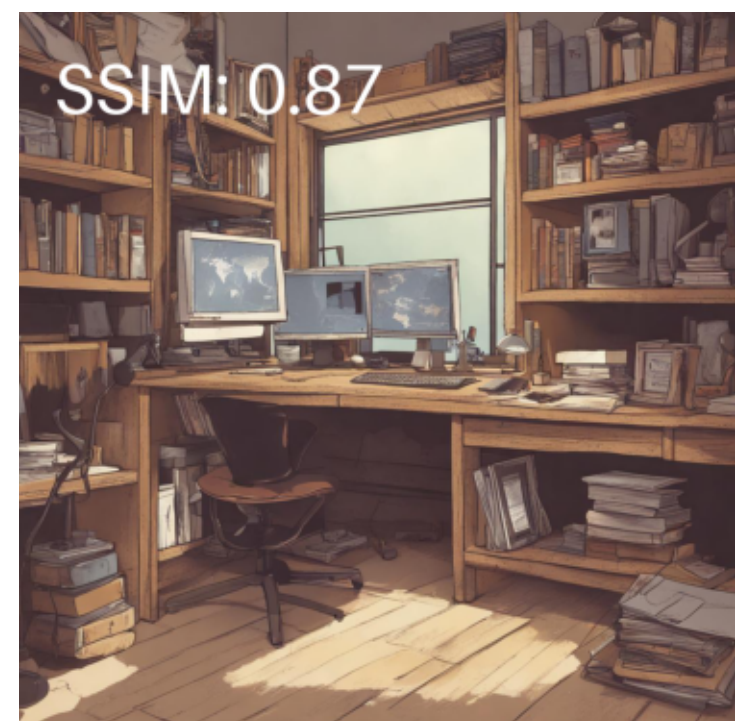



A black and white cat sniffs a laptop computer.

Step 40

FP32

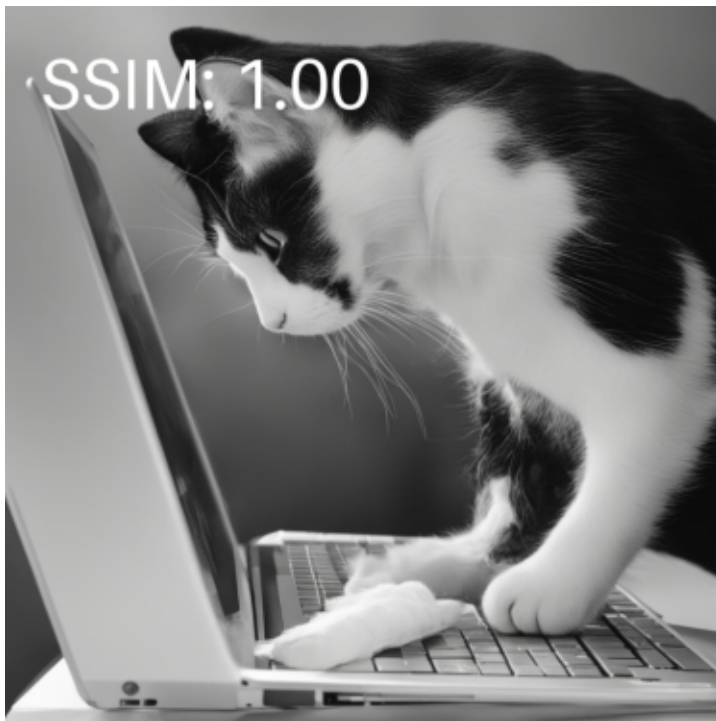

M4E3

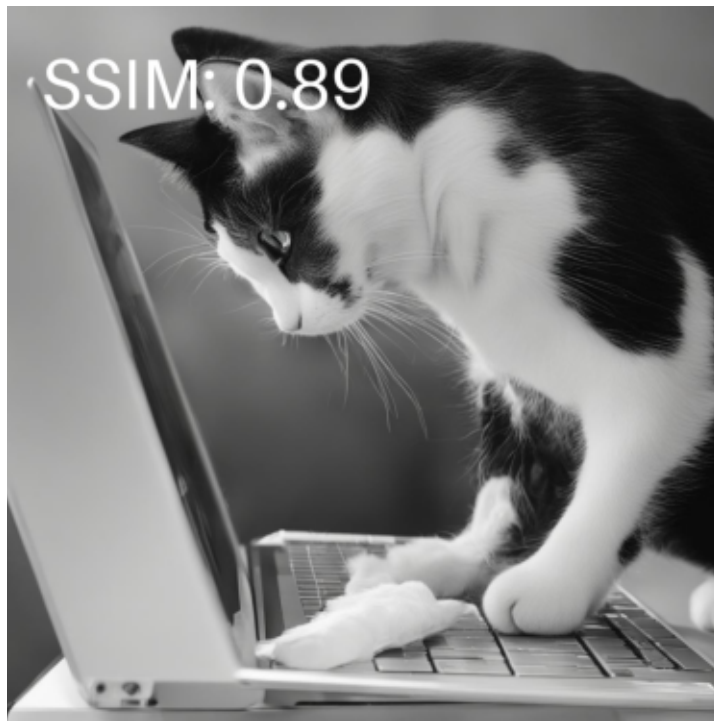

+SR

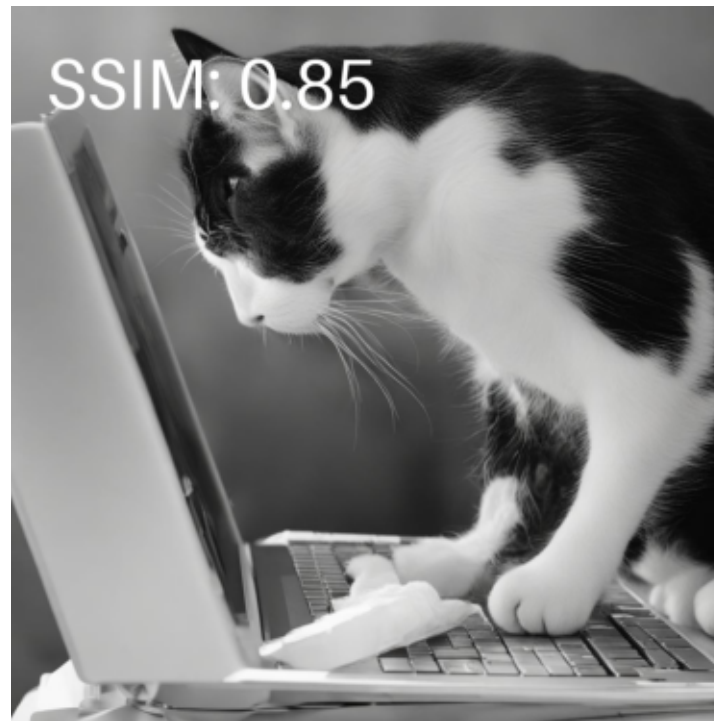

+WSR(p=4)

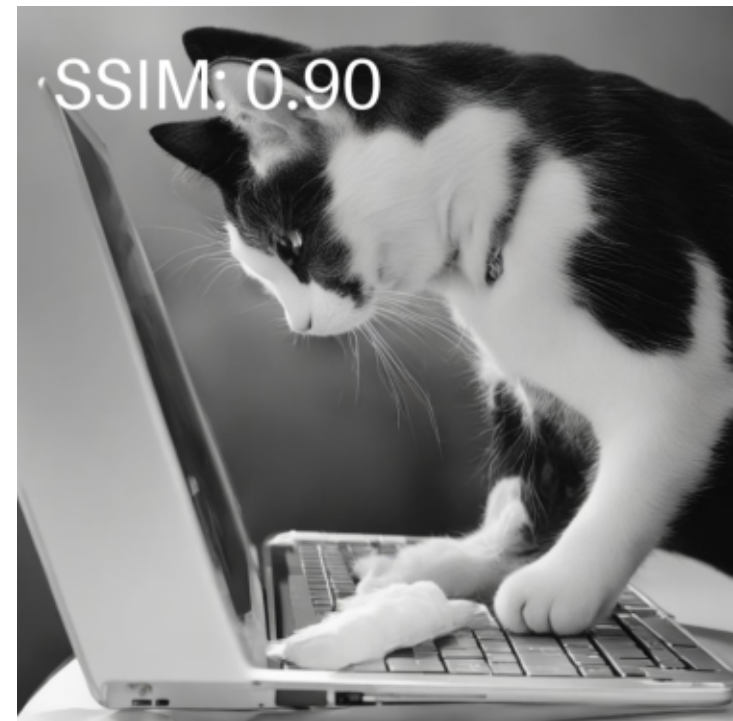

Step 100

SSIM: 1.00

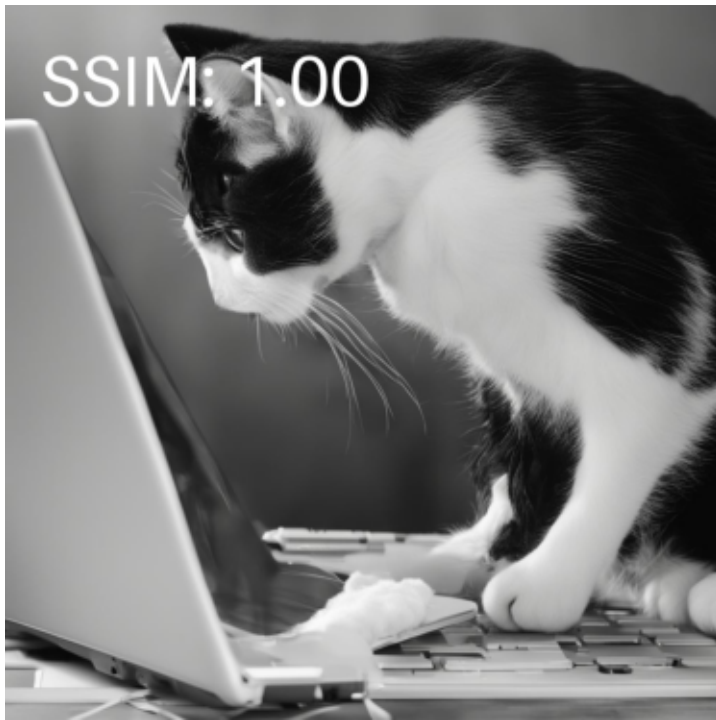

SSIM: 0.88

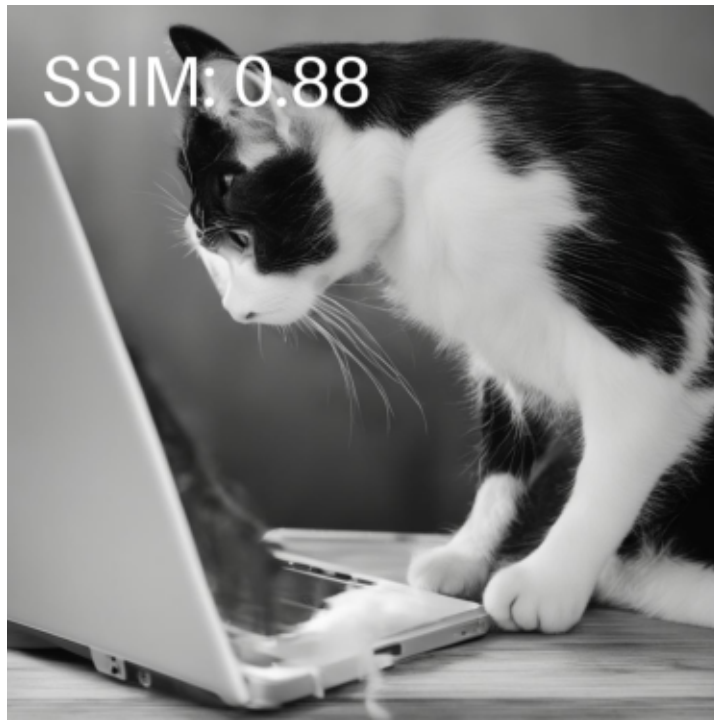

SSIM: 0.85

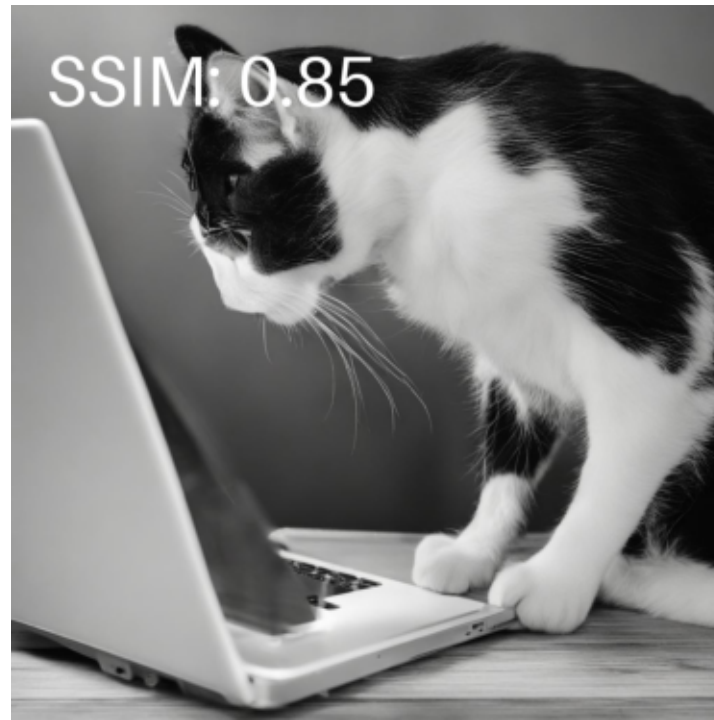

SSIM: 0.84

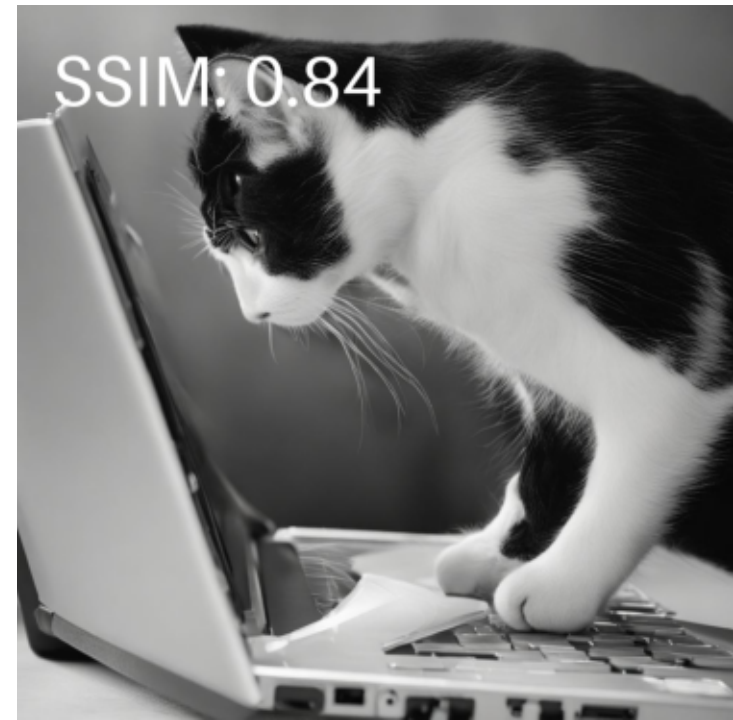

Step 200

SSIM: 1.00

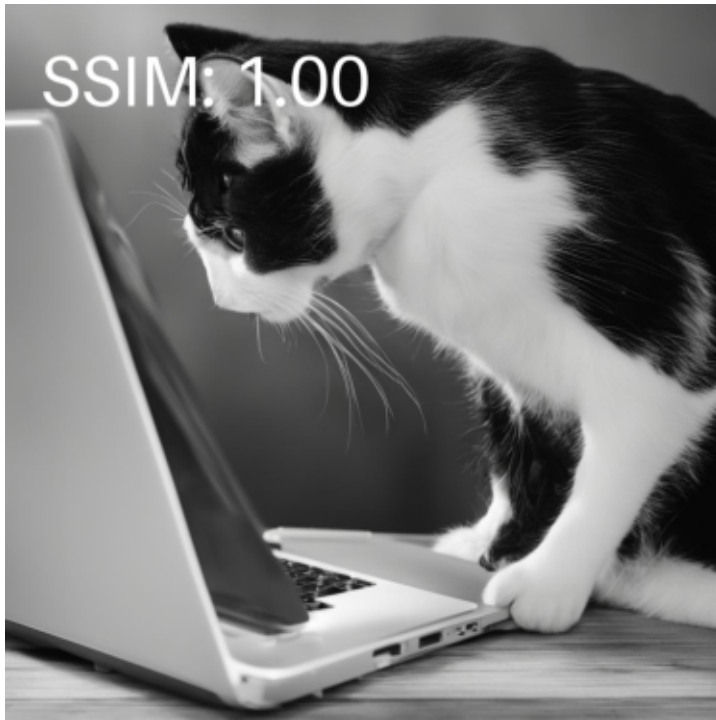

SSIM: 0.88

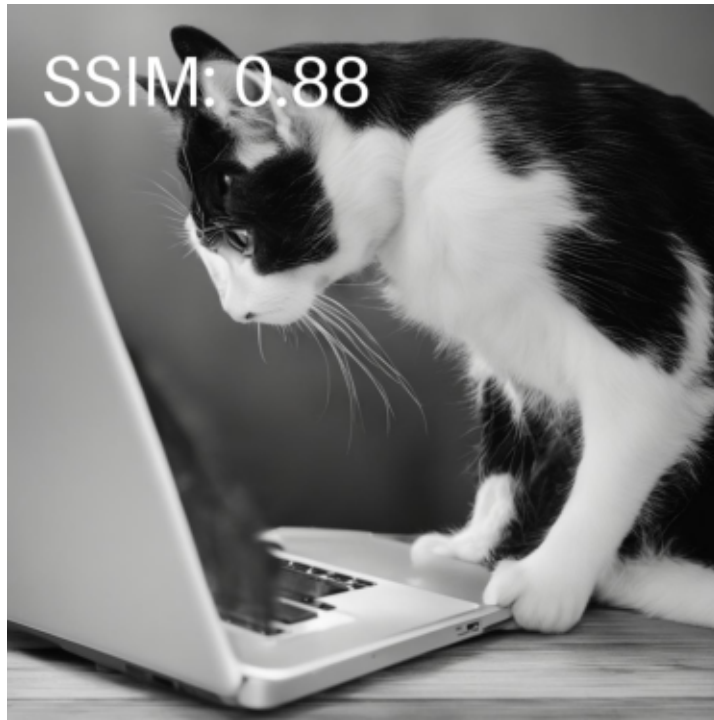

SSIM: 0.85

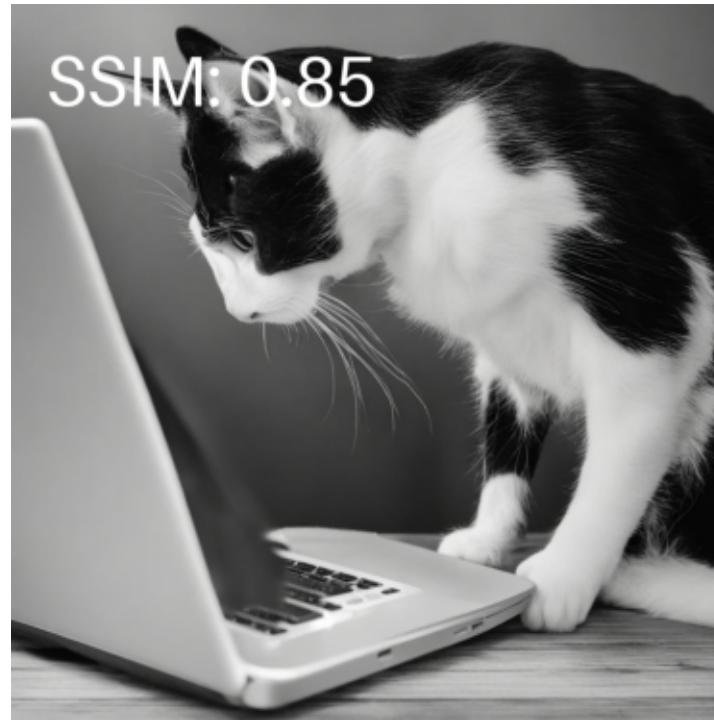

SSIM: 0.91

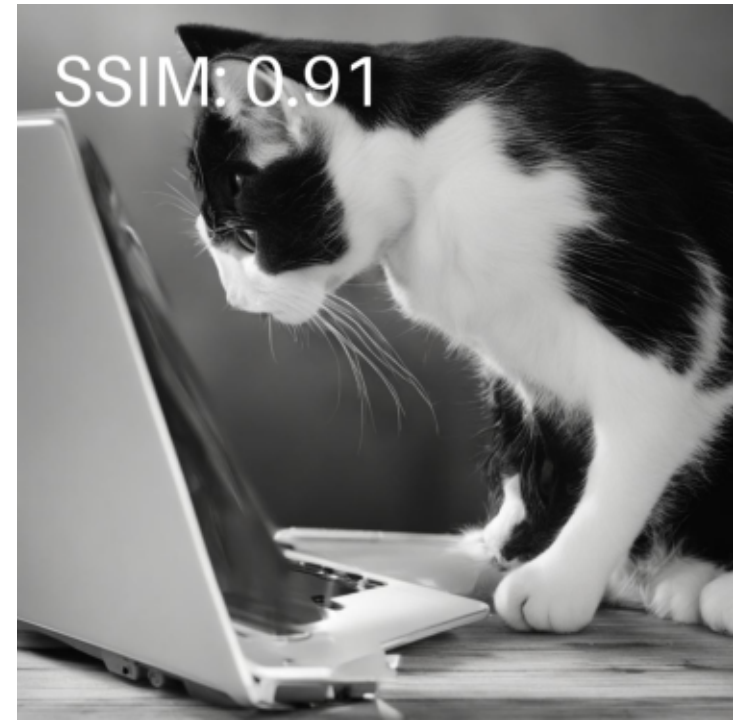

Supplement: supplementary_material [file attachment]
