# Supplementary material
Source: ML conference proceedings conference paper supplement (https://openreview.net/forum?id=nExUJBF5tR)
Supplement: supplementary_material [file attachment]

realistic car 3 d render sci - fi car and sci - fi robotic factory structure in the coronation of  
napoleon painting and digital billboard with point cloud in the middle, unreal engine 5, keyshot,  
octane, artstation trending, ultra high detail, ultra realistic, cinematic, 8 k, 1 6 k, in style of  
zaha hadid, in style of nanospace michael menzelincev, in style of lee souder, in plastic, dark  
atmosphere, tilt shift, depth of field,

FP32

M453

16

+WSR(p=4)

Step 40

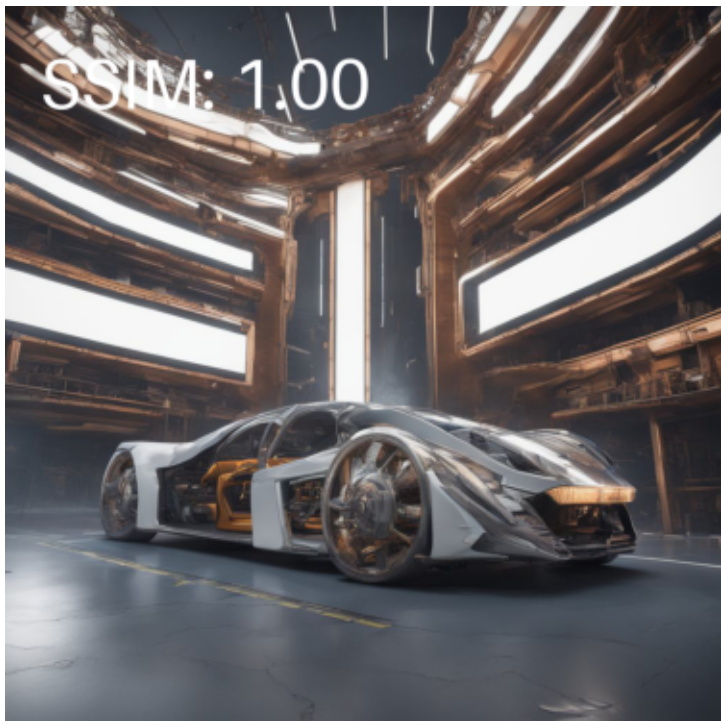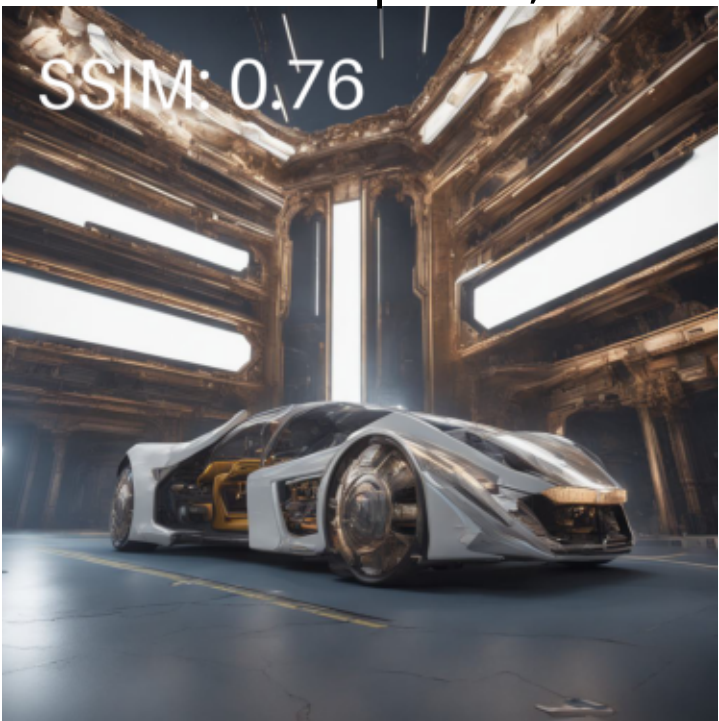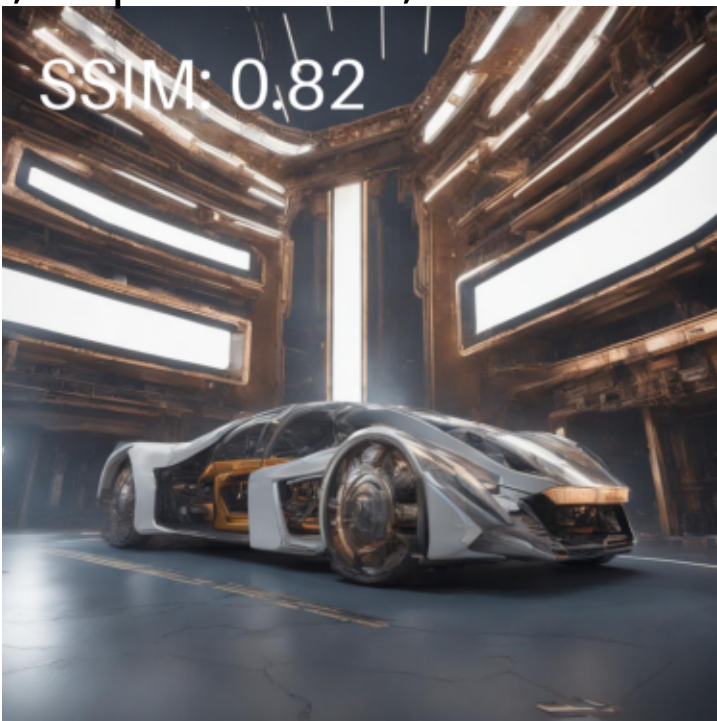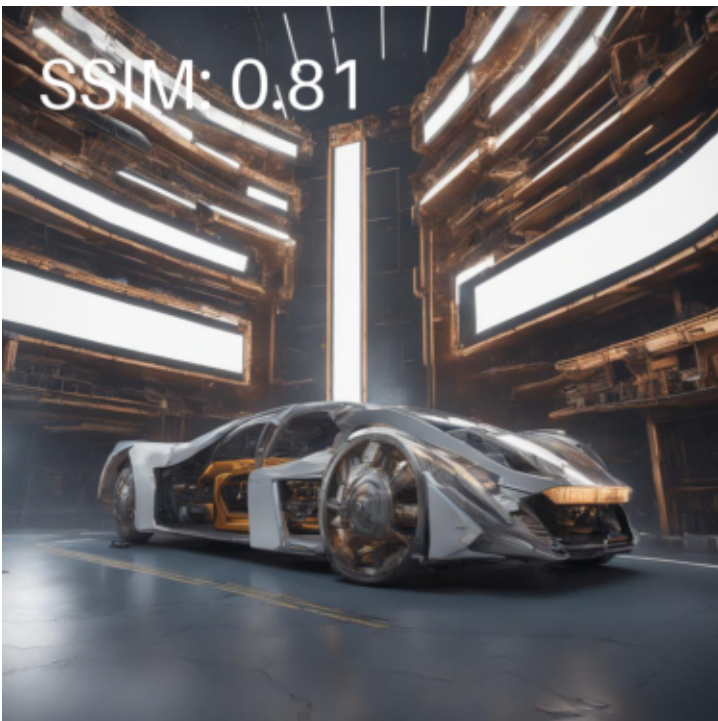

Step 100

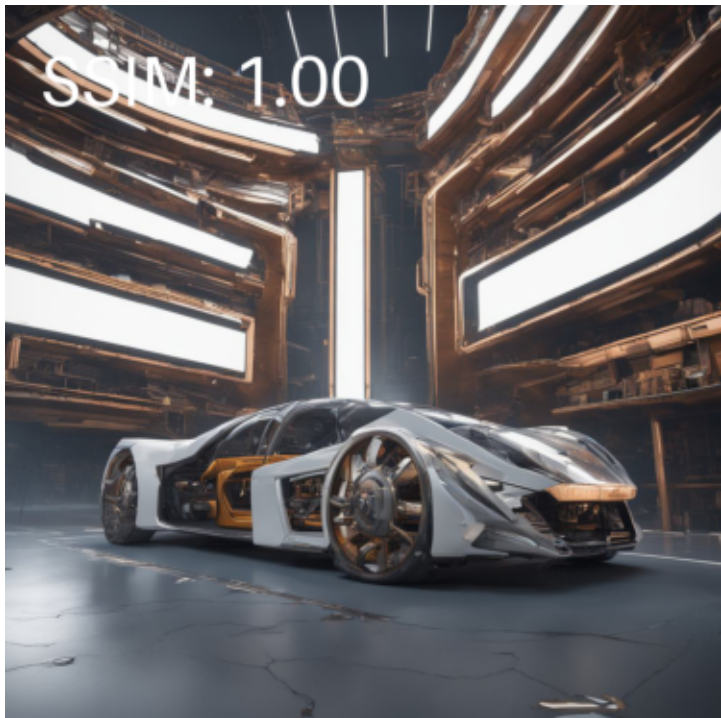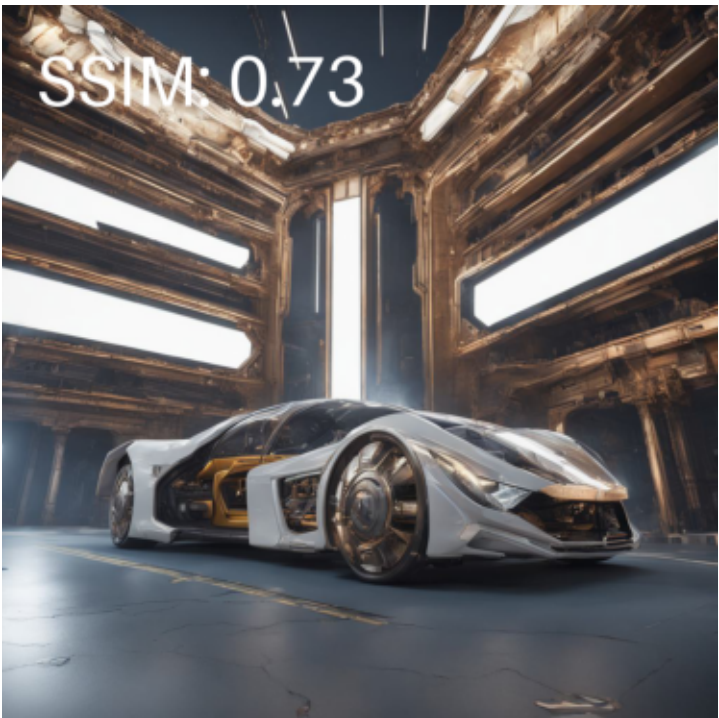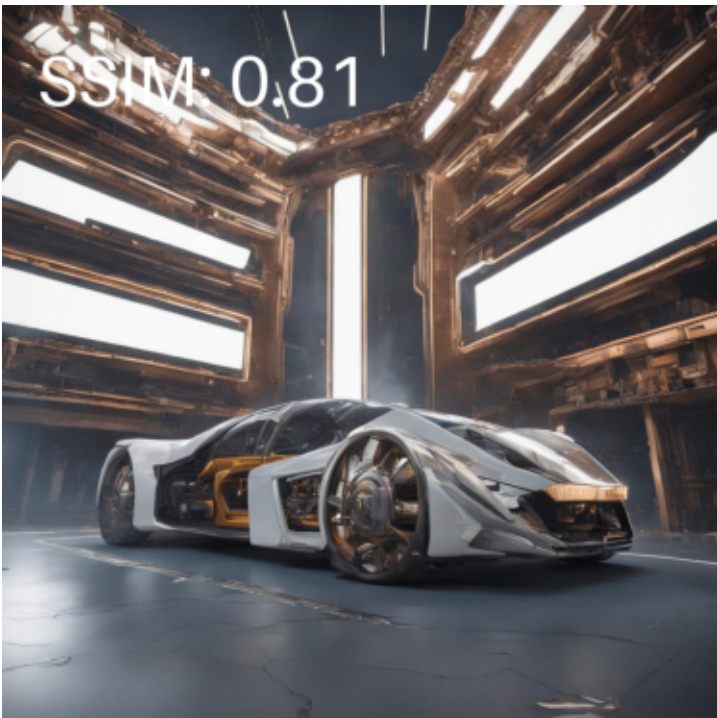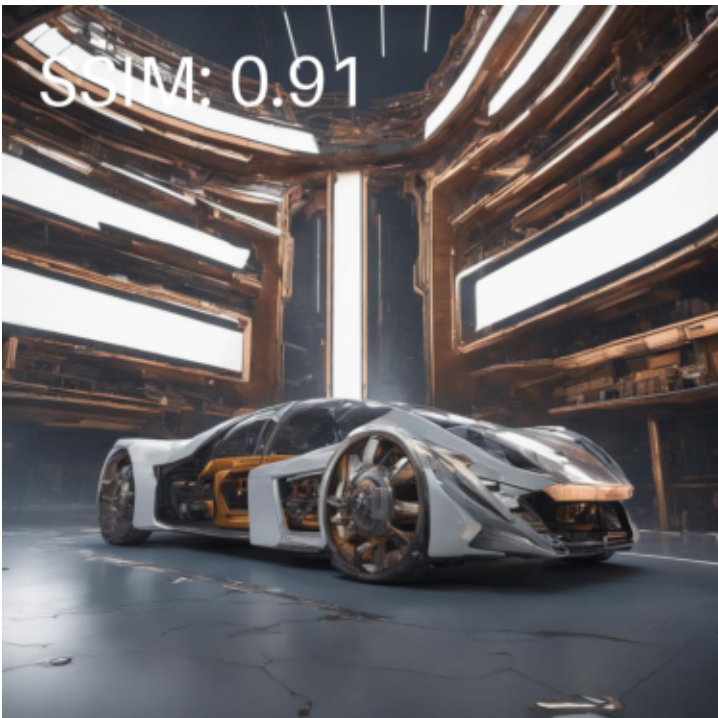

Step 200

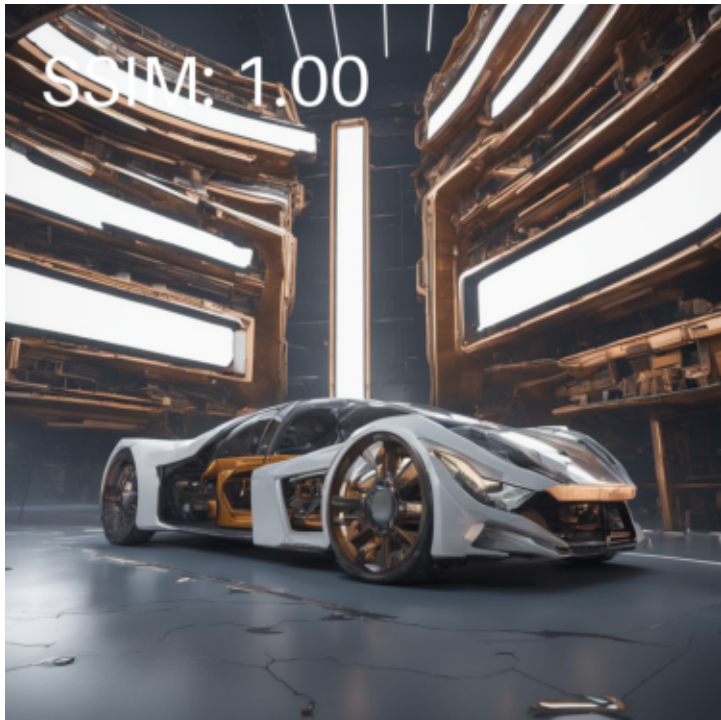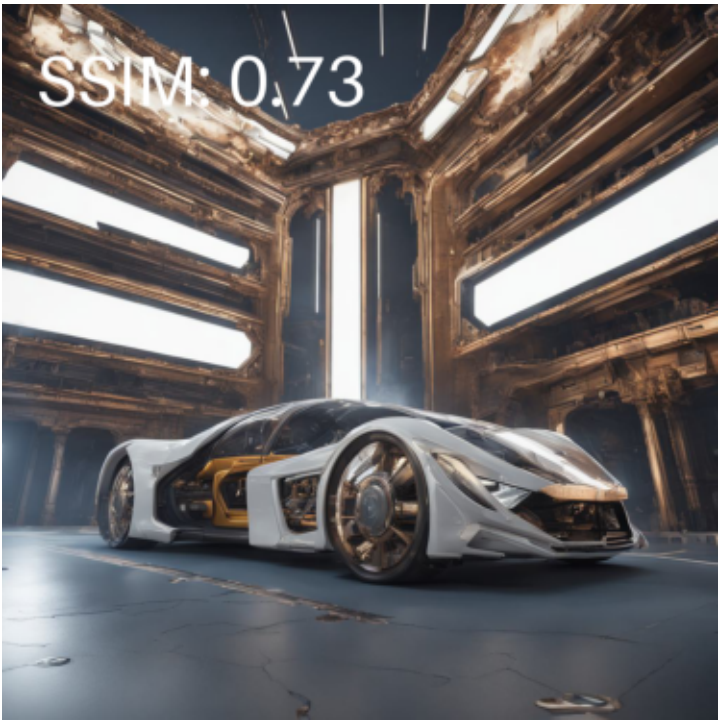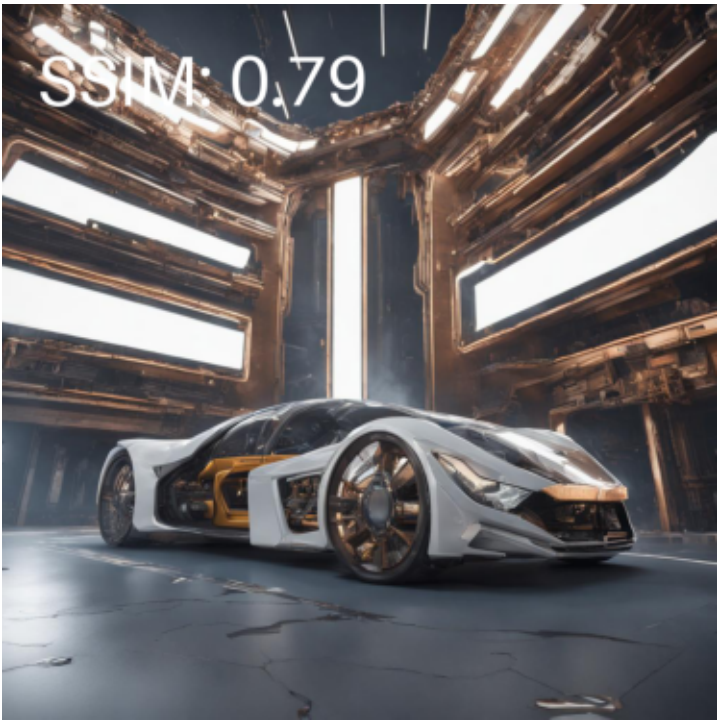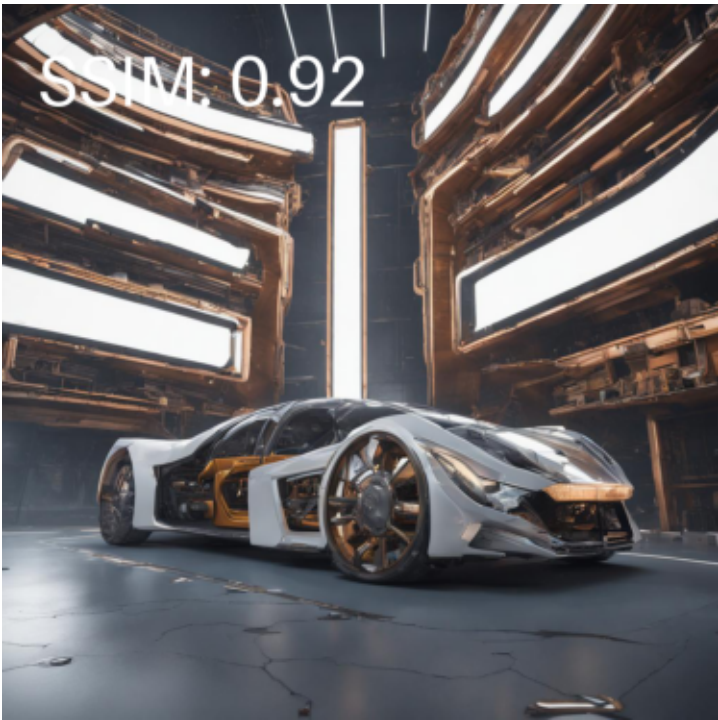



beautiful victorian raven digital painting, art by artgerm and greg rutkowski, alphonse mucha, cgsociety

FP32

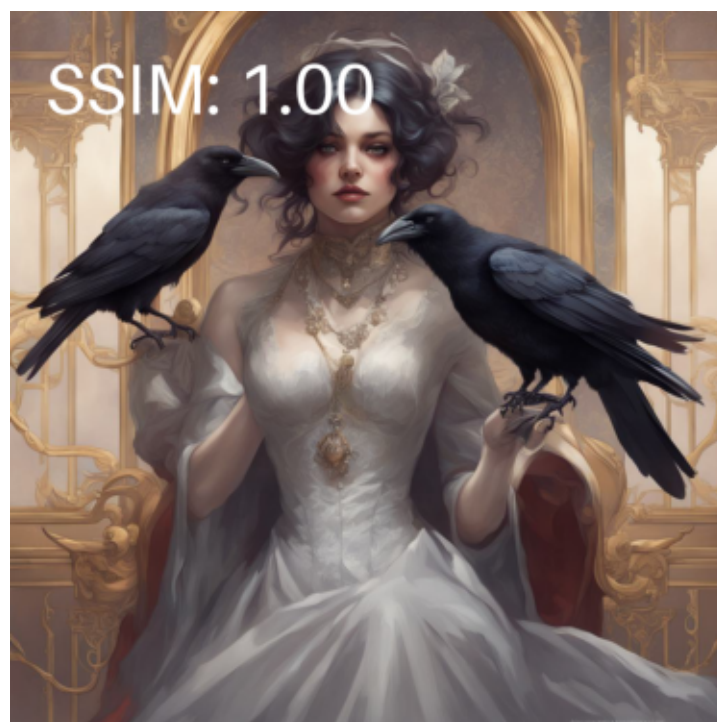

M4E3

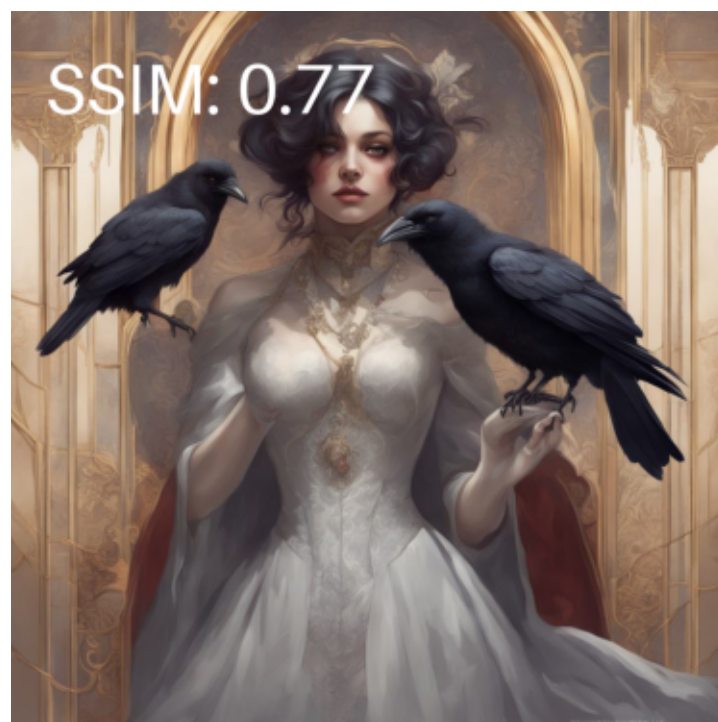

+SR

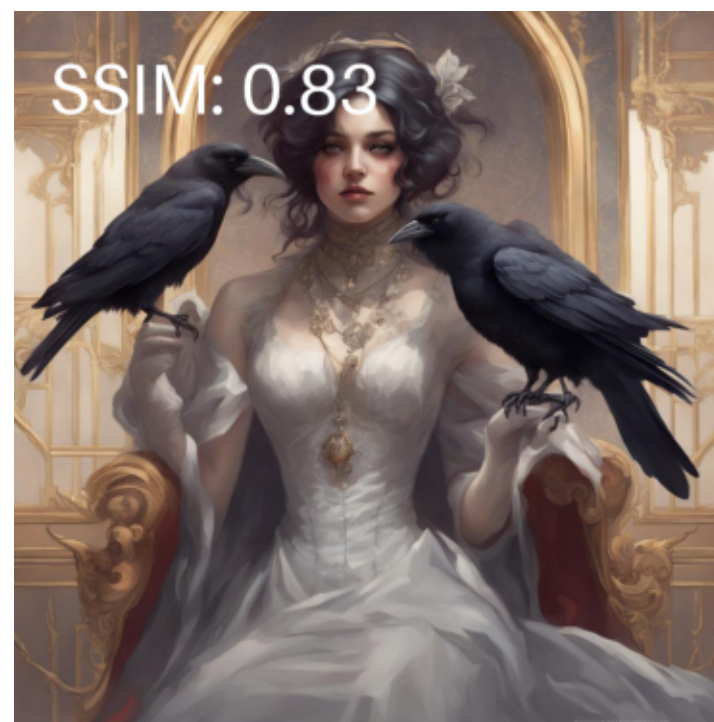

+WSR(p=4)

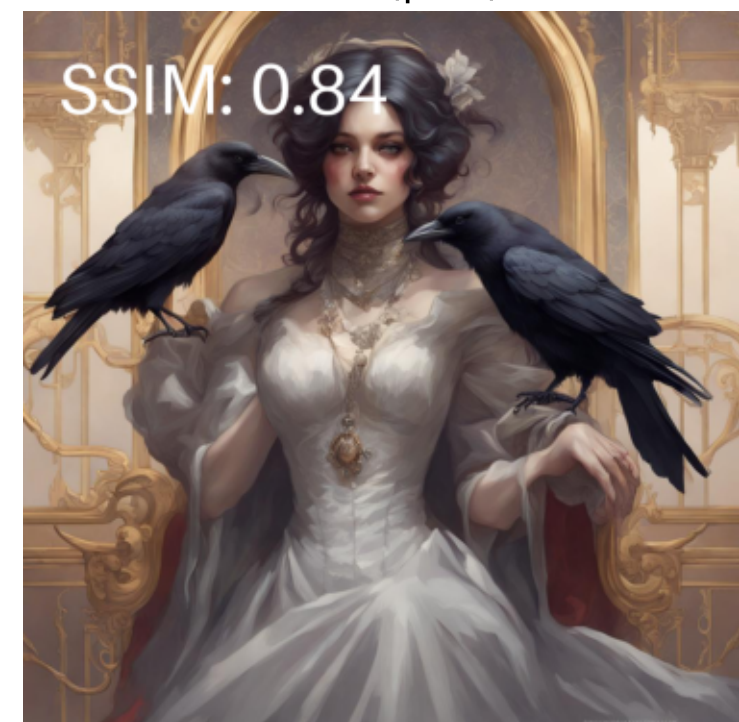

Step 40

SSIM: 1.00

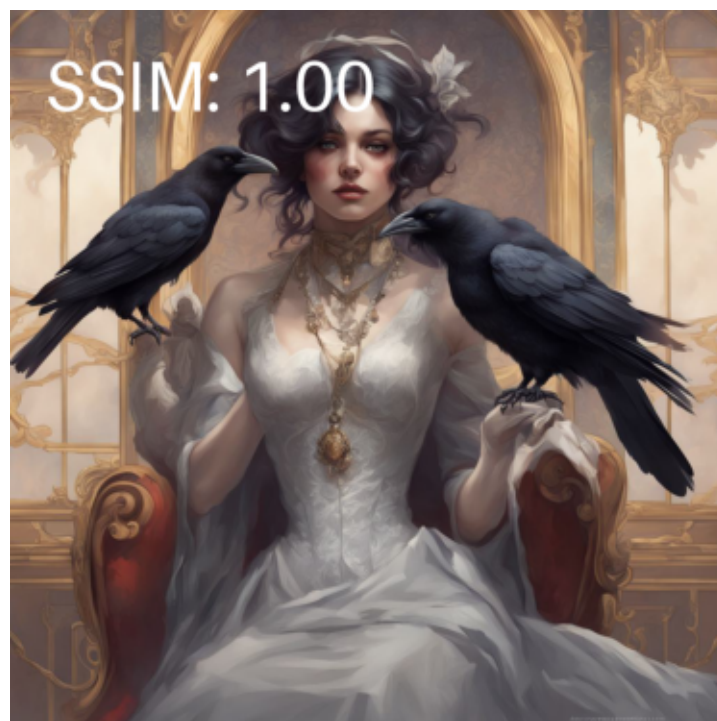

SSIM: 0.73

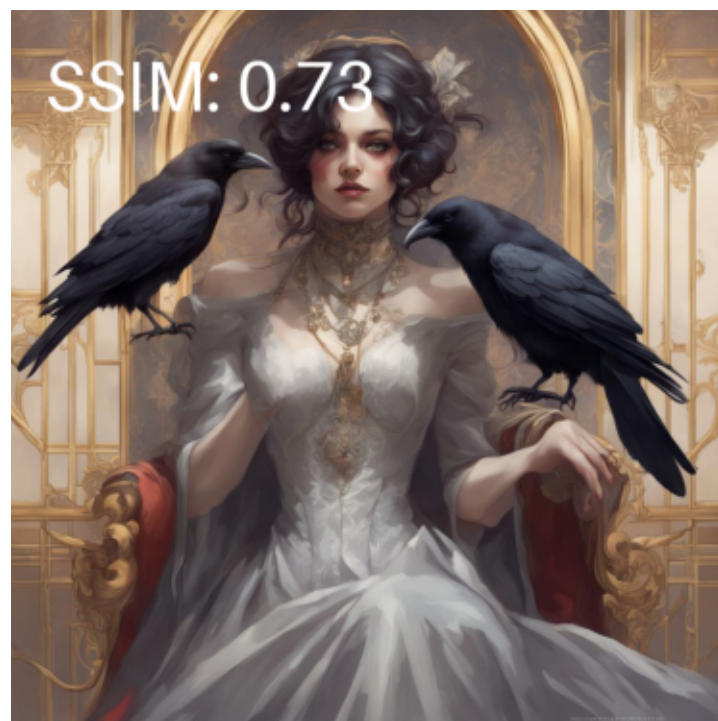

SSIM: 0.83

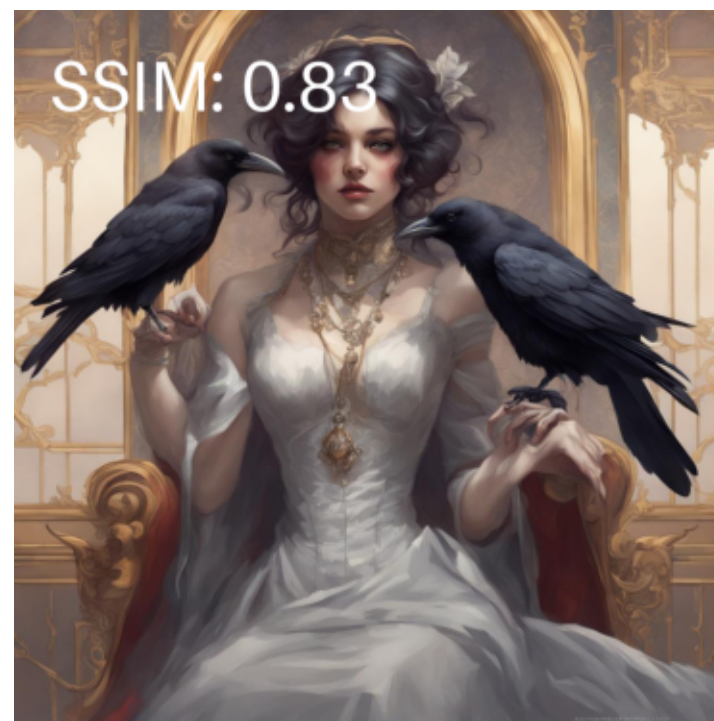

SSIM: 0.80

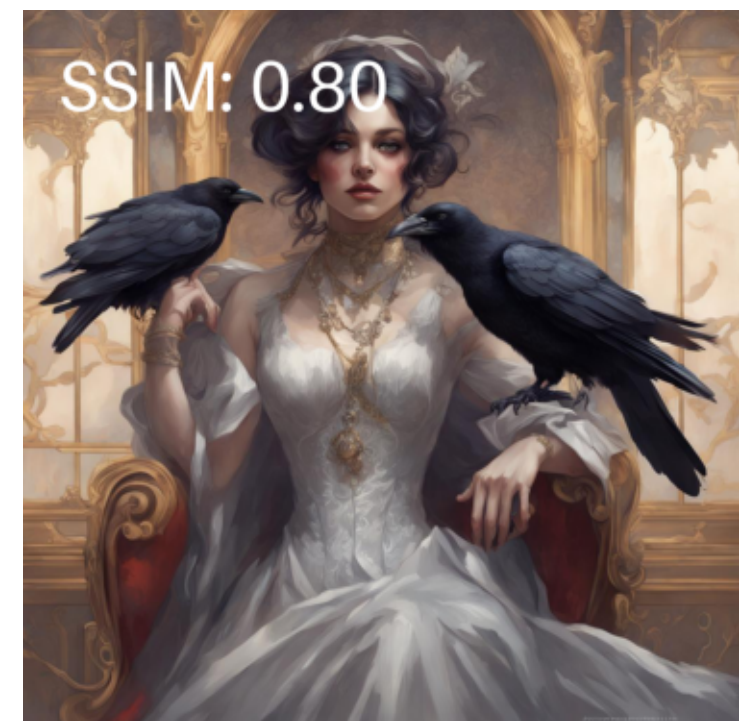

Step 100

SSIM: 1.00

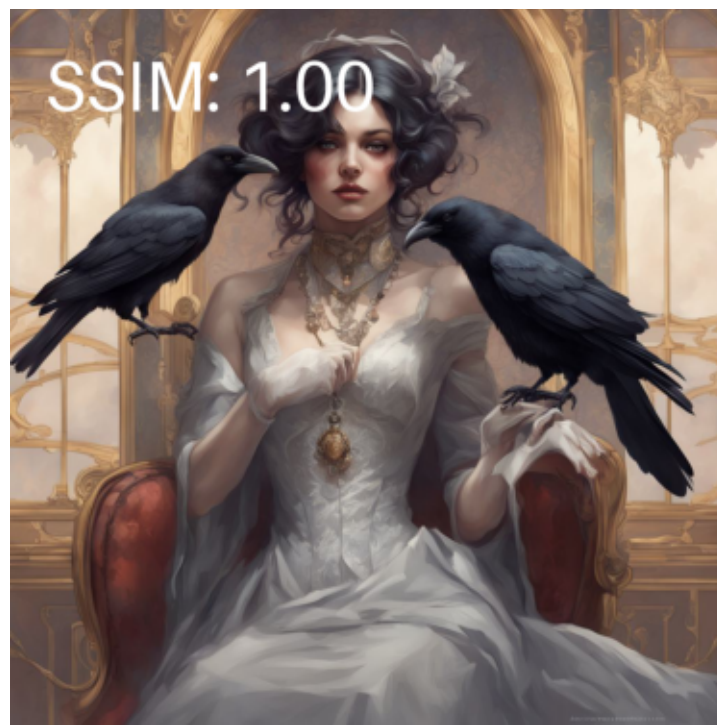

SSIM: 0.75

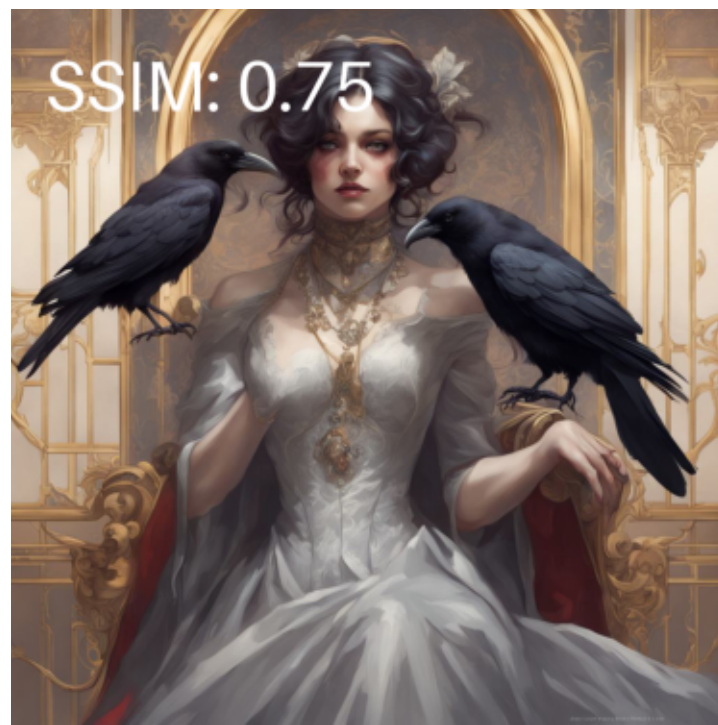

SSIM: 0.82

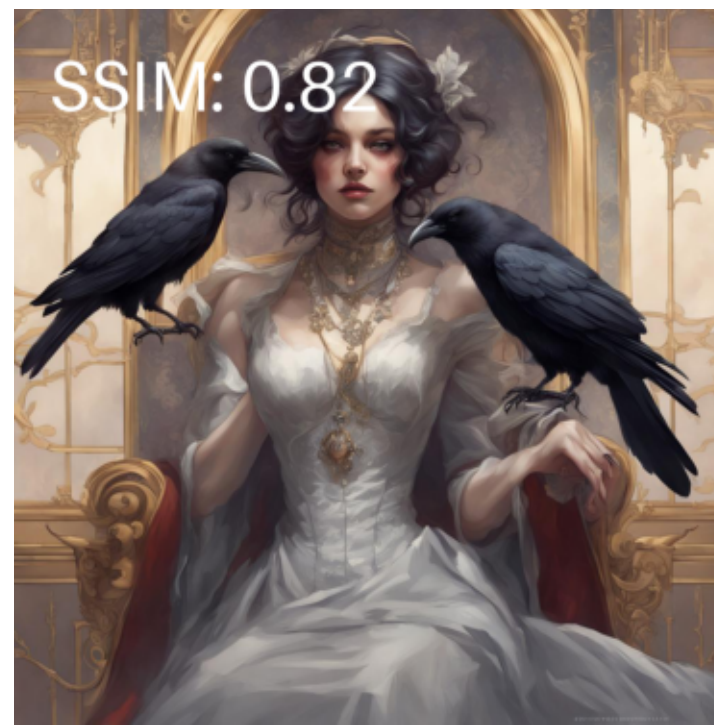

SSIM: 0.80

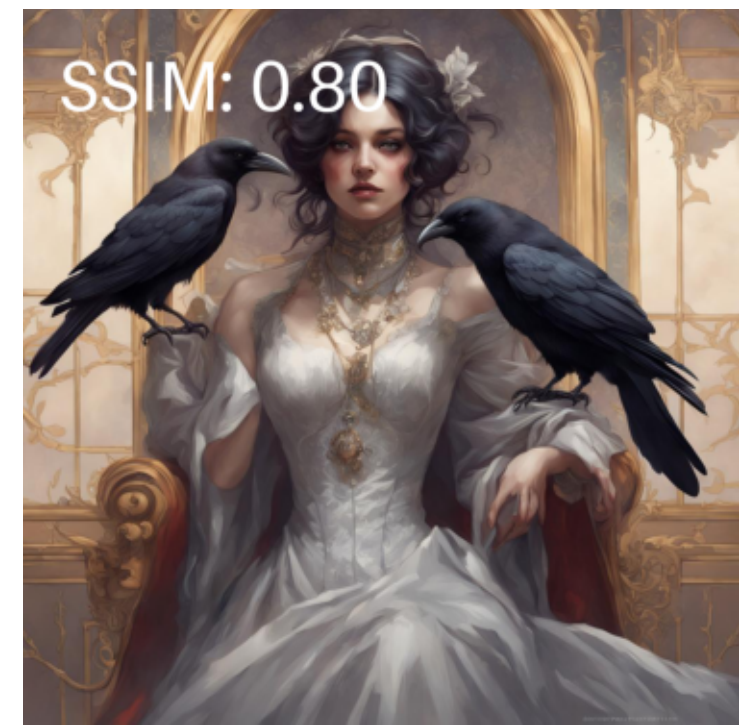

Step 200



violet demonic card game decorative frame, violet decorative frame, card game artwork frame. 8 k, sharp high quality artwork in style of jose daniel cabrera pena and greg rutkowski, concept art, blizzard warcraft artwork, hearthstone artwork, blue sea theme

FP32

M4E3

+SR

+WSR(p=4)

Step 40

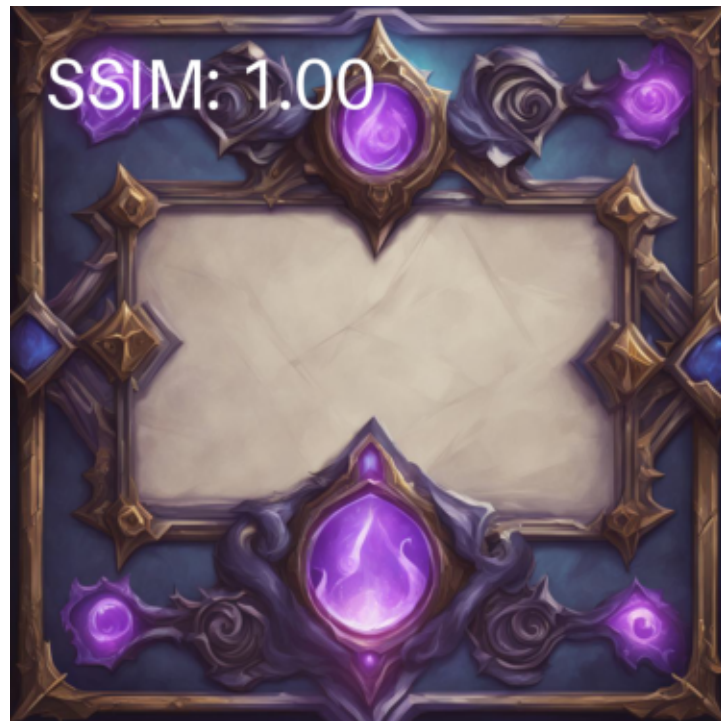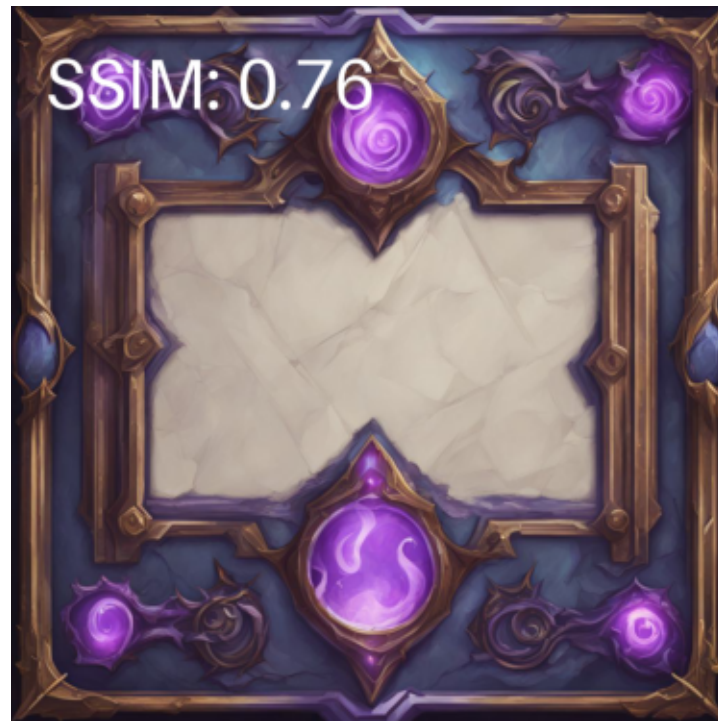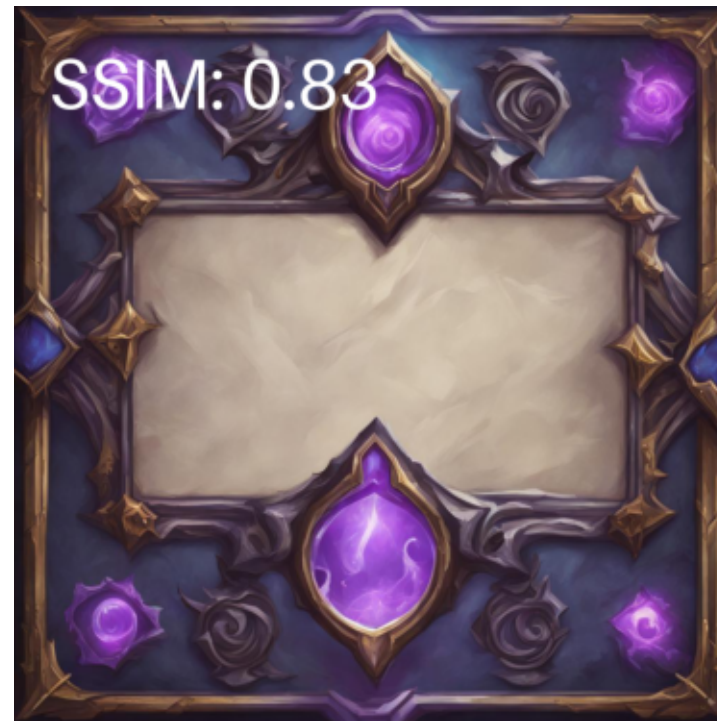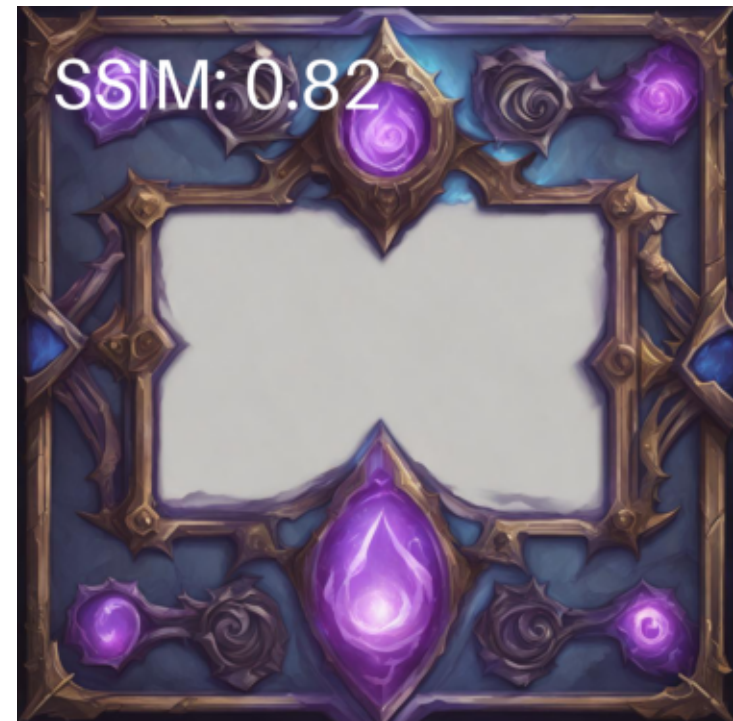

Step 100

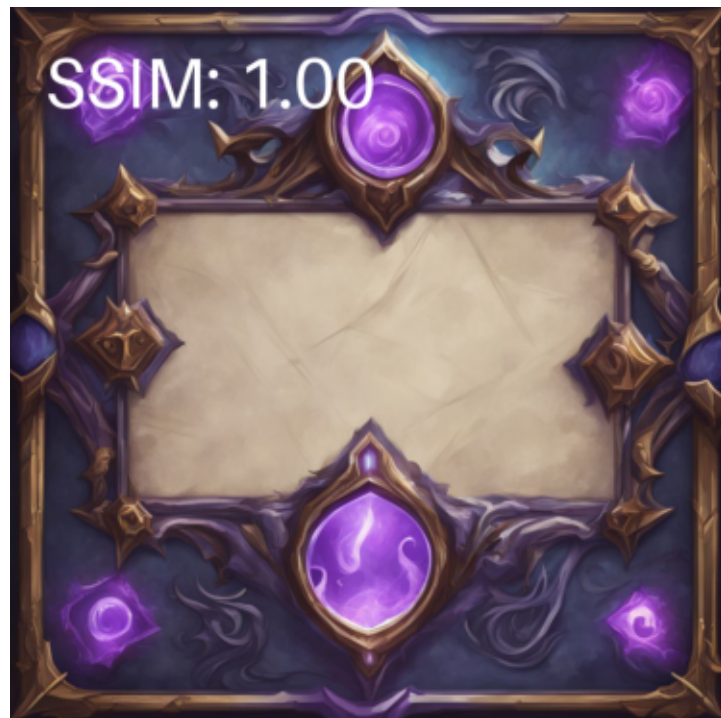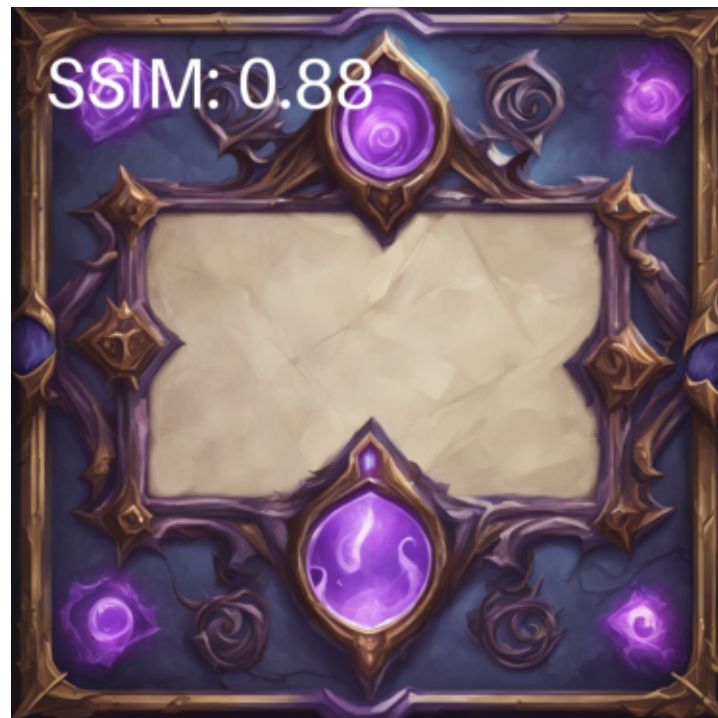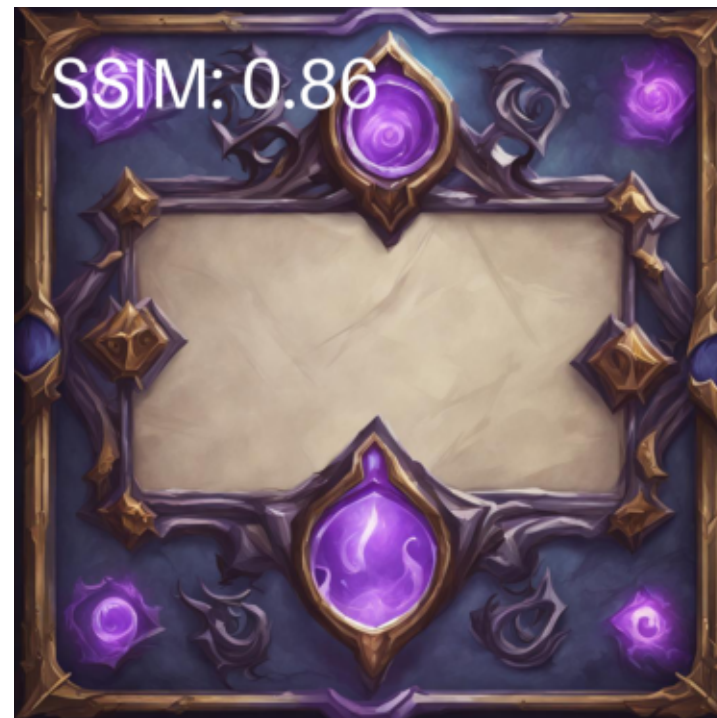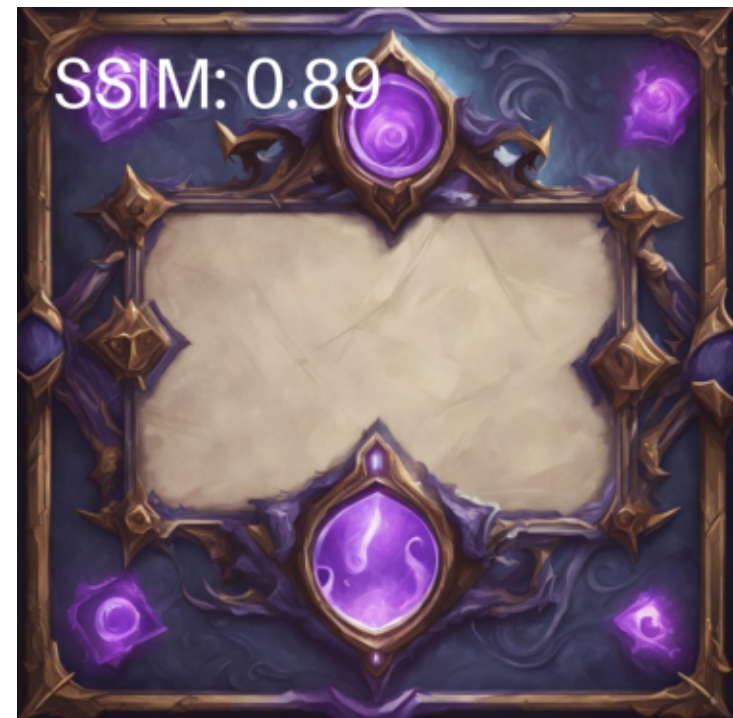

Step 200

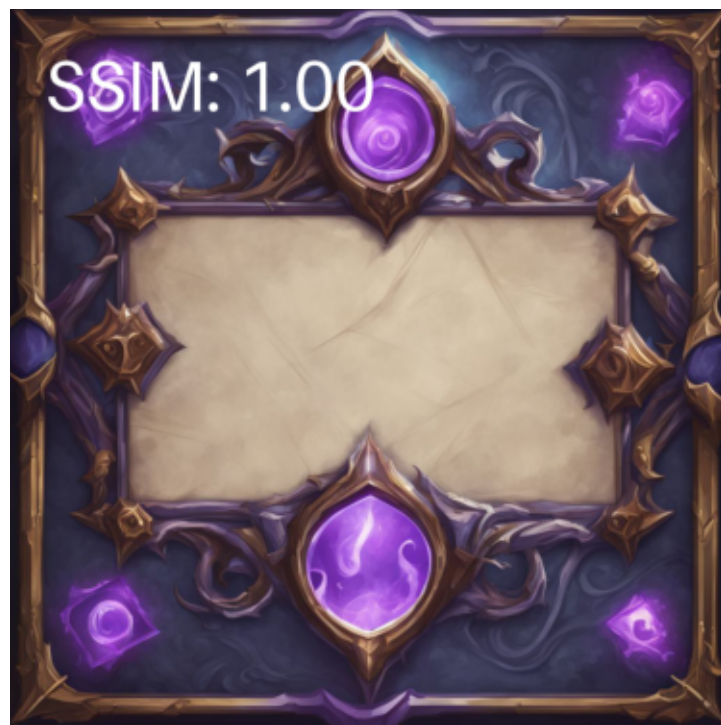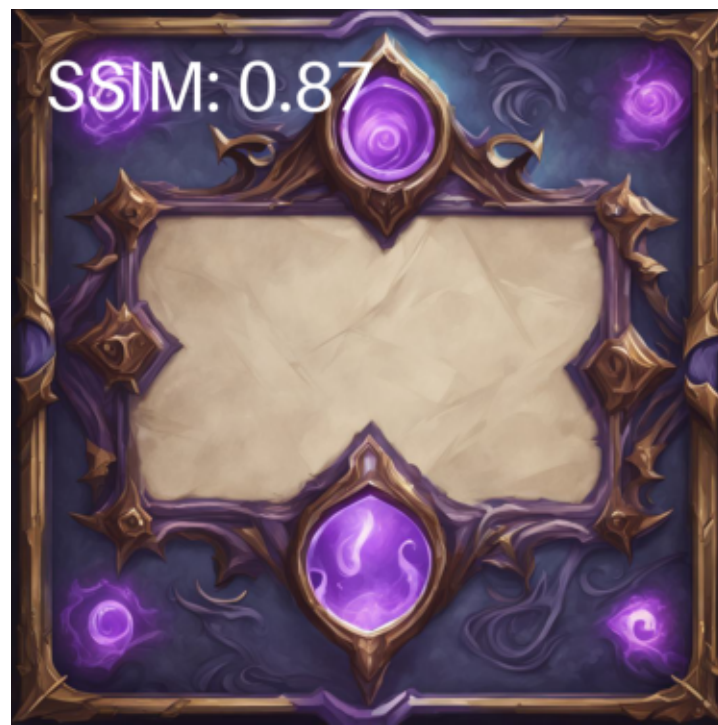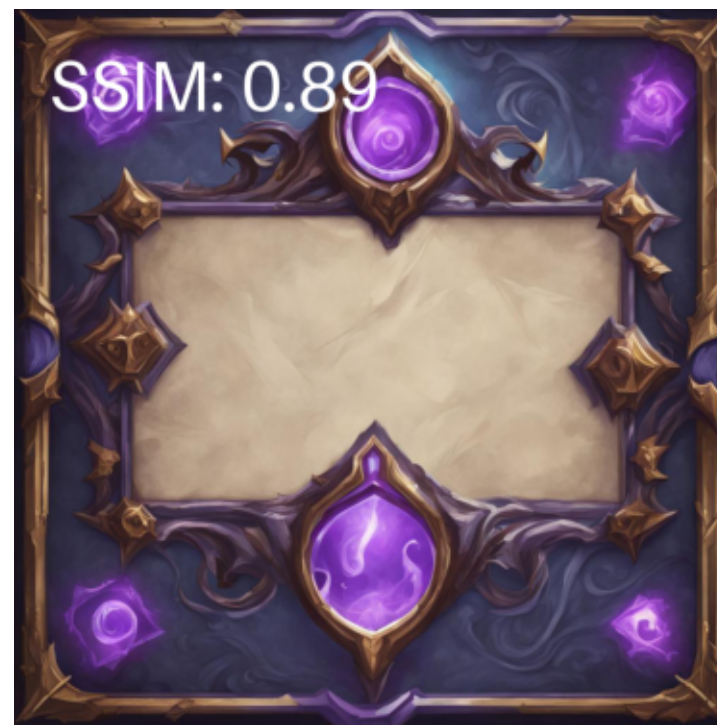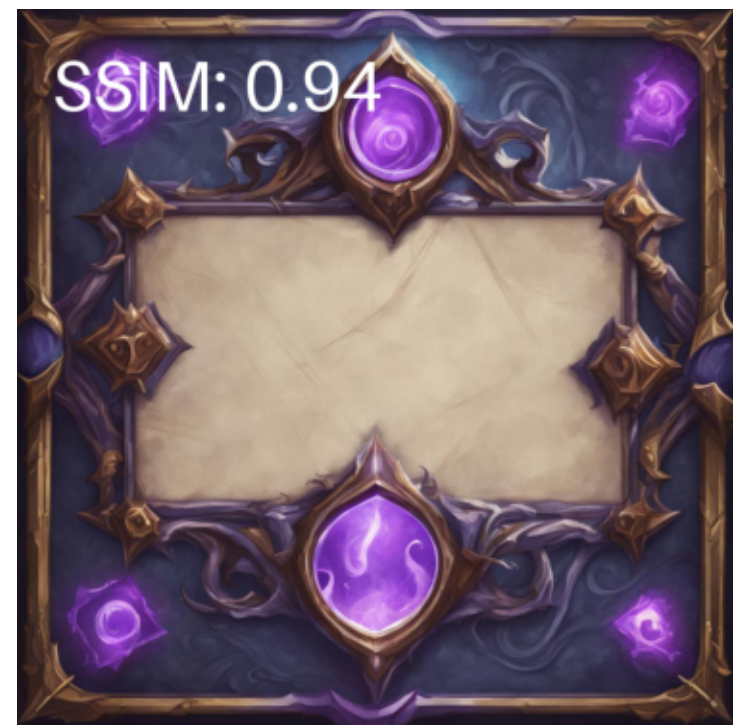



a black and white edward gorey illustration of a man in old fashioned clothes waits by the side of the mountain road with his suitcase, looking at a coach with 4 horses is in front of him, stormy night time in the mountains highly detailed in the style of edward gorey, artgerm, 8 k resolution - c 5

FP32

M4E3

+SR

+WSR(p=4)

Step 40

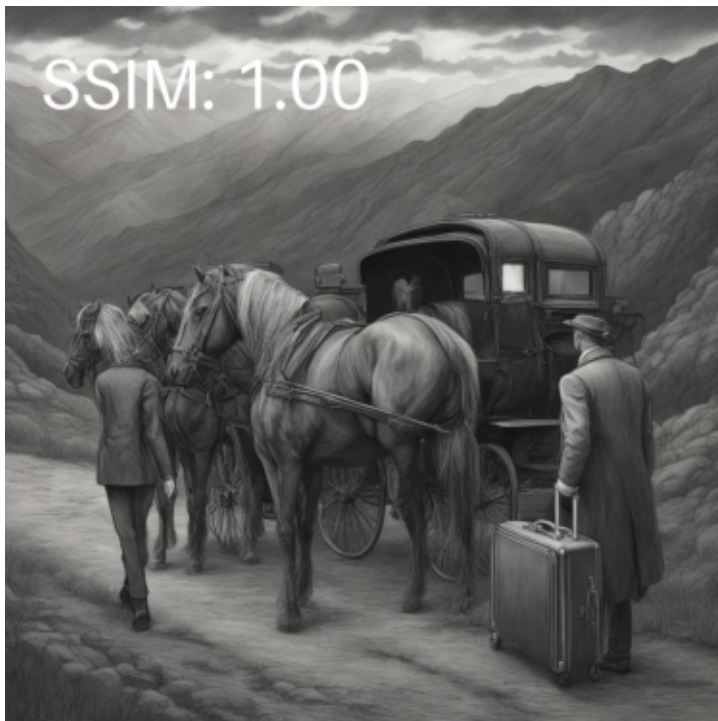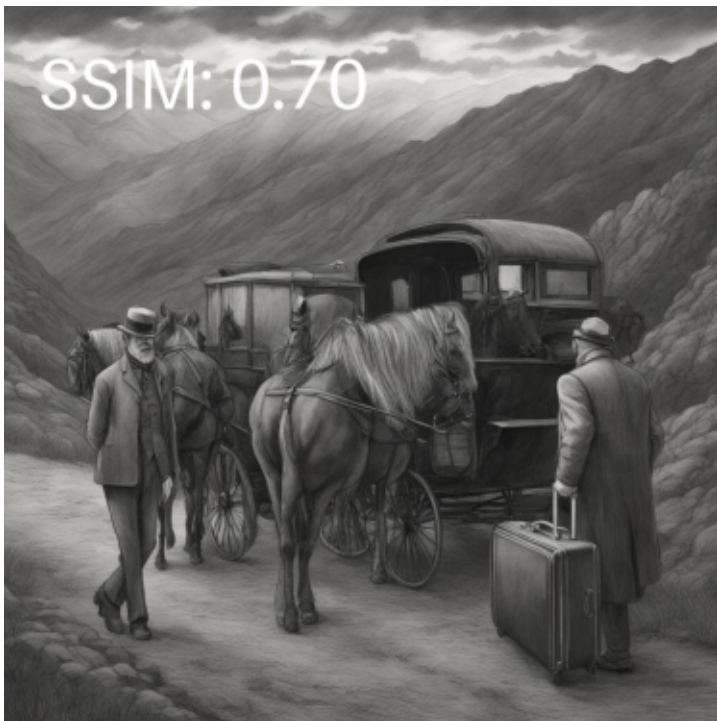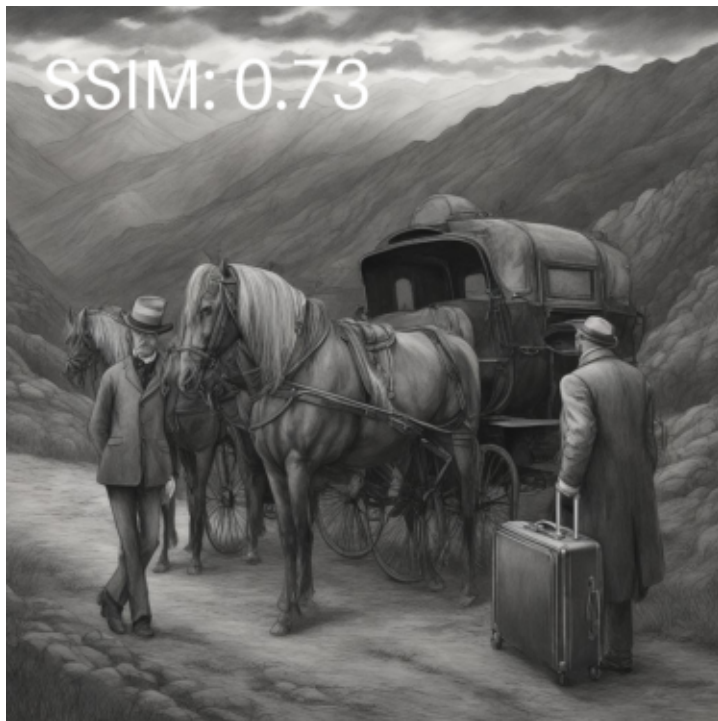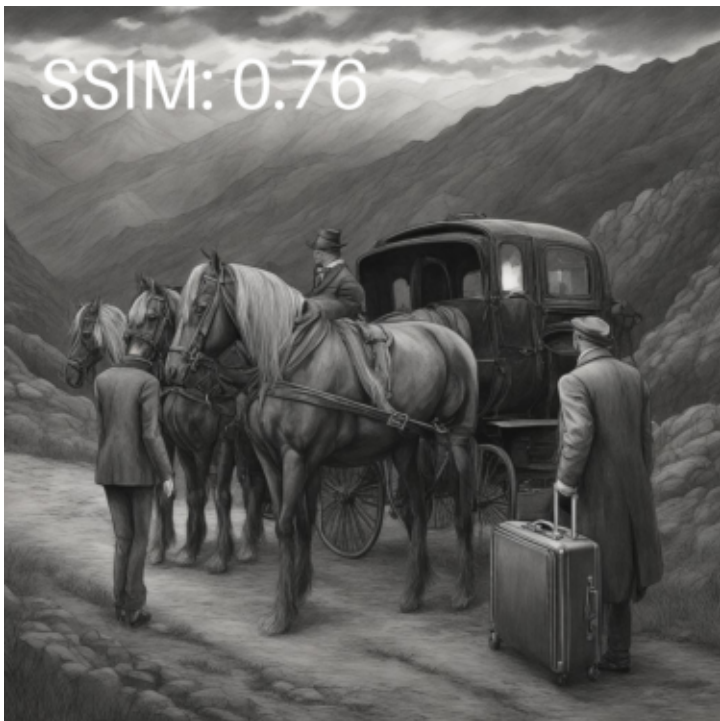

Step 100

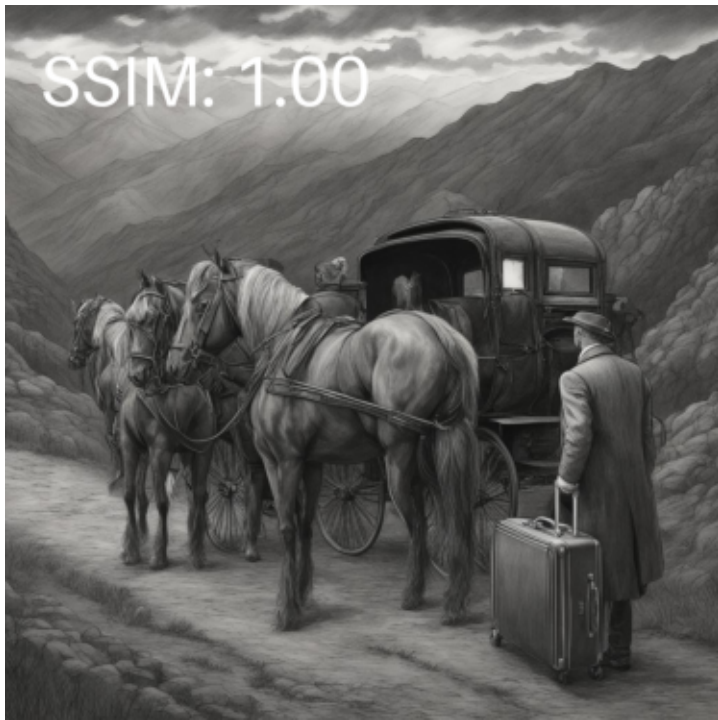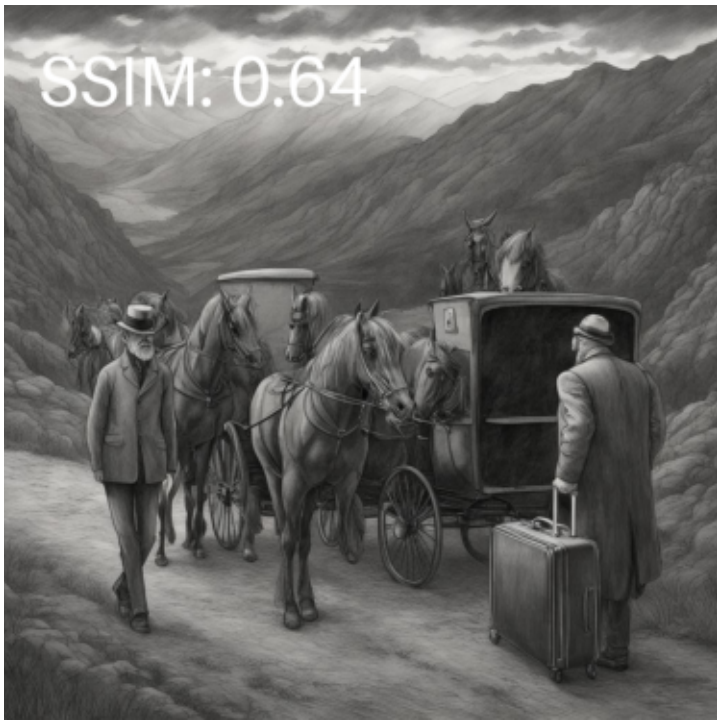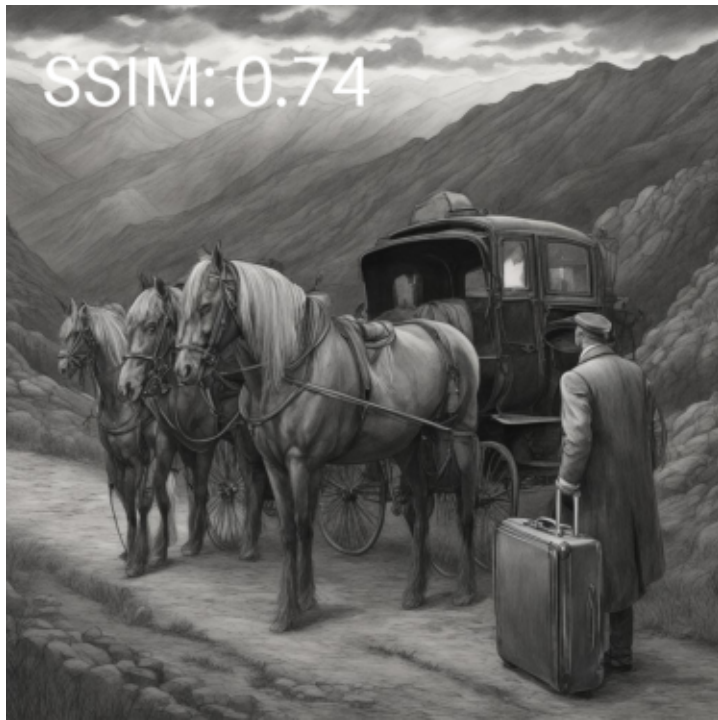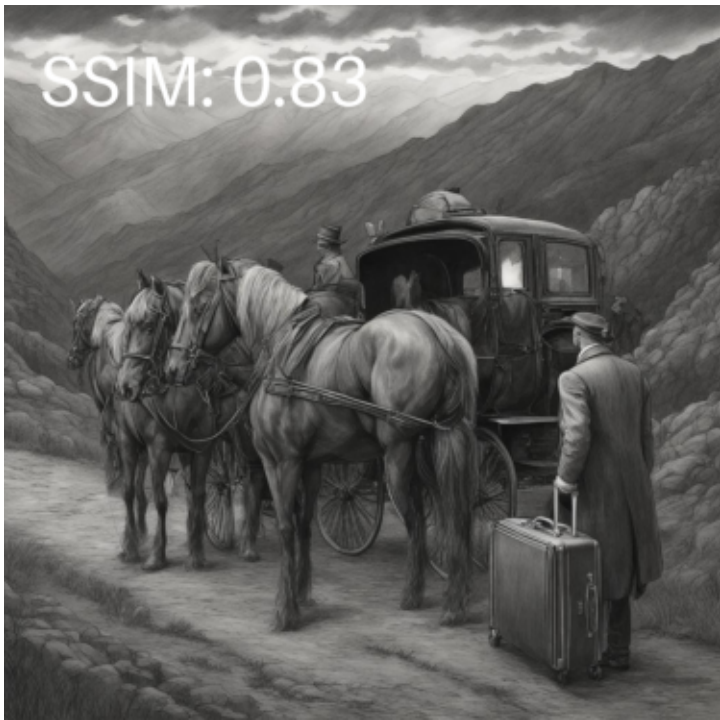

Step 200

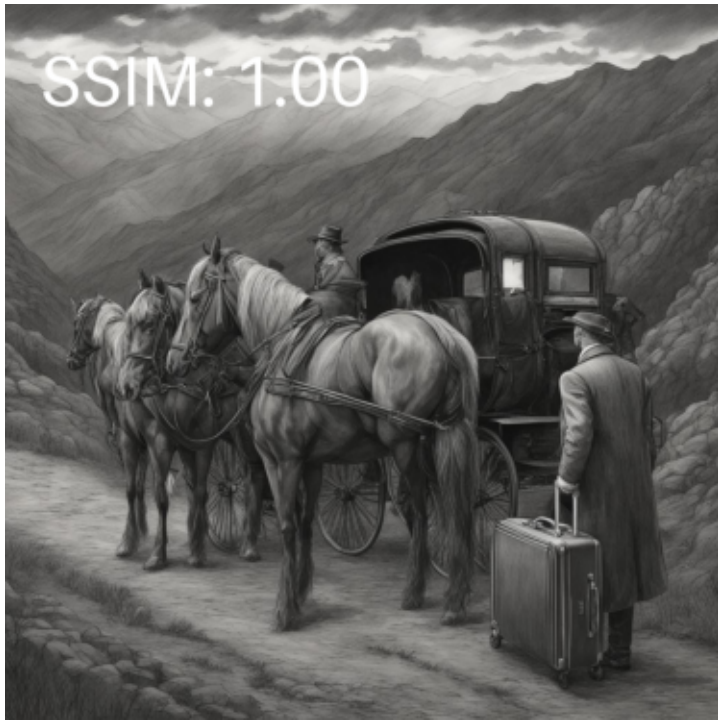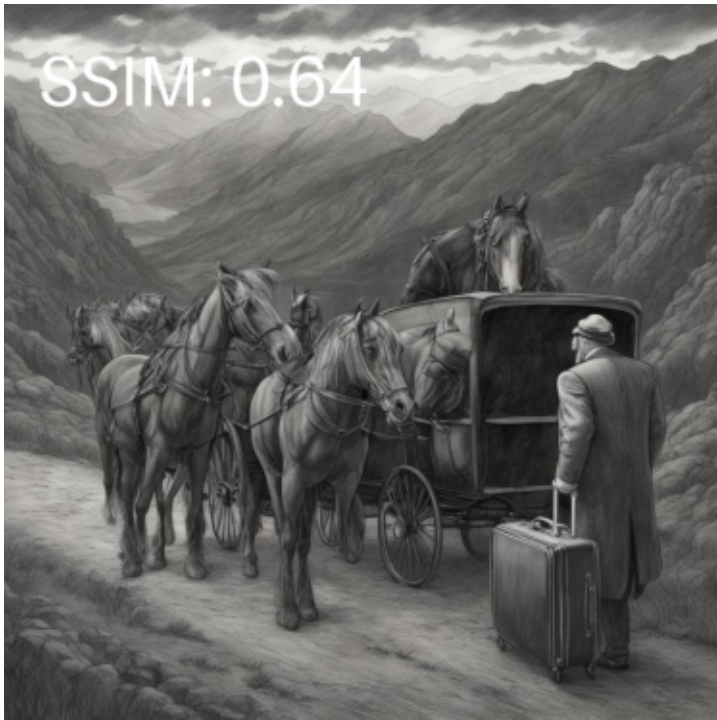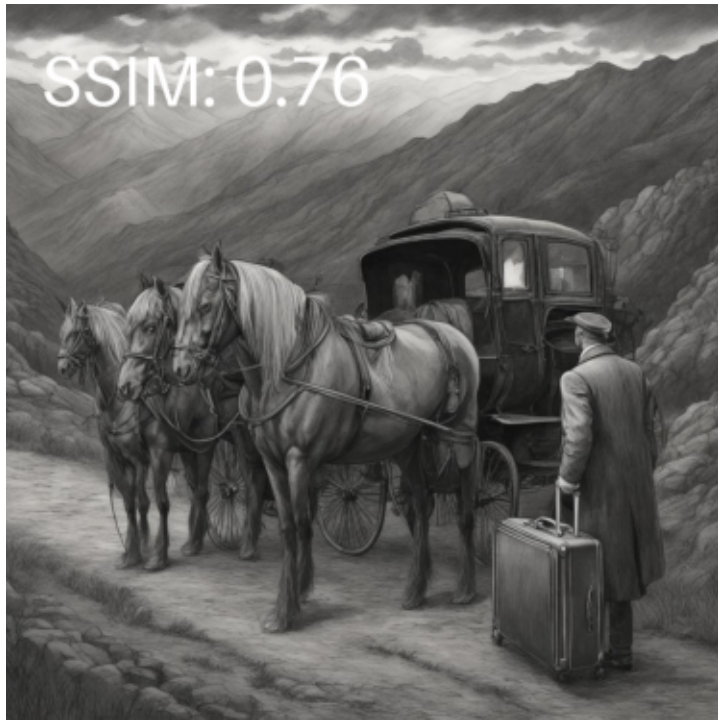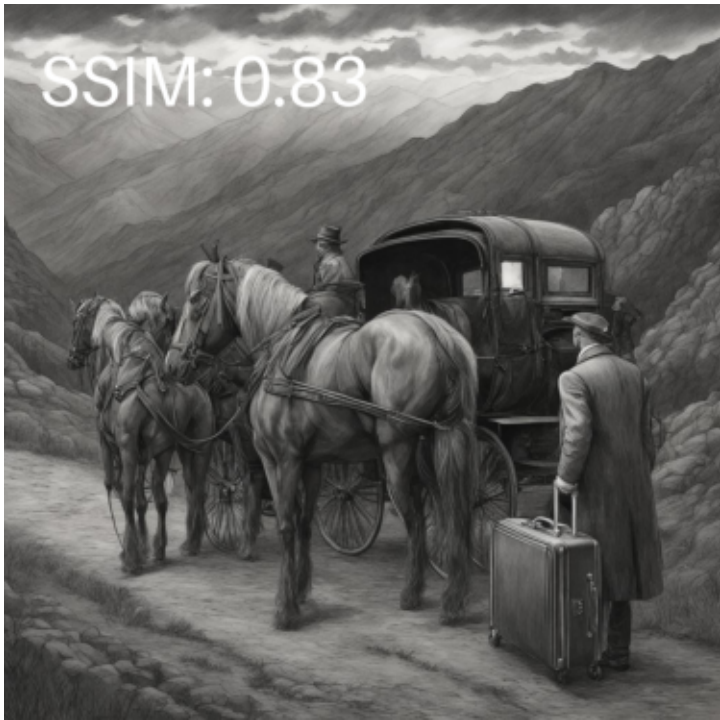



nature landscape, aerial view, drone photography, cinematic, mountains and ocean, cinematic view,  
epic sky, detailed, concept art, high detail, warm lighting, volumetric, godrays, vivid, beautiful,  
trending on artstation, by jordan grimmer, art greg rutkowski

FP32

M4E3

+SR

+WSR(p=4)

Step 40

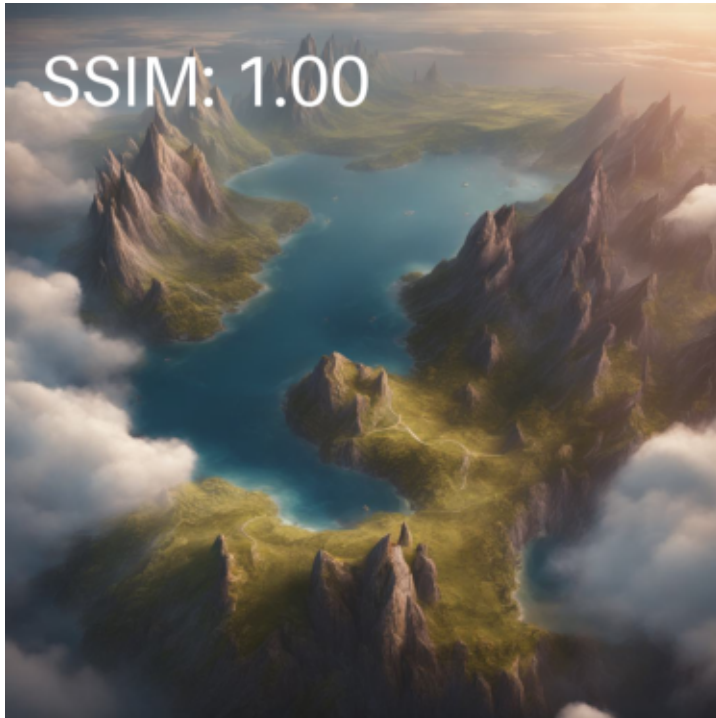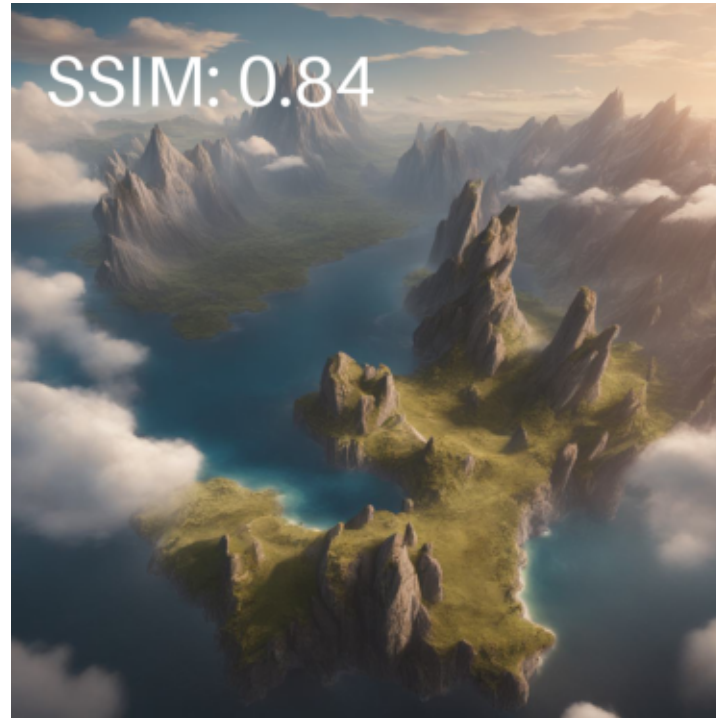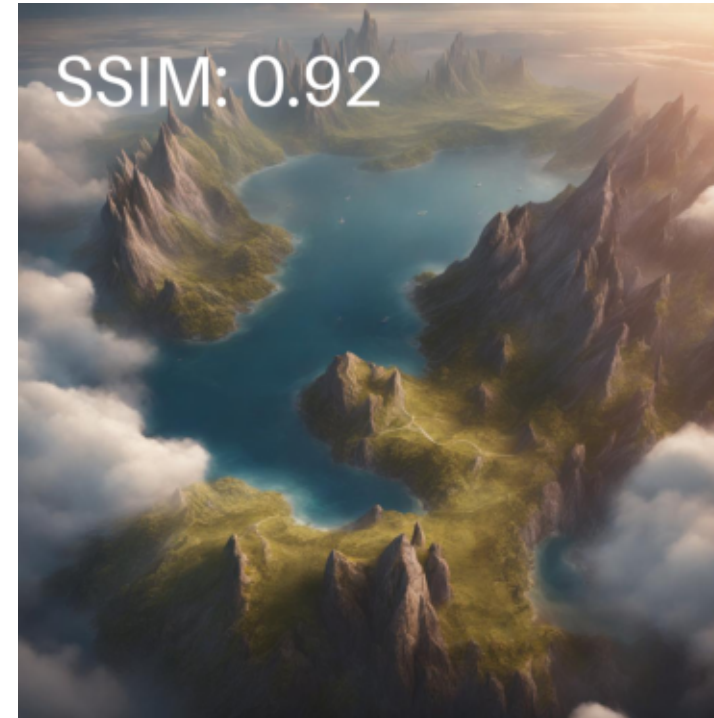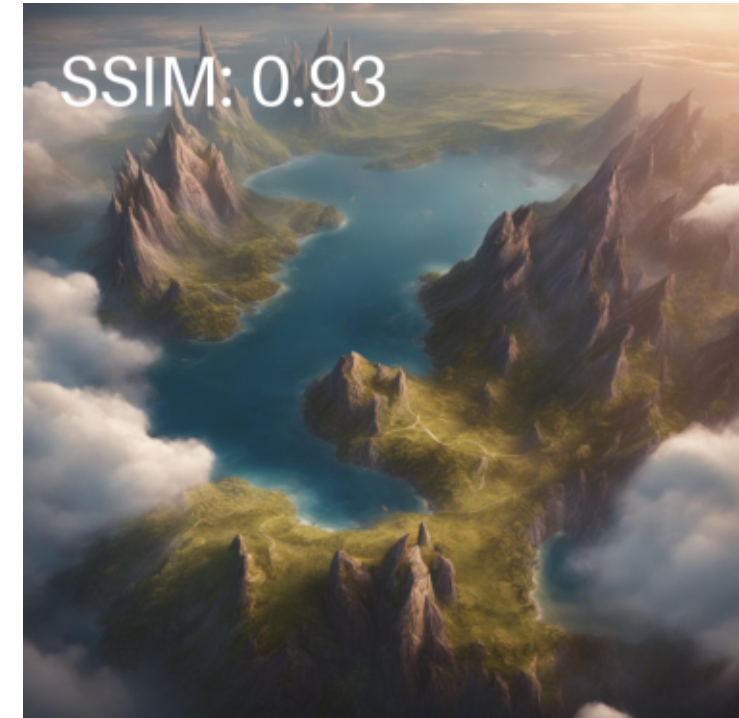

Step 100

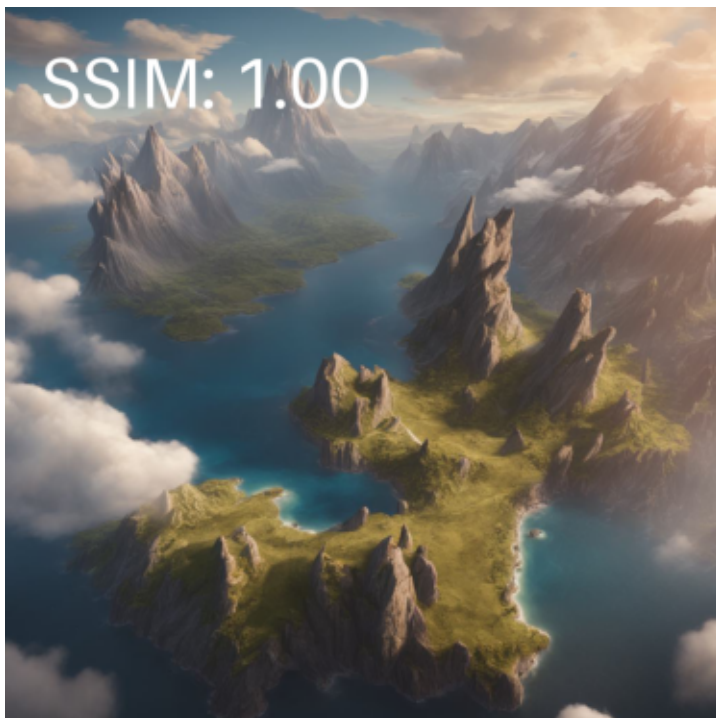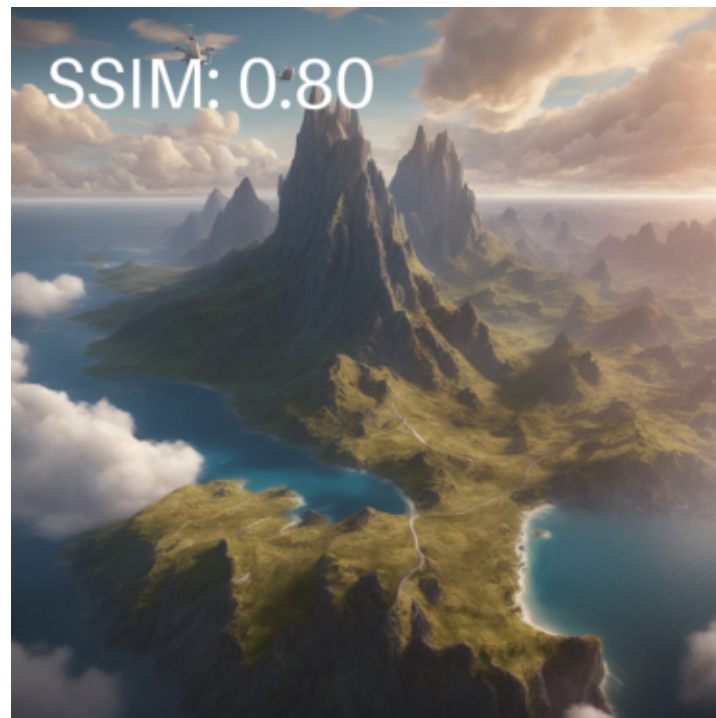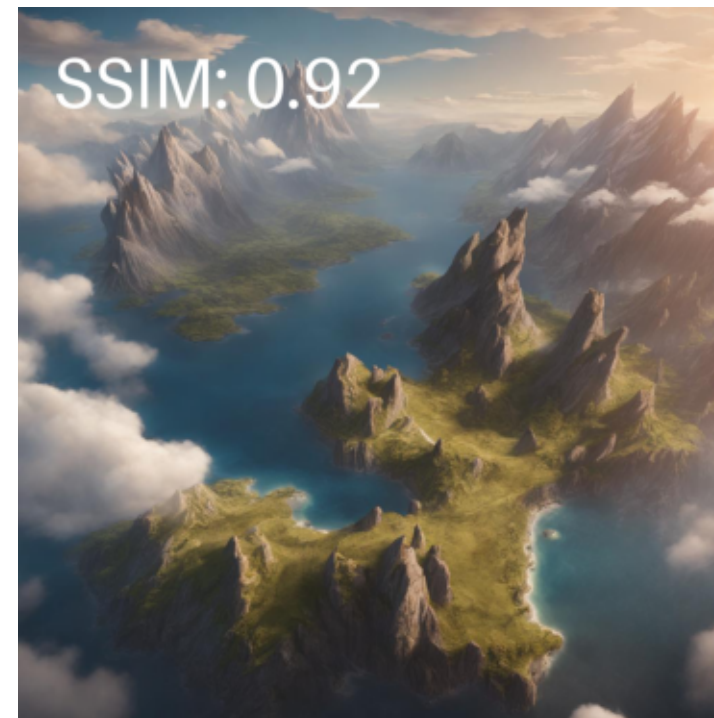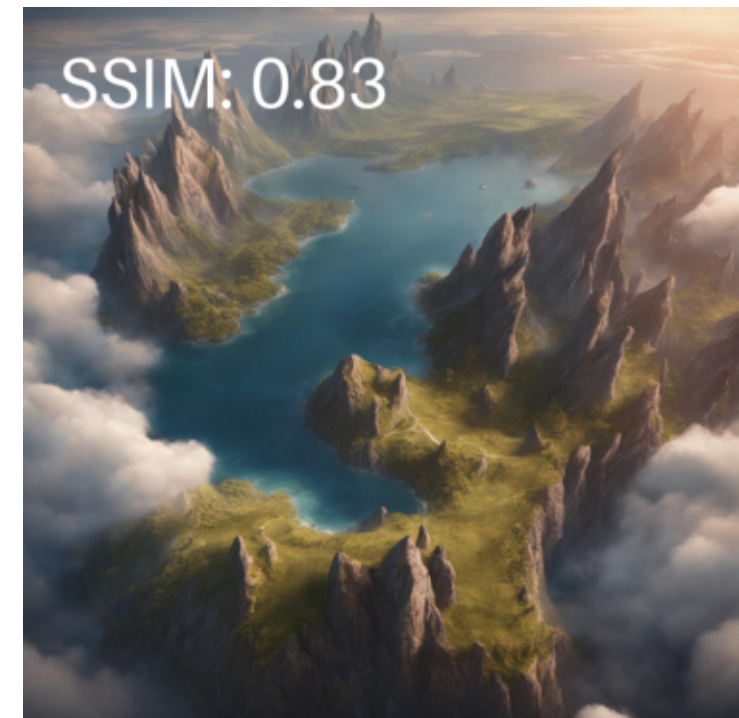

Step 200

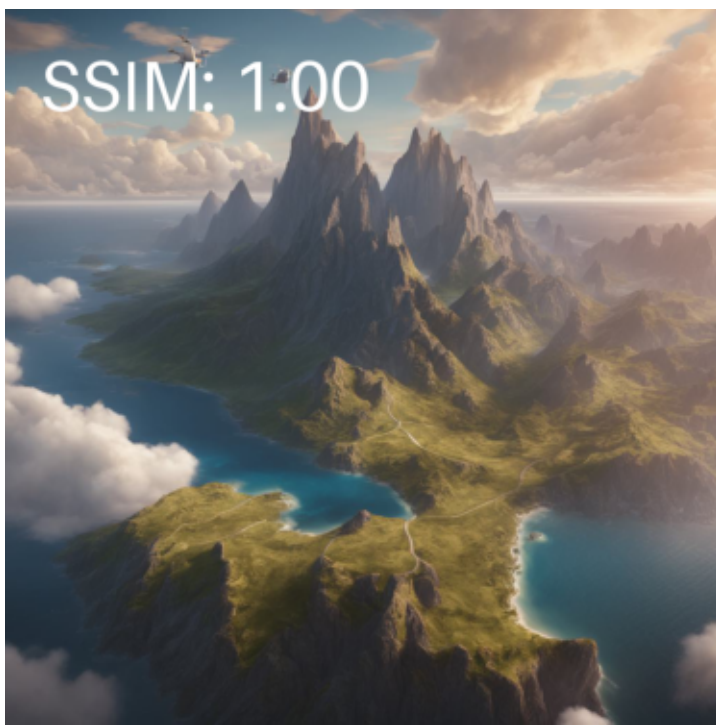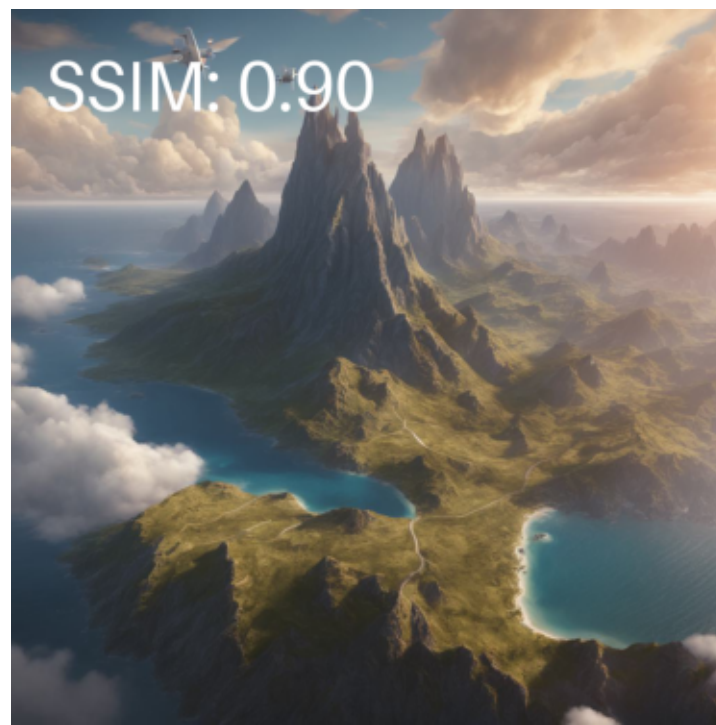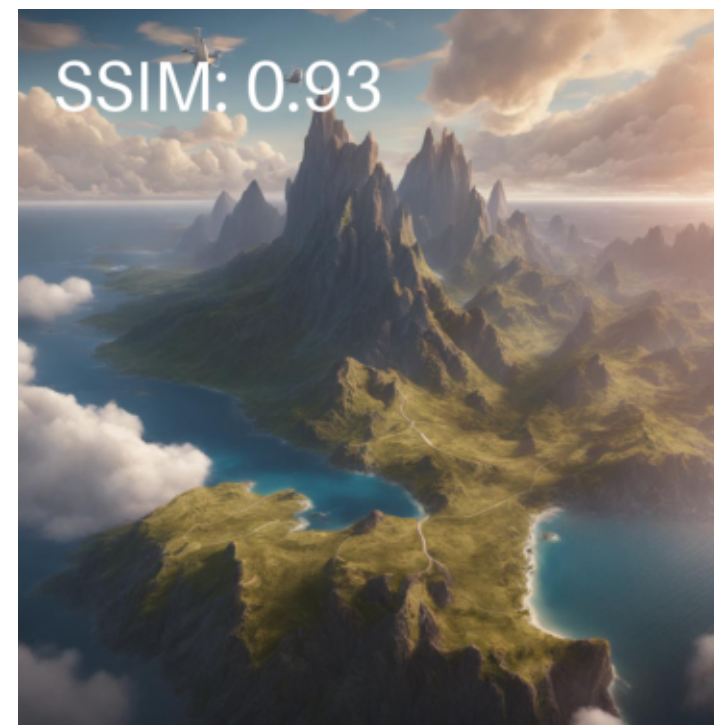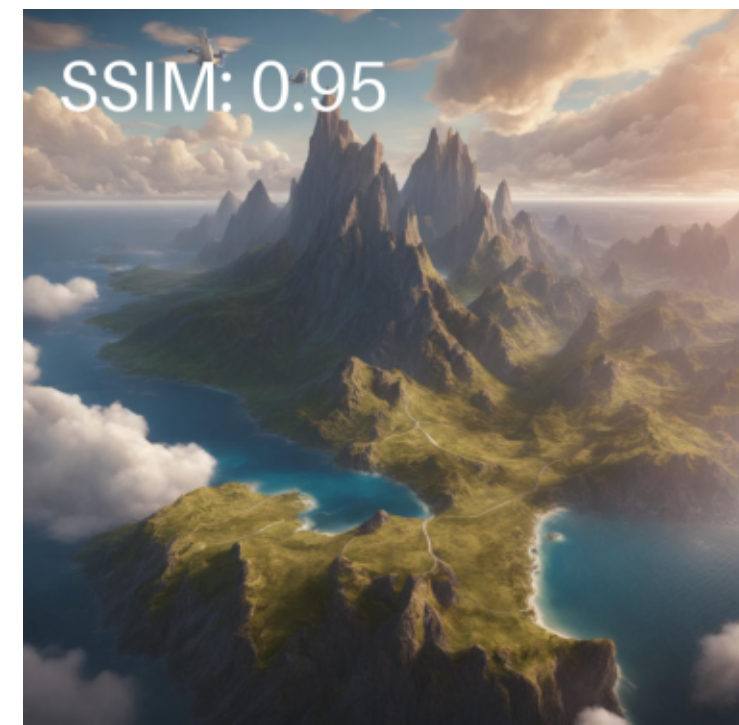



portrait of Emma Watson as Hermione Granger sitting next to a window reading a book, focused expression, face focus, golden hour, art by Kenne Gregoire and Krenz Cushart, trending on artstation

Step 40

FP32

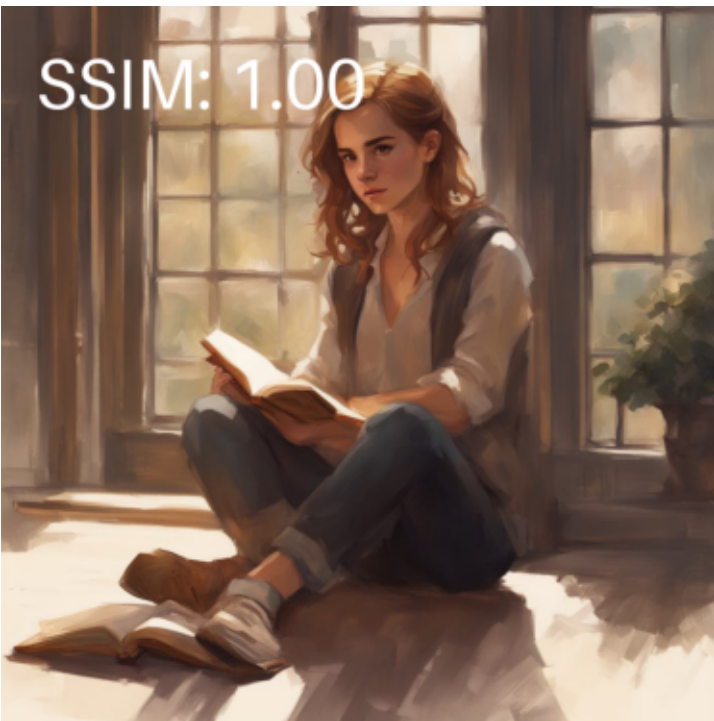

M4E3

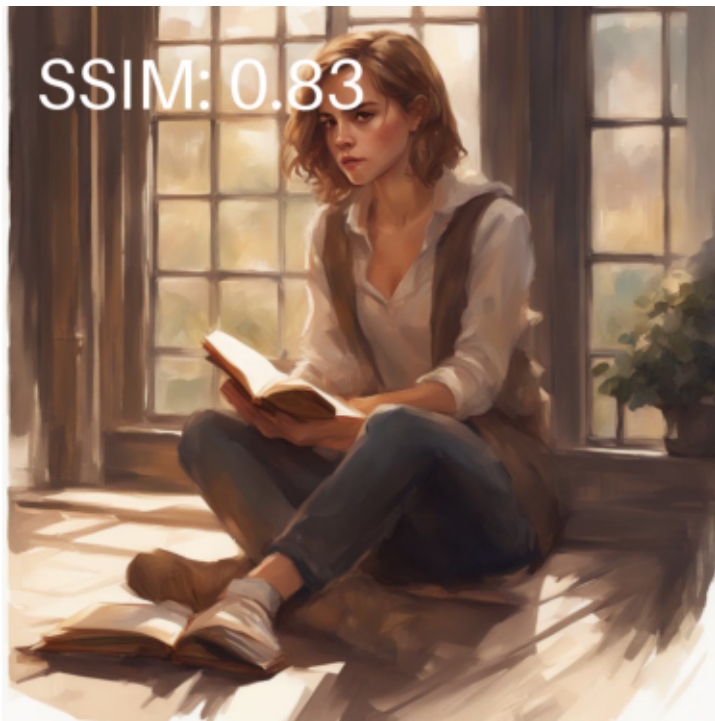

+SR

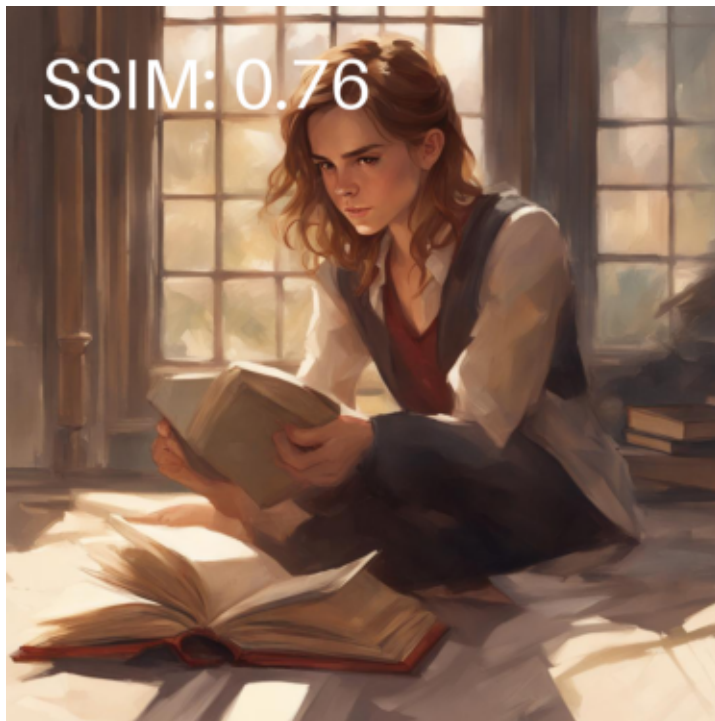

+WSR(p=4)

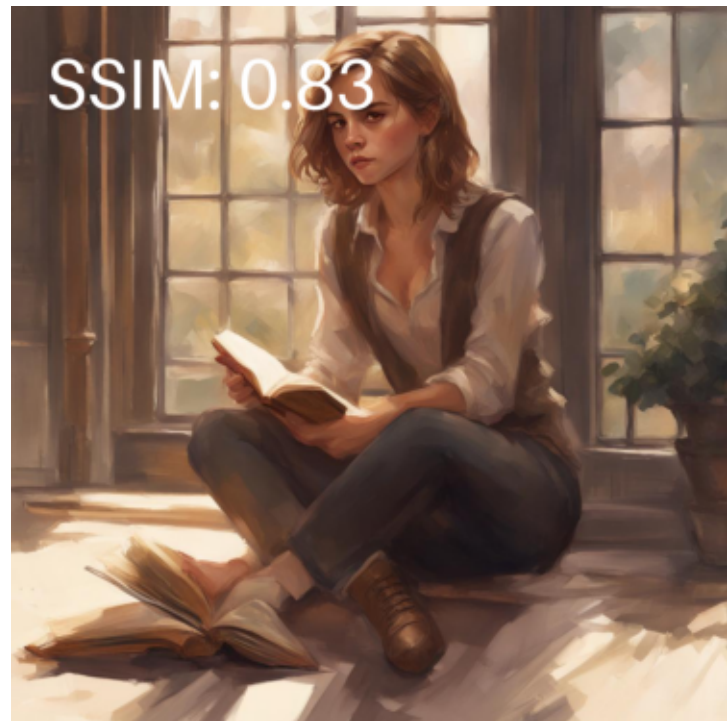

Step 100

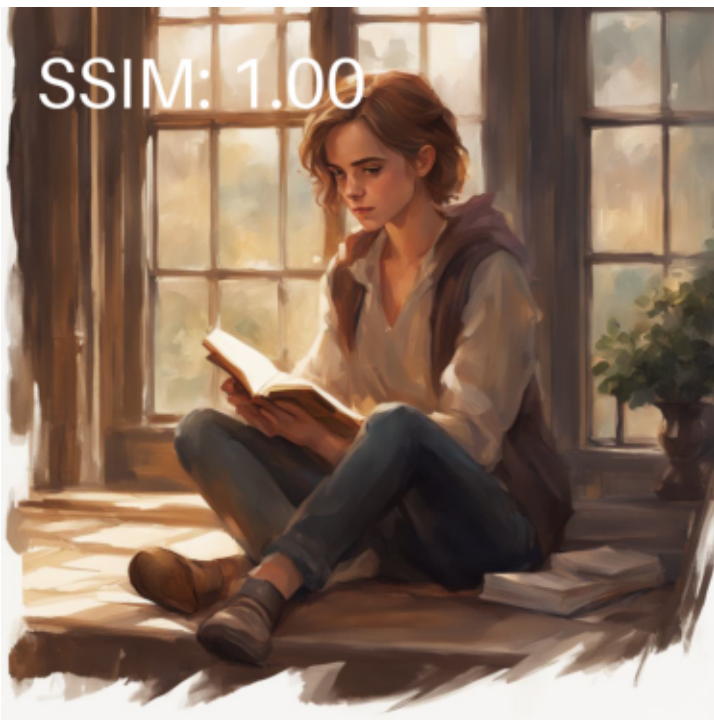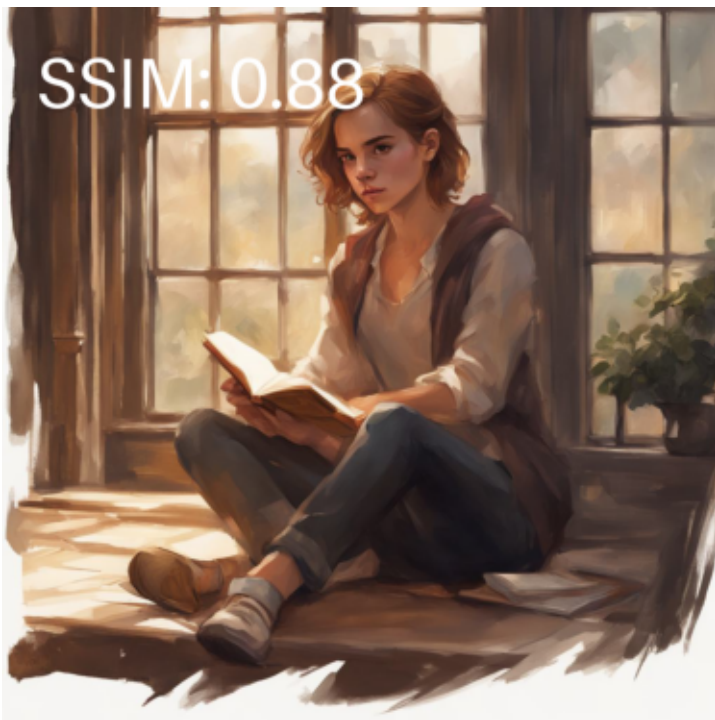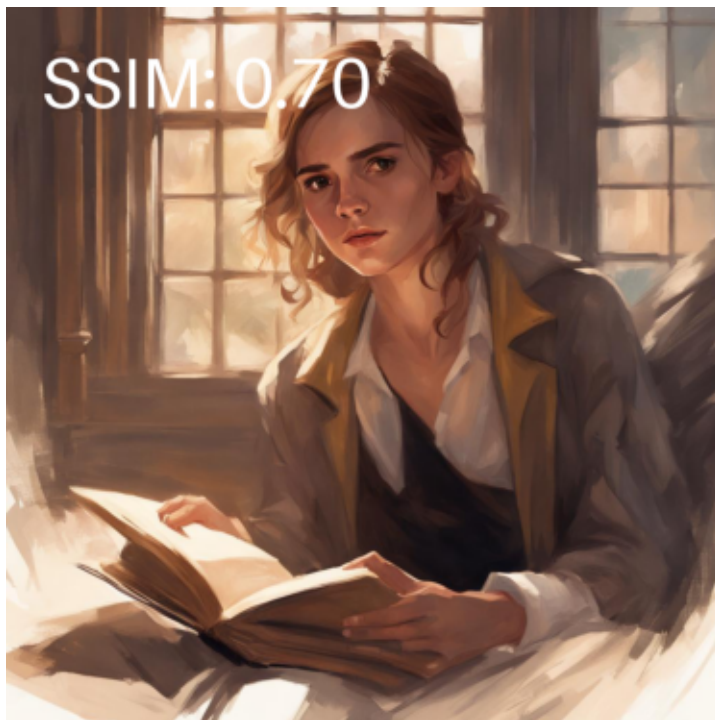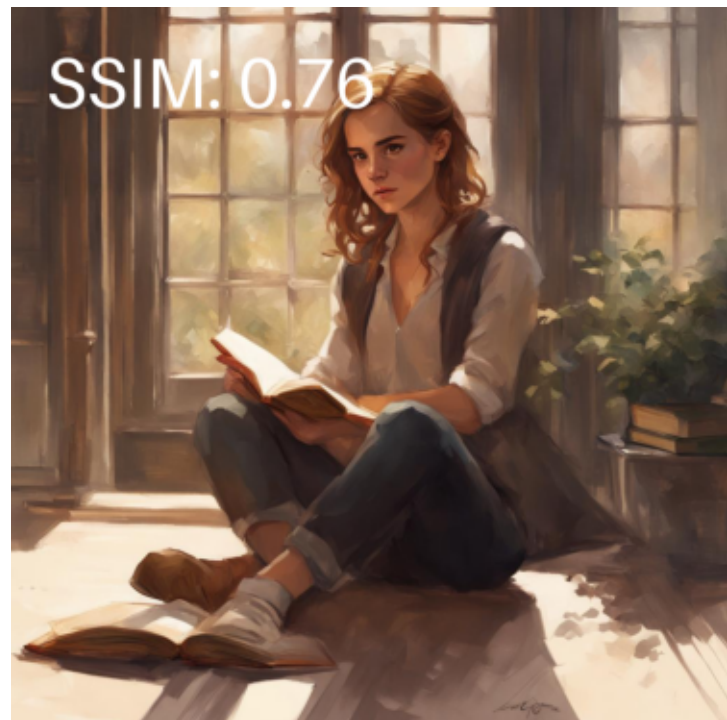

Step 200

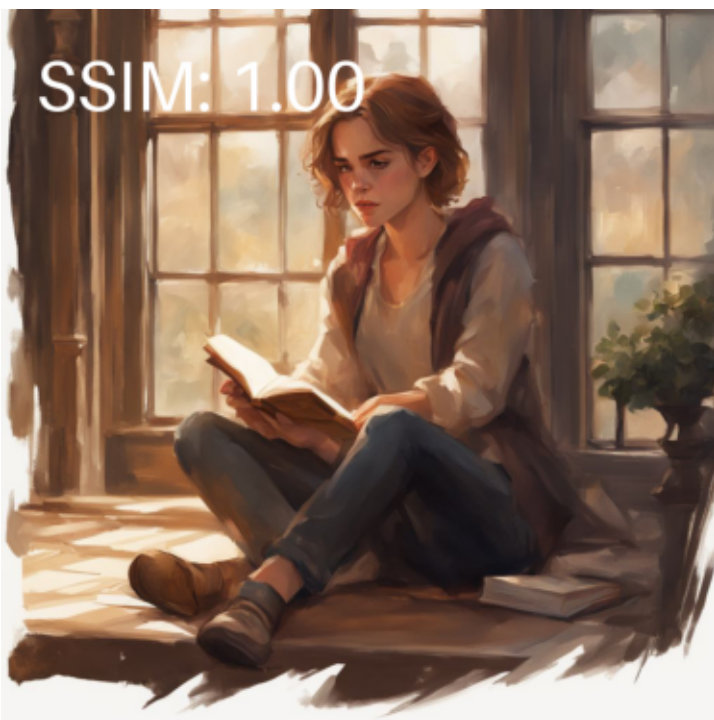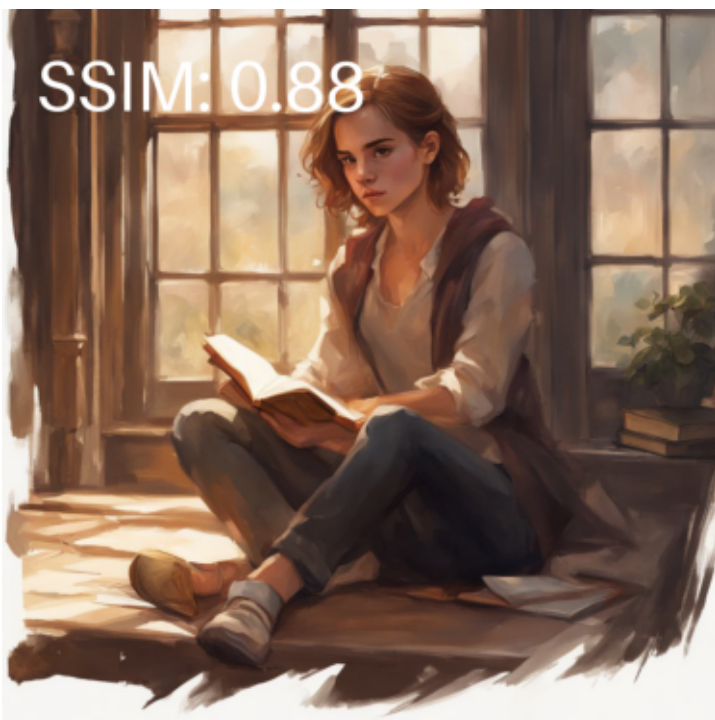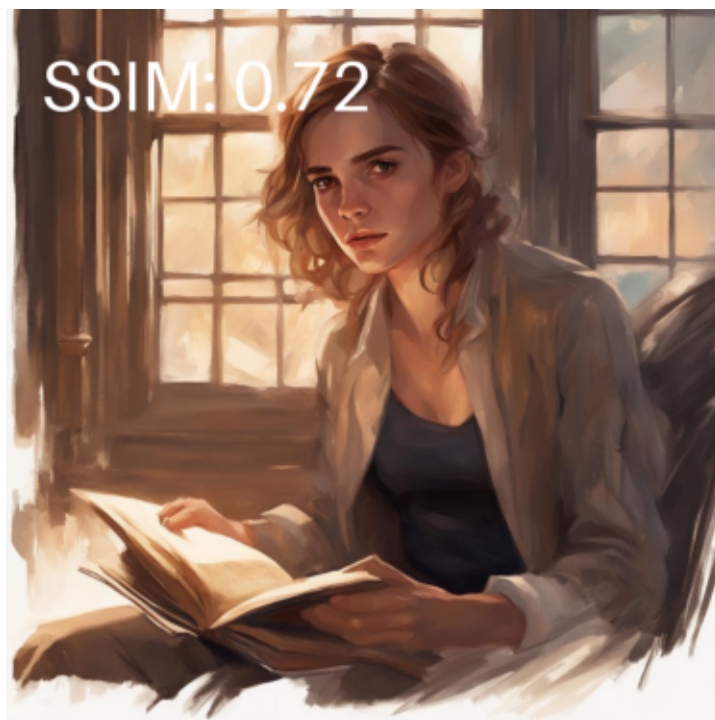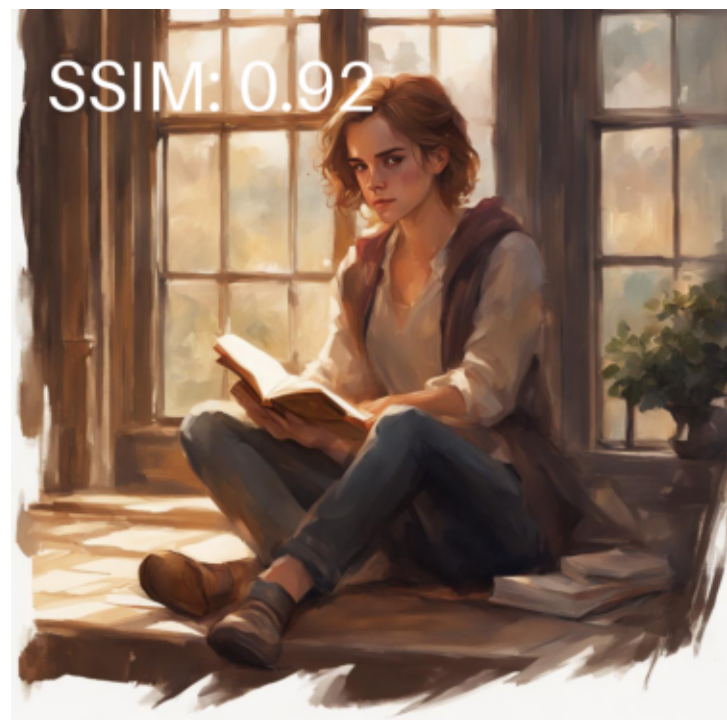



decorated modern country house interior, trending on artstation, hdr, 8 k, light reflections

Step 40

FP32

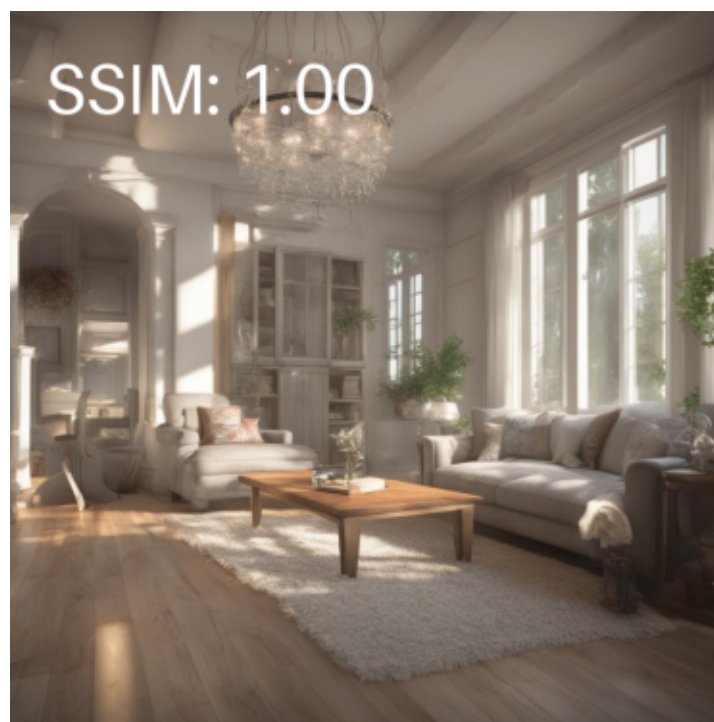

M4E3

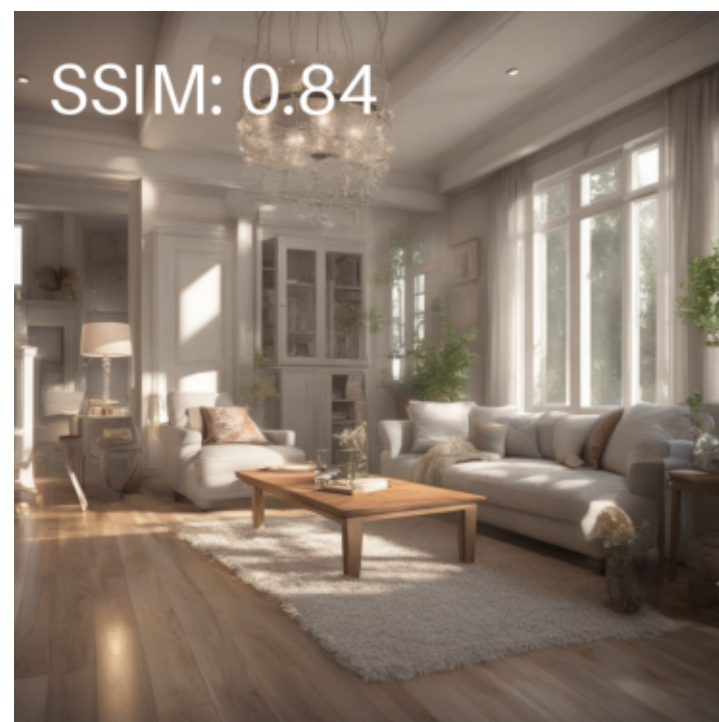

+SR

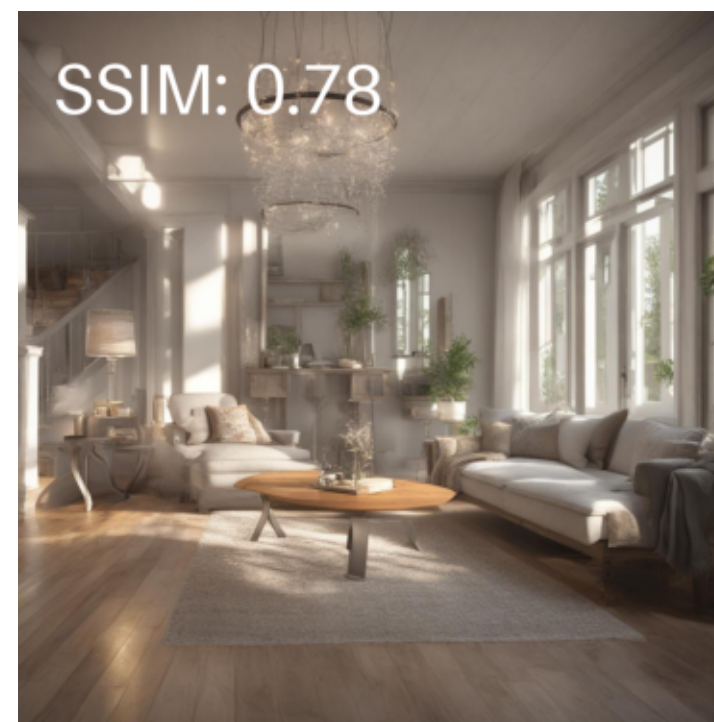

+WSR(p=4)

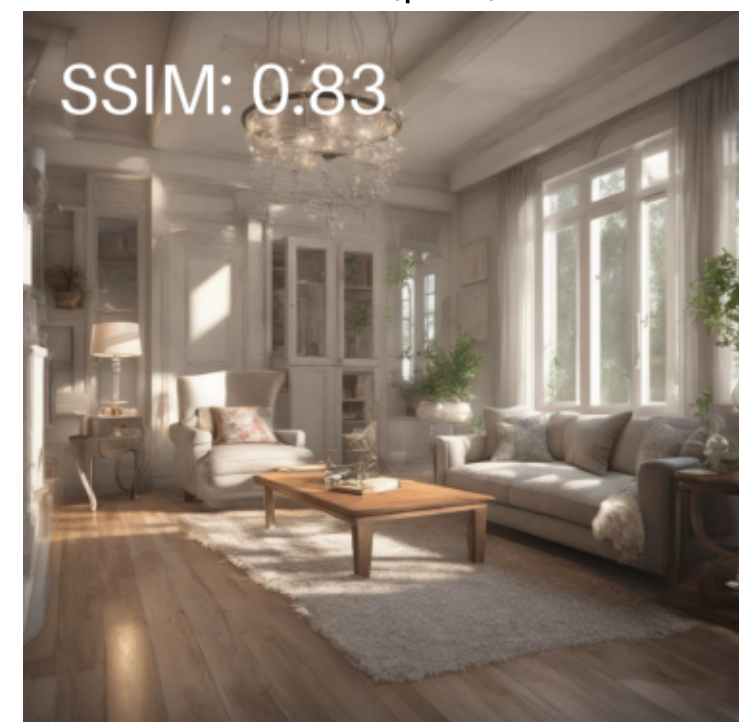

Step 100

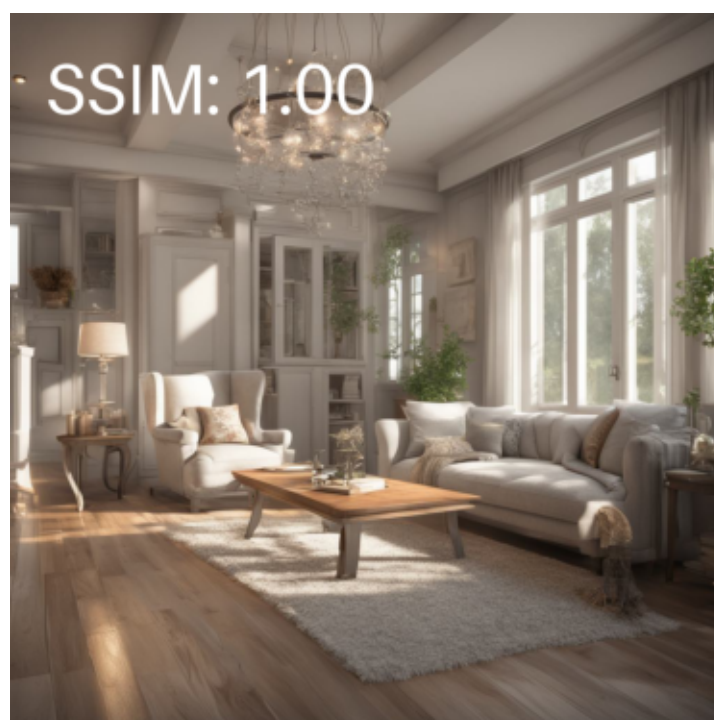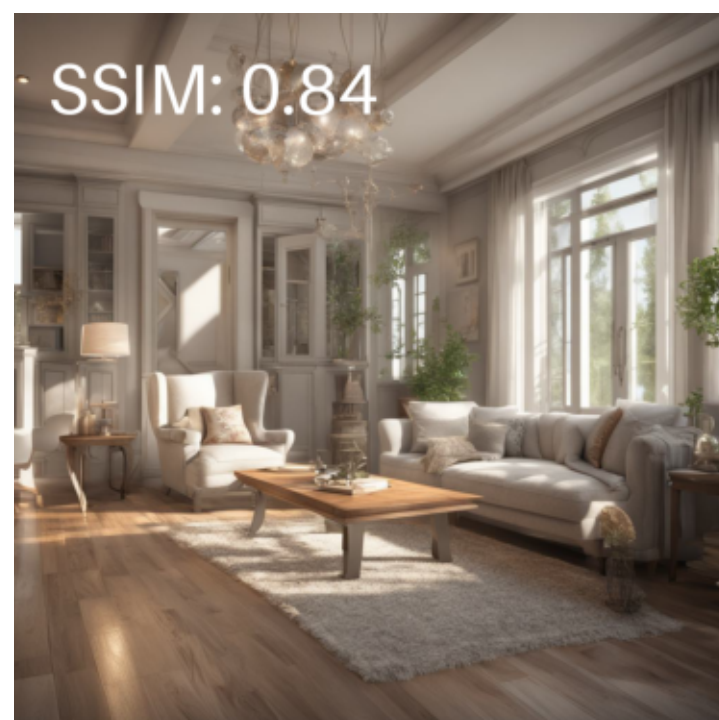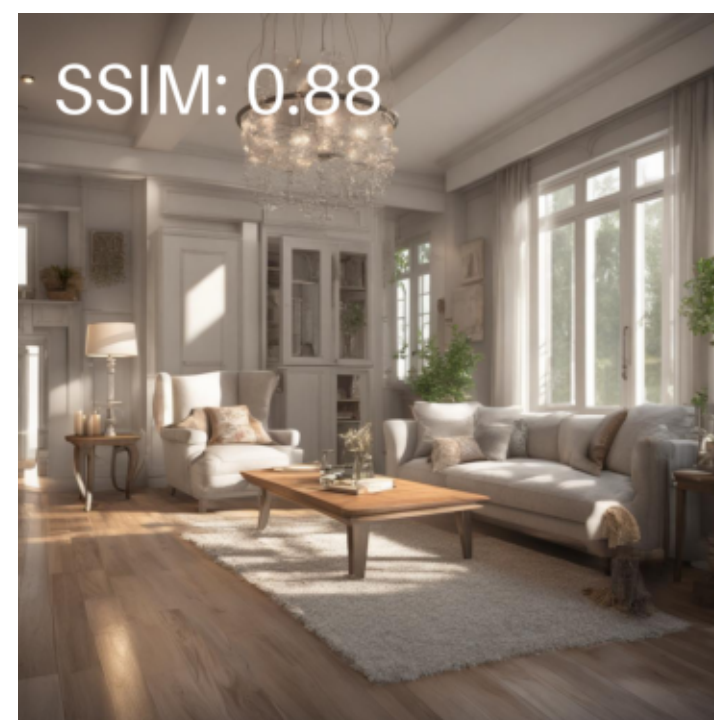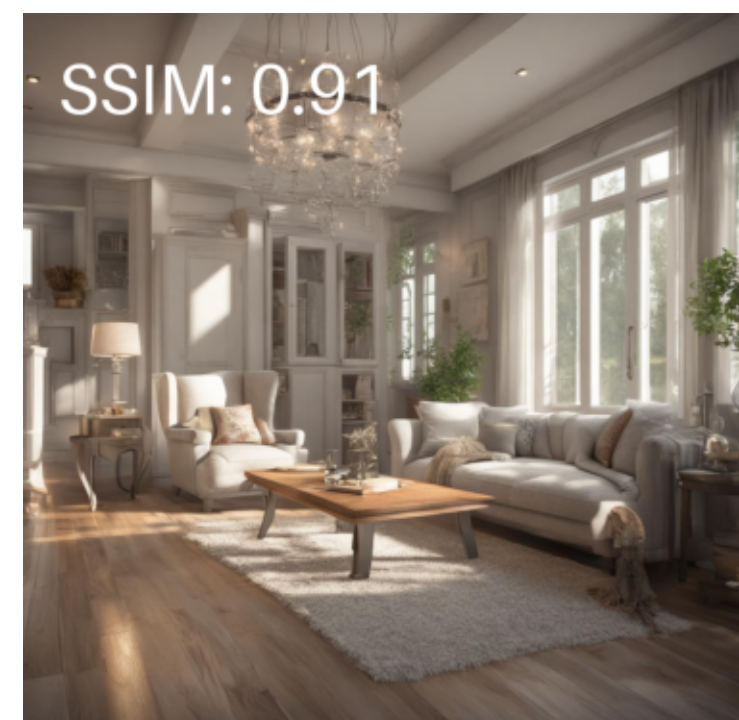

Step 200

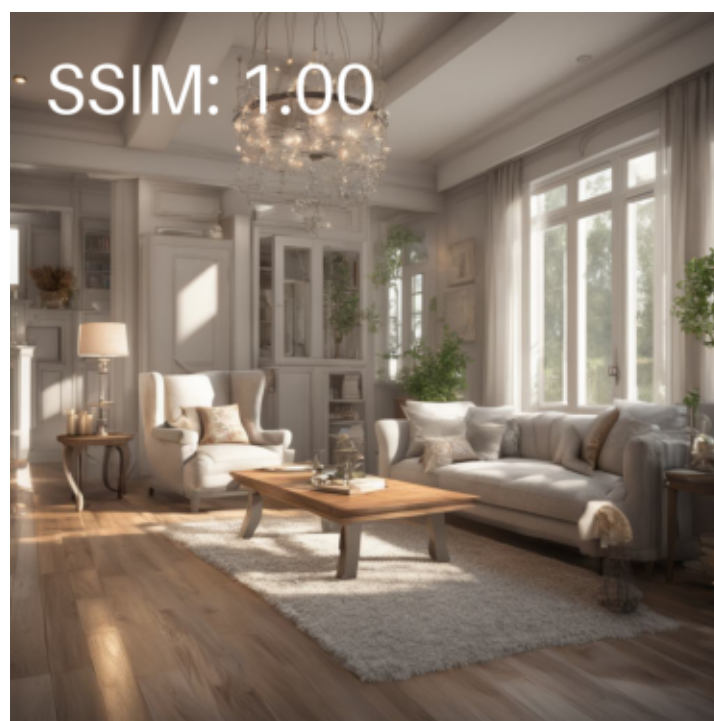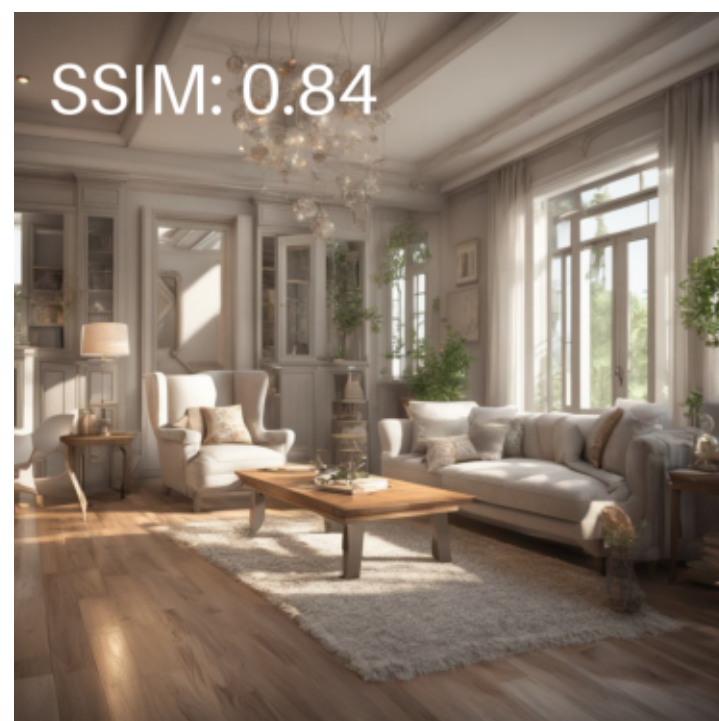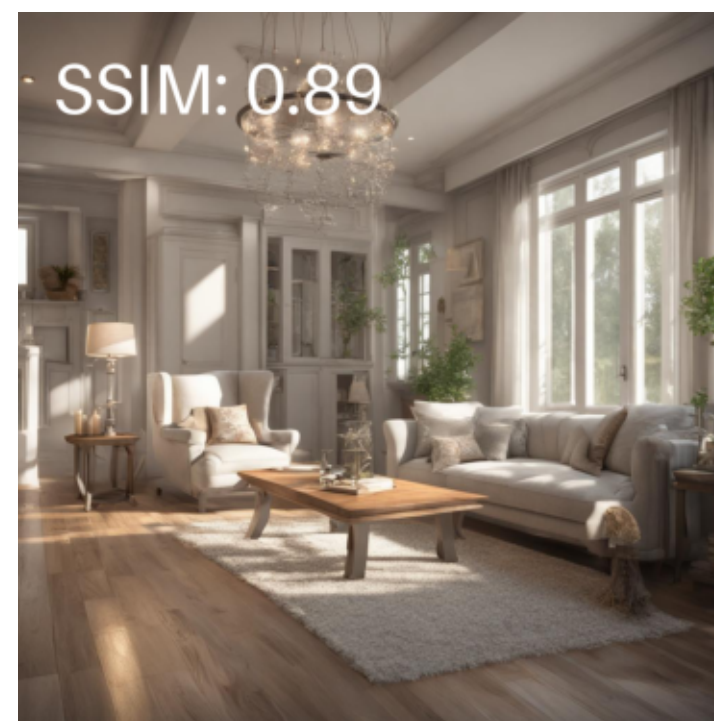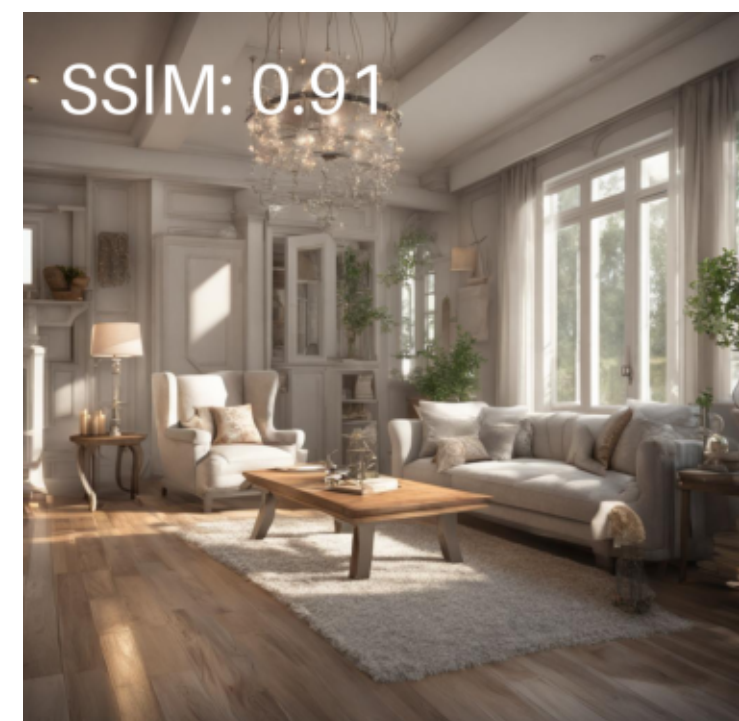



a highly detailed portrait of a man with dark green hair and green glowing eyes, high detail clothing, concept art, anime, artstation, professional

FP32

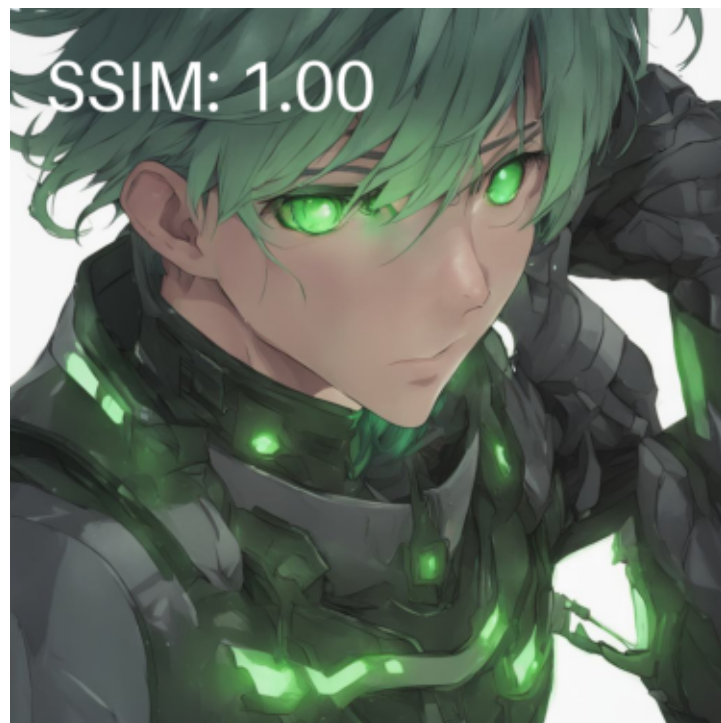

M4E3

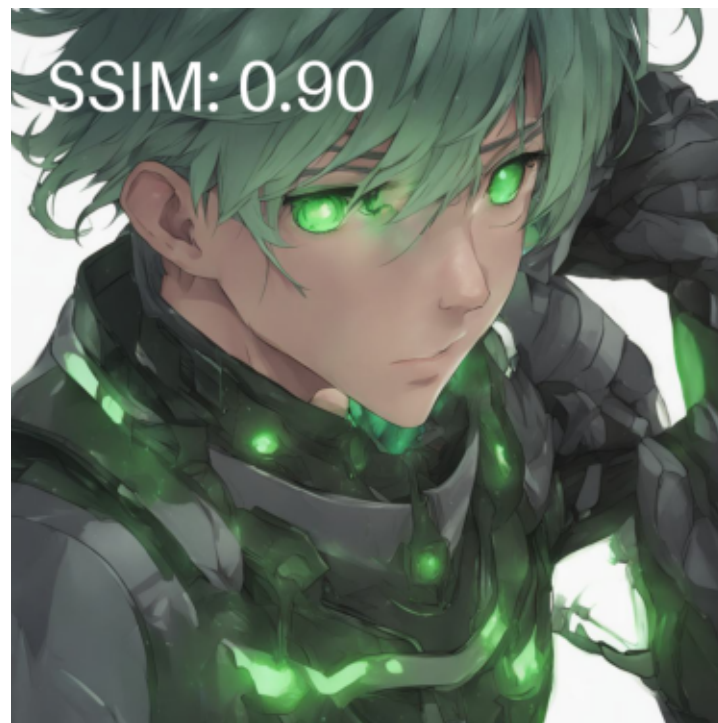

+SR

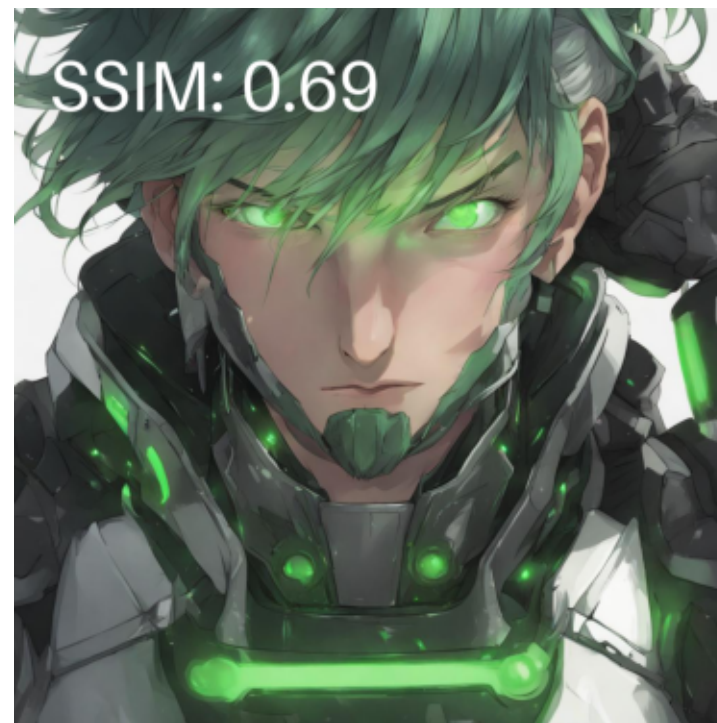

+WSR(p=4)

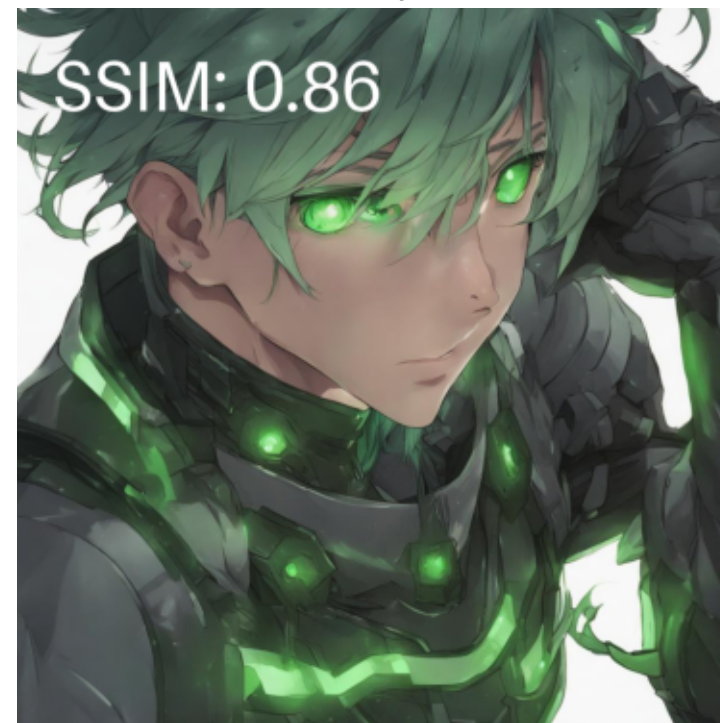

Step 40

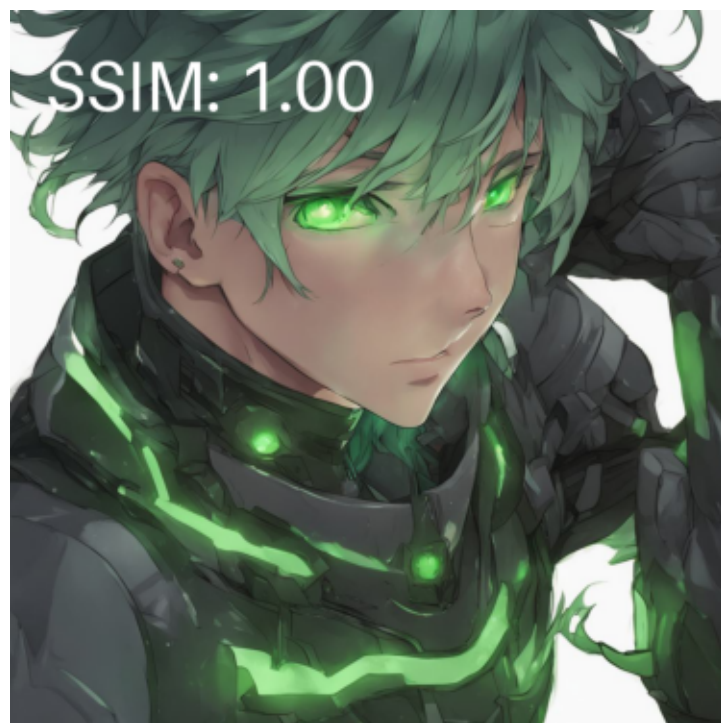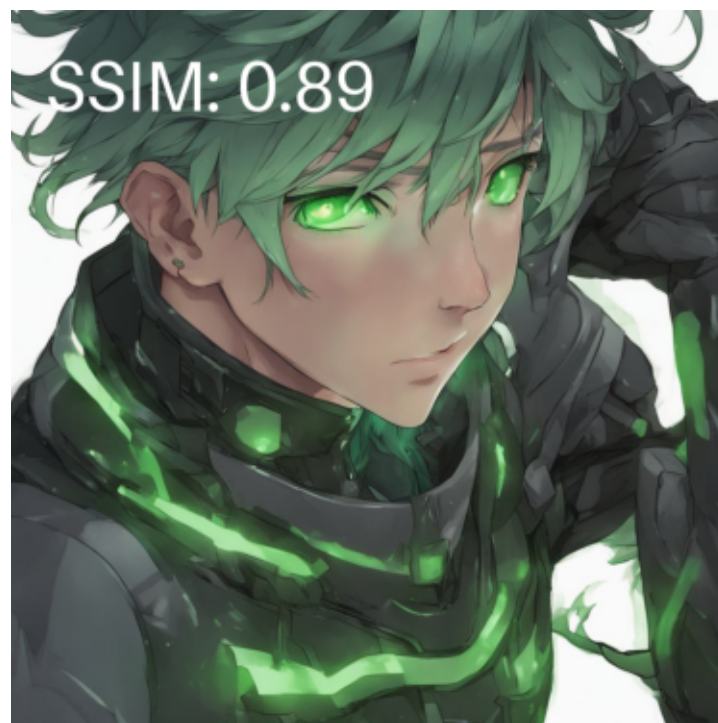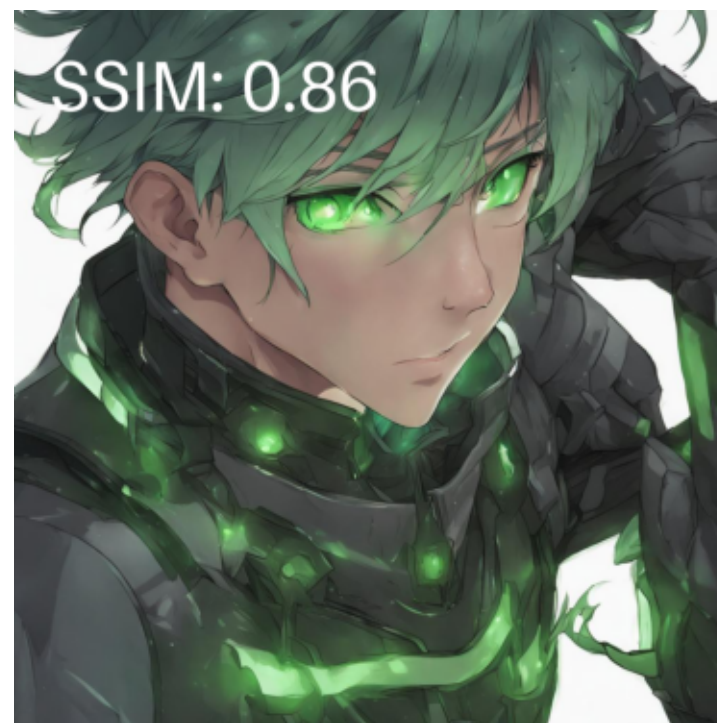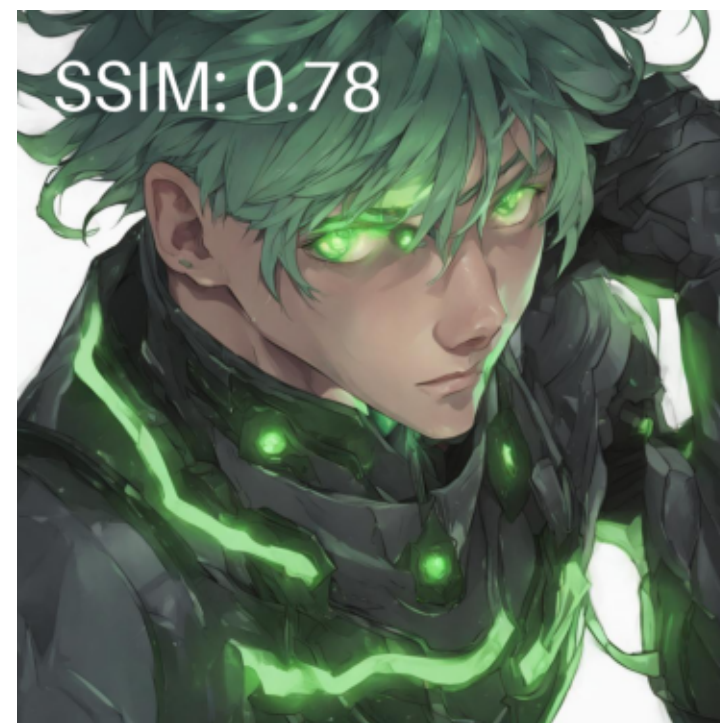

Step 100

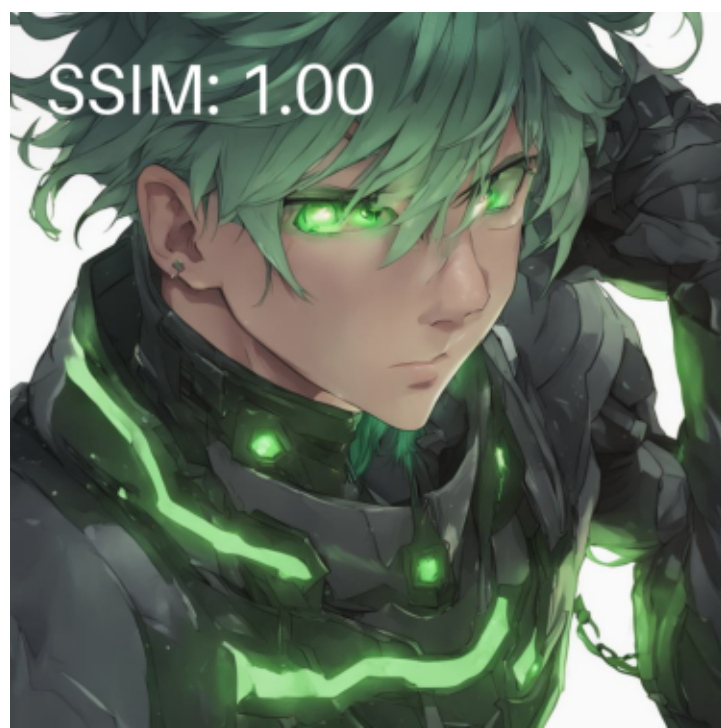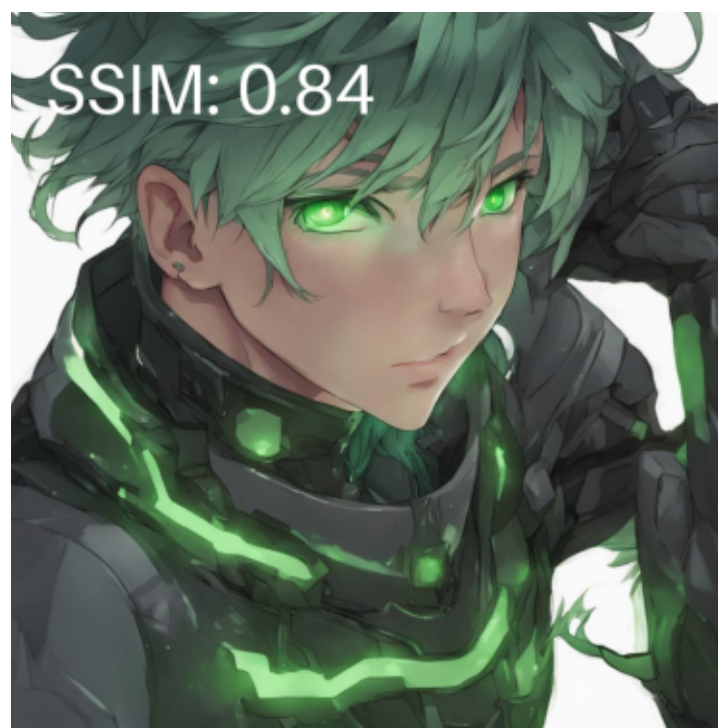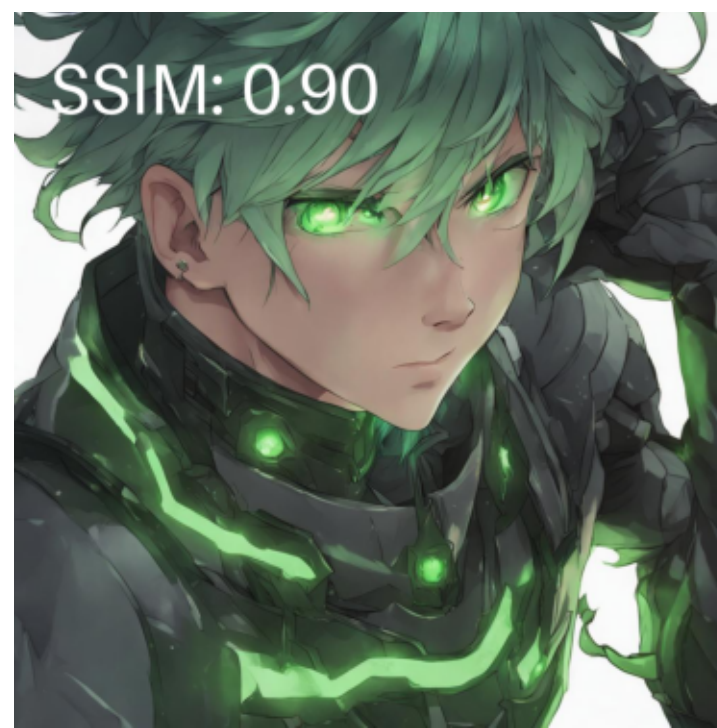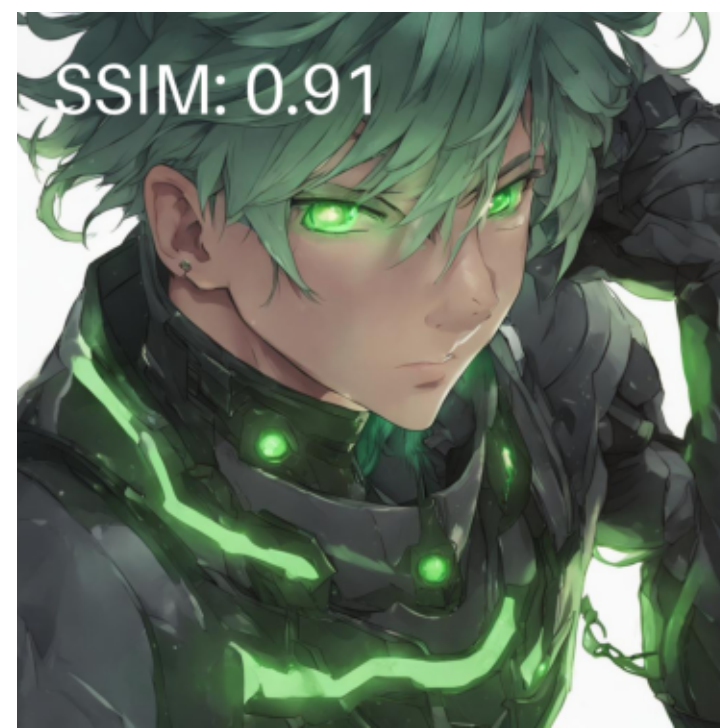

Step 200



rgb wires, a woman crawling on the ceiling, library, waterfall, cinematic, movie scene, inspired by  
zdzislaw beksinski, veins,, cables everywhere, bedroom, ultra realistic, concept art, intricate  
details, highly detailed, photorealistic, octane render, 8 k

FP32

M4E3

+SR

+WSR(p=4)

Step 40

SSIM: 1.00

SSIM: 0.84

SSIM: 0.86

SSIM: 0.89

Step 100

SSIM: 1.00

SSIM: 0.76

SSIM: 0.79

SSIM: 0.80

Step 200

SSIM: 1.00

SSIM: 0.70

SSIM: 0.74

SSIM: 0.90



realistic painting of a tardigrade kaiju, with 6 legs in a desert storm, by james gurney, slime, big globule eye, godzilla, vintage, concept art, oil painting, tonalism, crispy

FP32

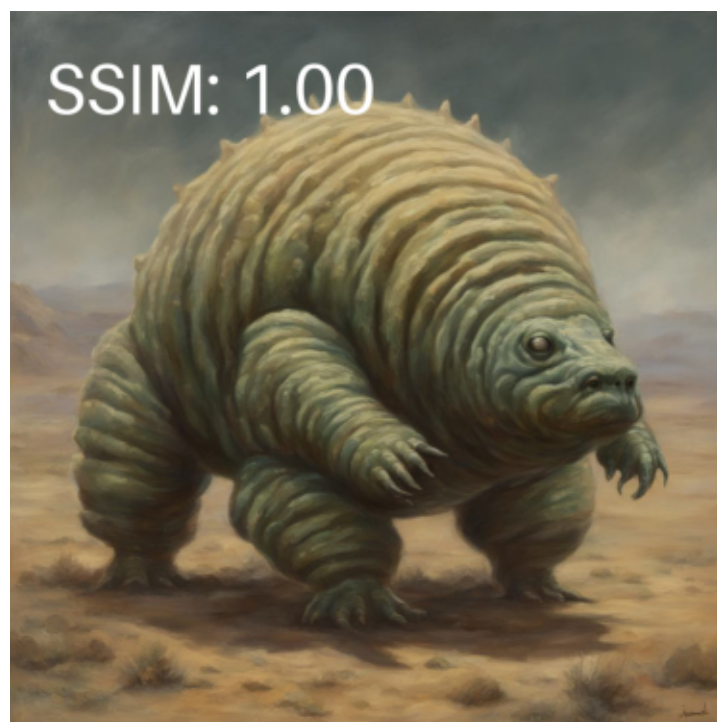

M4E3

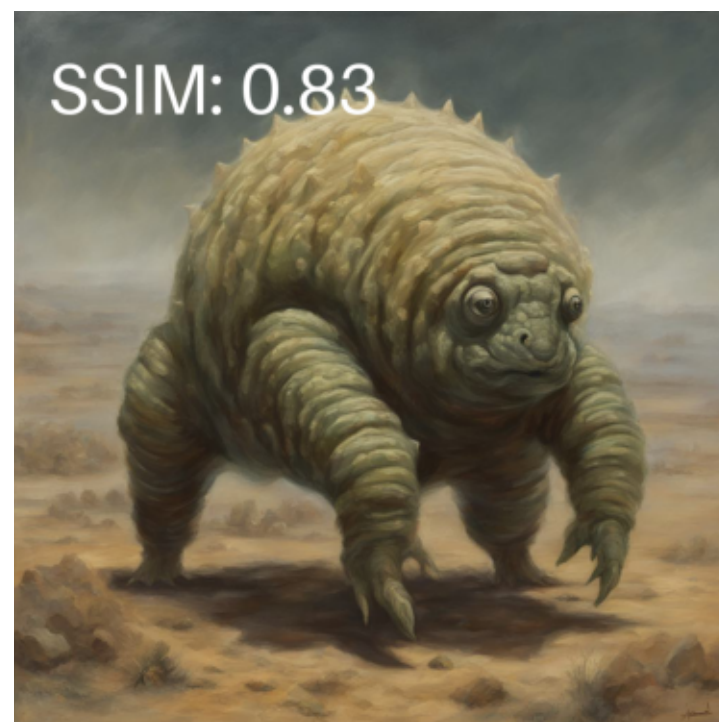

+SR

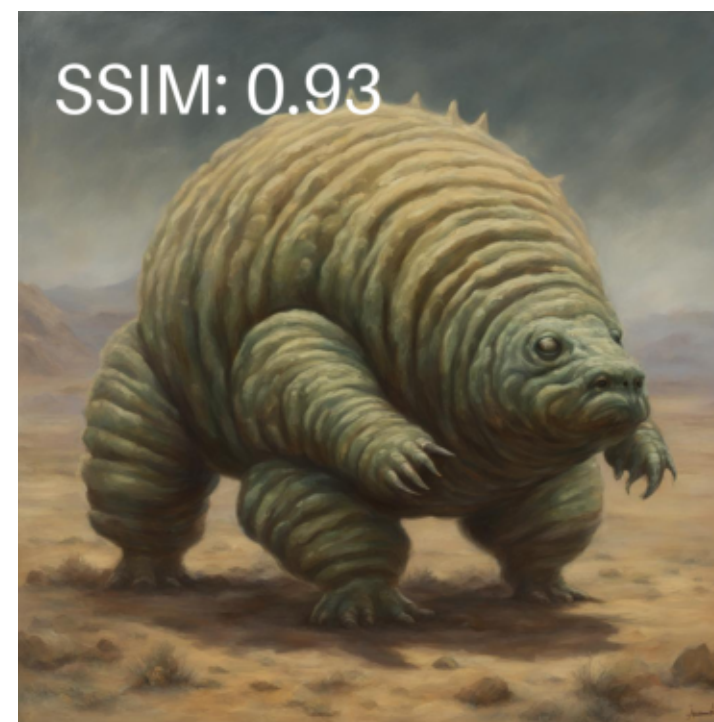

+WSR(p=4)

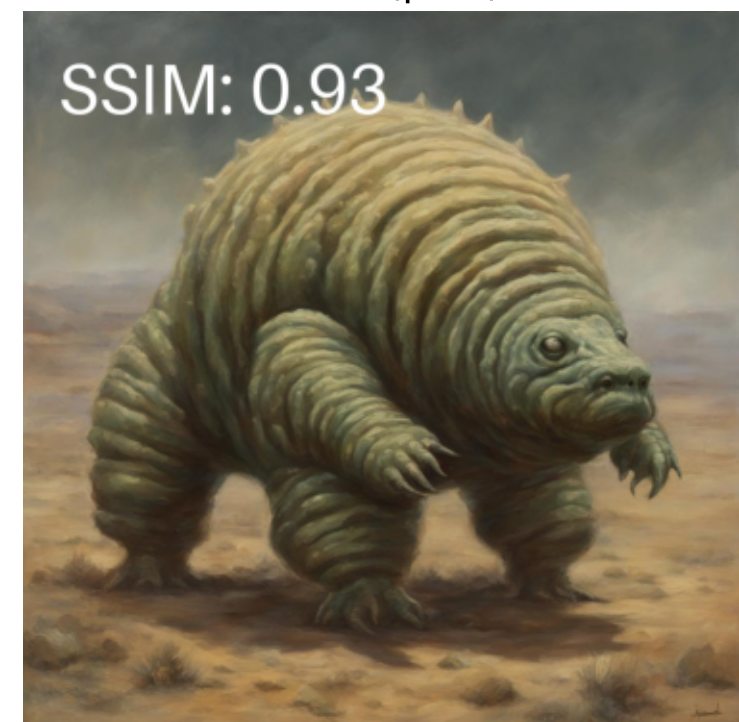

SSIM: 1.00

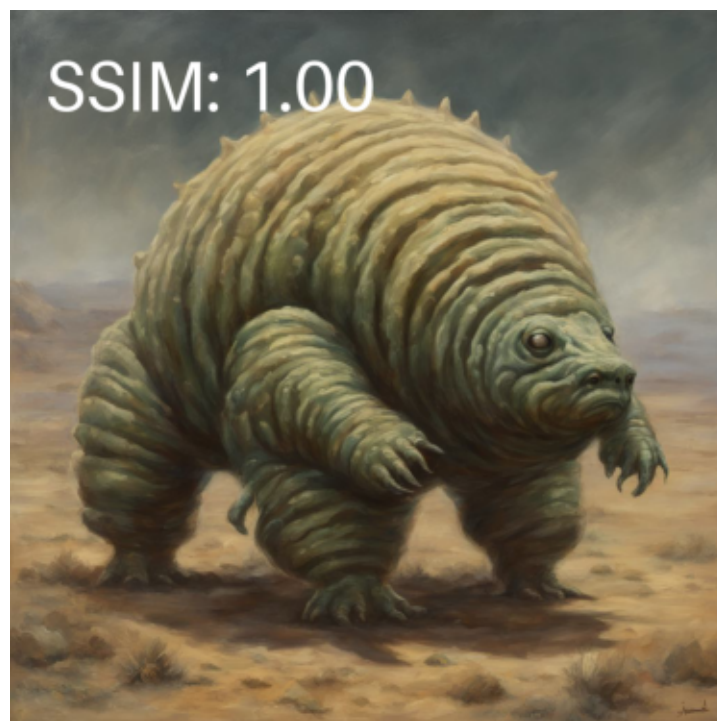

SSIM: 0.80

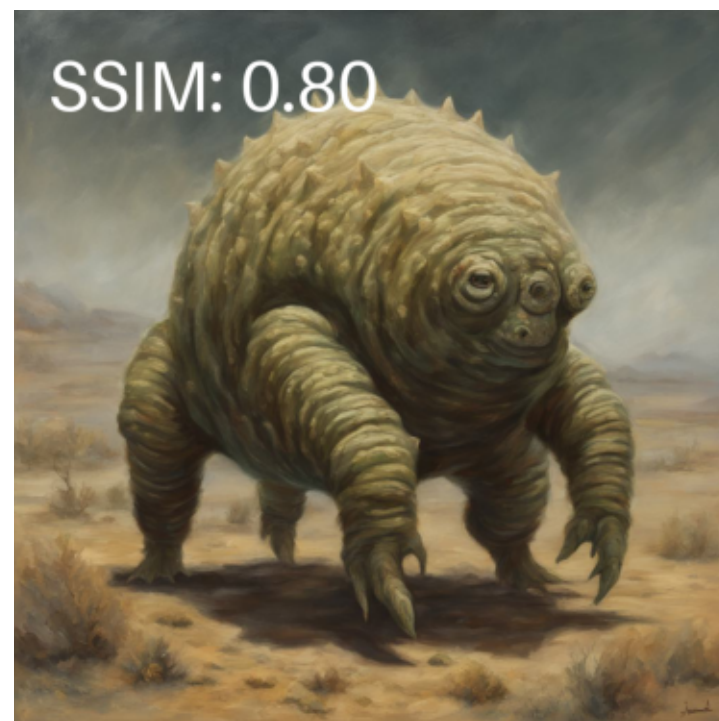

SSIM: 0.94

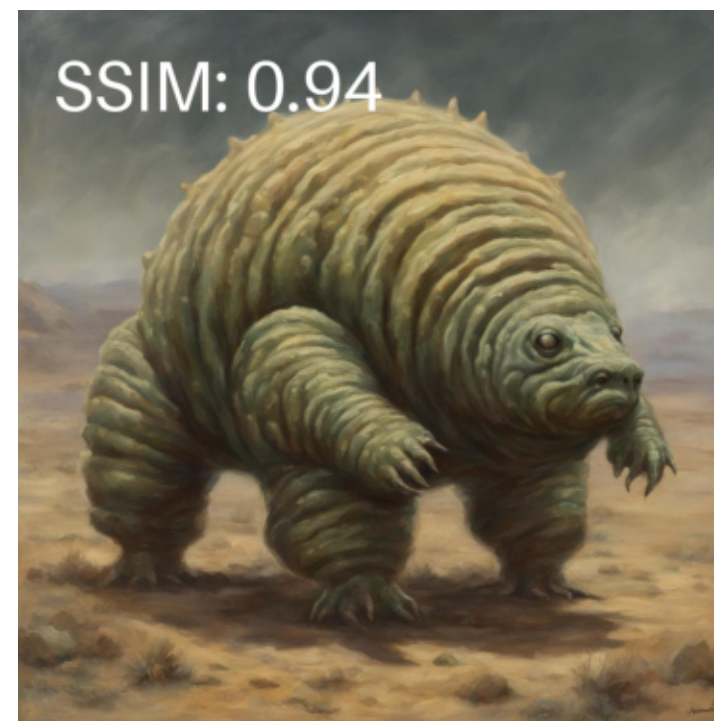

SSIM: 0.94

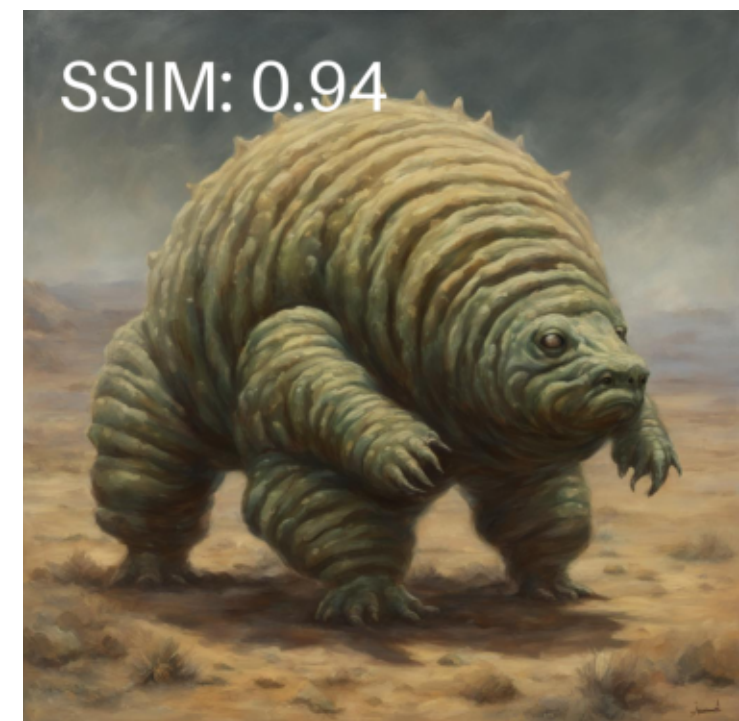

SSIM: 1.00

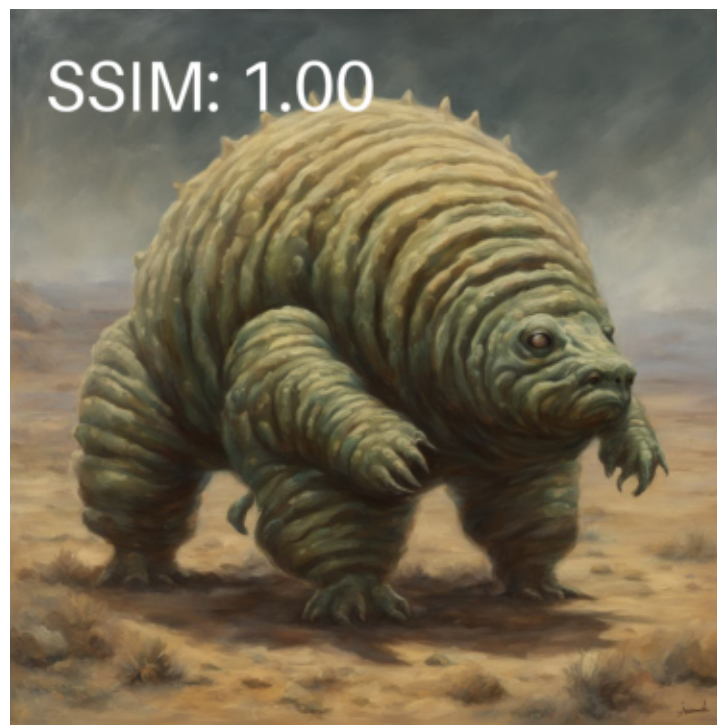

SSIM: 0.80

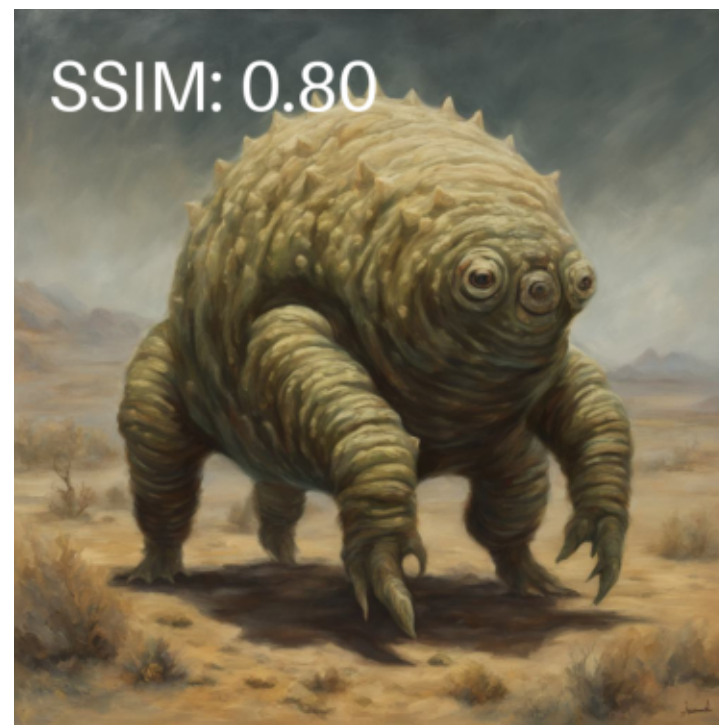

SSIM: 0.87

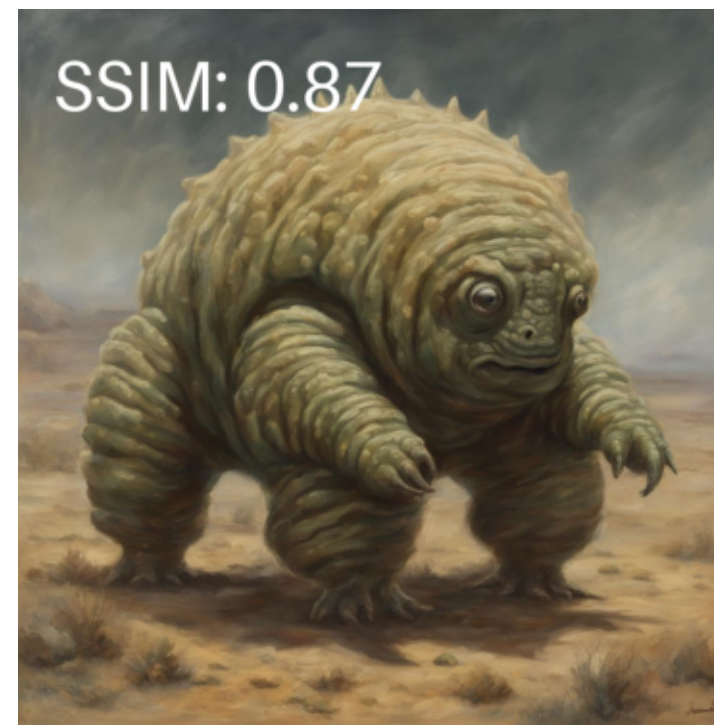

SSIM: 0.86

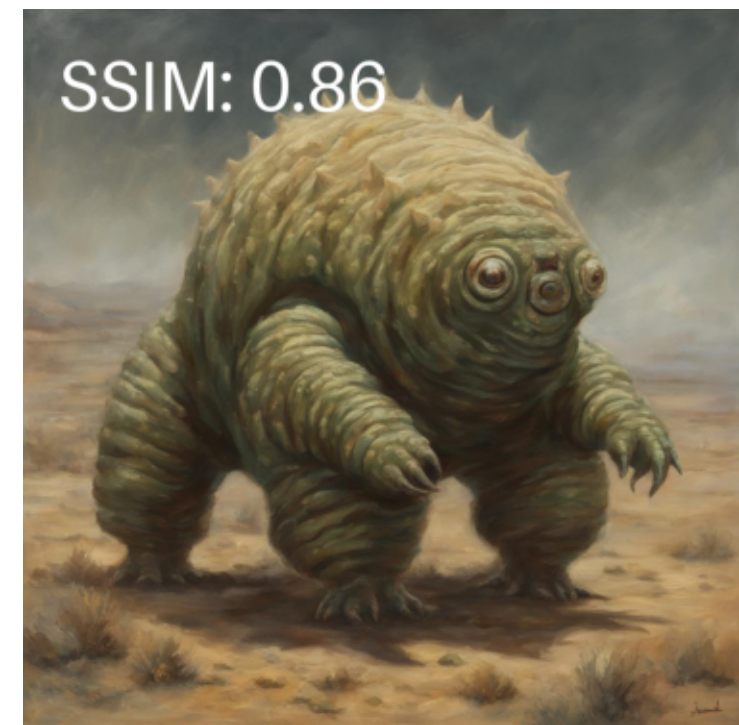

Step 40

Step 100

Step 200



concept art of a minimalistic modern logo for a european logistics corporation

Step 40

FP32

M4E3

+SR

+WSR(p=4)

SSIM: 1.00

SSIM: 0.97

SSIM: 0.95

SSIM: 0.97

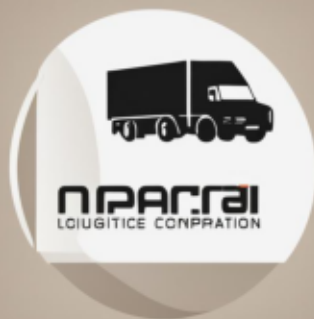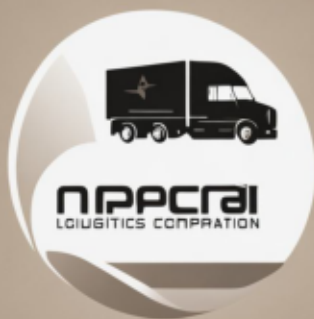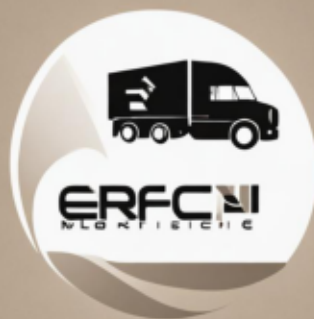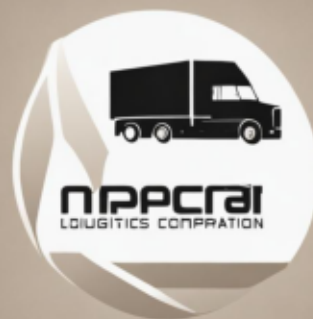

Step 100

SSIM: 1.00

SSIM: 0.95

SSIM: 0.94

SSIM: 0.93

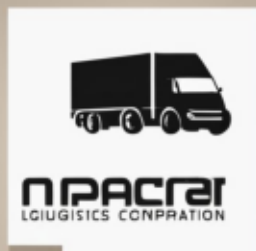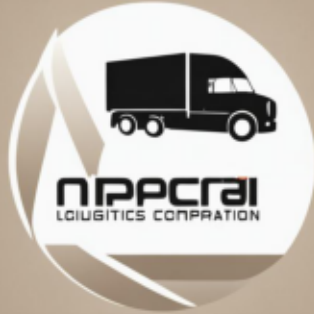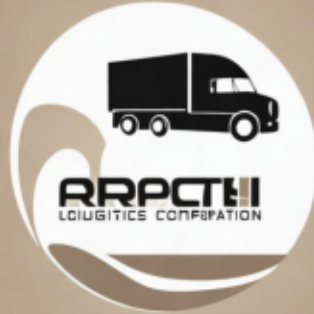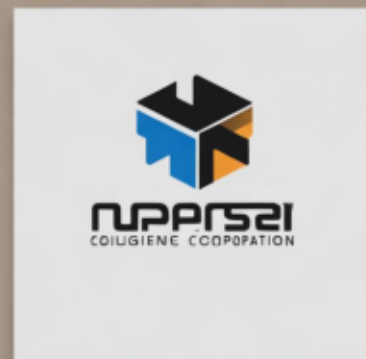

Step 200

SSIM: 1.00

SSIM: 0.97

SSIM: 0.94

SSIM: 0.99

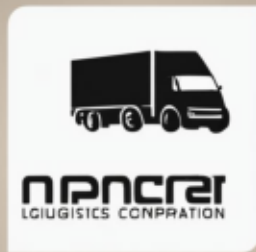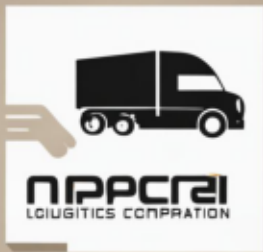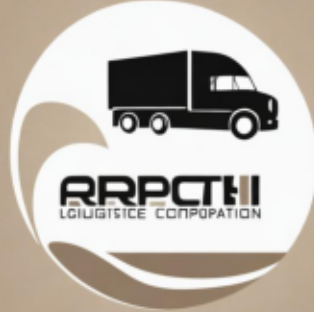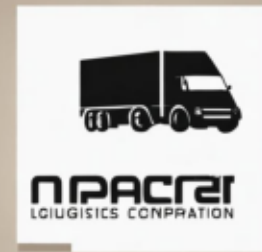



cybernetically enhanced cyborg hyena, realistic cyberpunk 2 0 7 7 concept art

Step 40

FP32

SSIM: 1.00

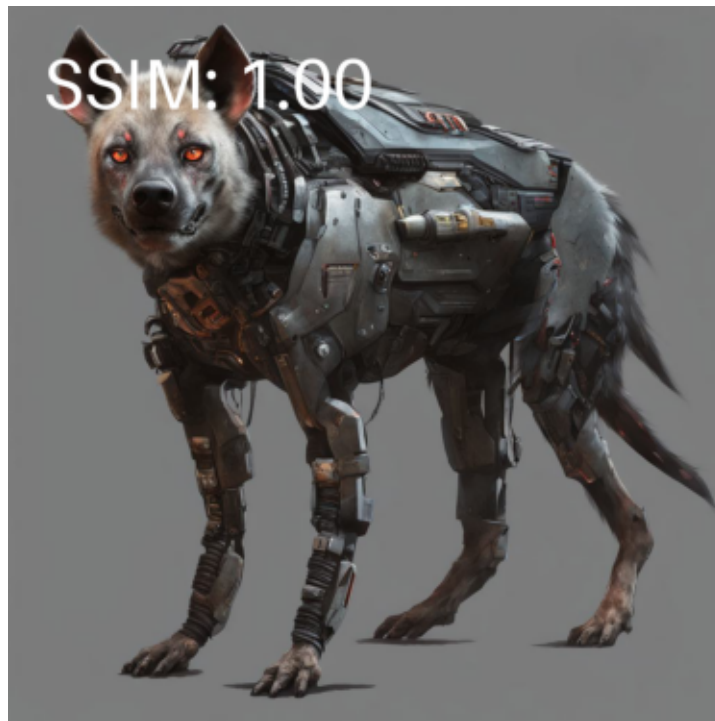

M4E3

SSIM: 0.82

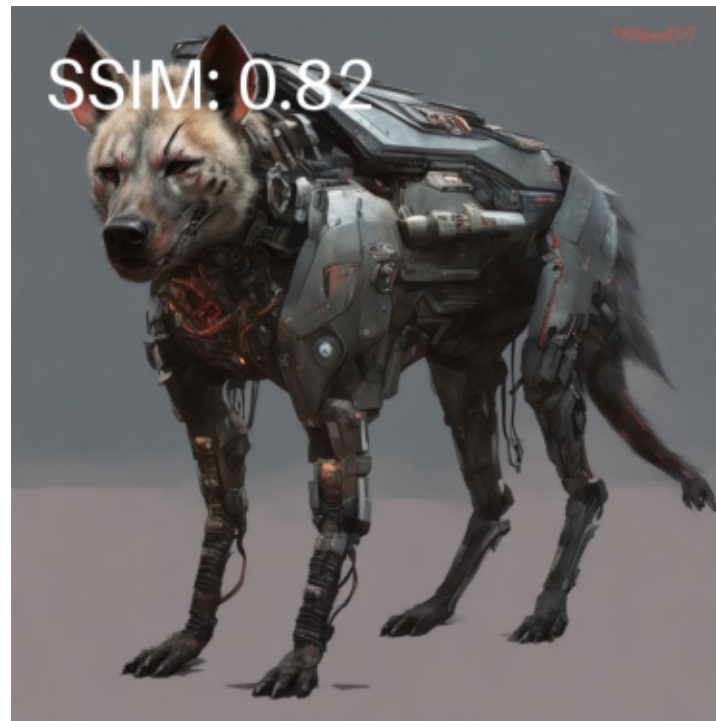

+SR

SSIM: 0.79

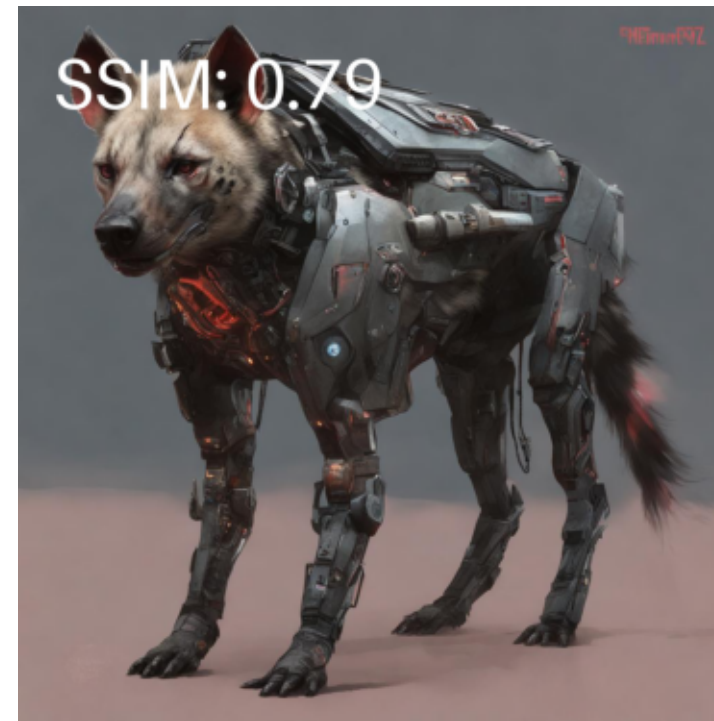

+WSR(p=4)

SSIM: 0.86

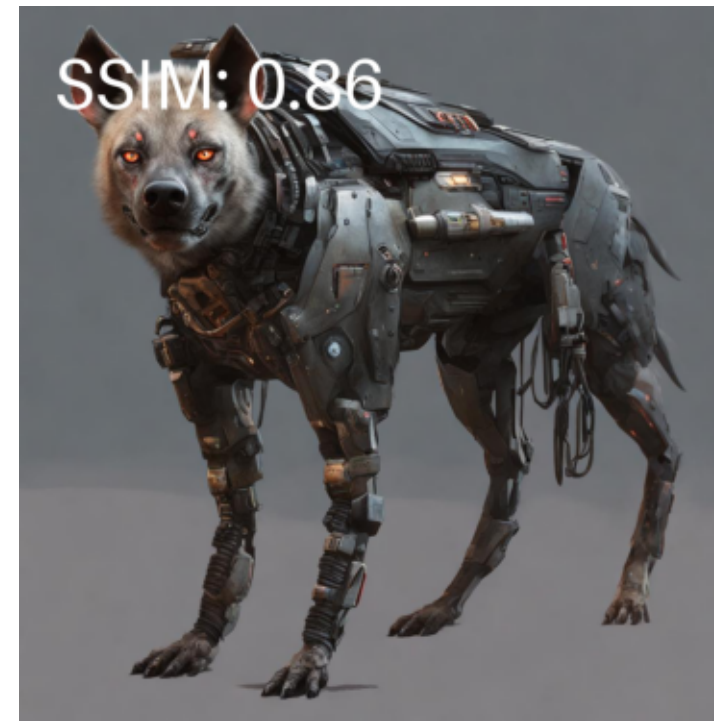

Step 100

SSIM: 1.00

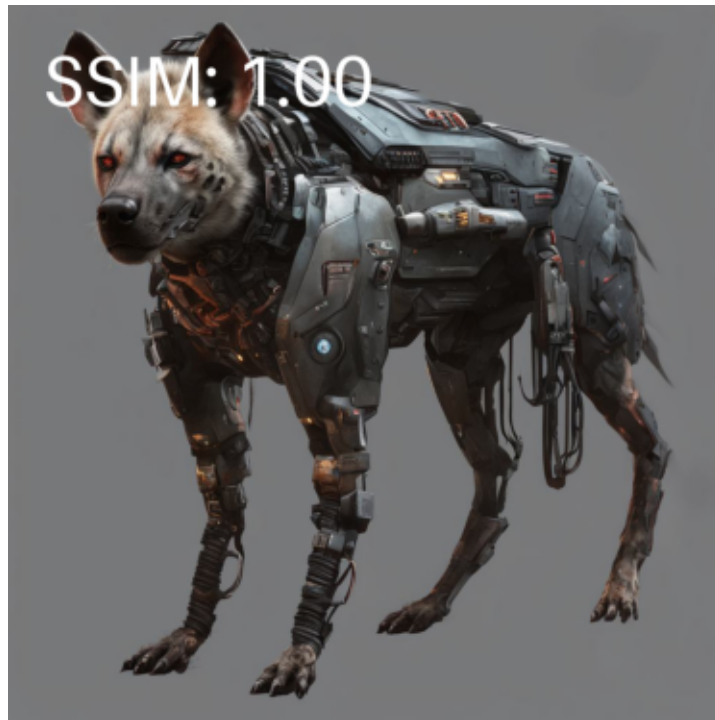

SSIM: 0.81

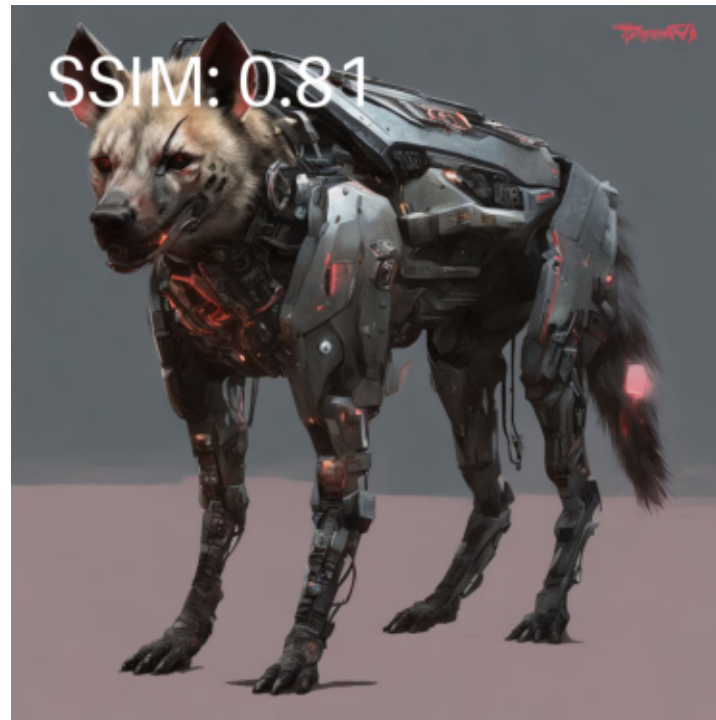

SSIM: 0.84

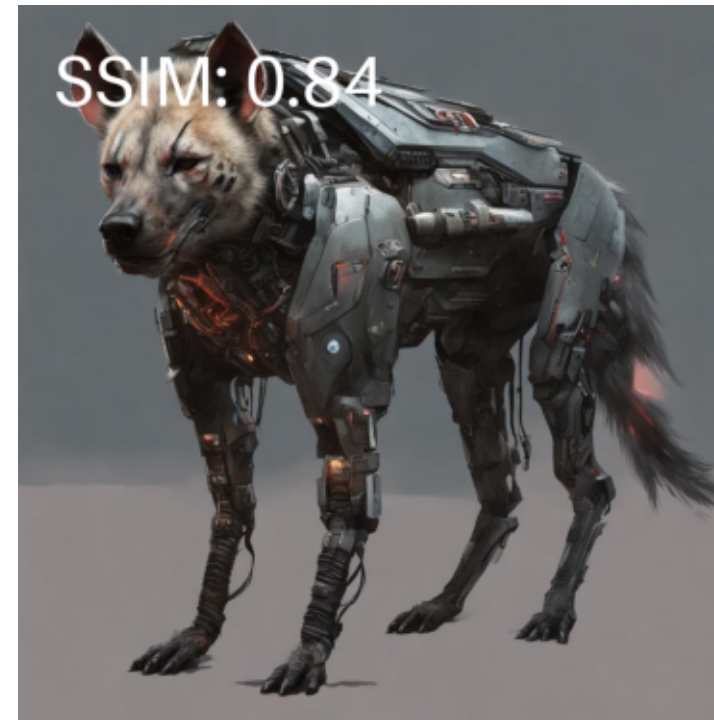

SSIM: 0.90

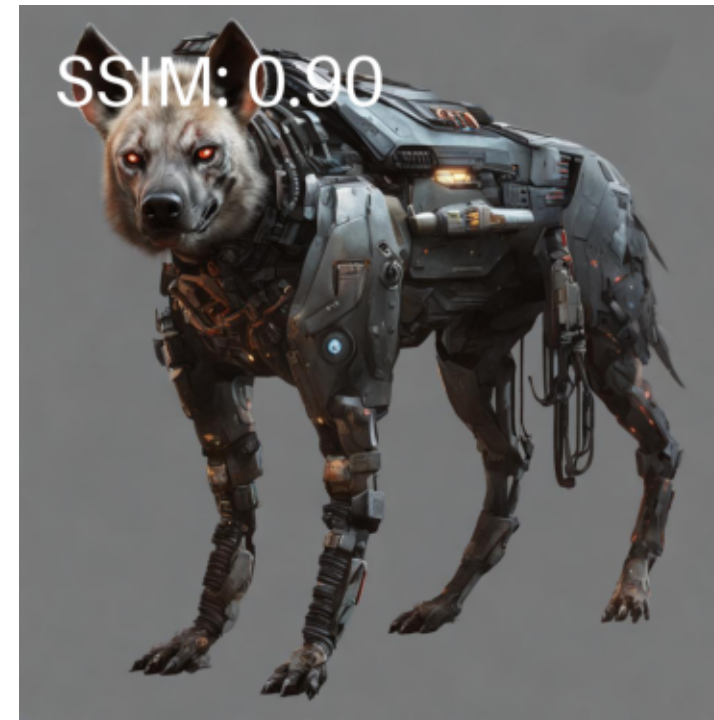

Step 200

SSIM: 1.00

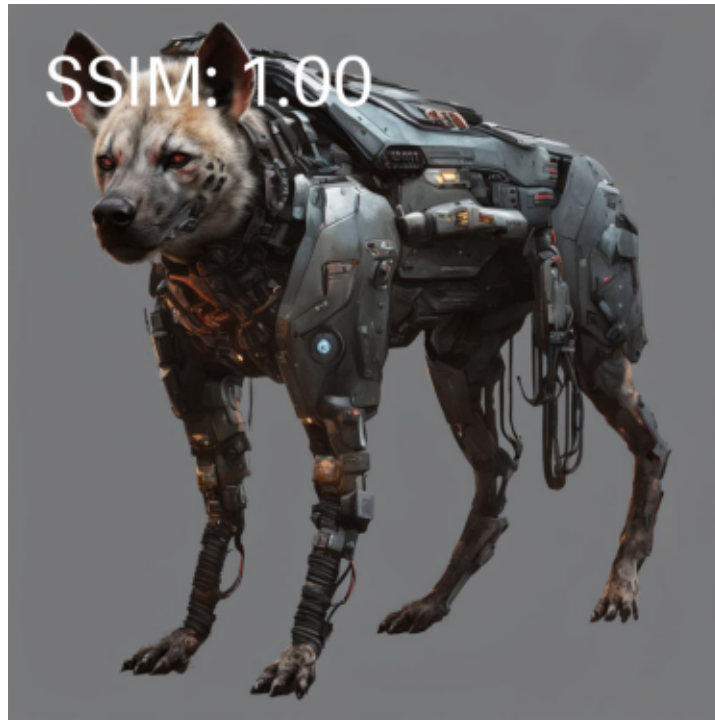

SSIM: 0.75

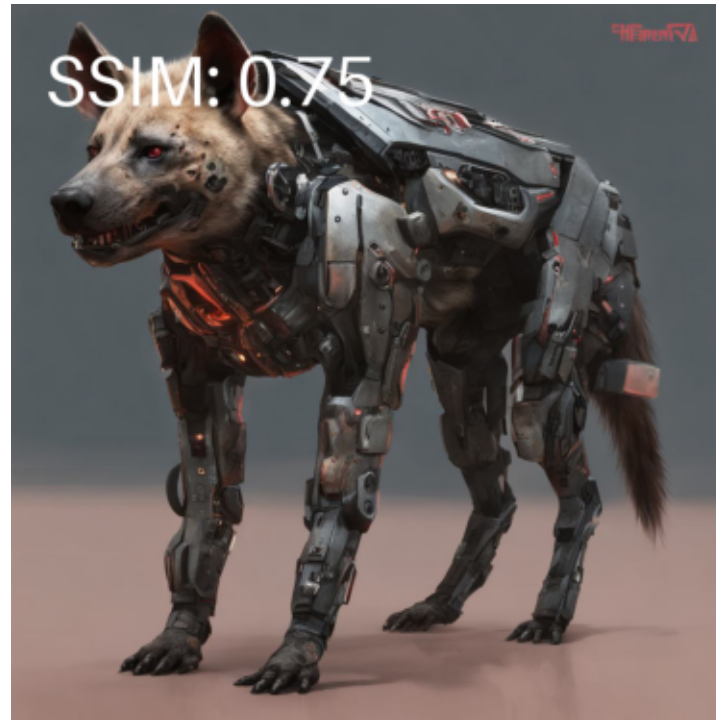

SSIM: 0.76

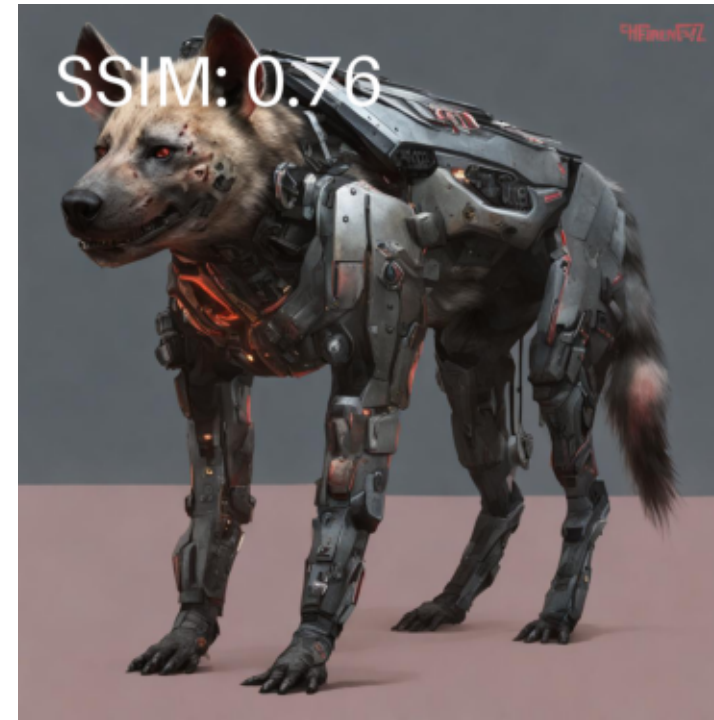

SSIM: 0.94

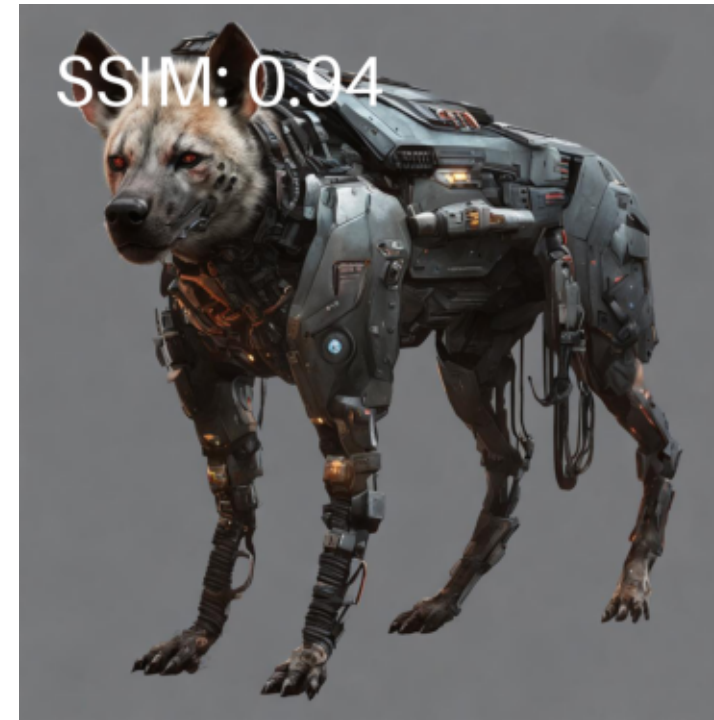



pastel landscape of an anime field. clean sharp digital art, environment concept art, by rossdraws,  
ghibli, breath of the wild, greg rutkowski

FP32

M4E3

+SR

+WSR(p=4)

Step 40

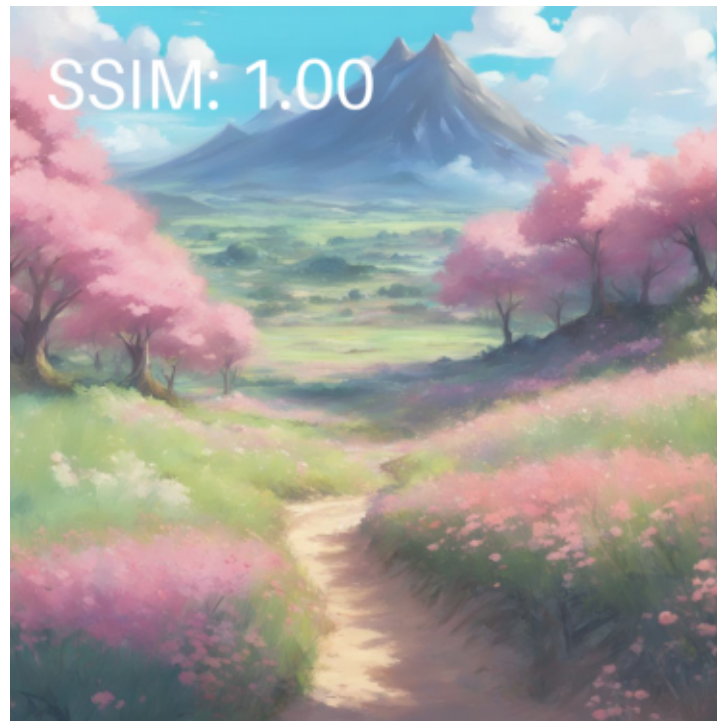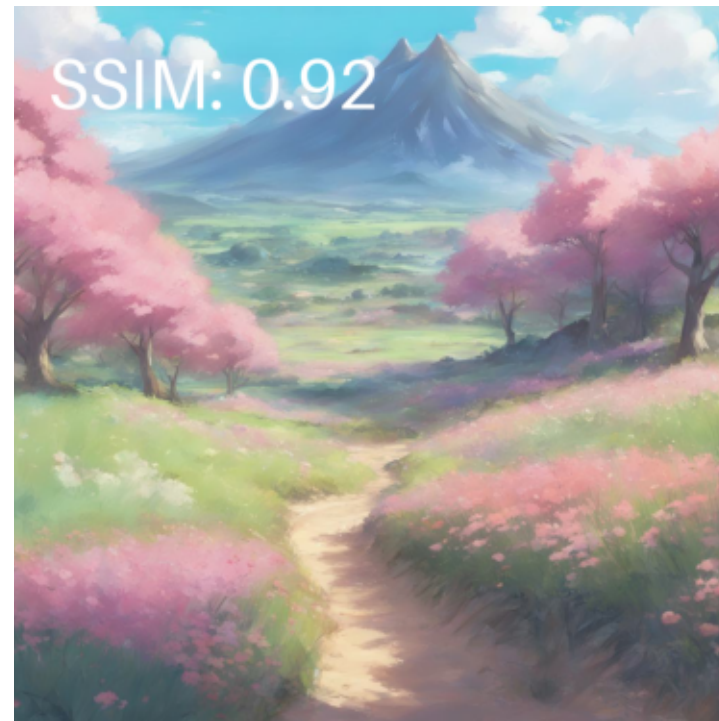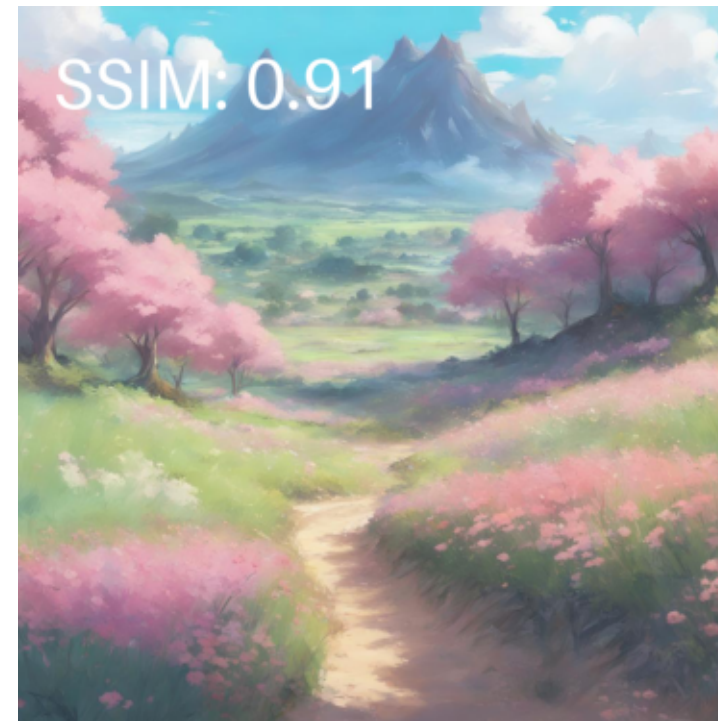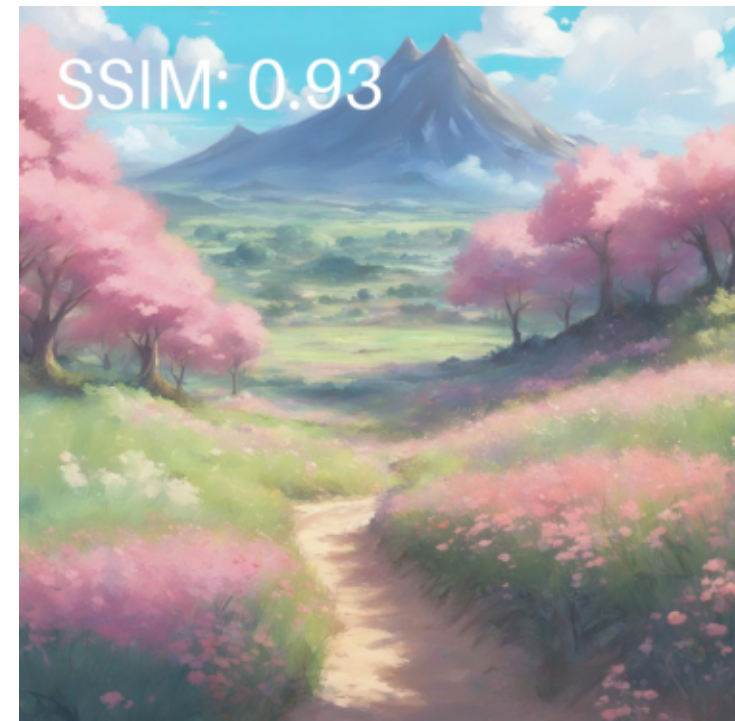

Step 100

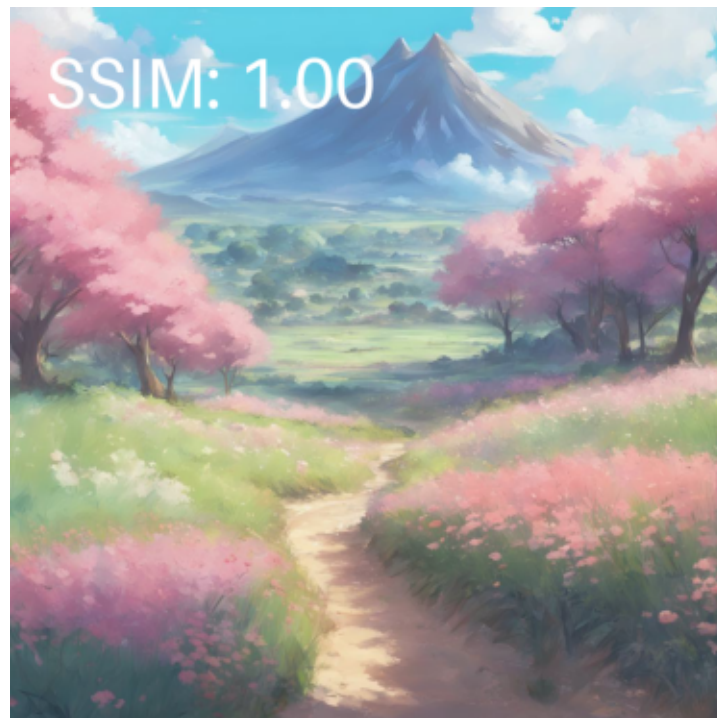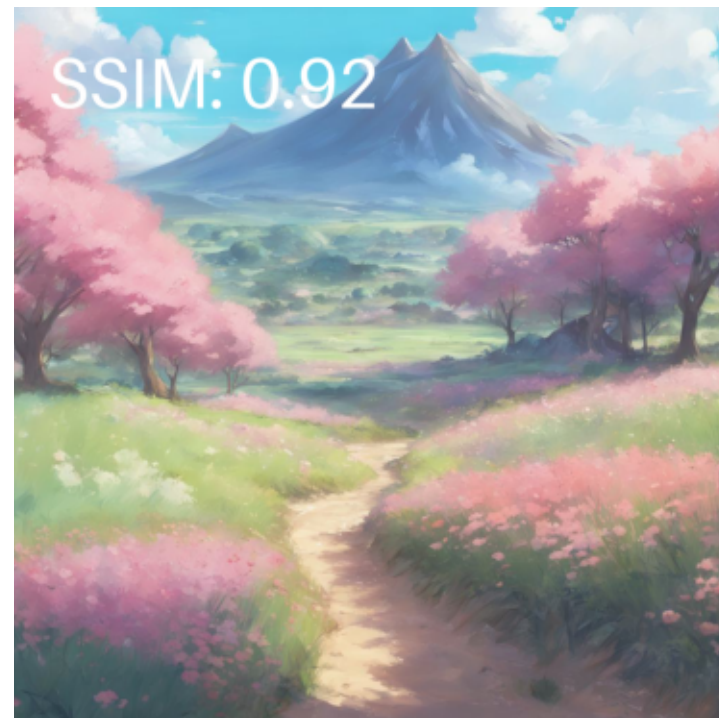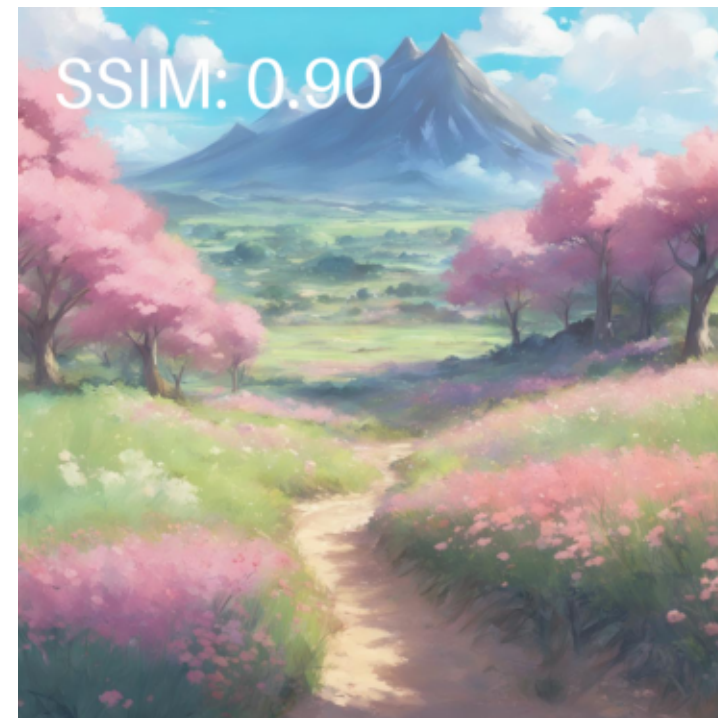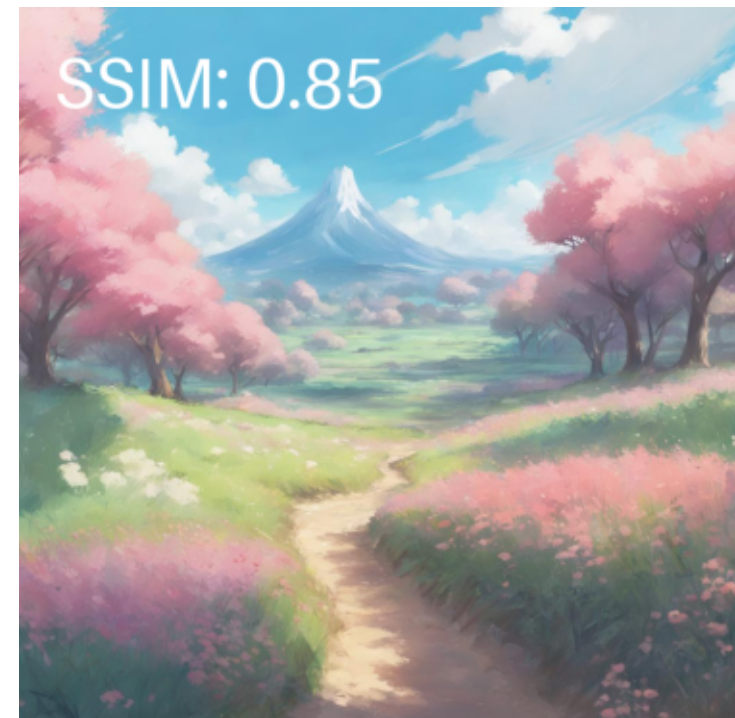

Step 200

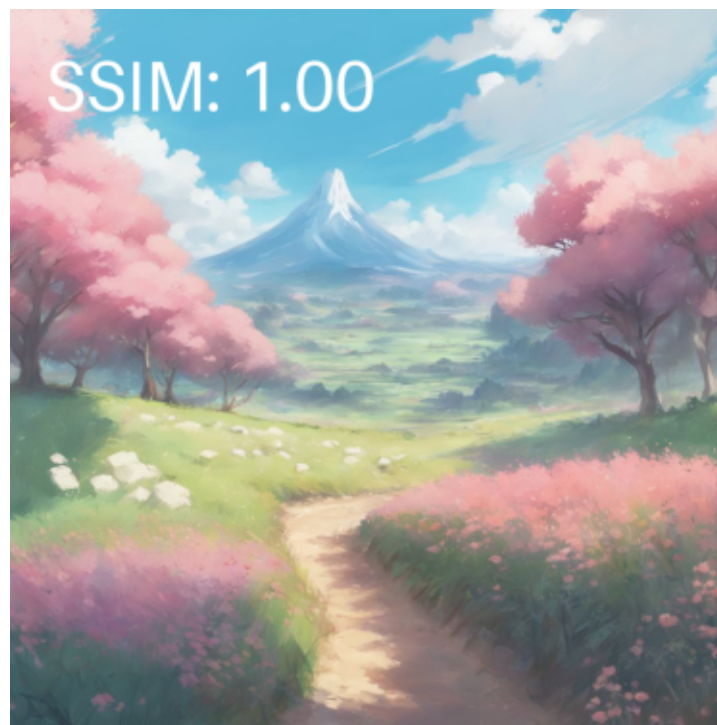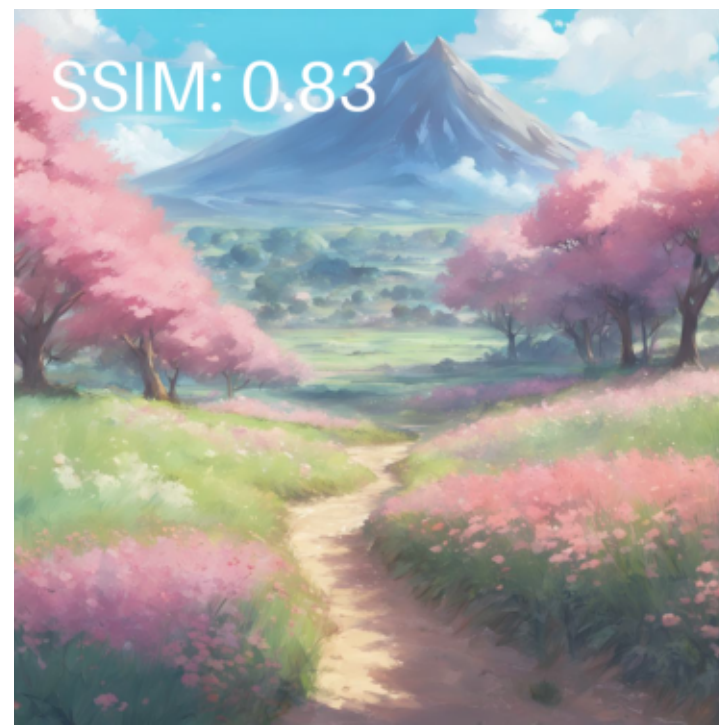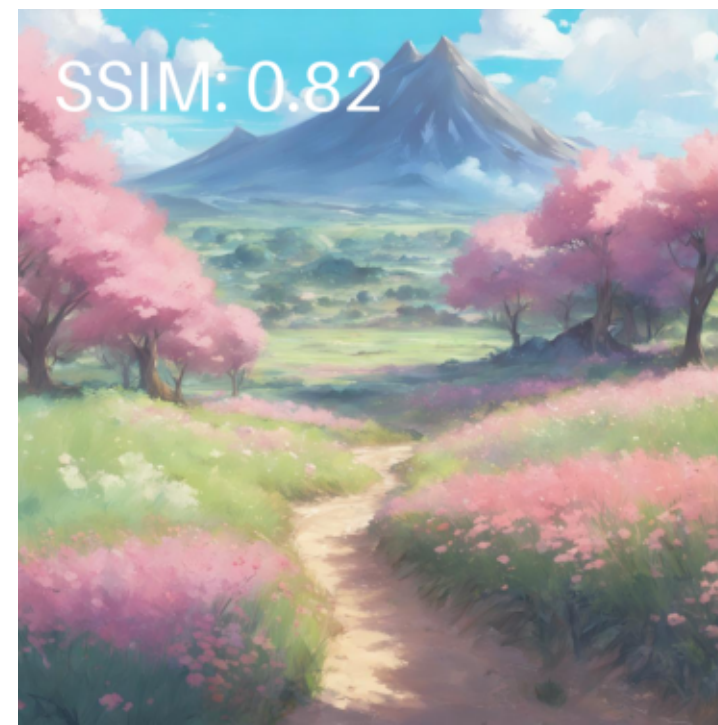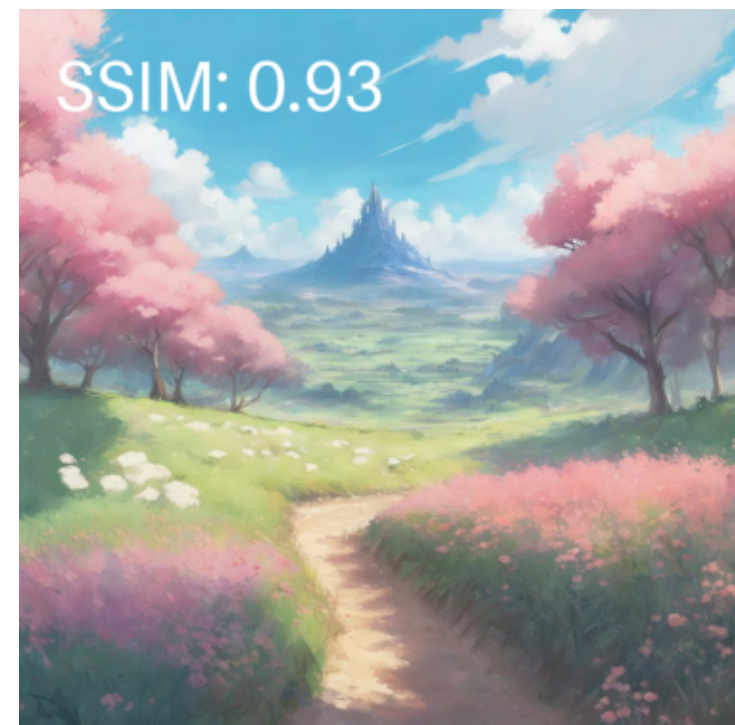



a beautiful matte painting of glass forest, m. c. escher and gustave dore and sam spratt,  
cinematic, dynamic lighting, concept art, realistic, realism, colorful

FP32

M4E3

+SR

+WSR(p=4)

Step 40

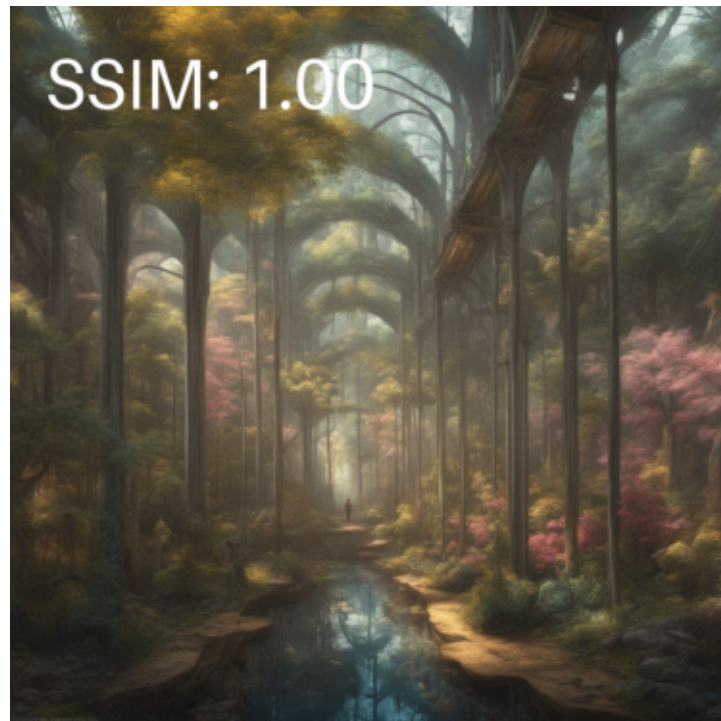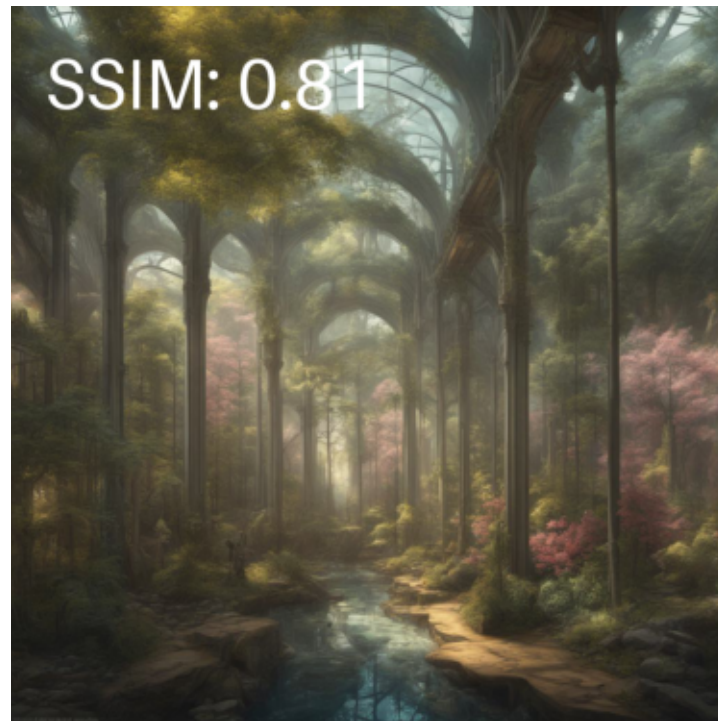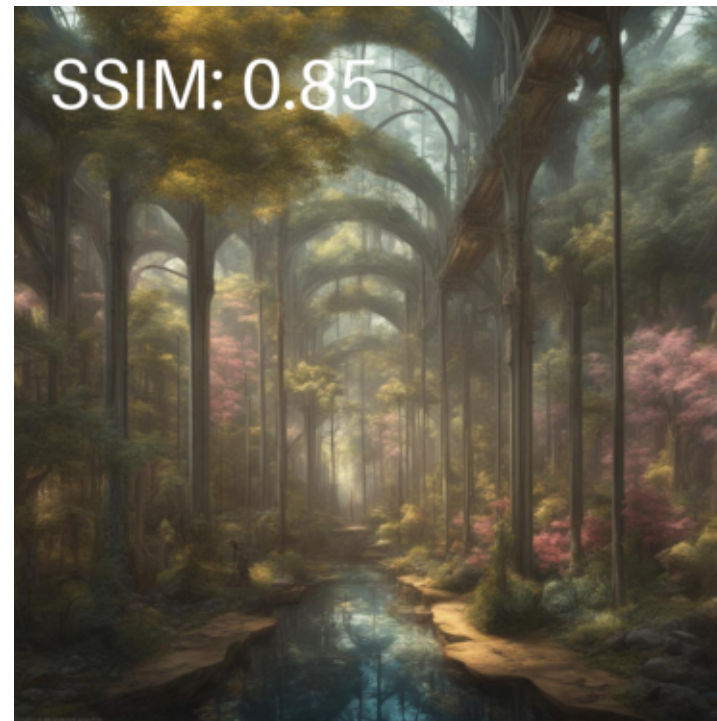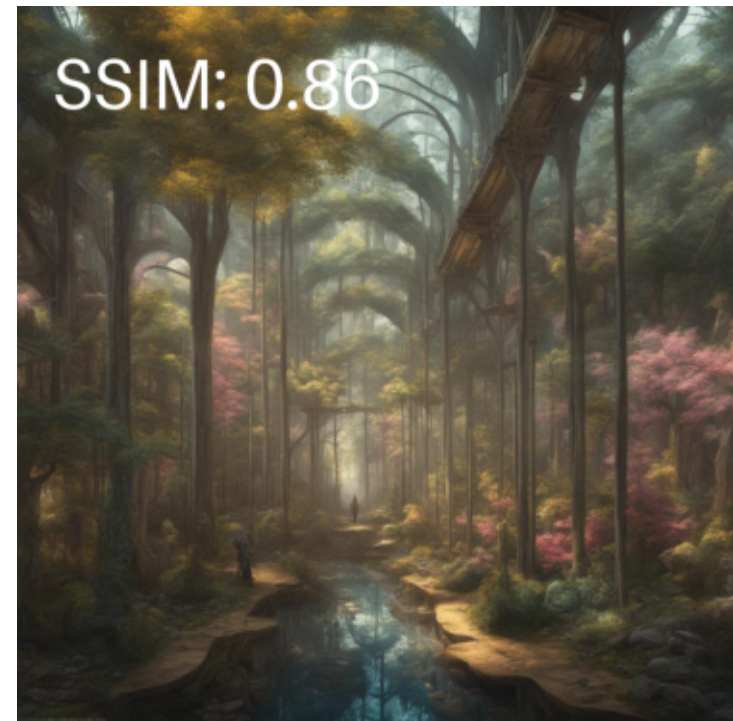

Step 100

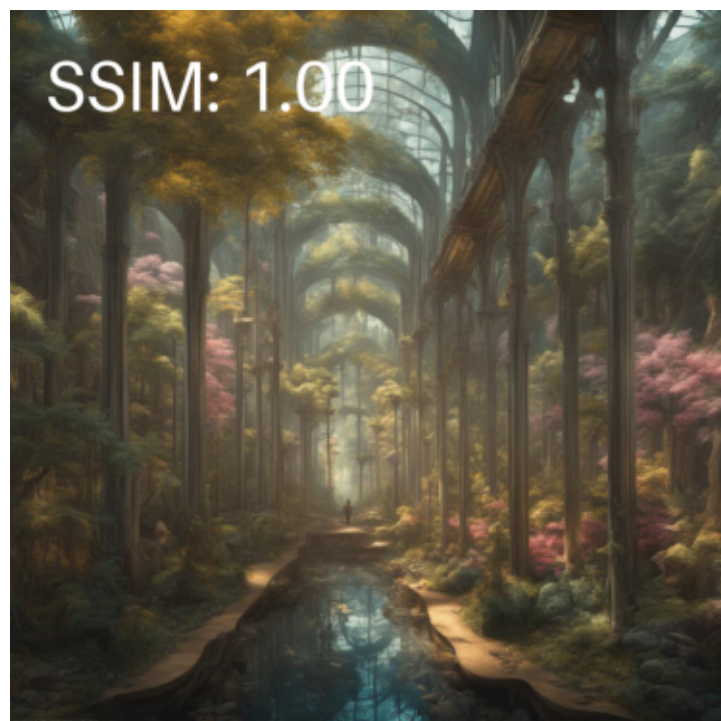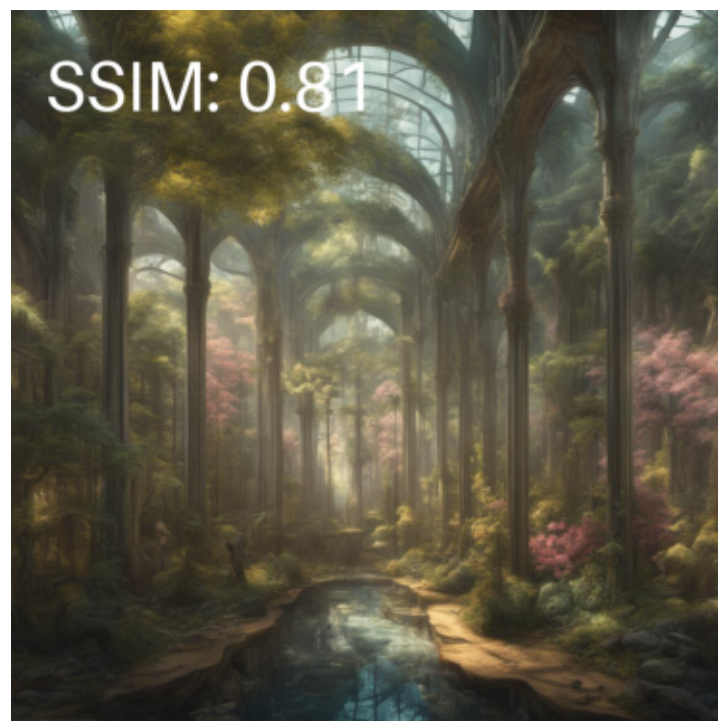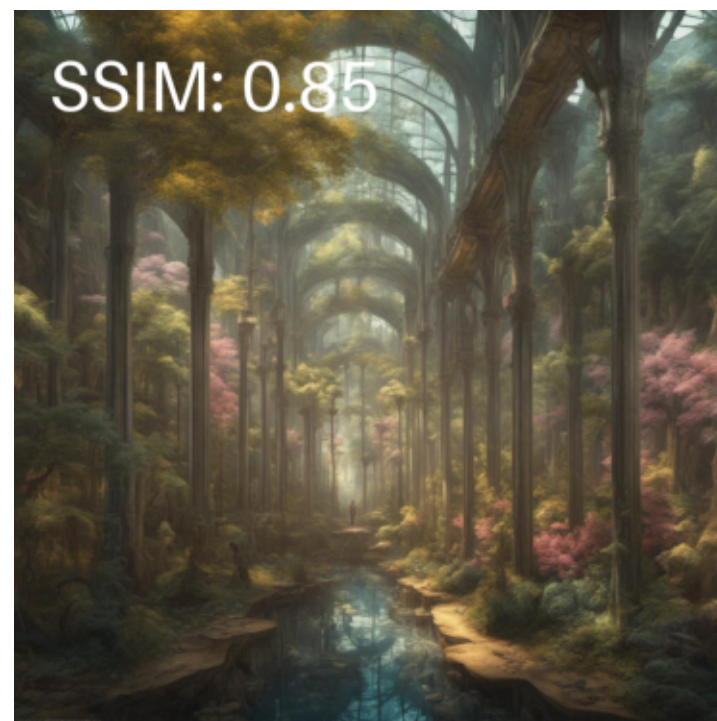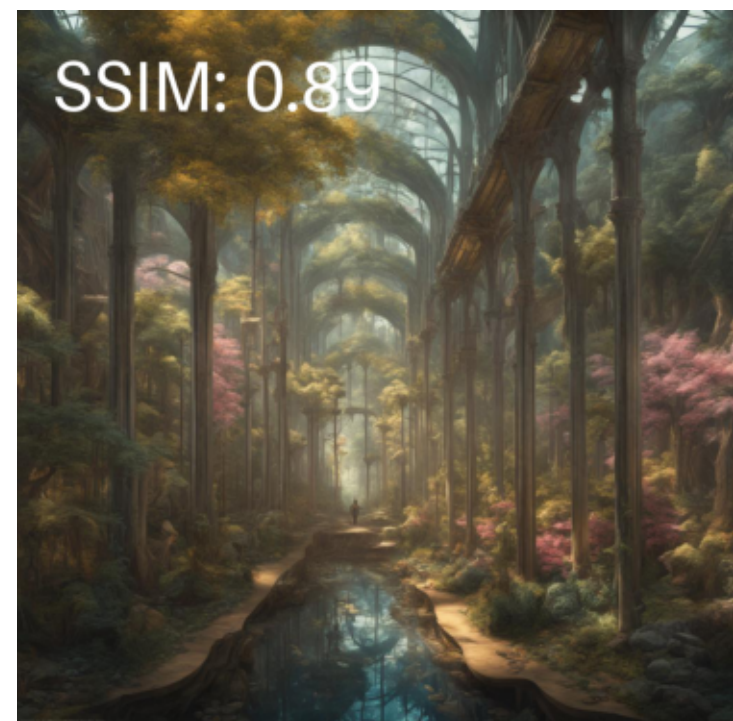

Step 200

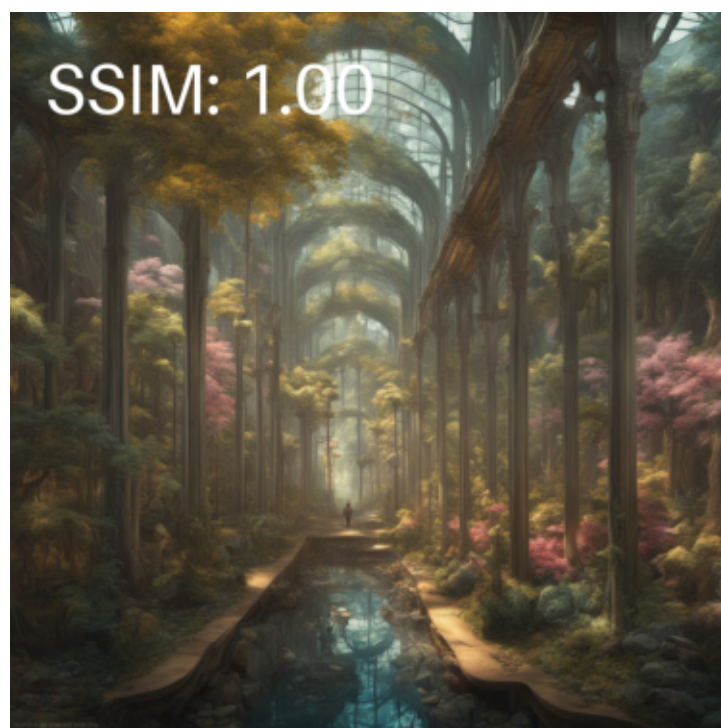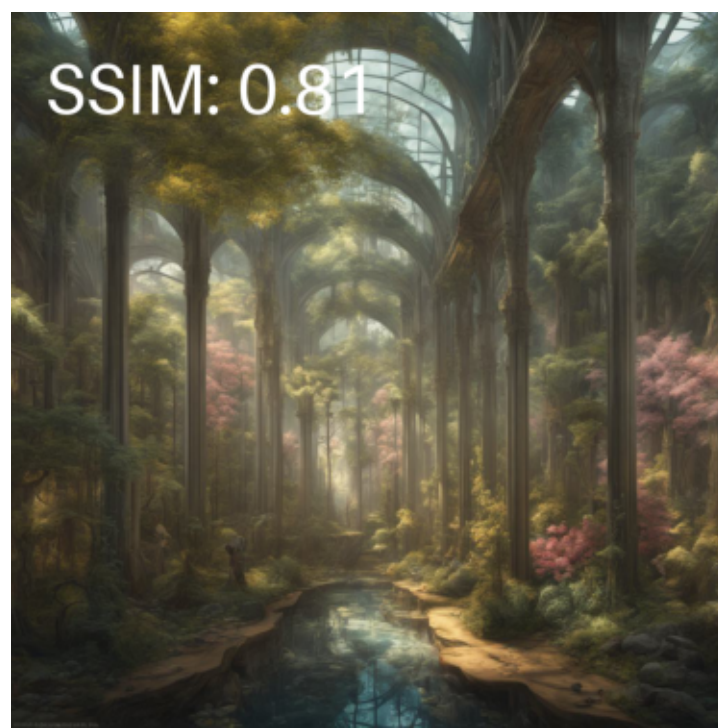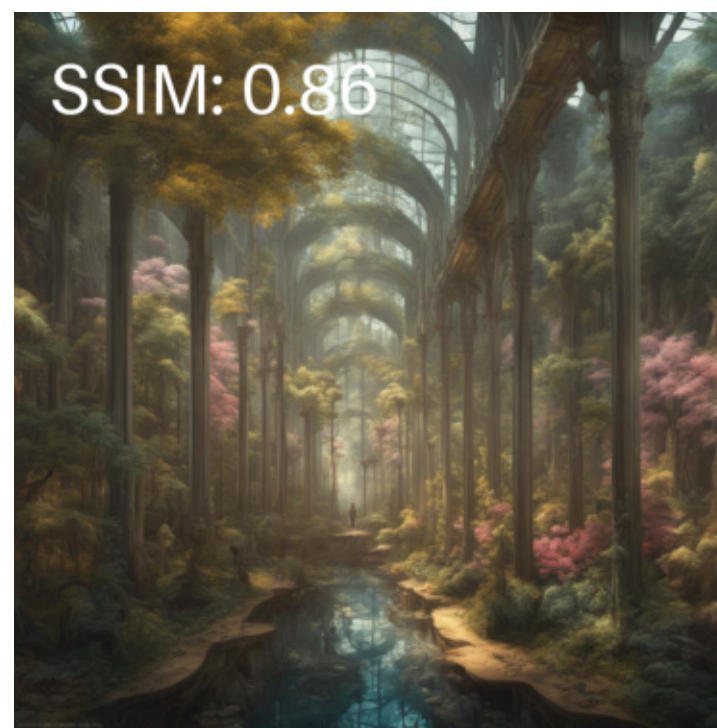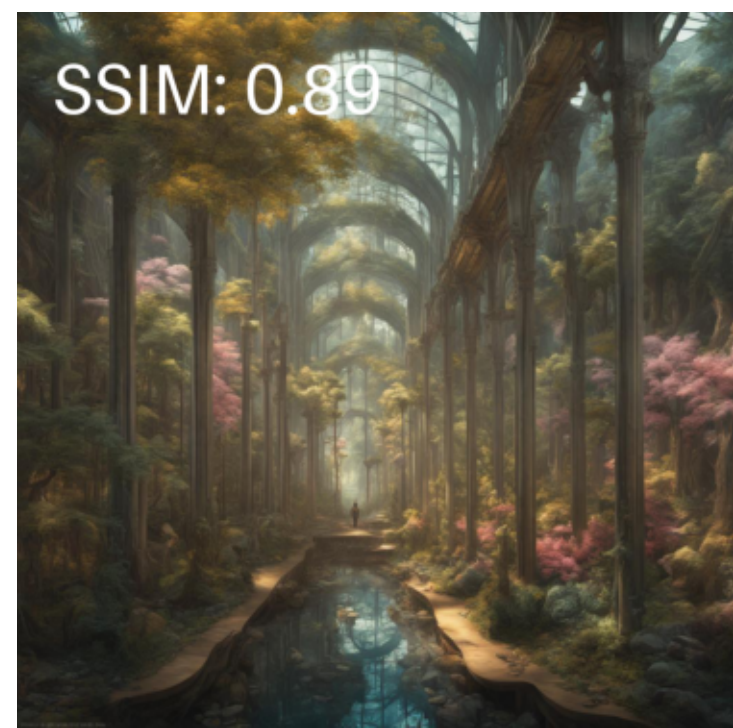



kylie minogue making pancakes, animation pixar style, by pendleton ward, magali villeneuve, artgerm, rob rey and kentaro miura style, golden ratio, trending on art station

FP32

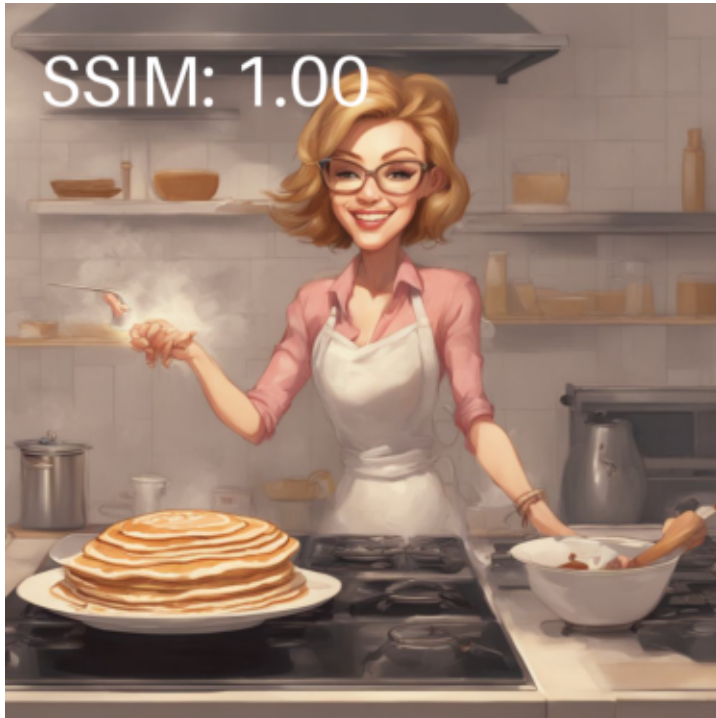

M4E3

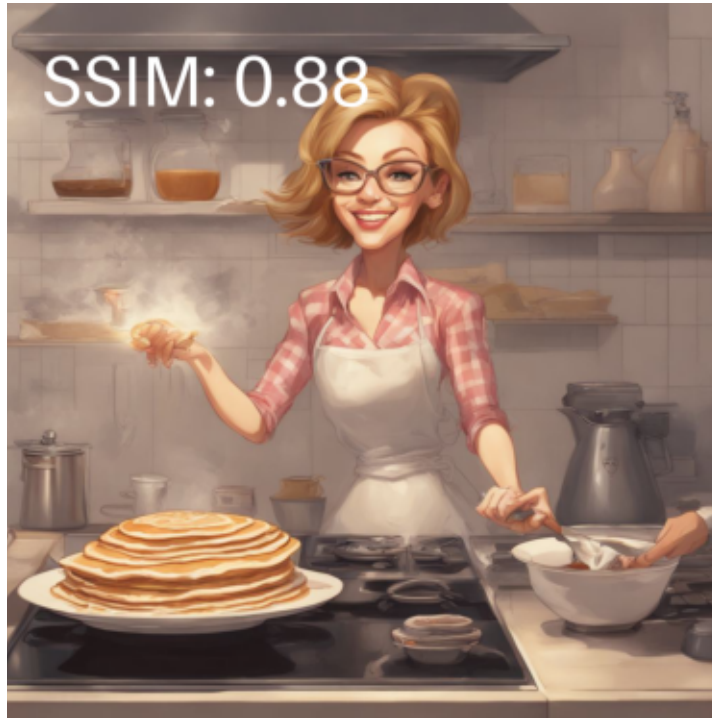

+SR

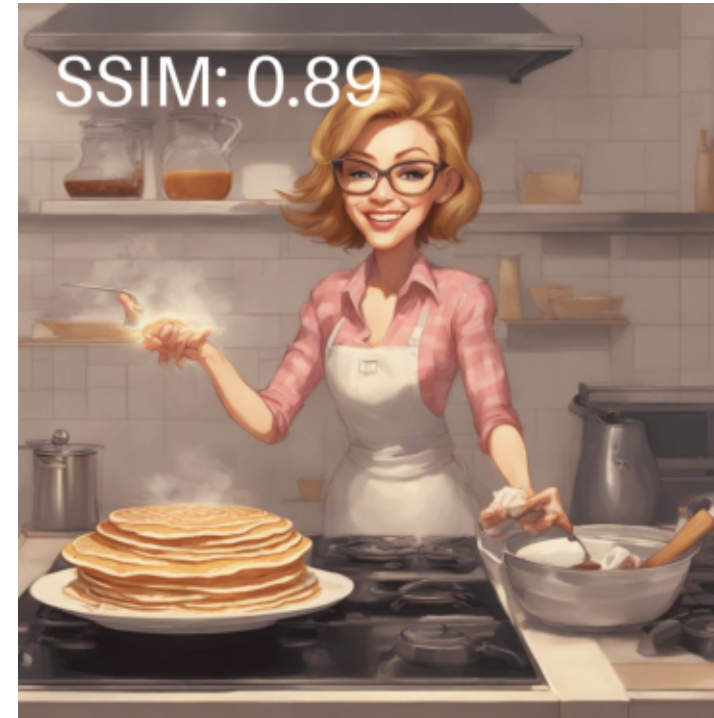

+WSR(p=4)

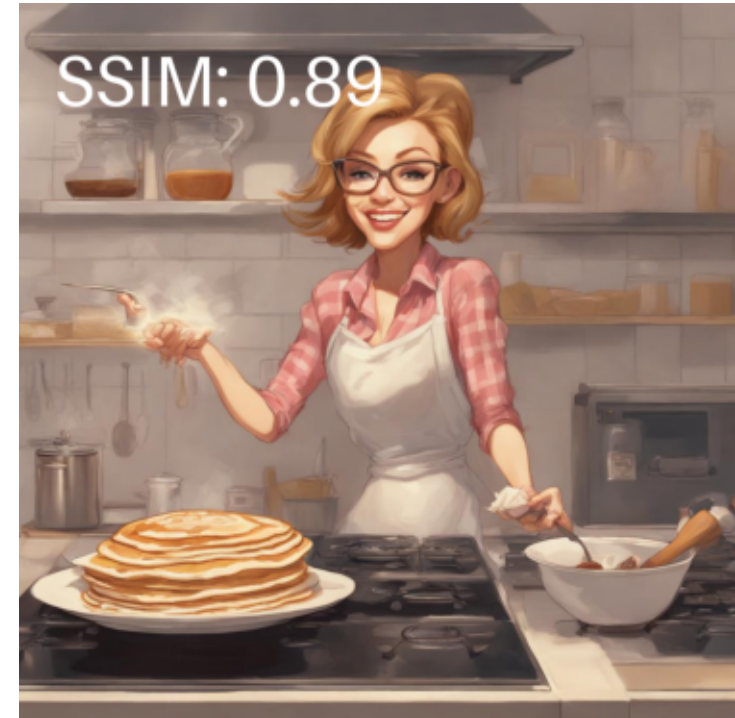

Step 40

SSIM: 1.00

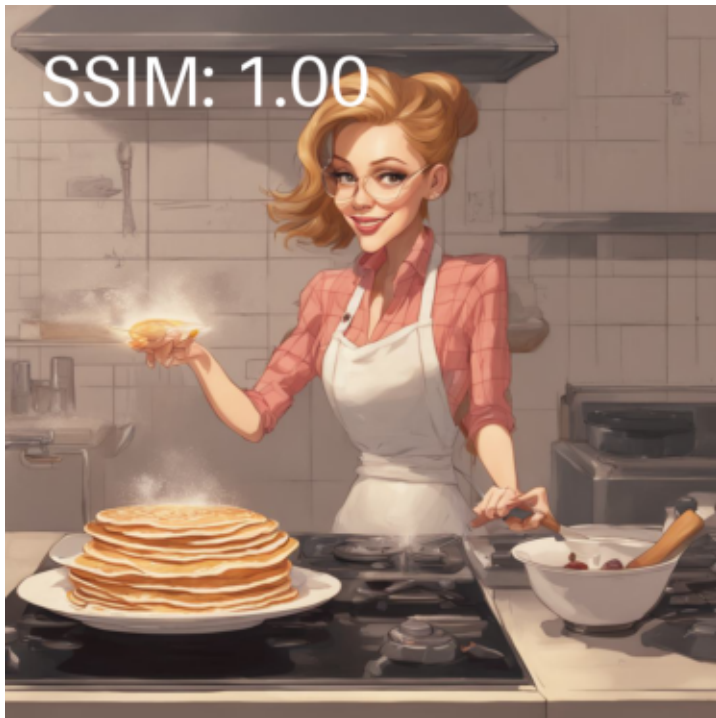

SSIM: 0.84

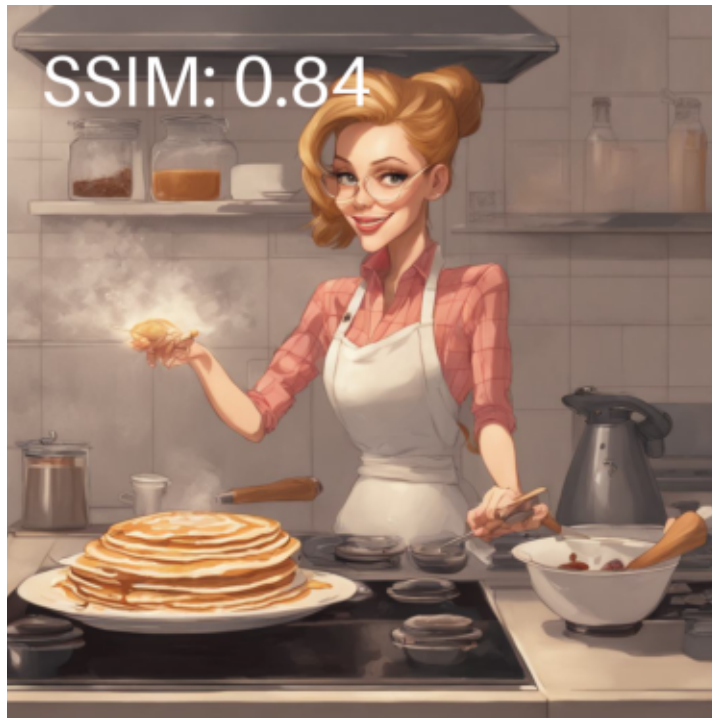

SSIM: 0.87

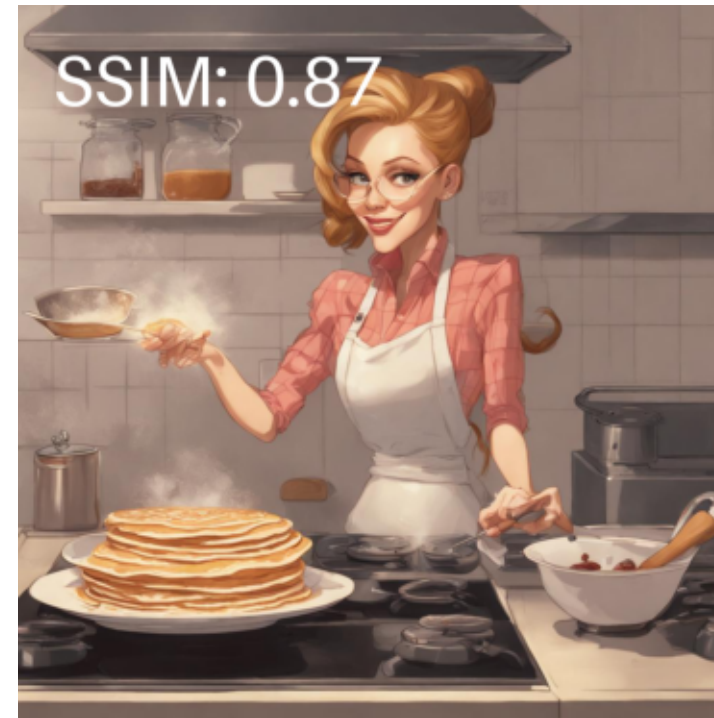

SSIM: 0.87

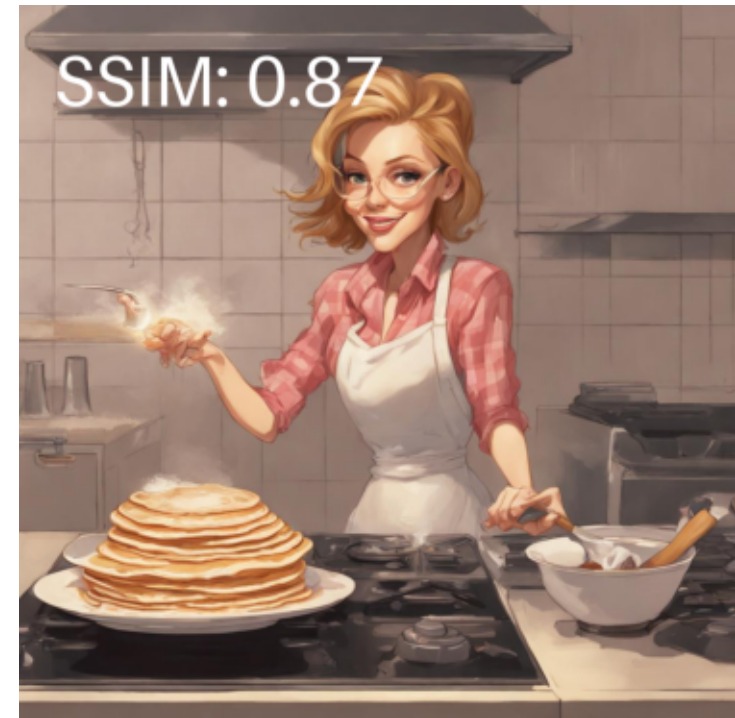

Step 100

SSIM: 1.00

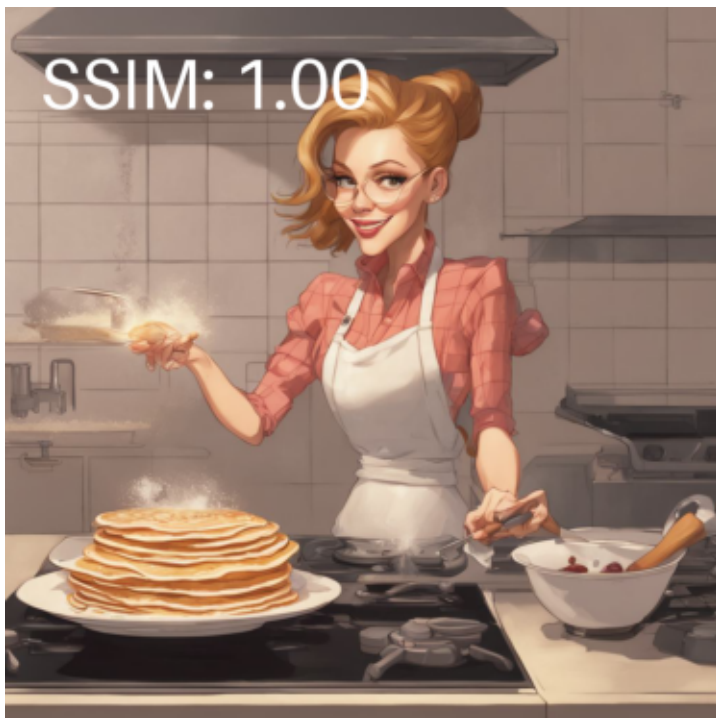

SSIM: 0.81

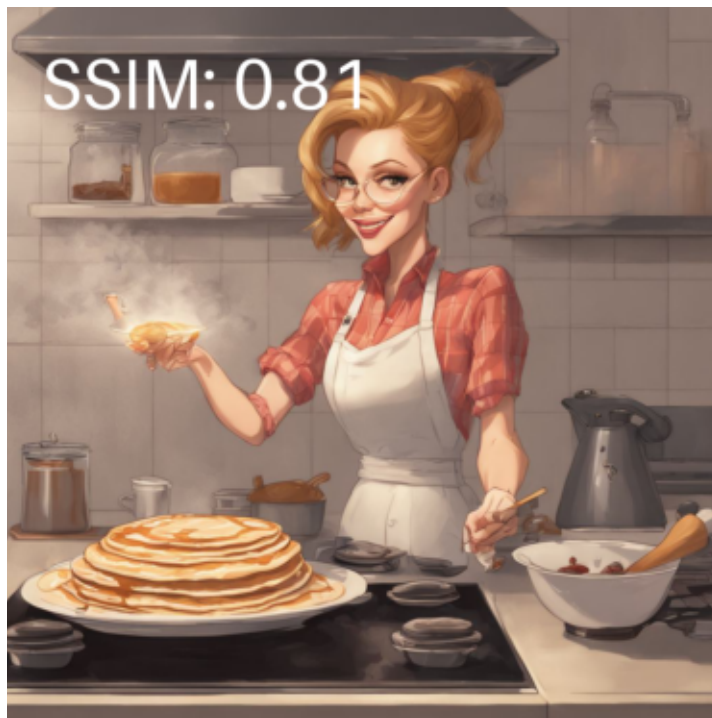

SSIM: 0.85

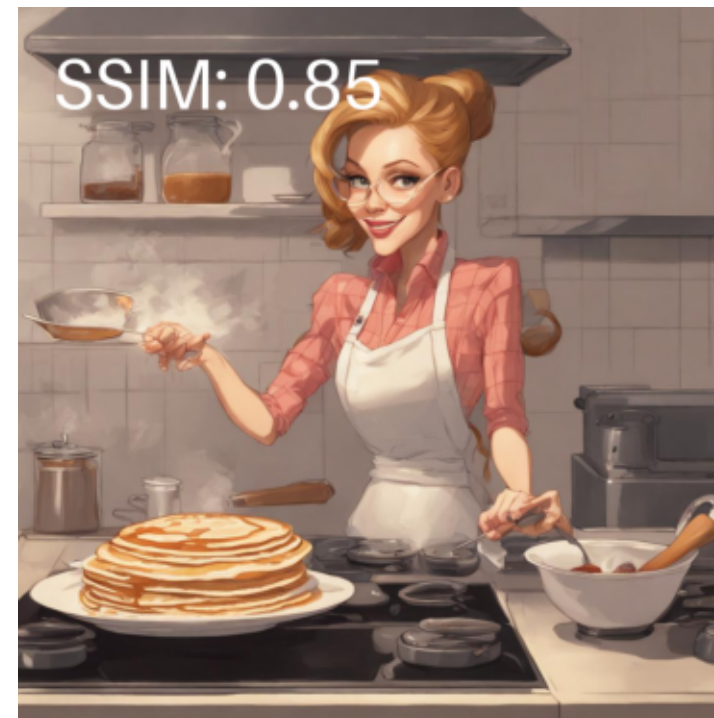

SSIM: 0.92

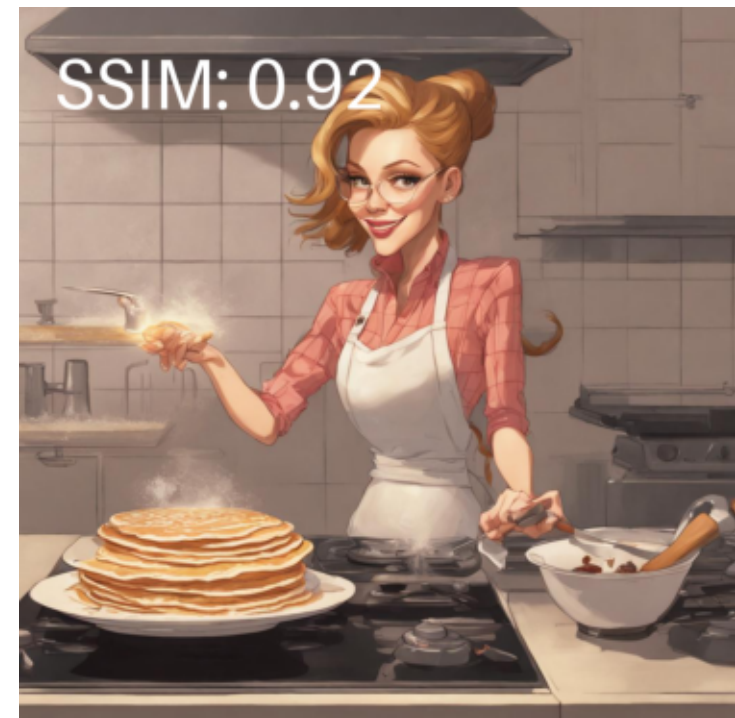

Step 200



portrait knights of zodiac girl, golden and copper shining armor, karate pose, in ruined agora of  
athens sunrise, ssci - fi and fantasy, intricate and very very beautiful and elegant, highly  
detailed, digital painting, artstation, concept art, smooth and sharp focus, illustration, art by  
tian zi and wlop and alphonse mucha and z - - ed

FP32

M4E3

+SR

+WSR(p=4)

Step 40

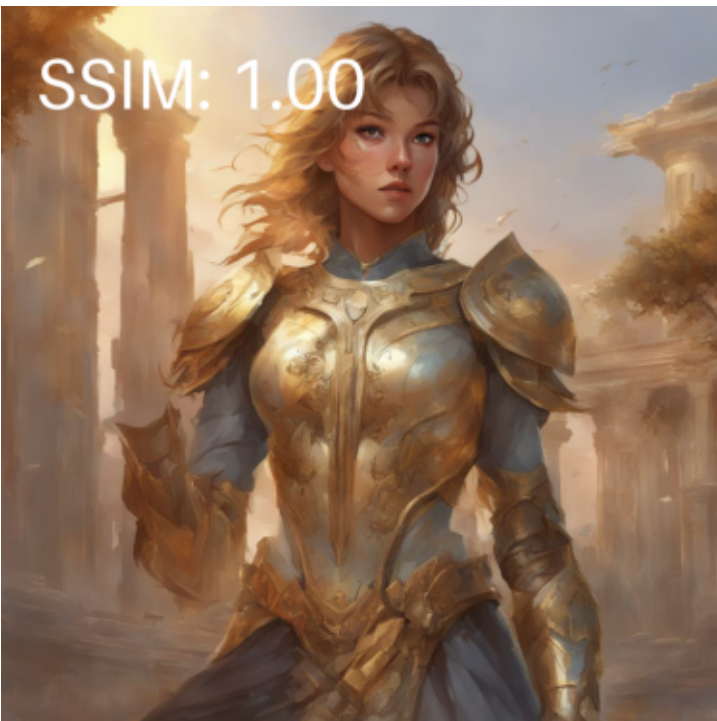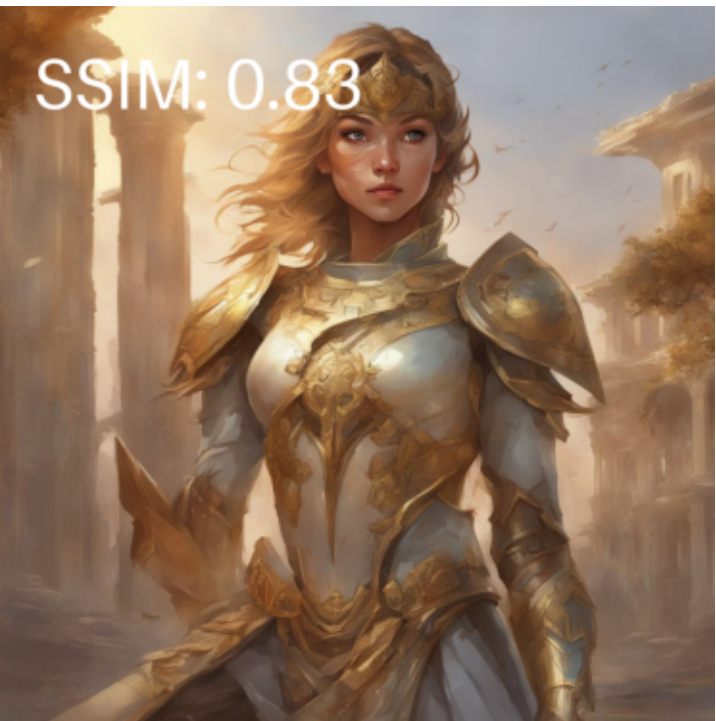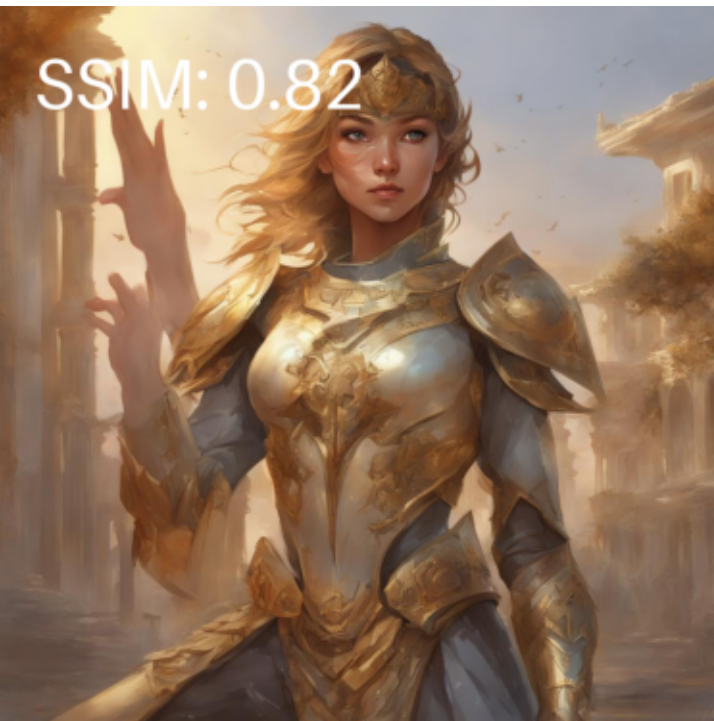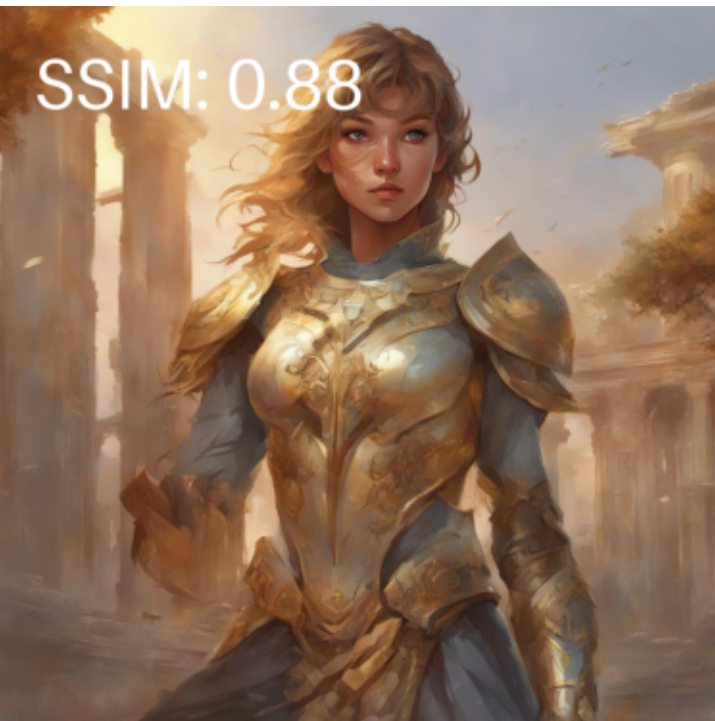

Step 100

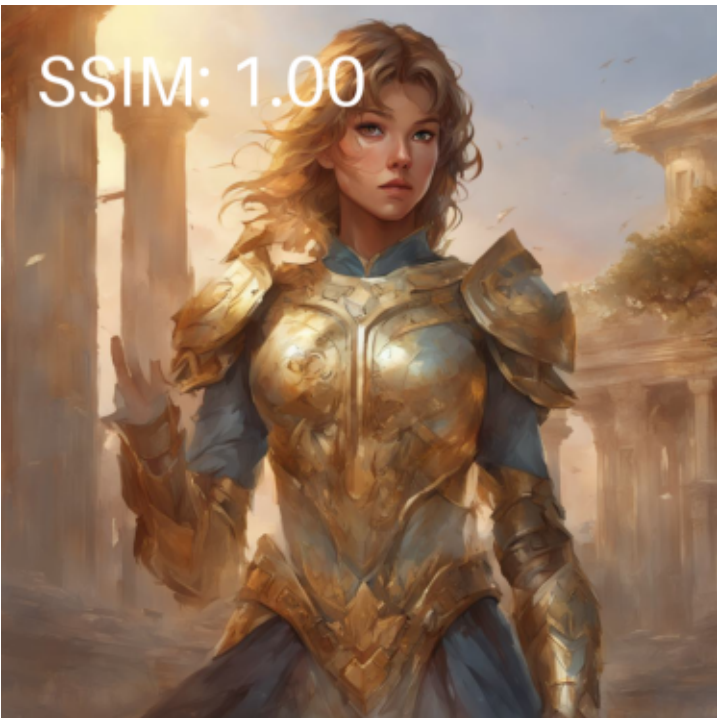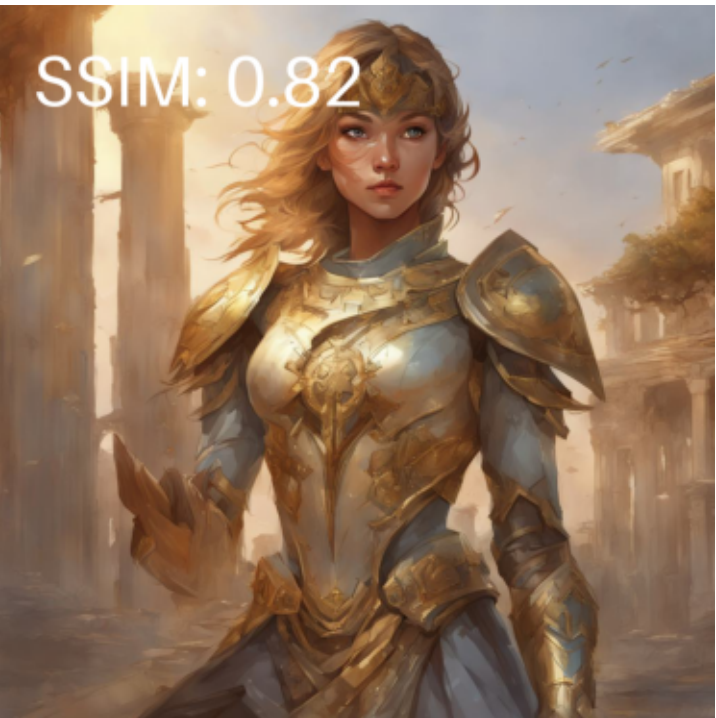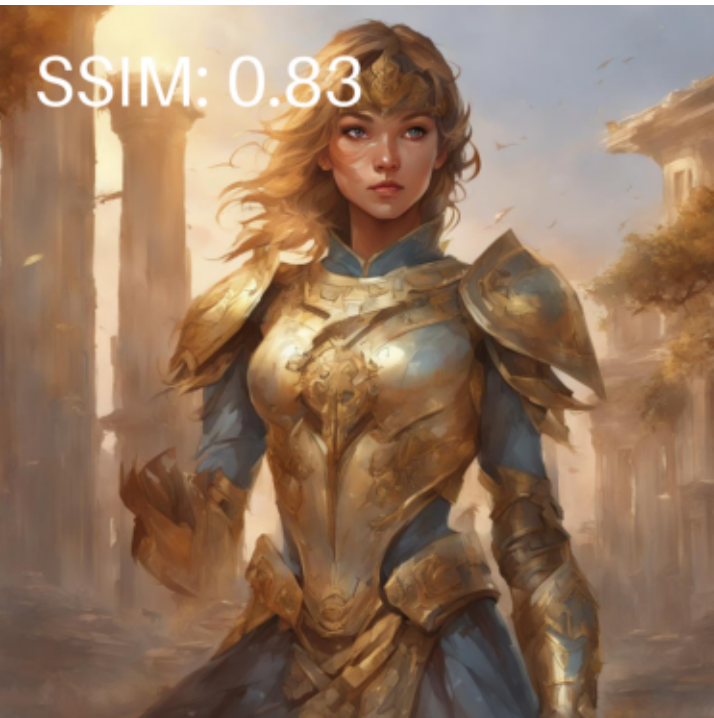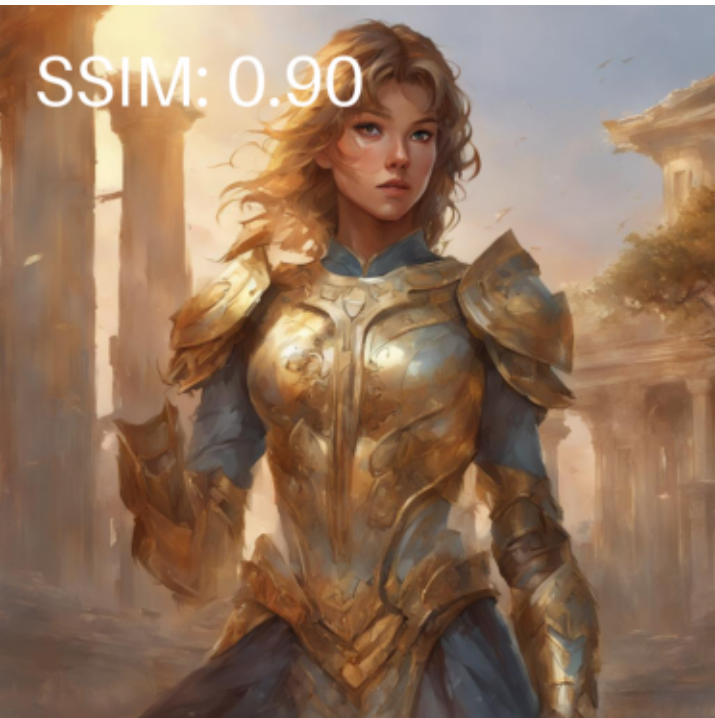

Step 200

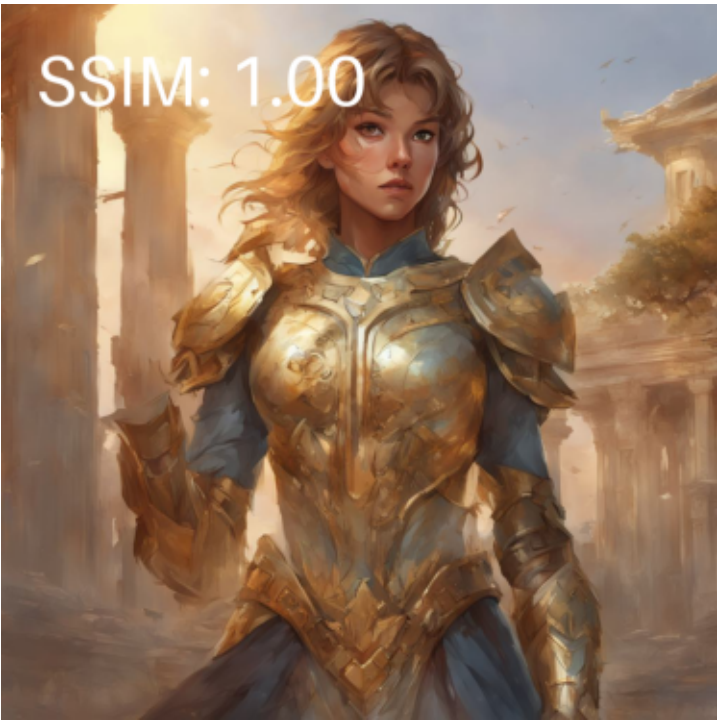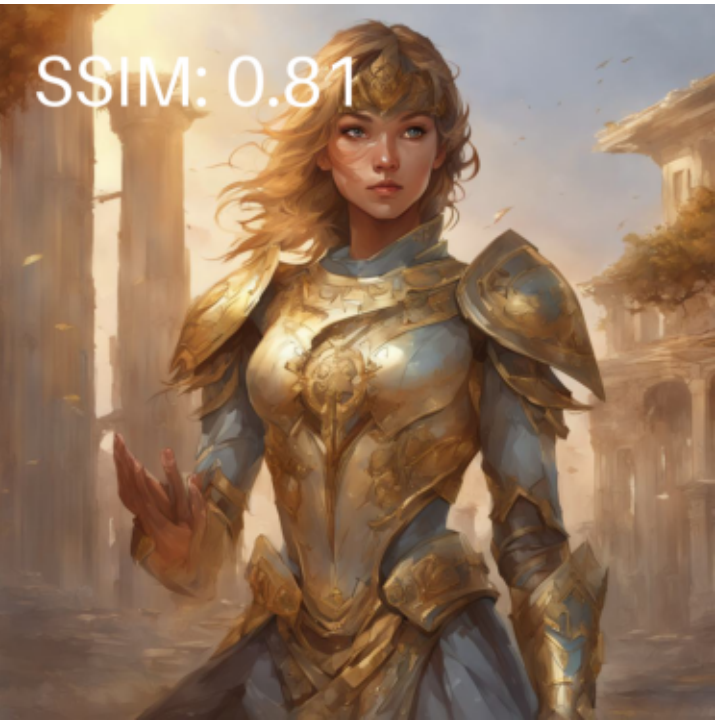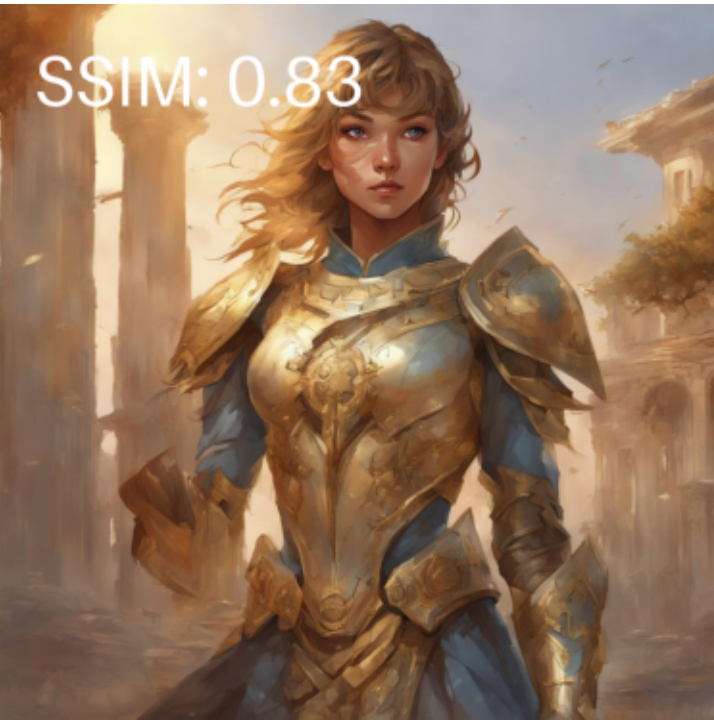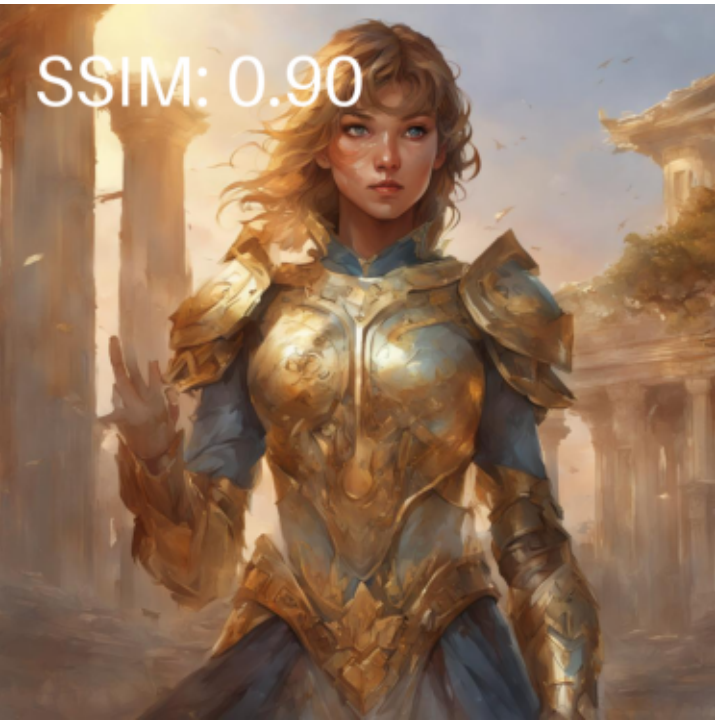



a gladiator in roman times, intricate, elegant, volumetric lighting, scenery, digital painting, highly detailed, artstation, sharp focus, illustration, concept art, ruan jia, steve mccurry

FP32

M4E3

+SR

+WSR(p=4)

Step 40

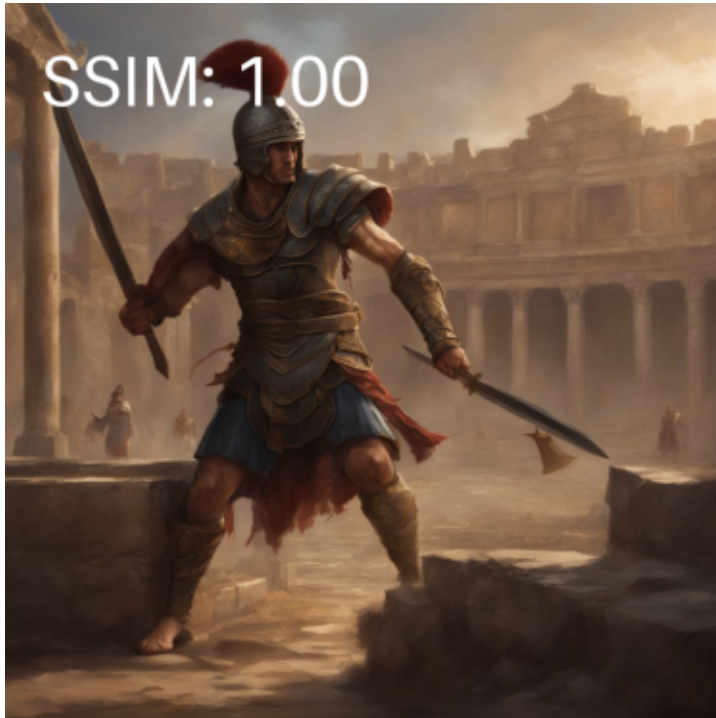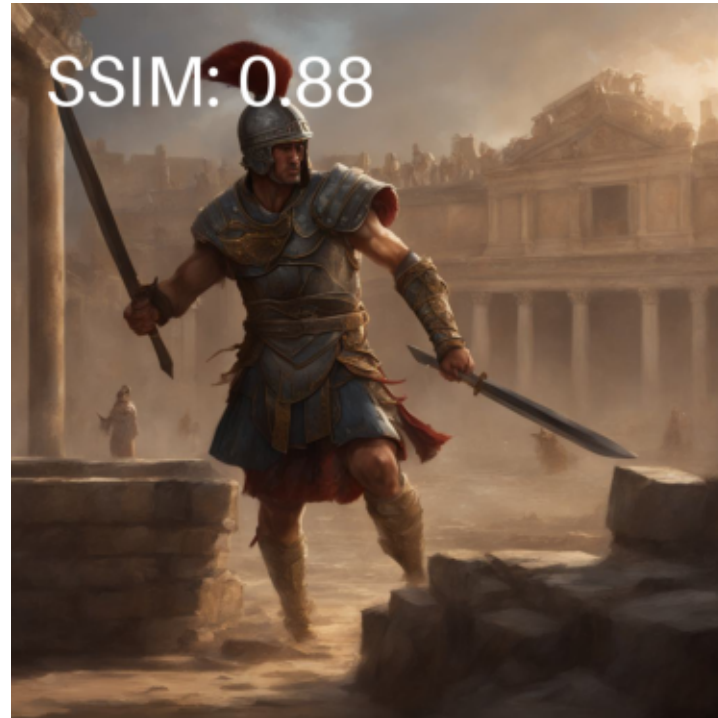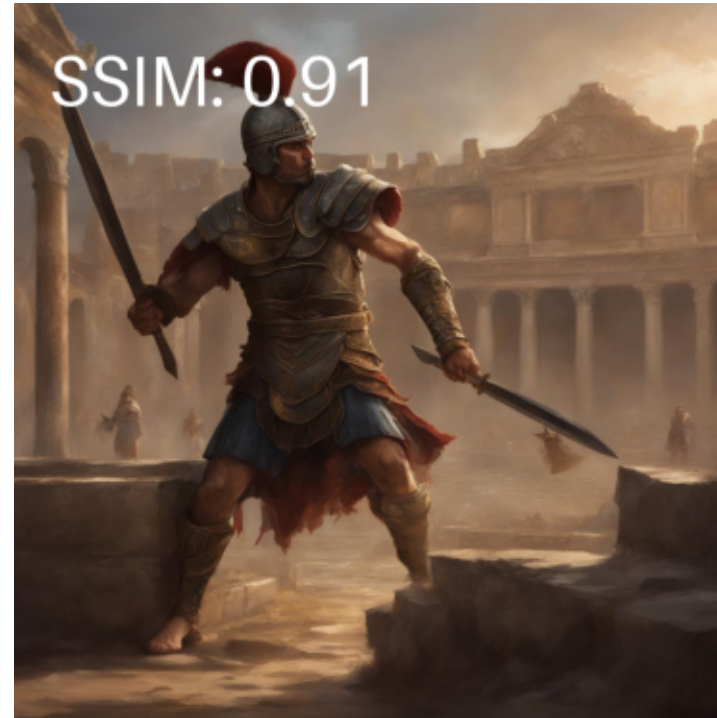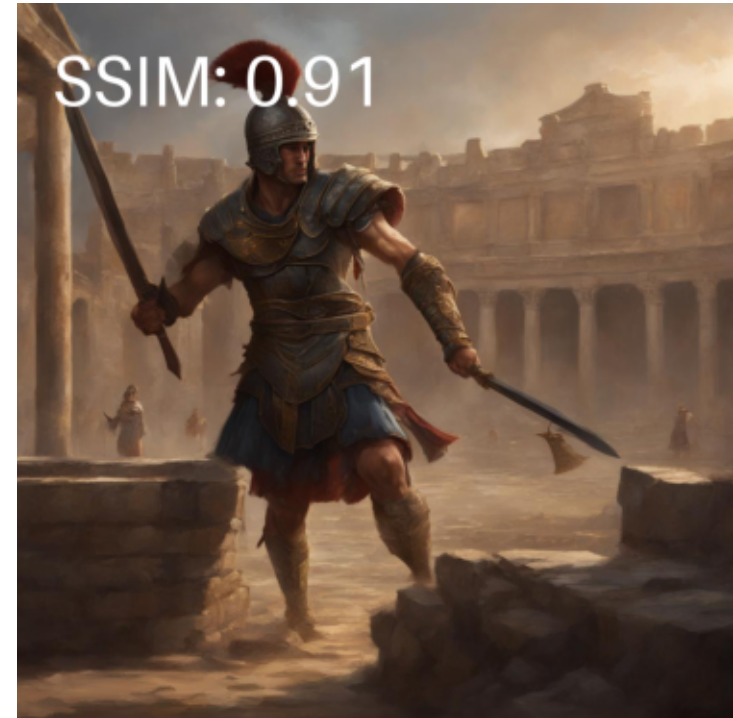

Step 100

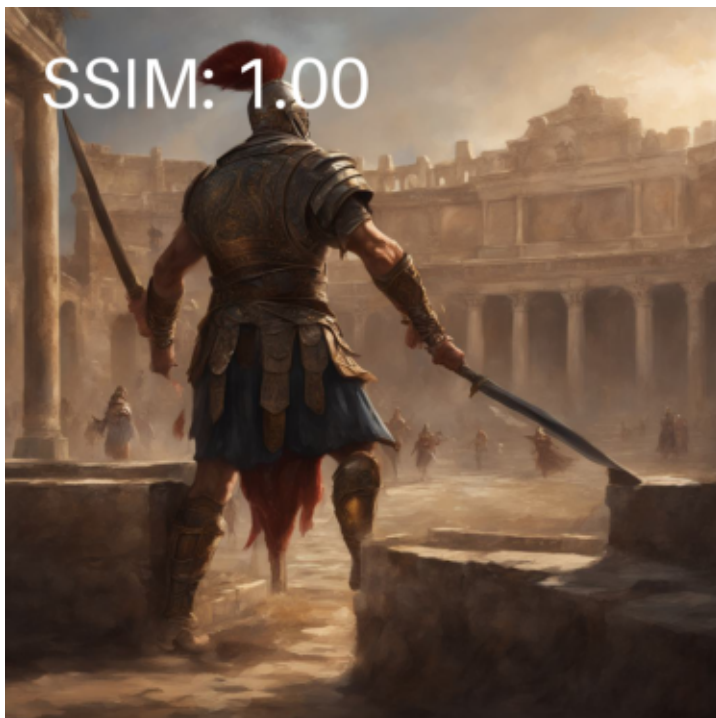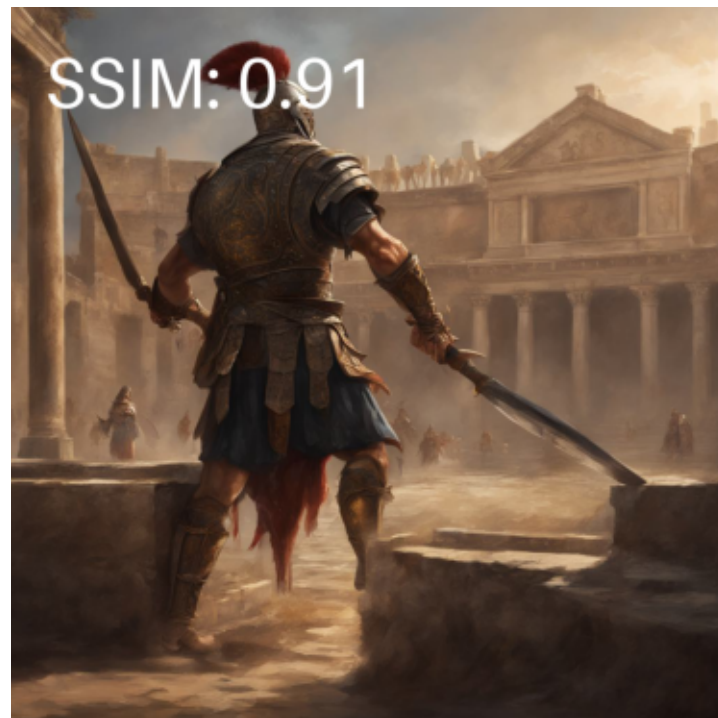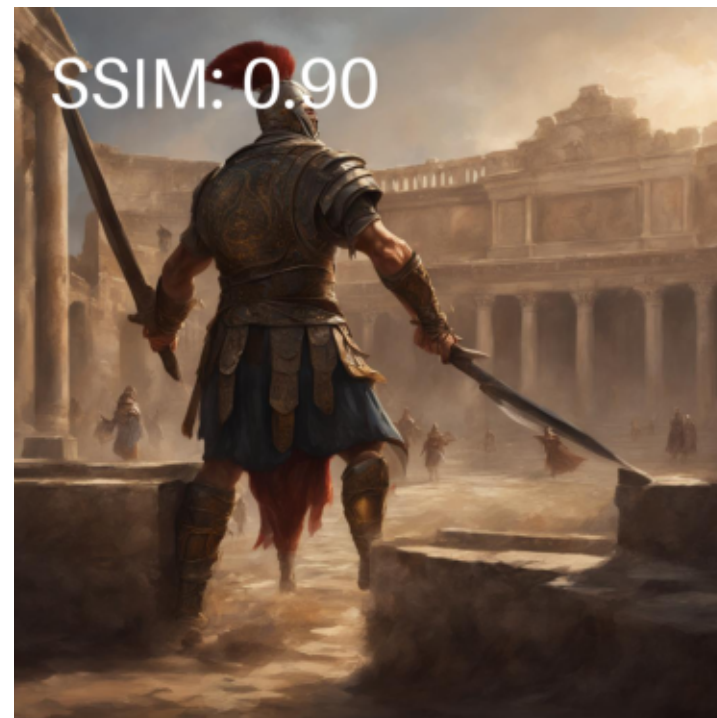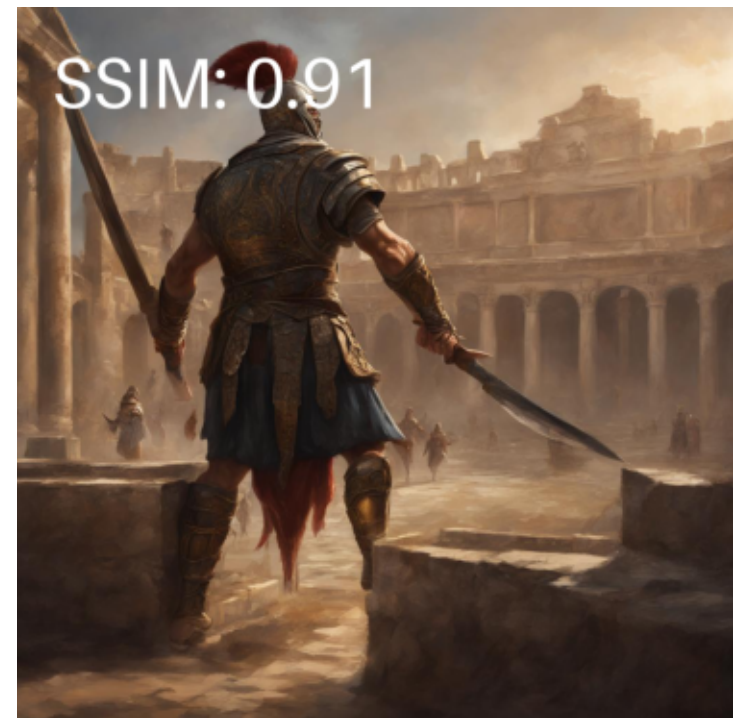

Step 200

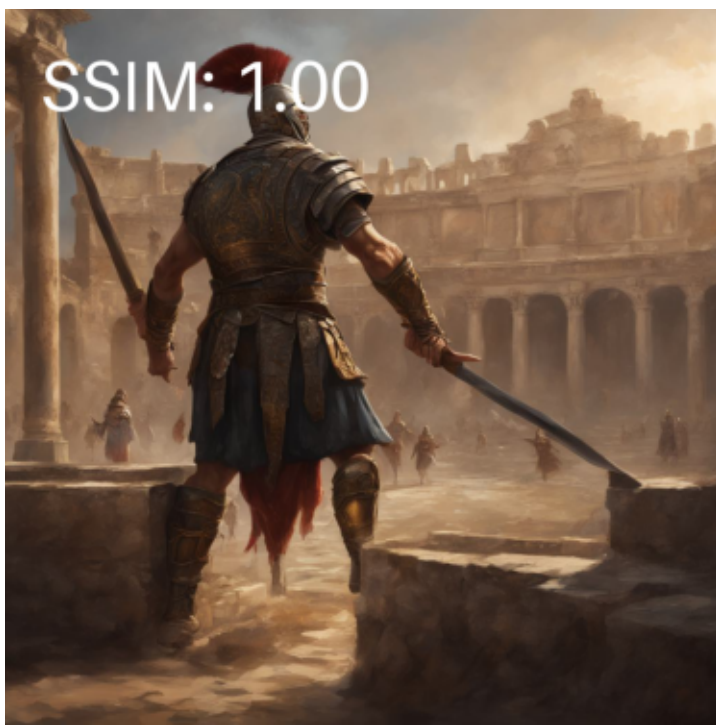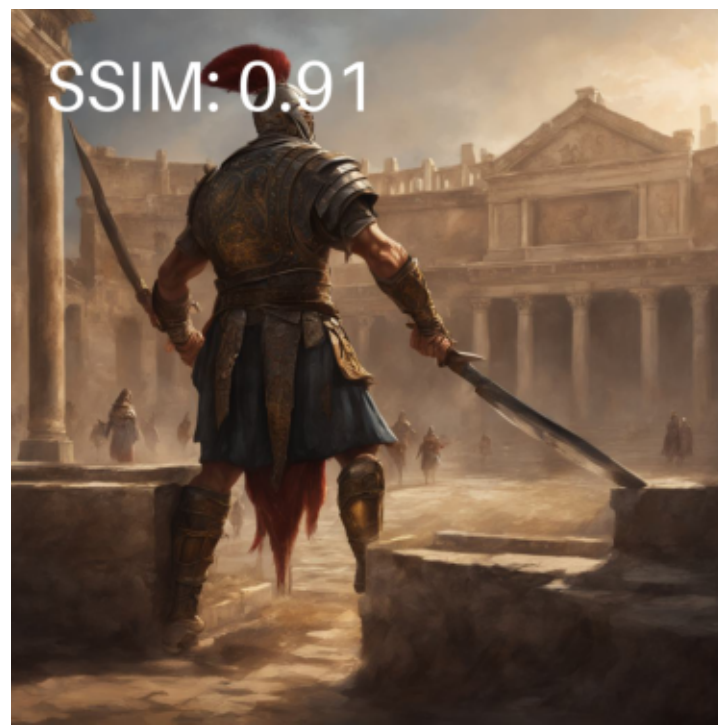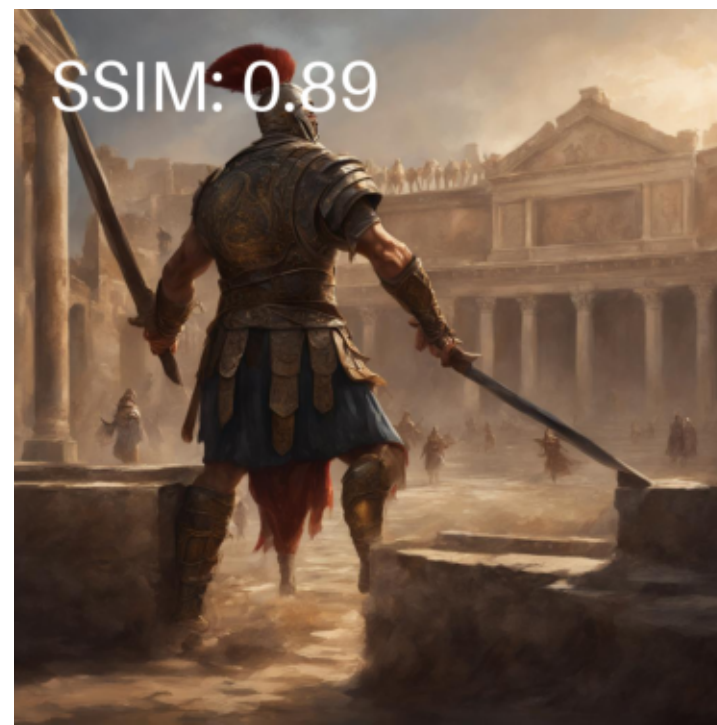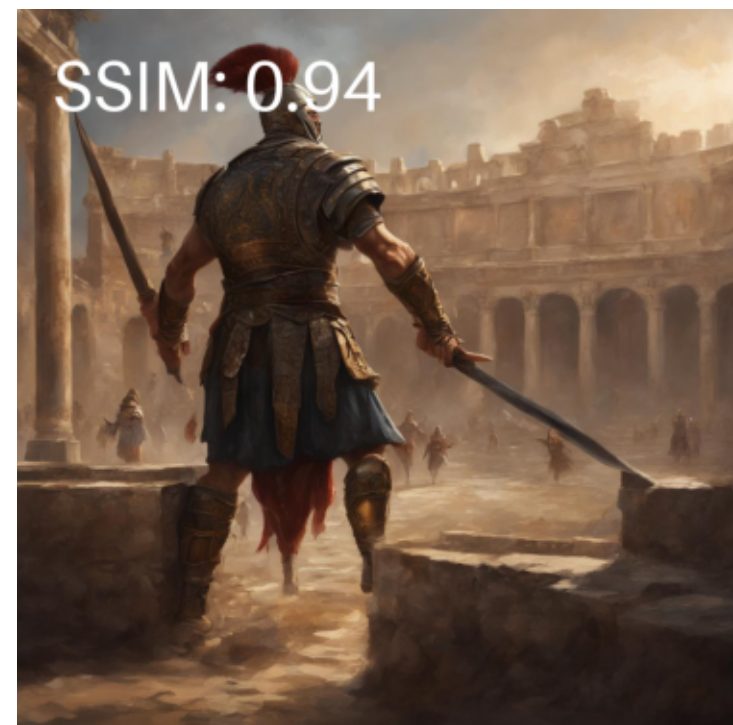



a melting Roman numeral clock in the style of the painting the persistence of memory by Salvador Dali, dynamic lighting, photorealistic fantasy concept art, trending on art station, stunning visuals, creative, cinematic, ultra detailed

FP32

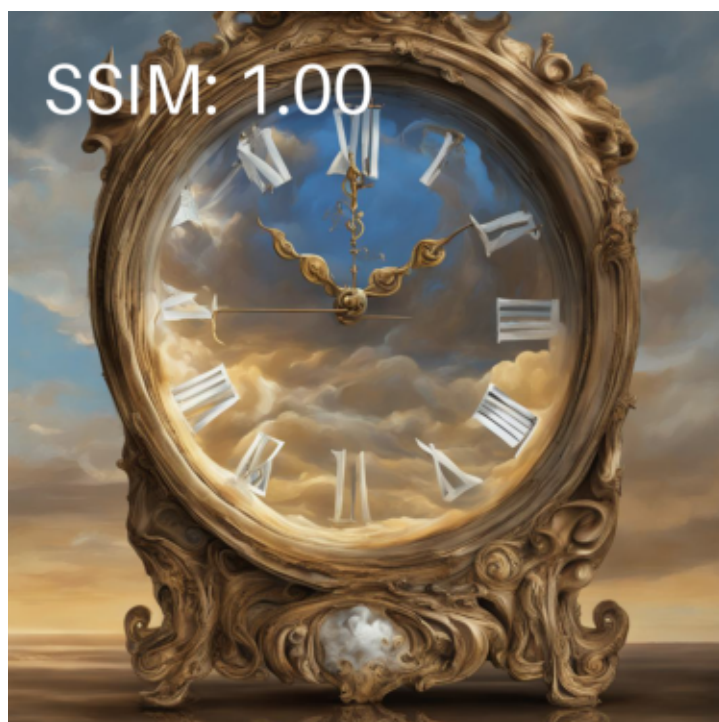

M4E3

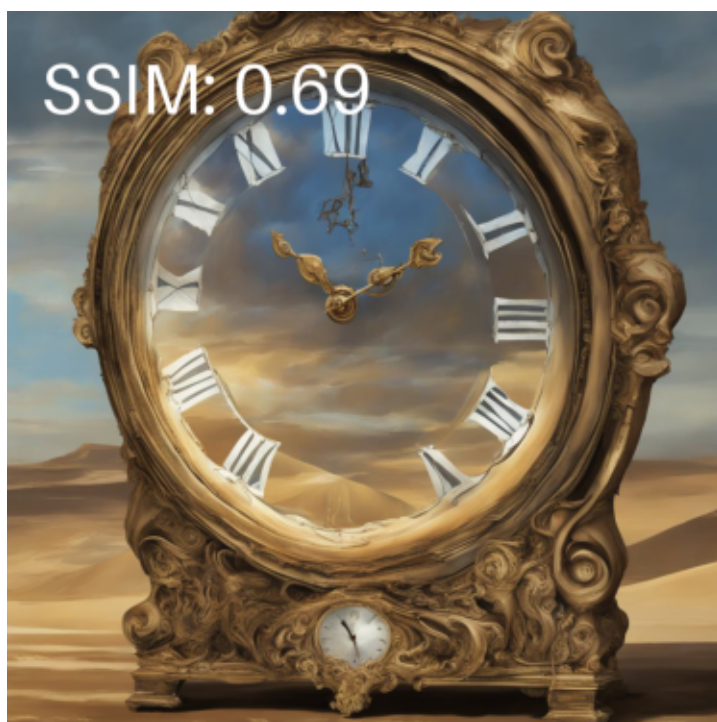

+SR

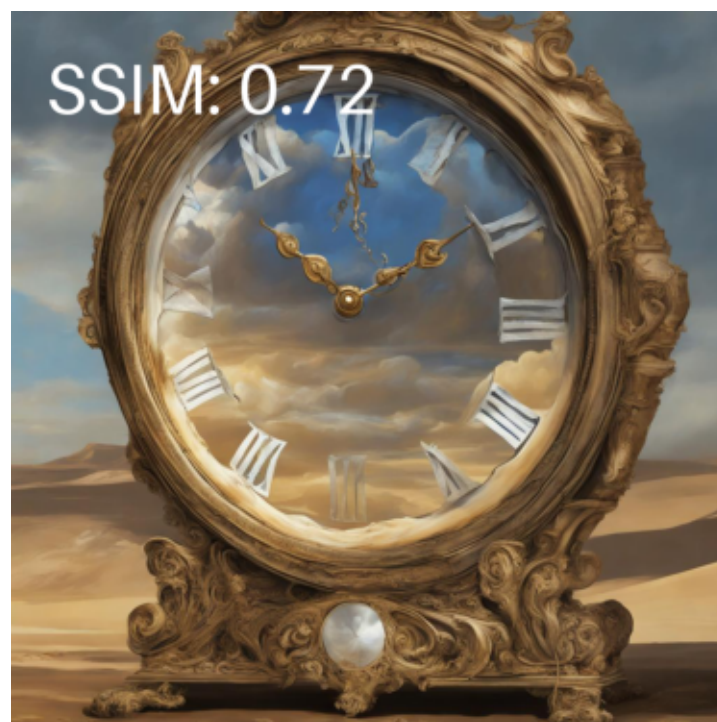

+WSR(p=4)

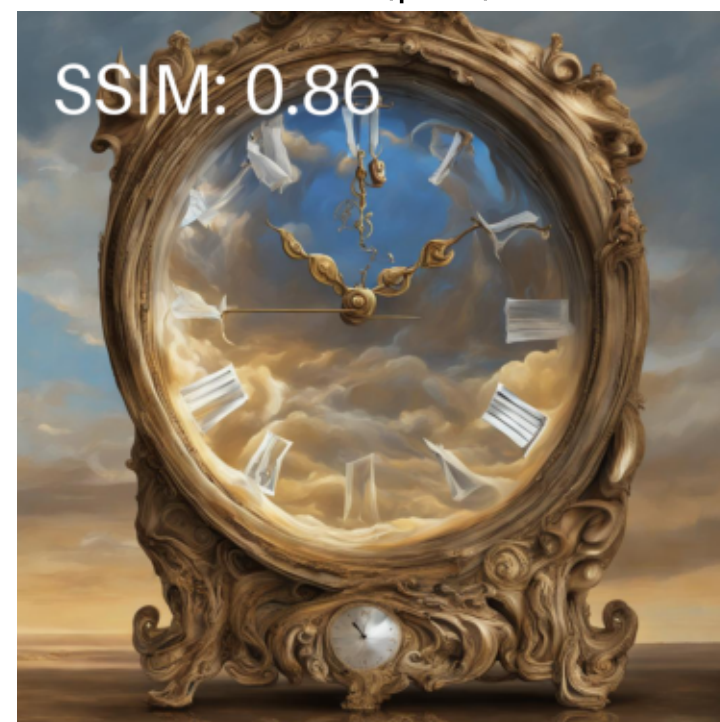

Step 40

SSIM: 1.00

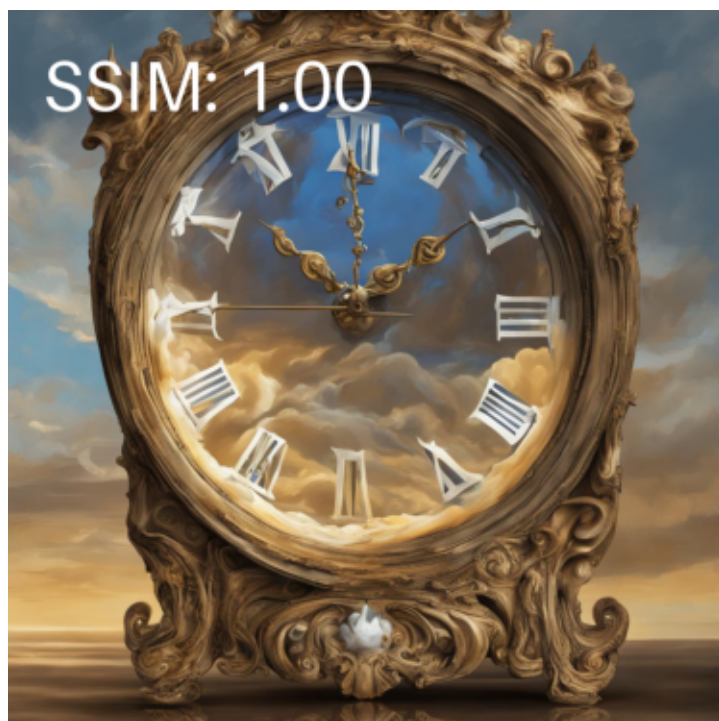

SSIM: 0.61

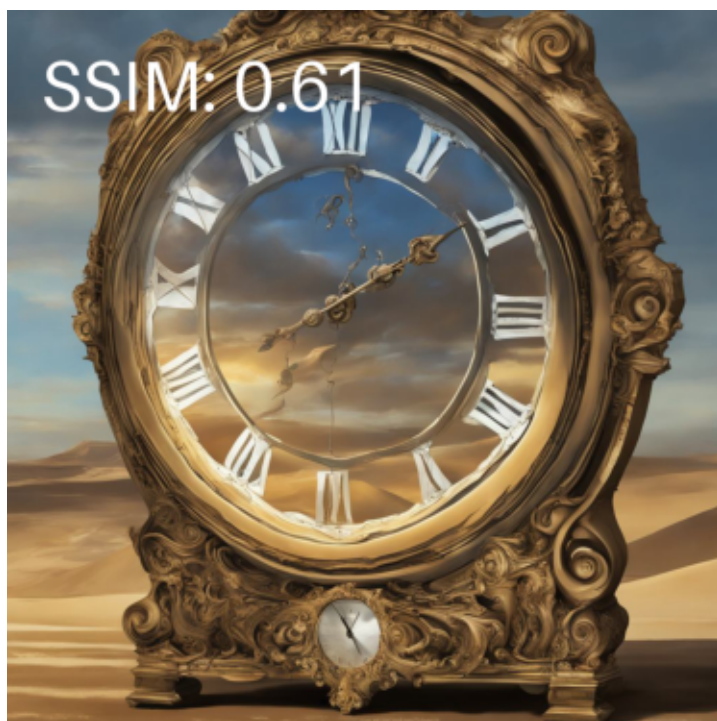

SSIM: 0.67

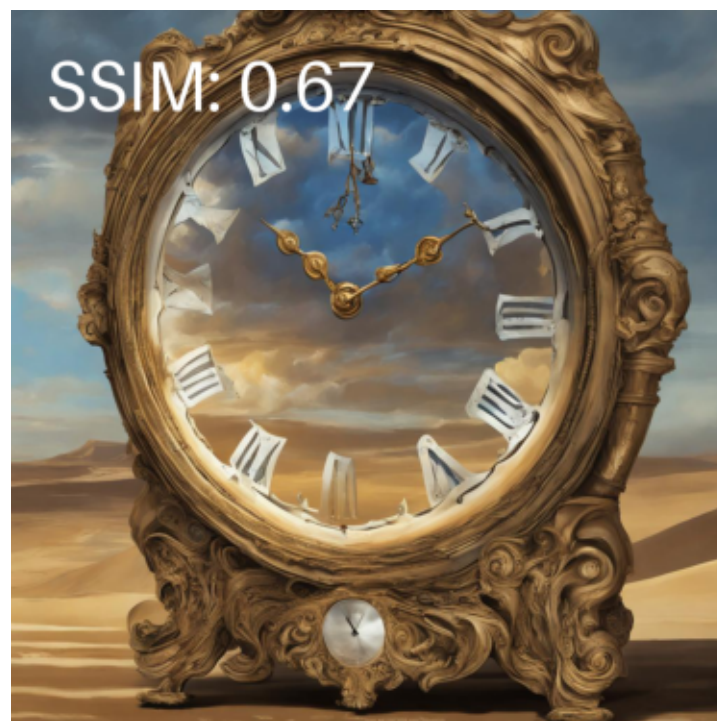

SSIM: 0.86

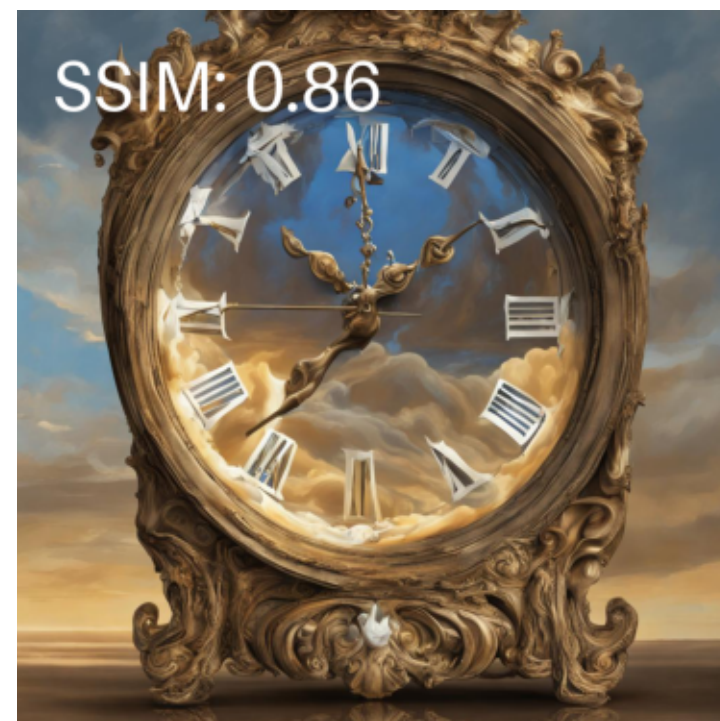

Step 100

SSIM: 1.00

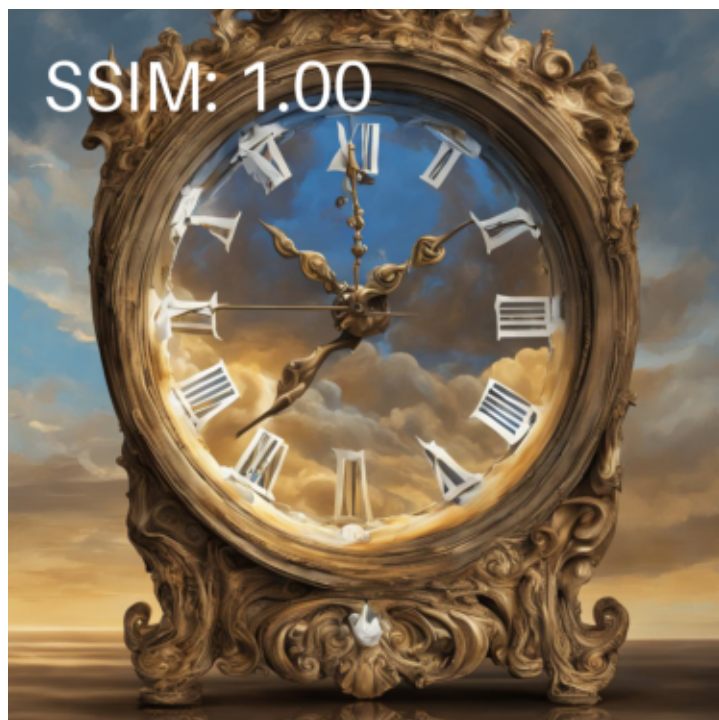

SSIM: 0.59

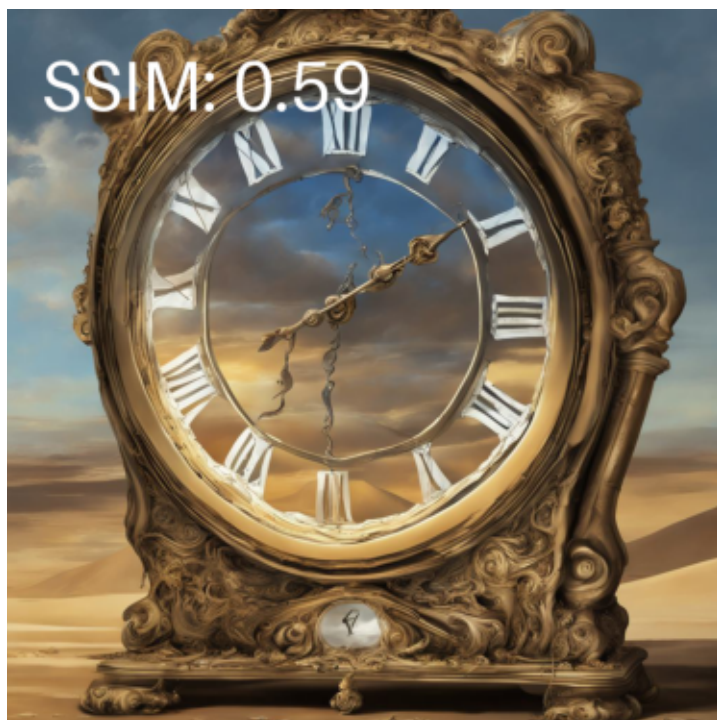

SSIM: 0.64

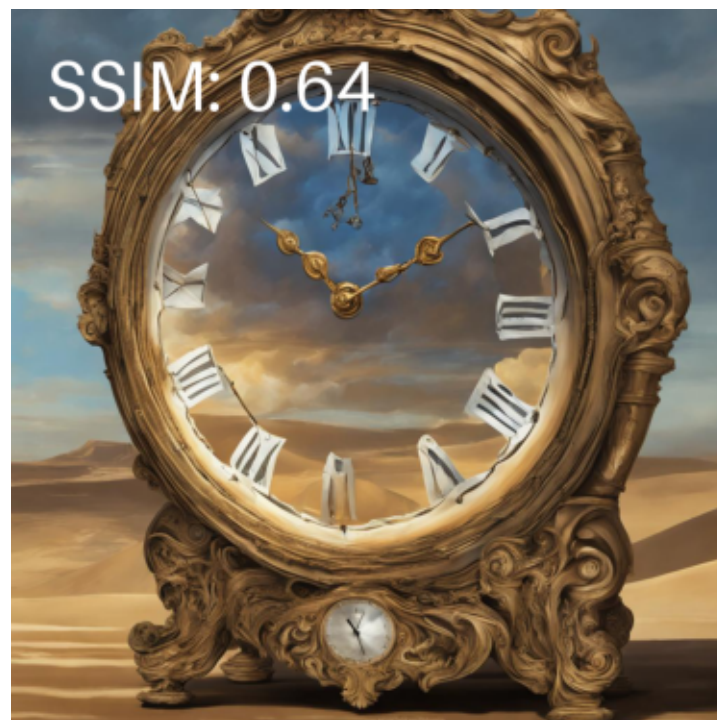

SSIM: 0.85

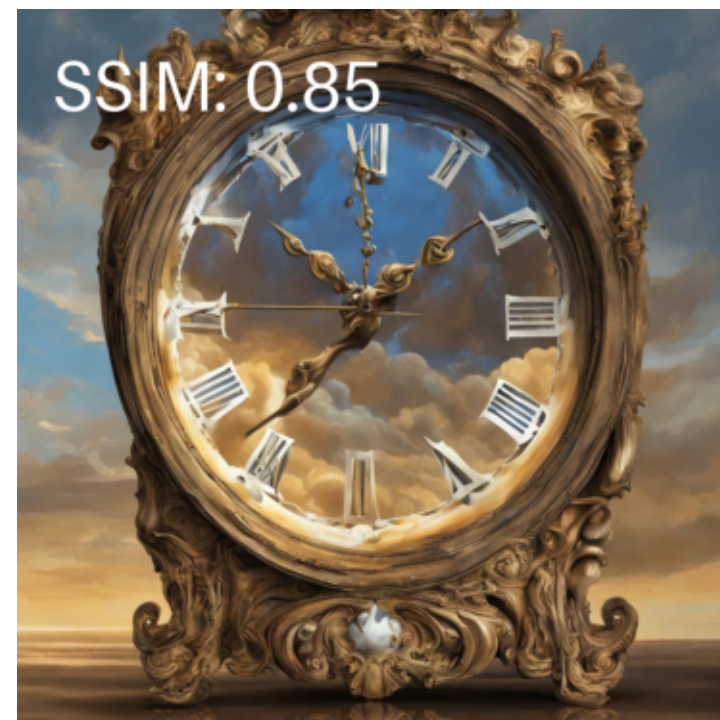

Step 200



modern city, Parisian buildings, billboards, advertisements, small buildings, dark, matte painting, concept art, digital painting, style of Ian Hubert, warm lighting, futuristic, volumetric lighting, street view, daytime, godrays , high detail, no sky scrapers

FP32

M4E3

+SR

+WSR(p=4)

Step 40

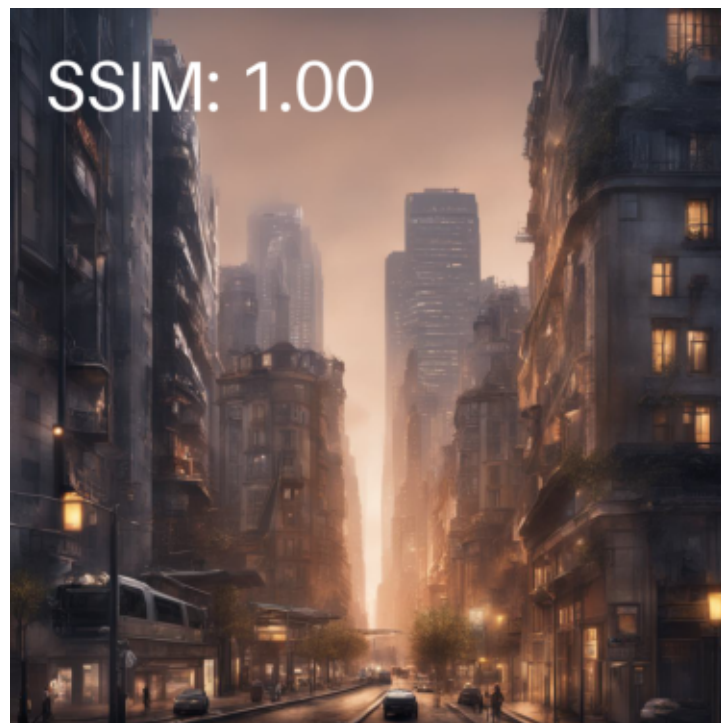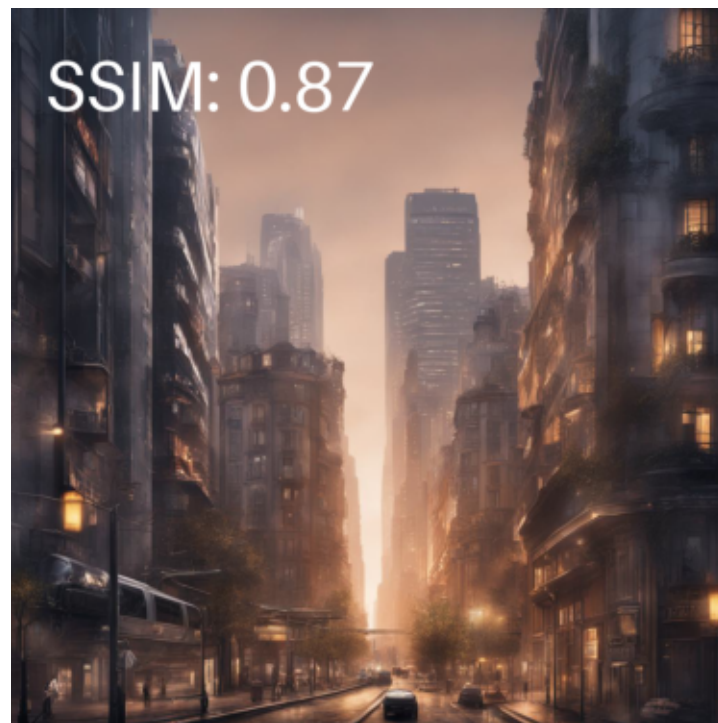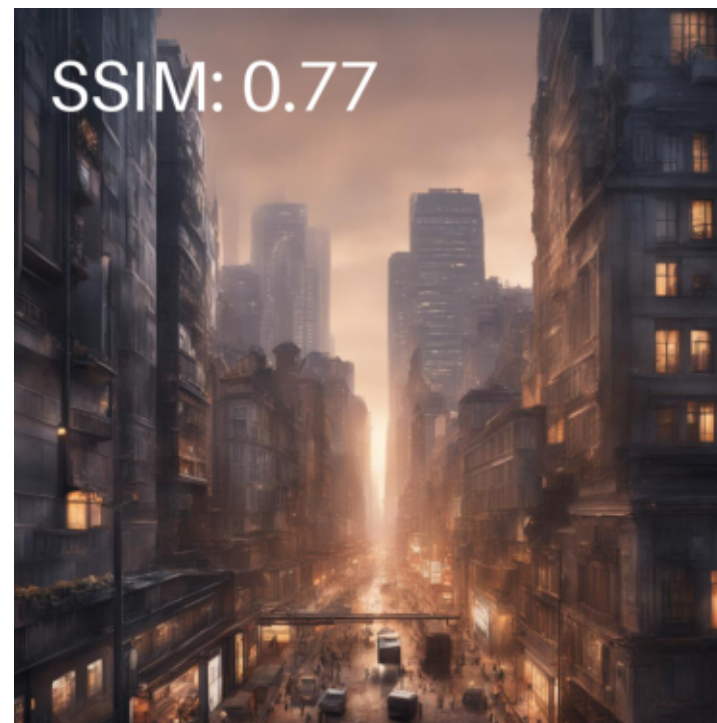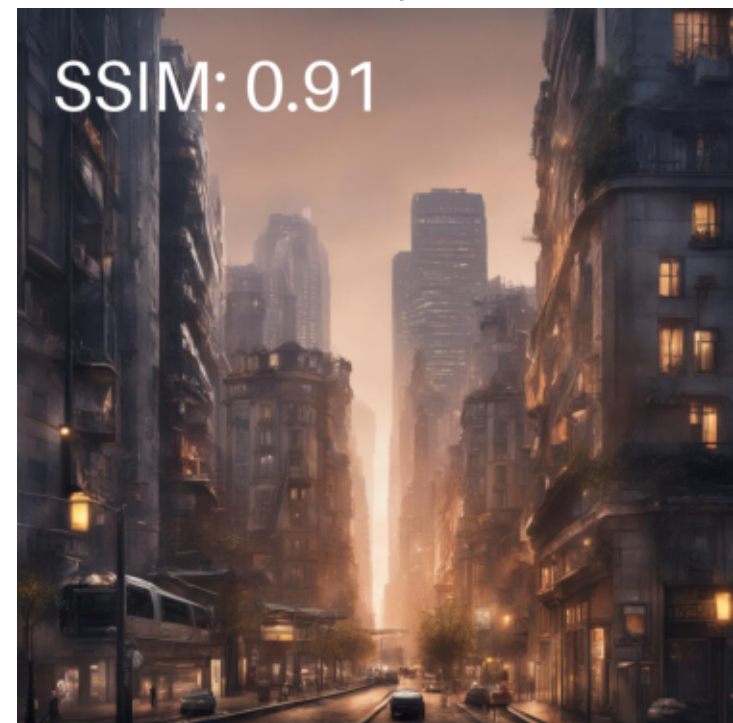

Step 100

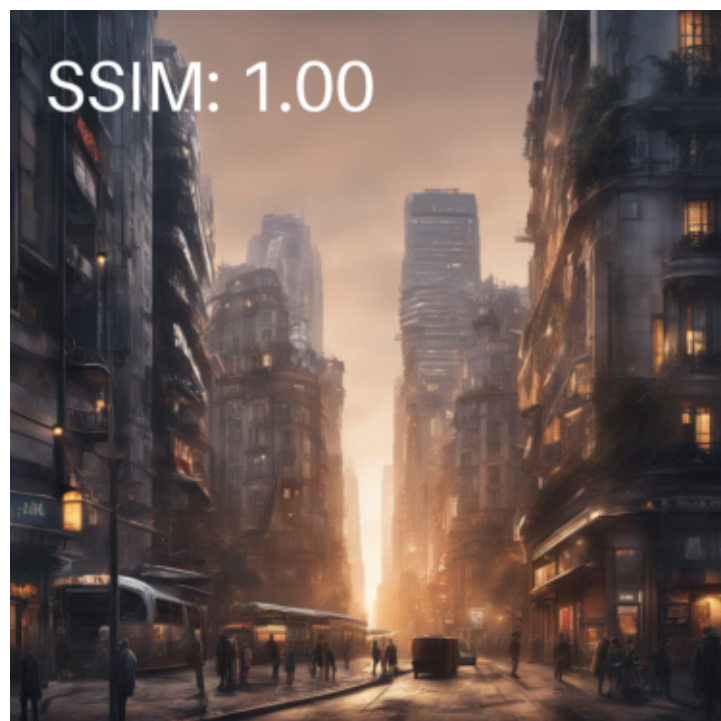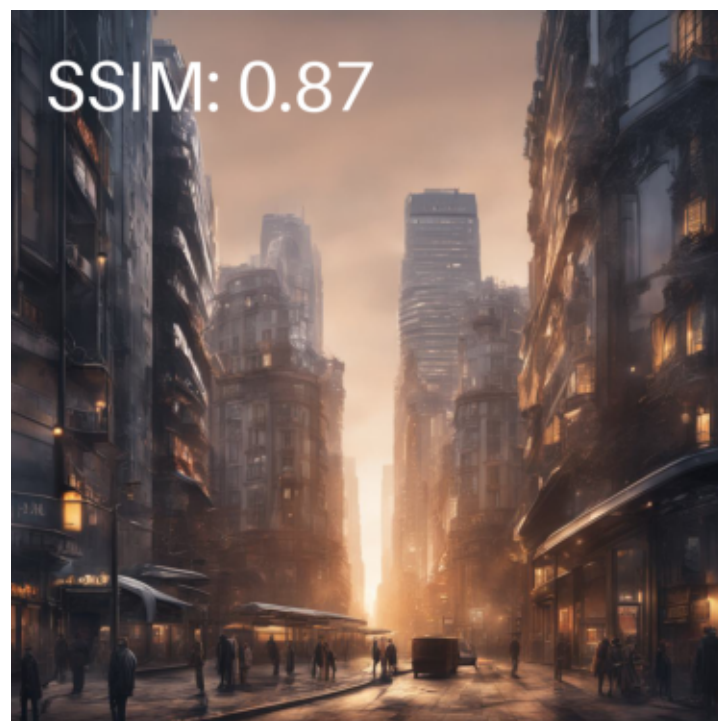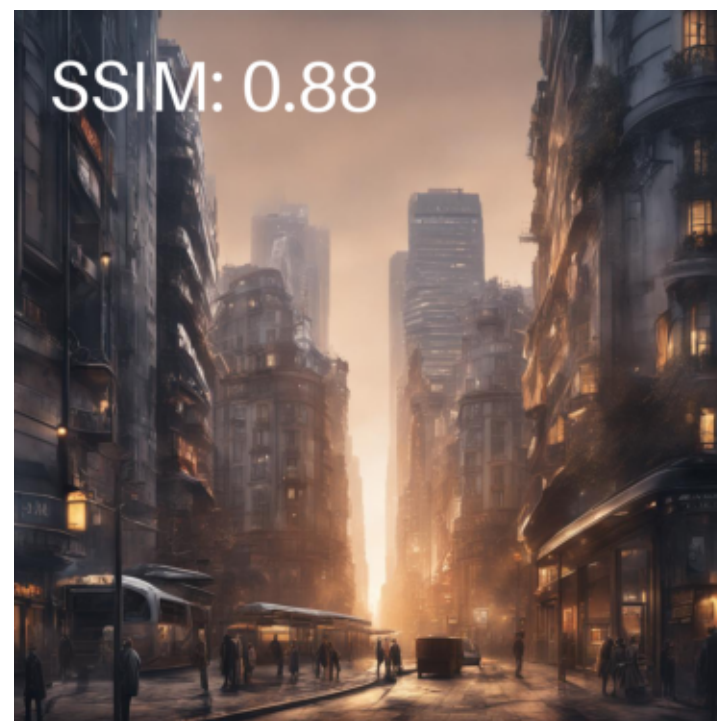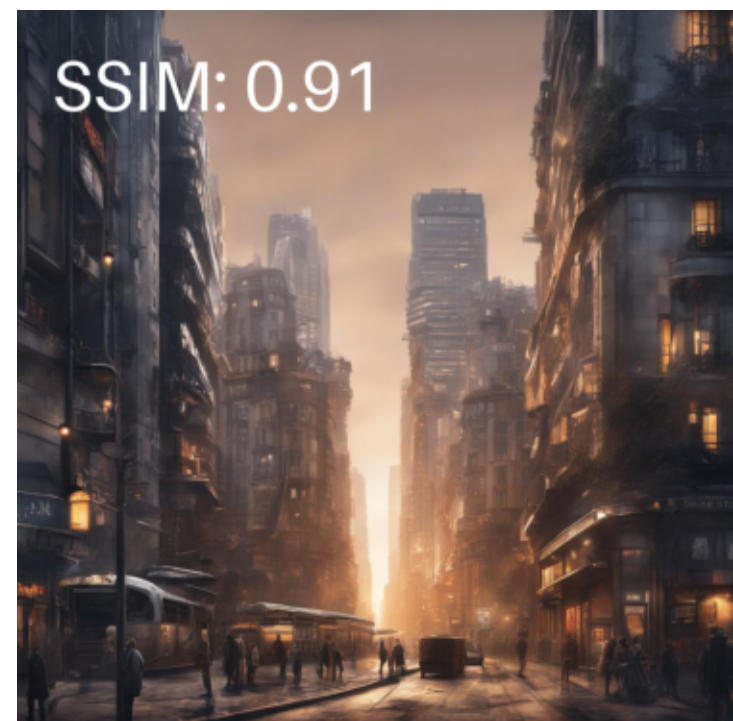

Step 200

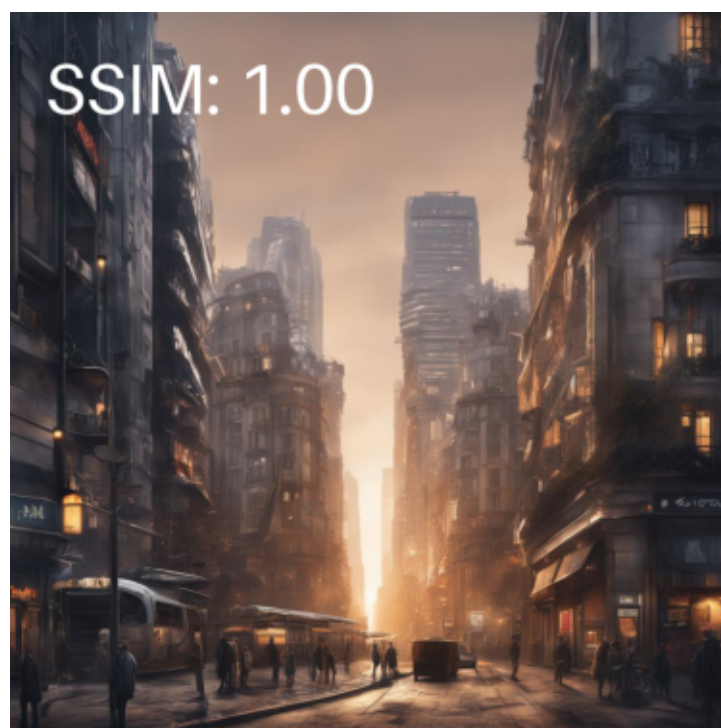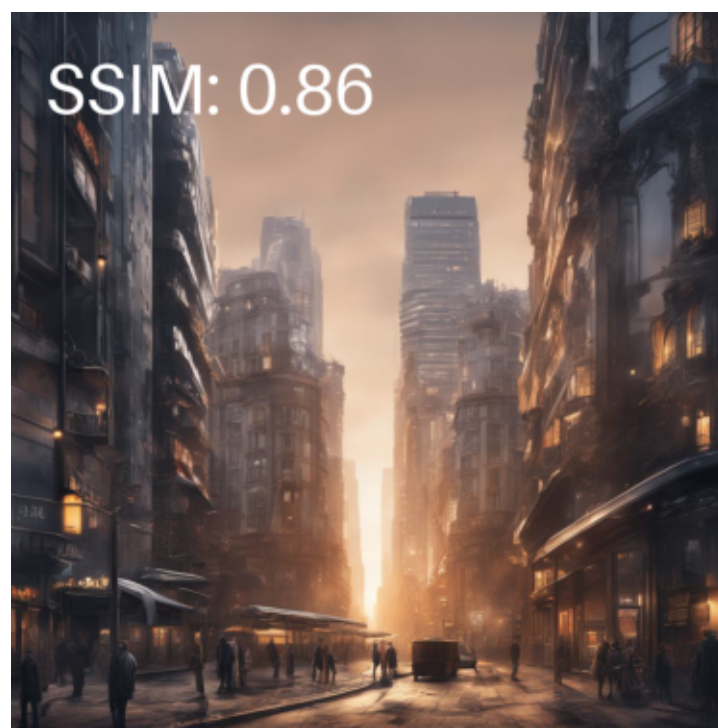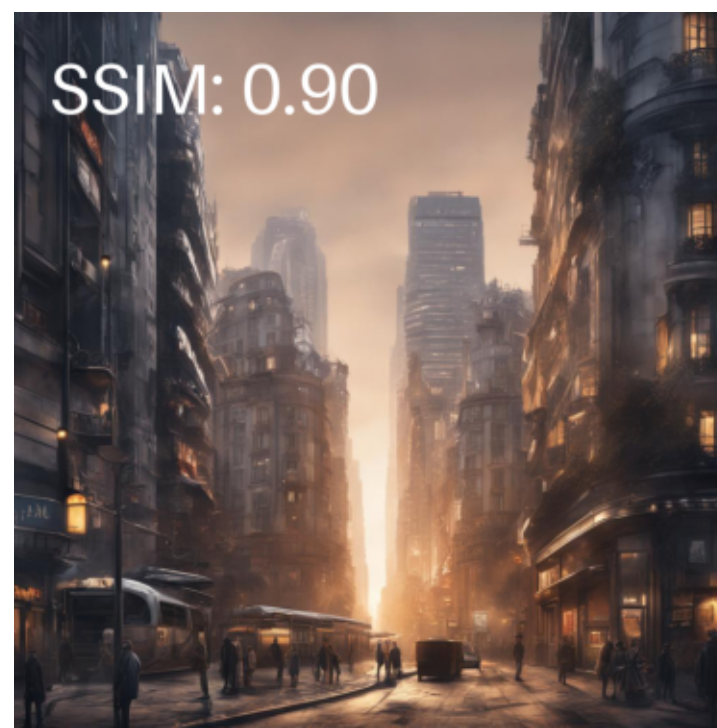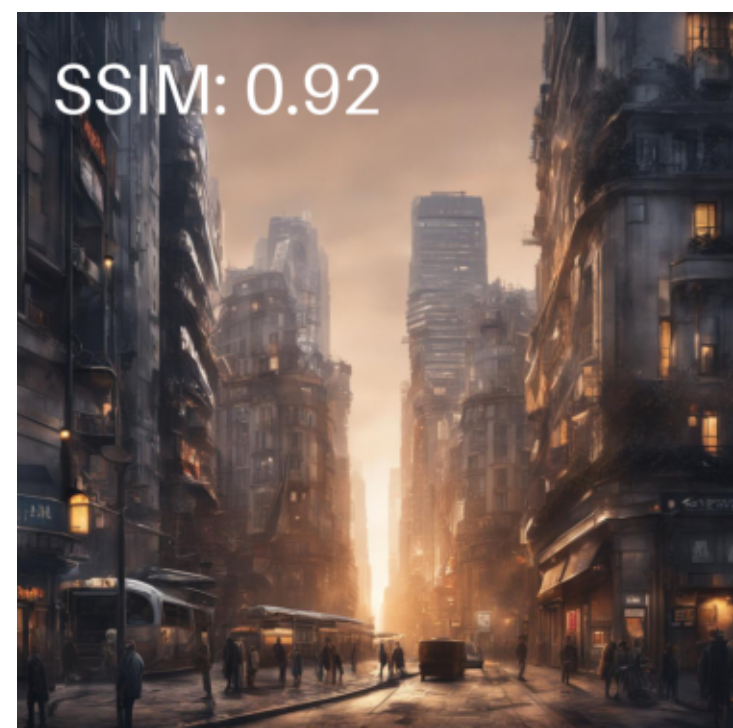



a portrait of an anthropomorphic donkey holding a martini, cyberpunk!, fantasy, elegant, digital painting, artstation, concept art, matte, sharp focus, illustration, art by josan gonzalez

Step 40

FP32

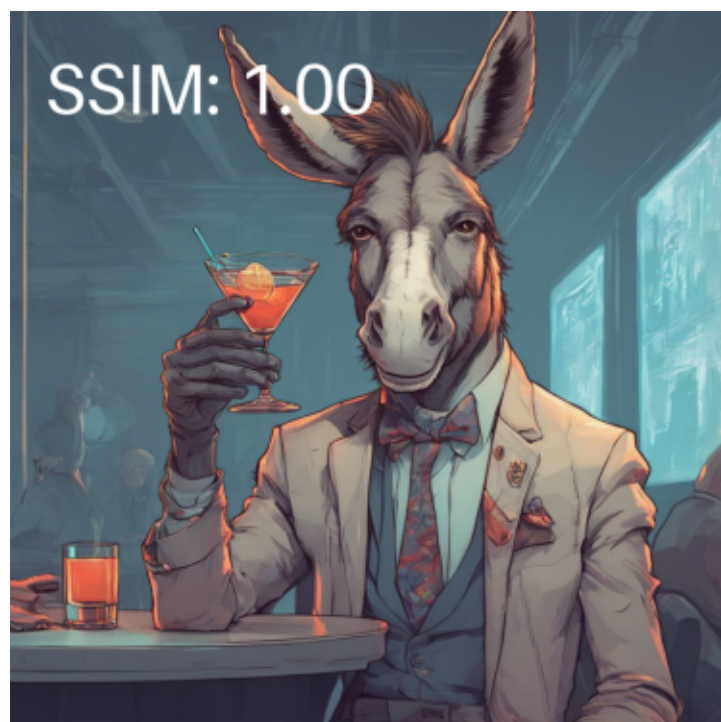

M4E3

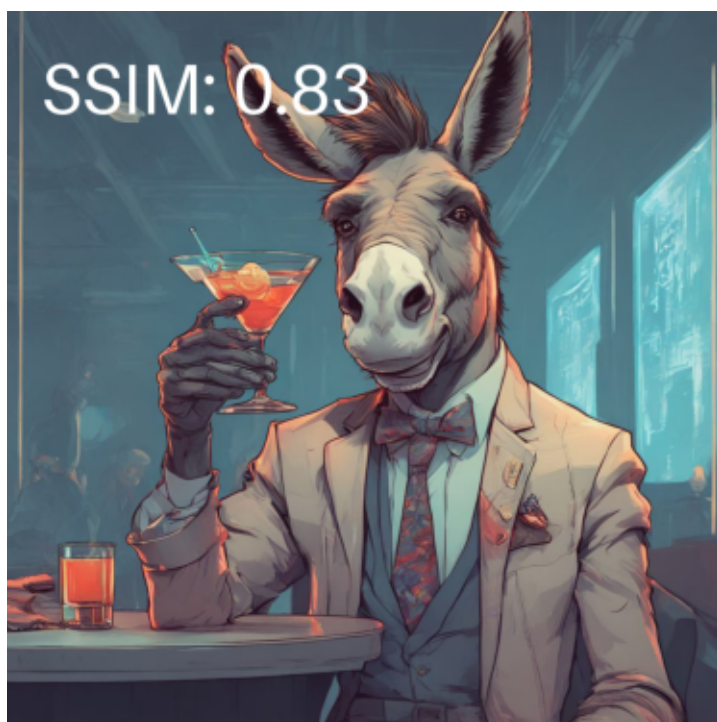

+SR

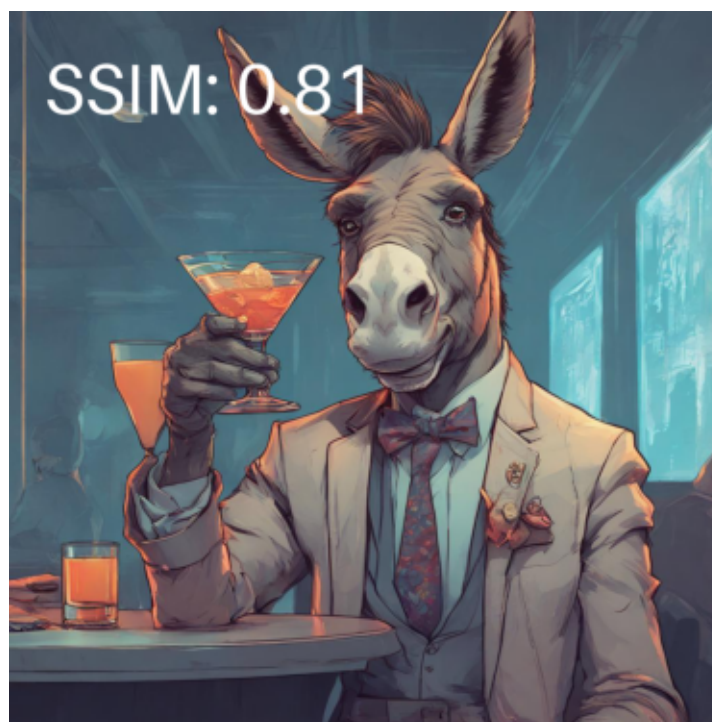

+WSR(p=4)

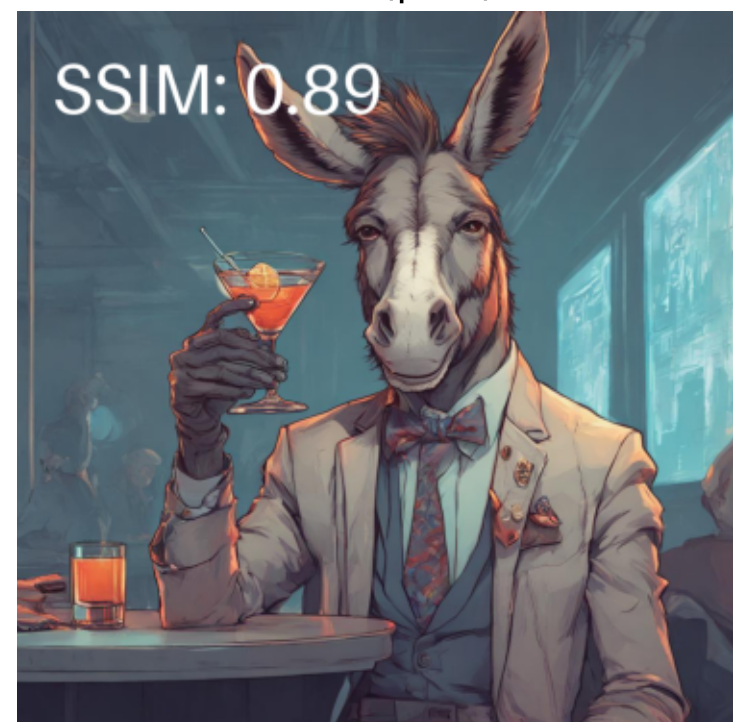

Step 100

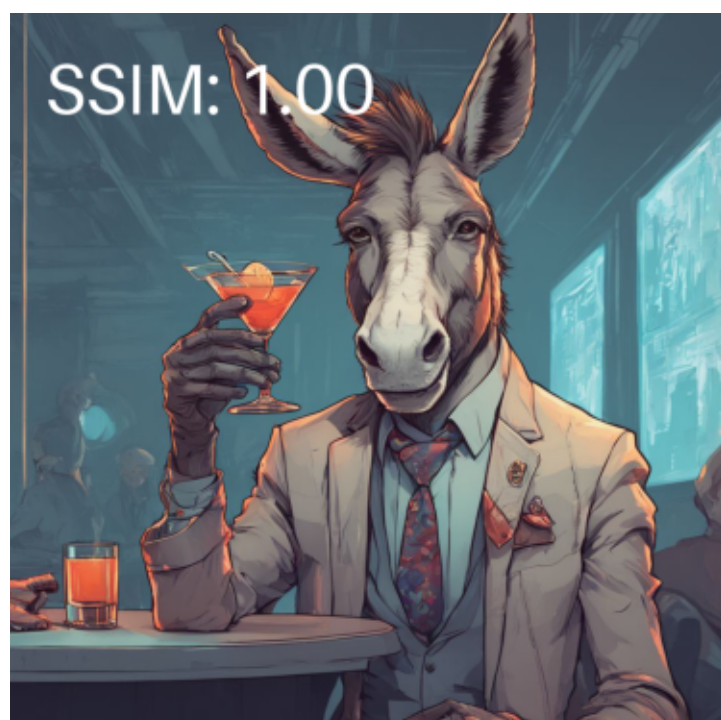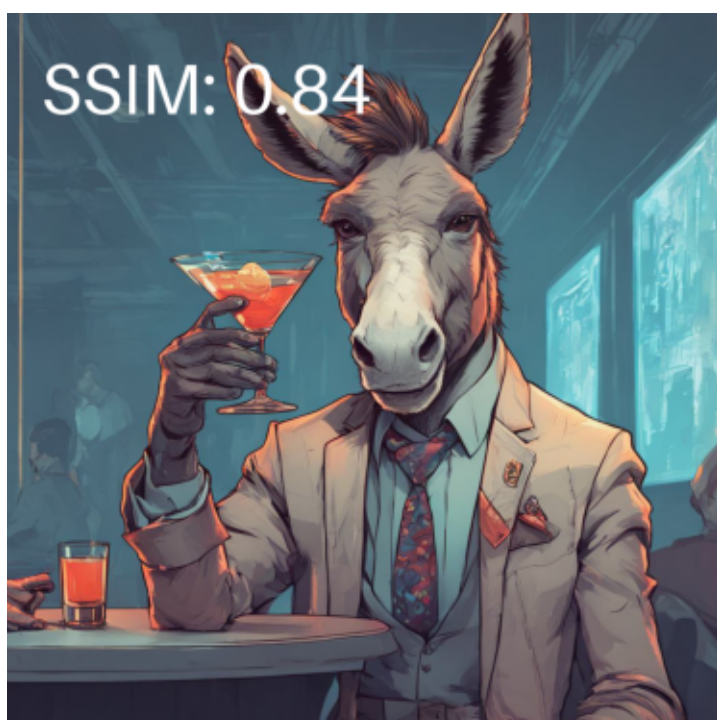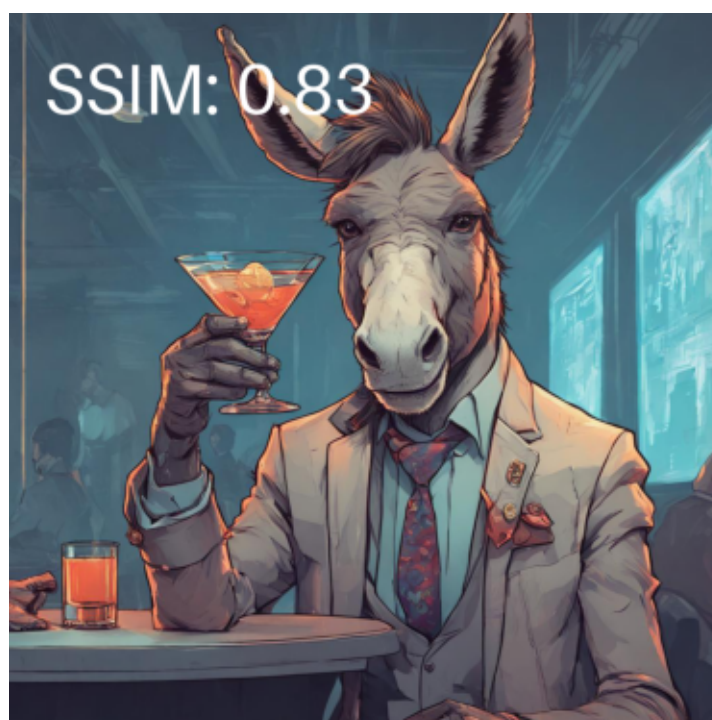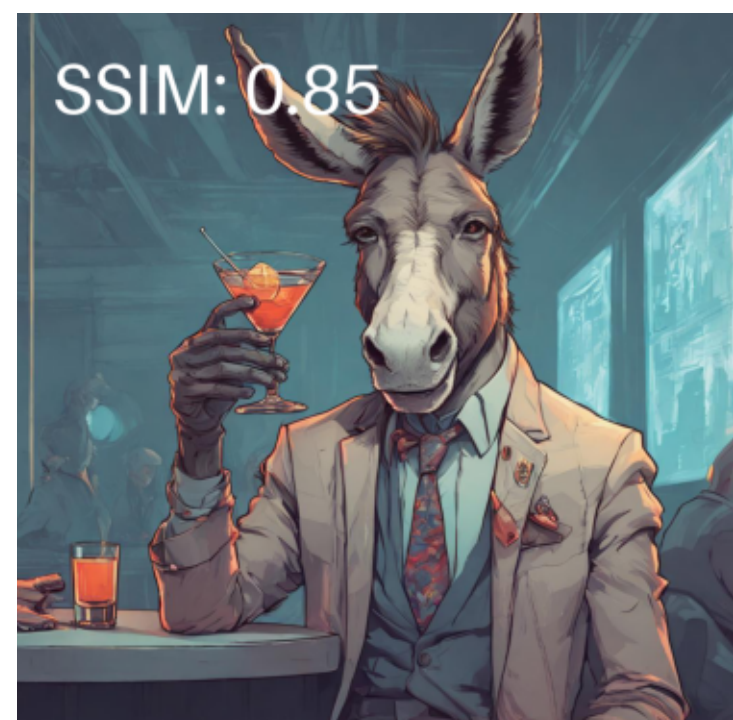

Step 200

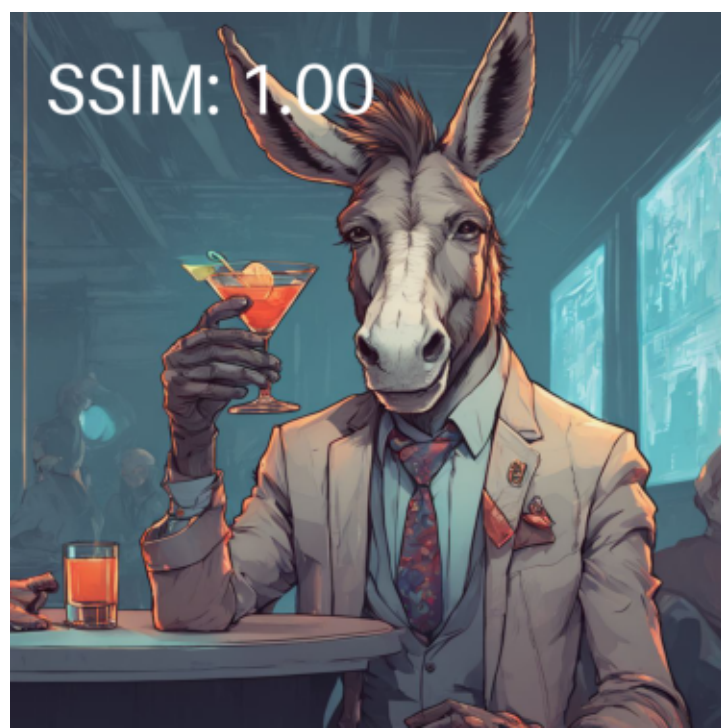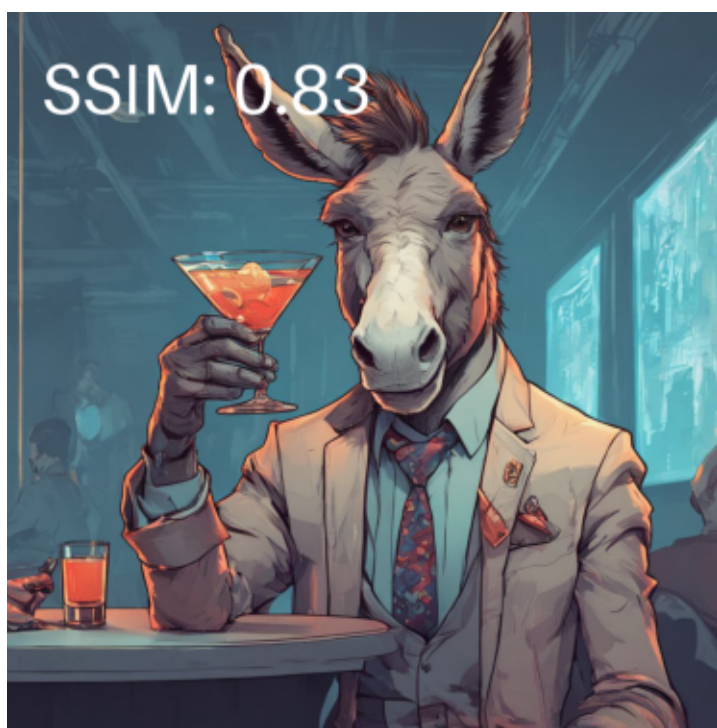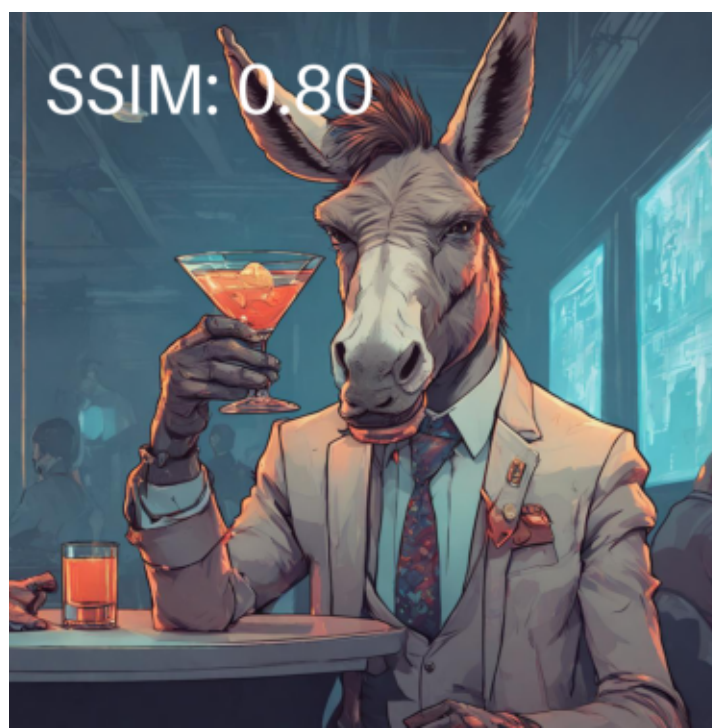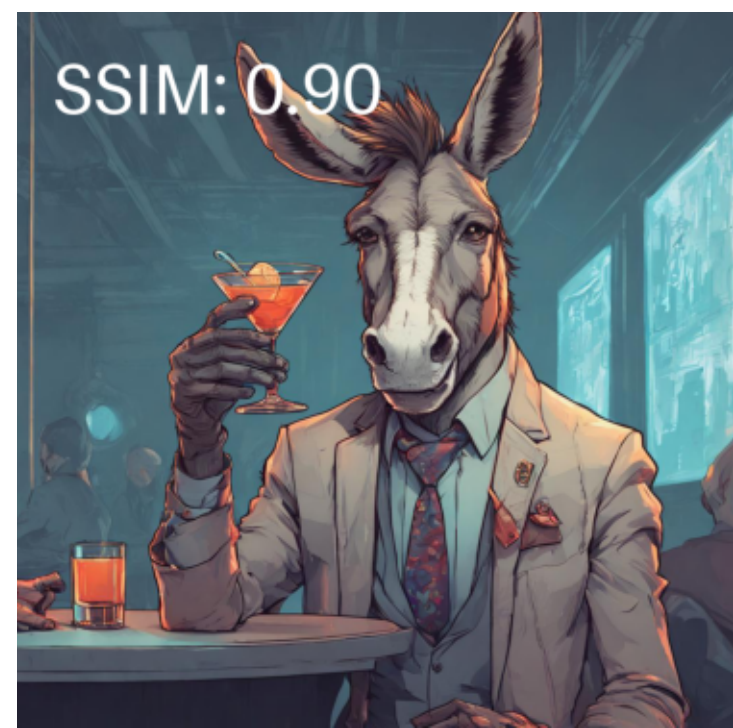



realistic render portrait realistic render portrait of group of flying blue whales towards the moon, intricate, toy, sci - fi, extremely detailed, digital painting, sculpted in zbrush, artstation, concept art, smooth, sharp focus, illustration, chiaroscuro lighting, golden ratio, incredible art by artgerm and greg rutkowski and alphonse mucha and simon stalenhag

FP32

M4E3

+SR

+WSR(p=4)

Step 40

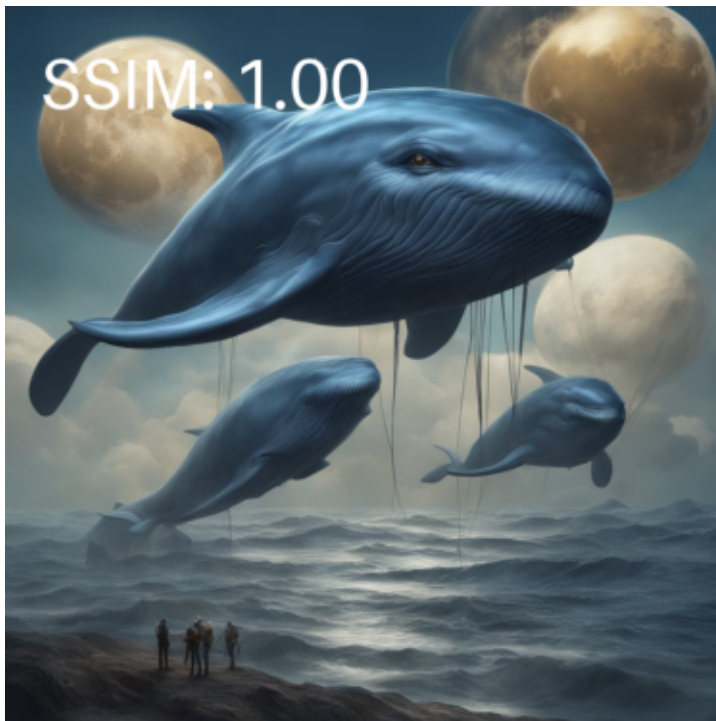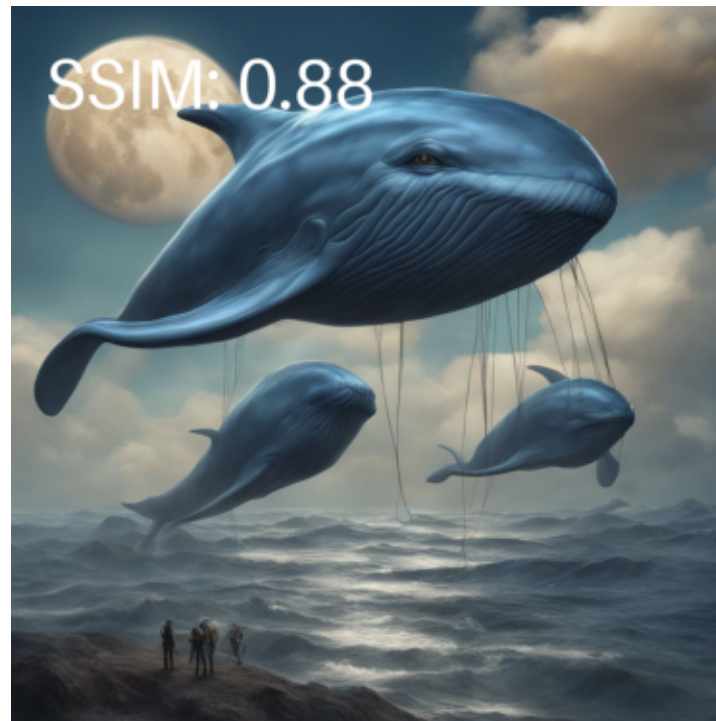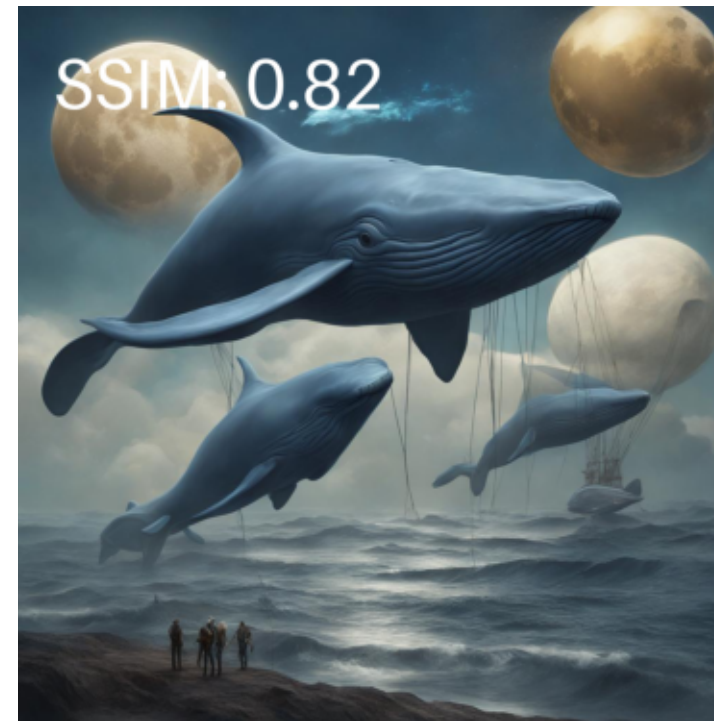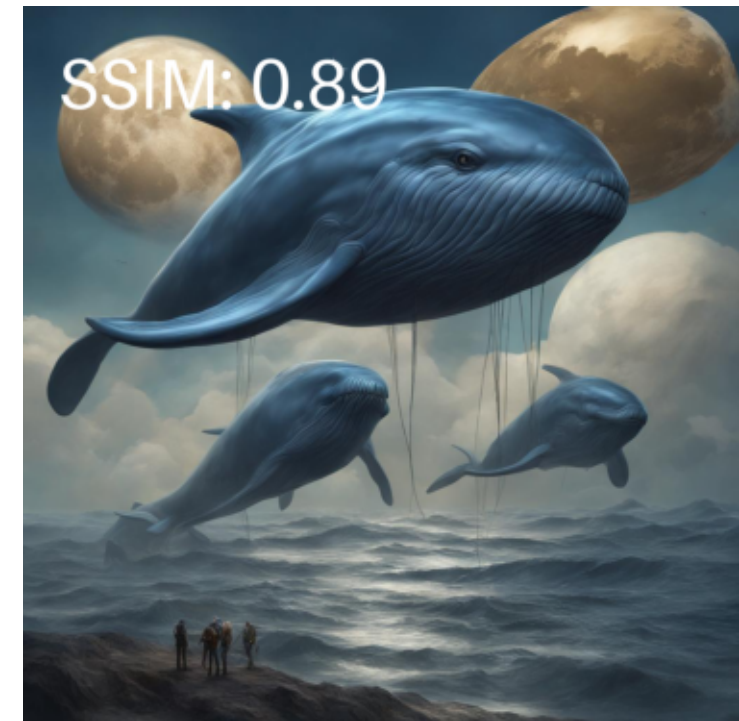

Step 100

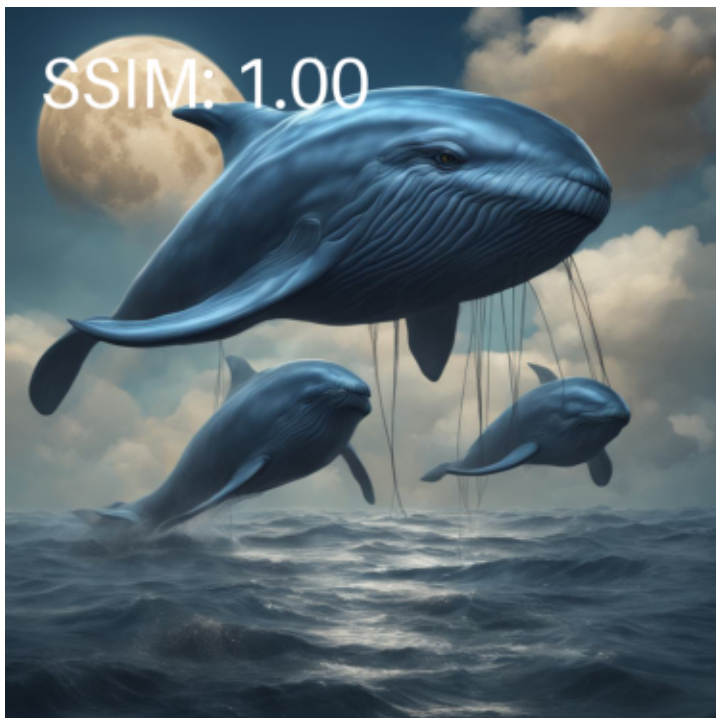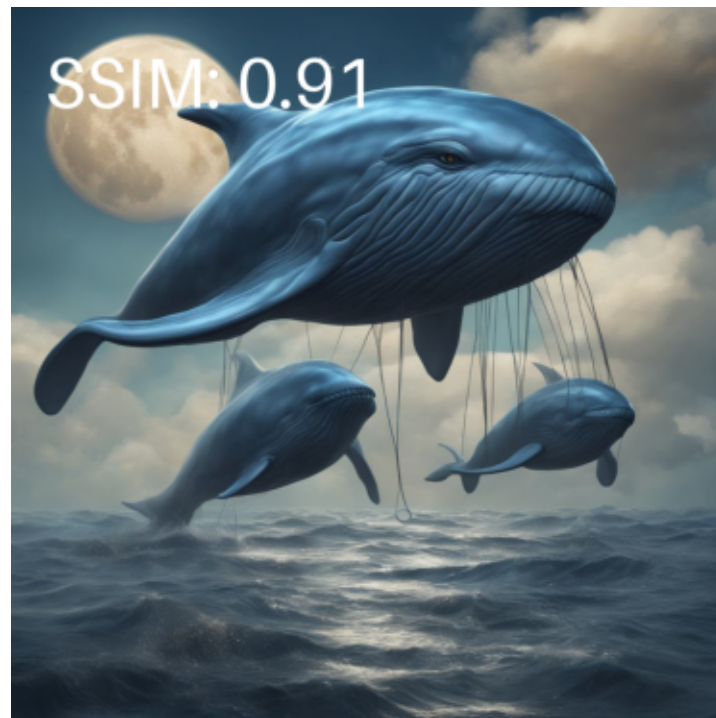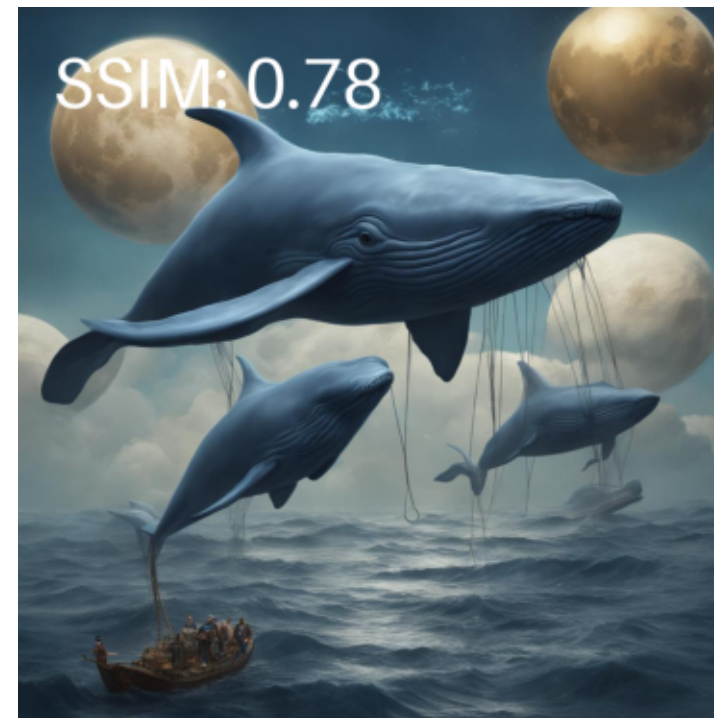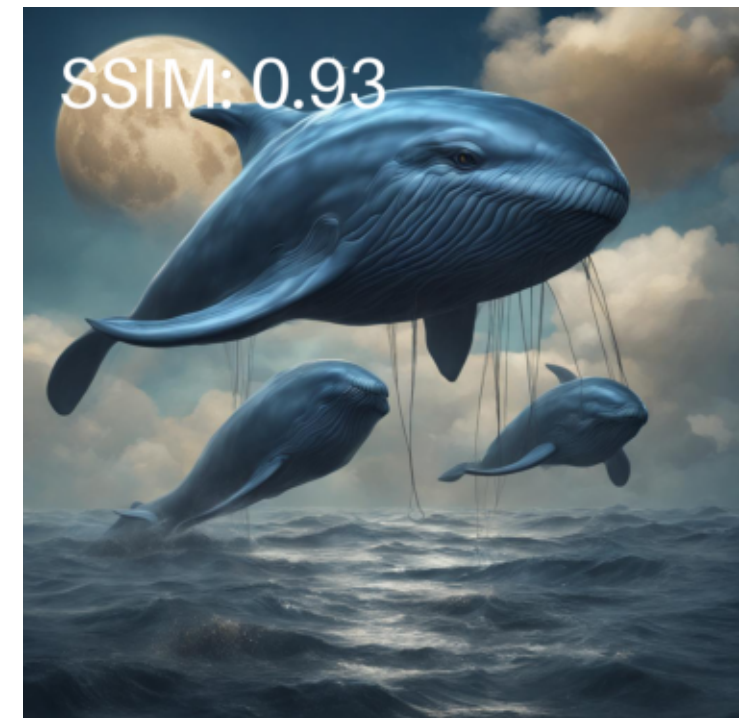

Step 200

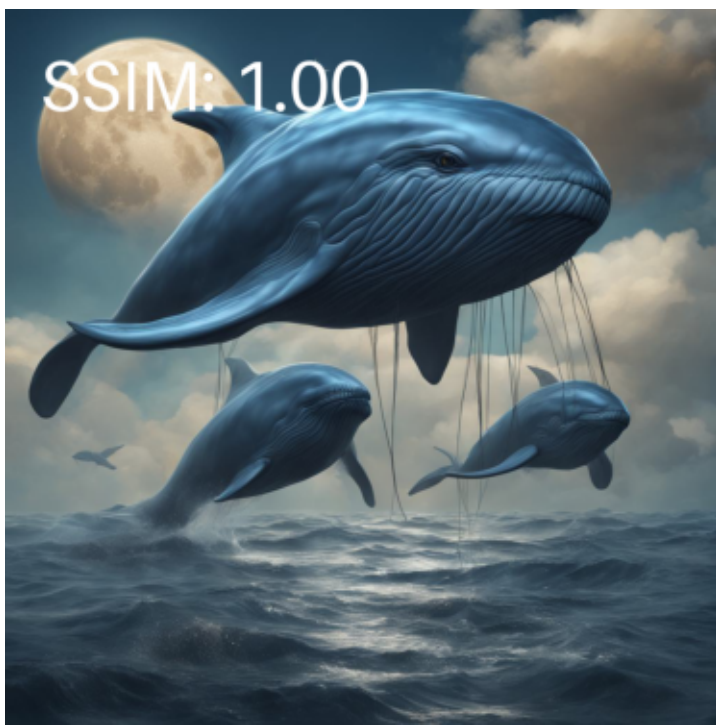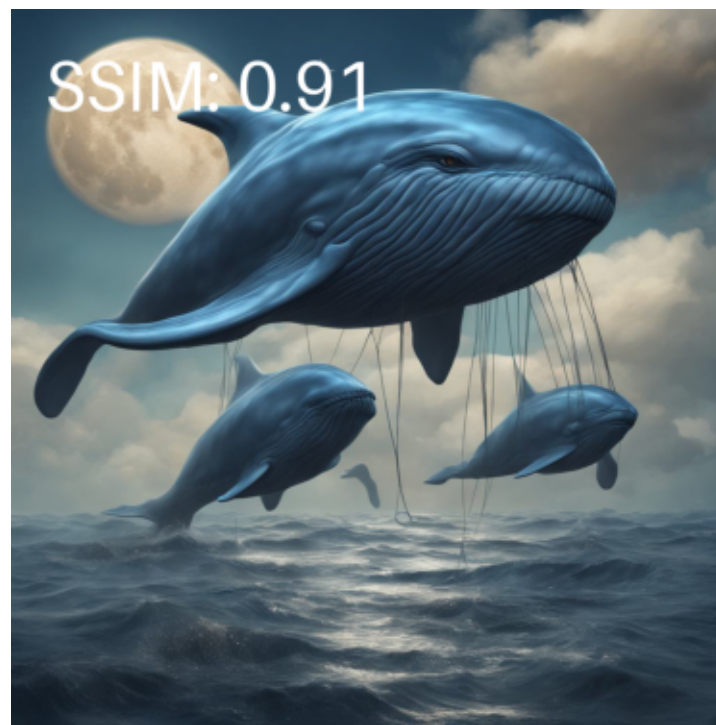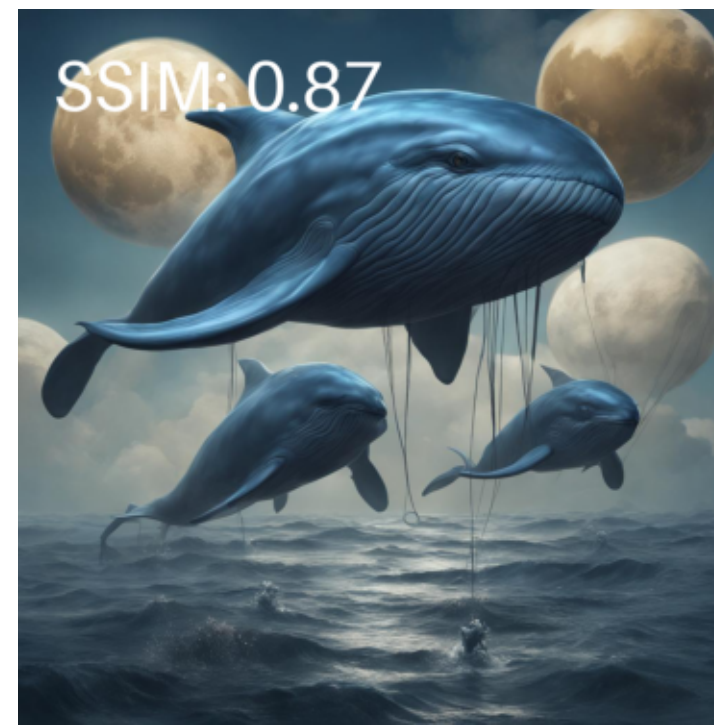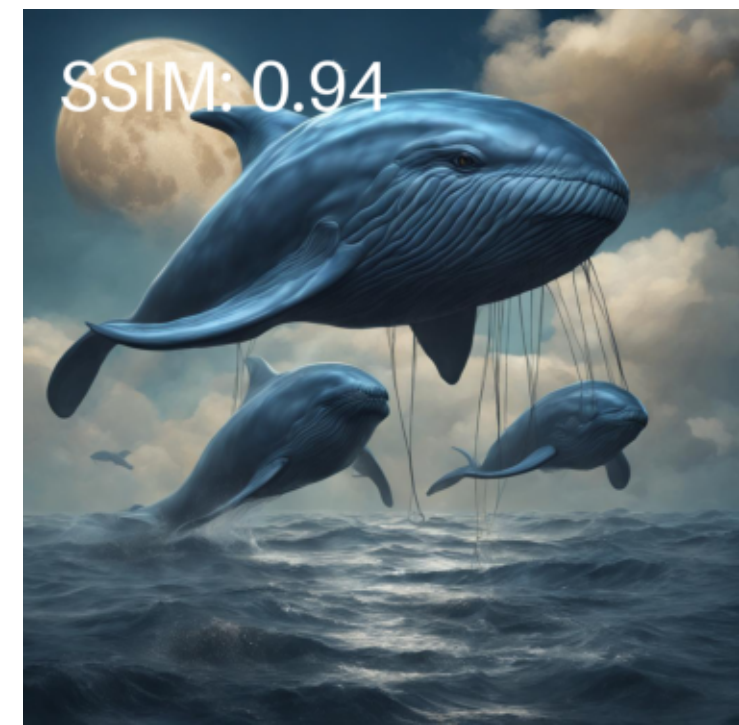



a fat ugly man, in the style of artgerm, gerald brom, atey ghailan and mike mignola, vibrant colors and hard shadows and strong rim light, plain background, comic cover art, trending on artstation

FP32

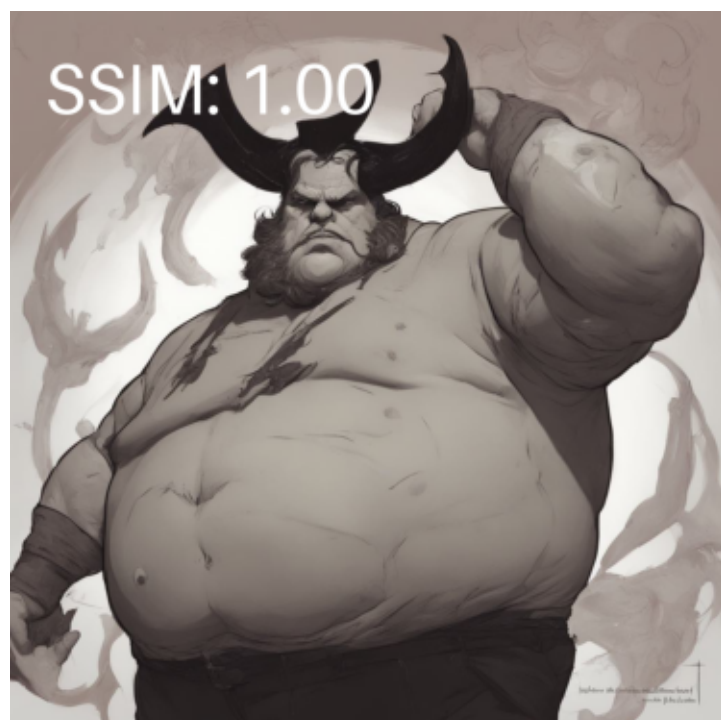

M4E3

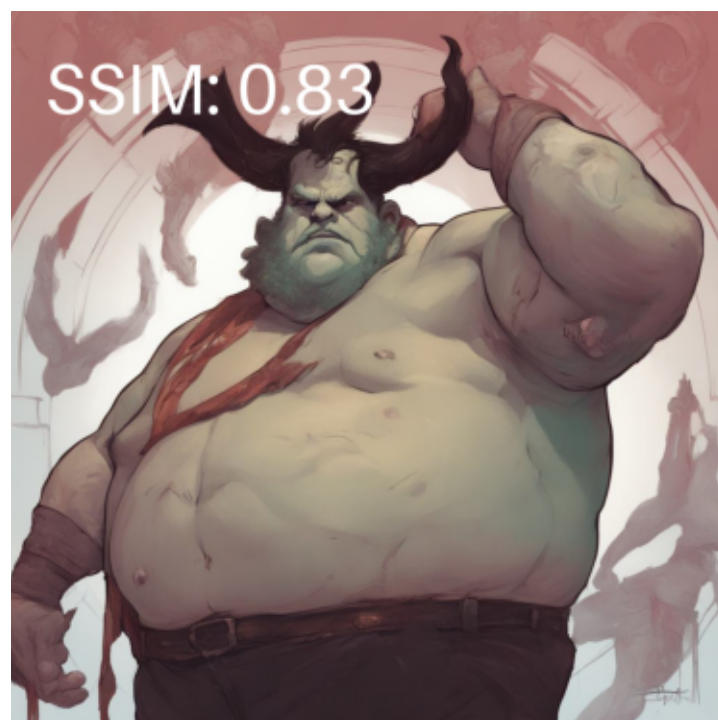

+SR

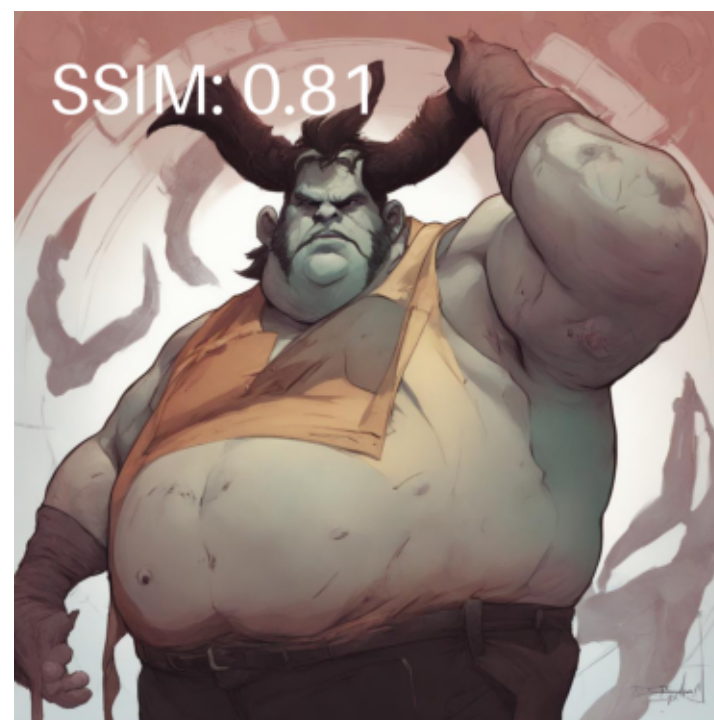

+WSR(p=4)

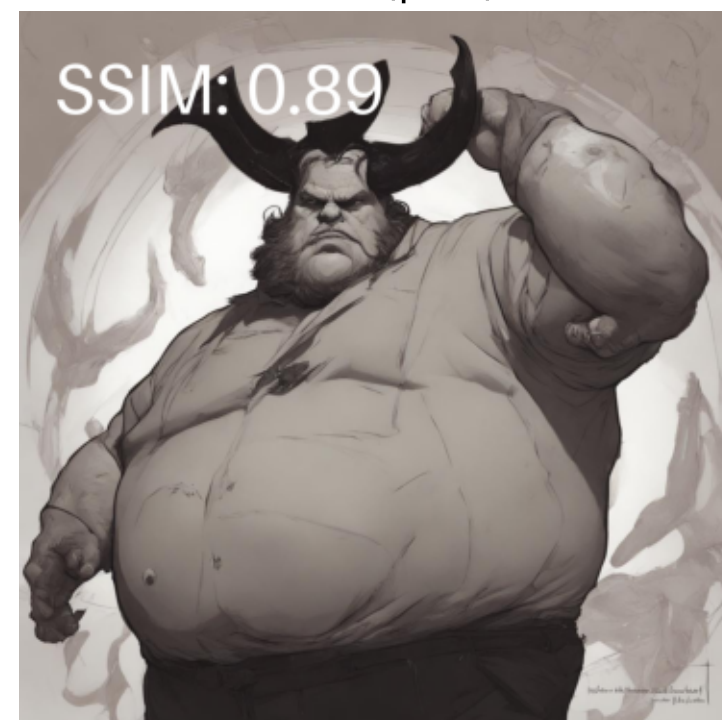

Step 40

SSIM: 1.00

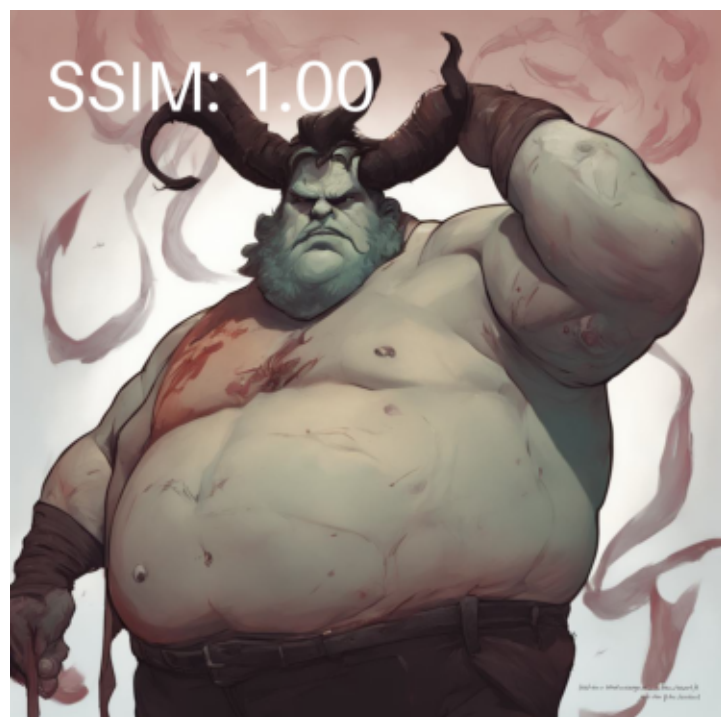

SSIM: 0.85

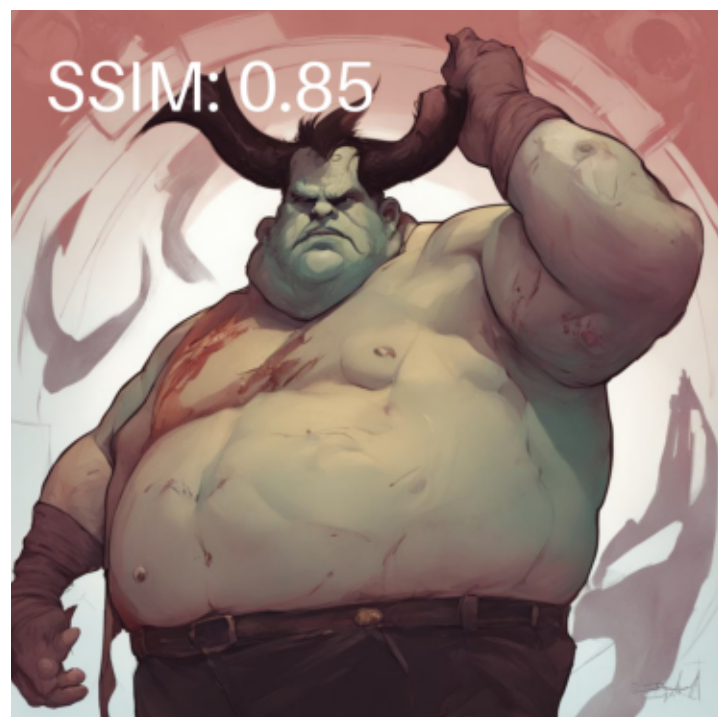

SSIM: 0.82

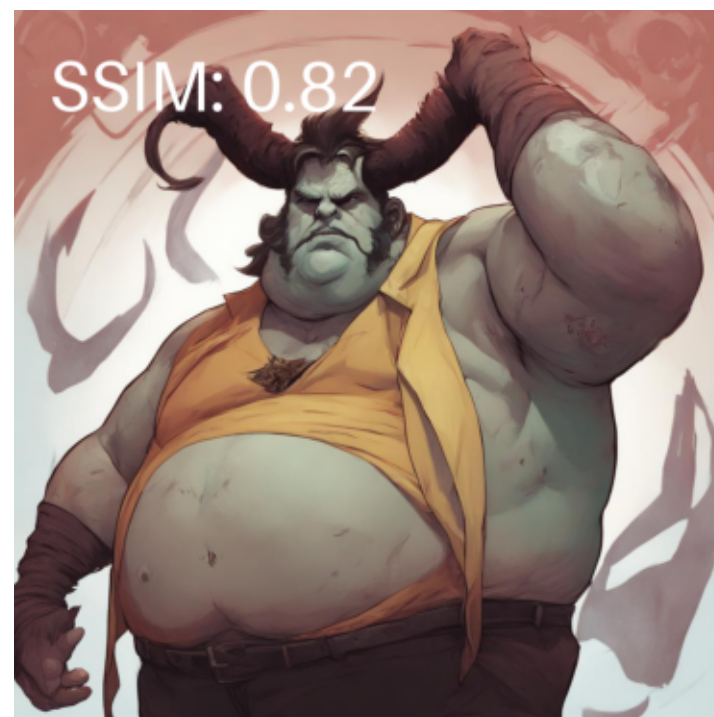

SSIM: 0.92

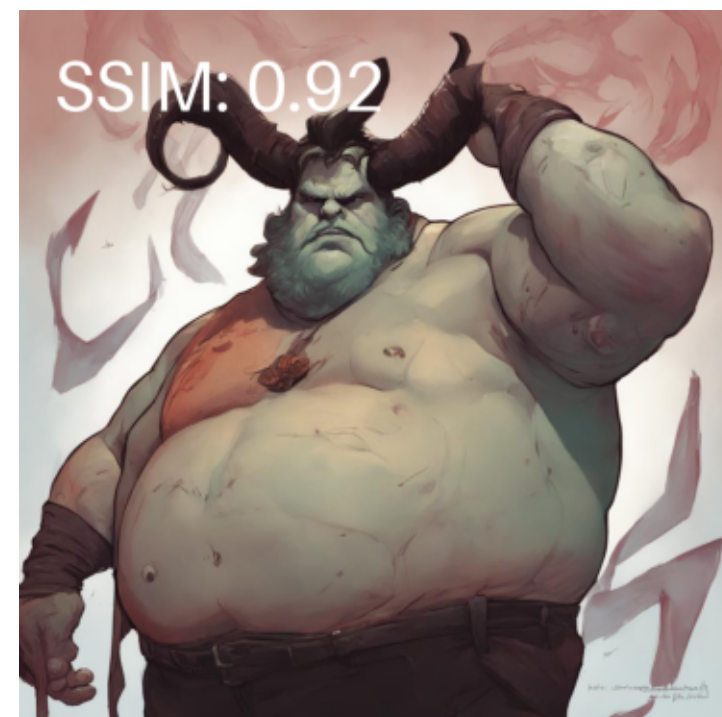

Step 100

SSIM: 1.00

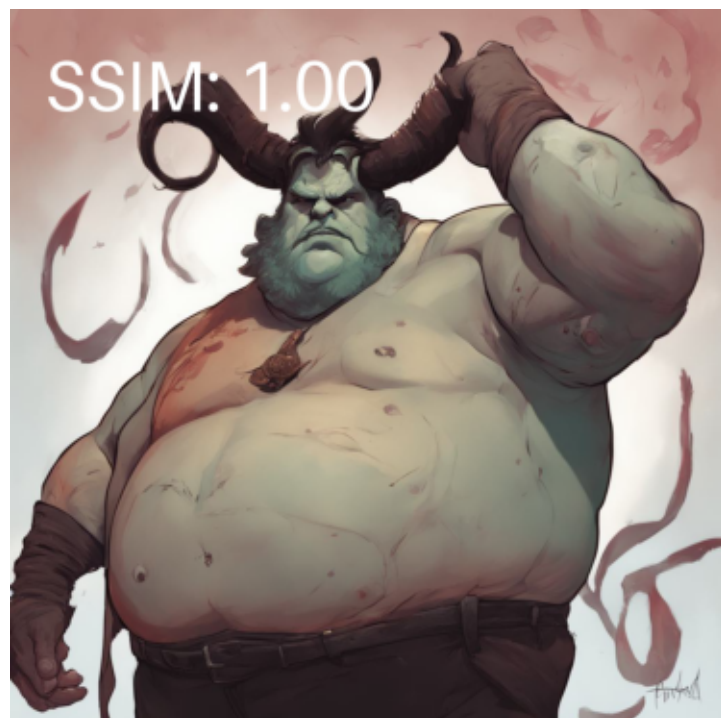

SSIM: 0.86

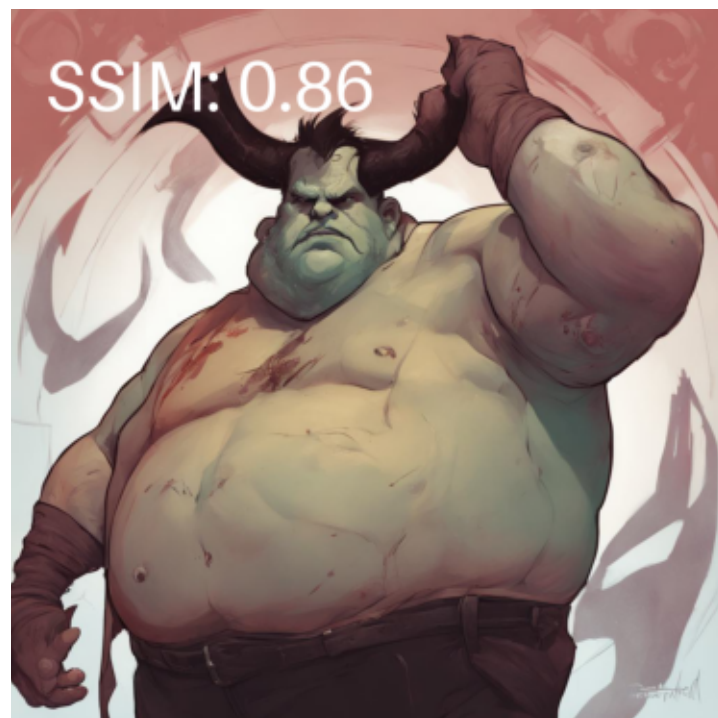

SSIM: 0.82

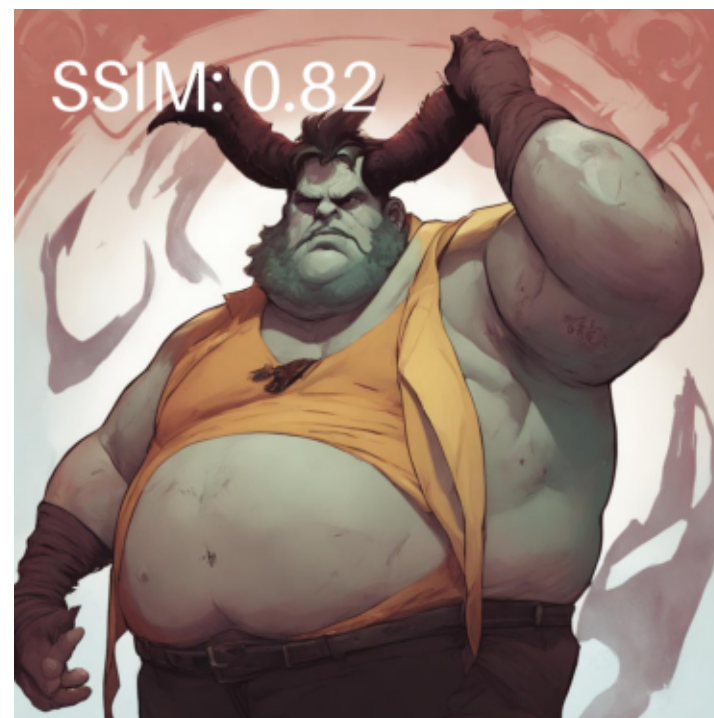

SSIM: 0.88

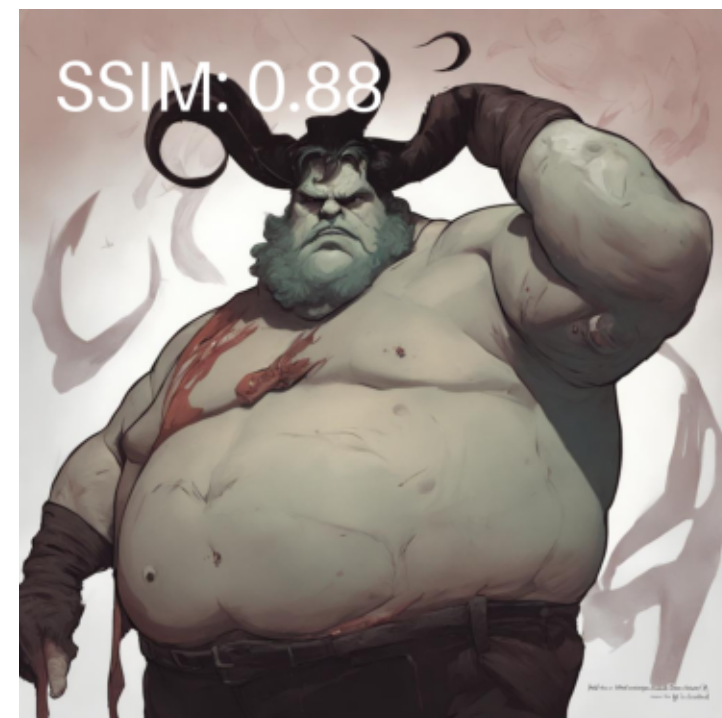

Step 200



a portrait of a beautiful willa holland as a 1 9 5 0 s rockabilly greaser, art by lois van baarle and loish and ross tran and rossdraws and sam yang and samdoesarts and artgerm, digital art, highly detailed, intricate, sharp focus, trending on artstation hq, deviantart, unreal engine 5, 4 k uhd image

Step 40

FP32

M4E3

+SR

+WSR(p=4)

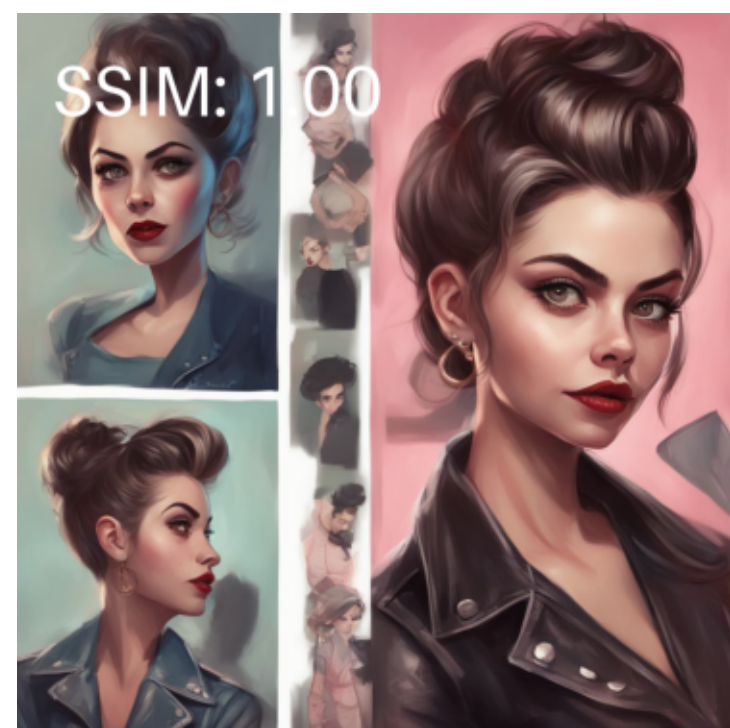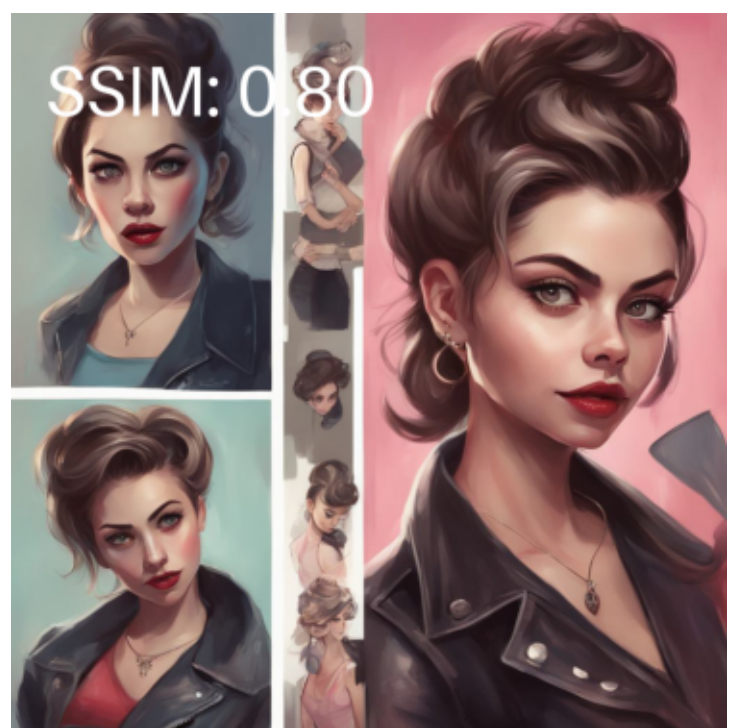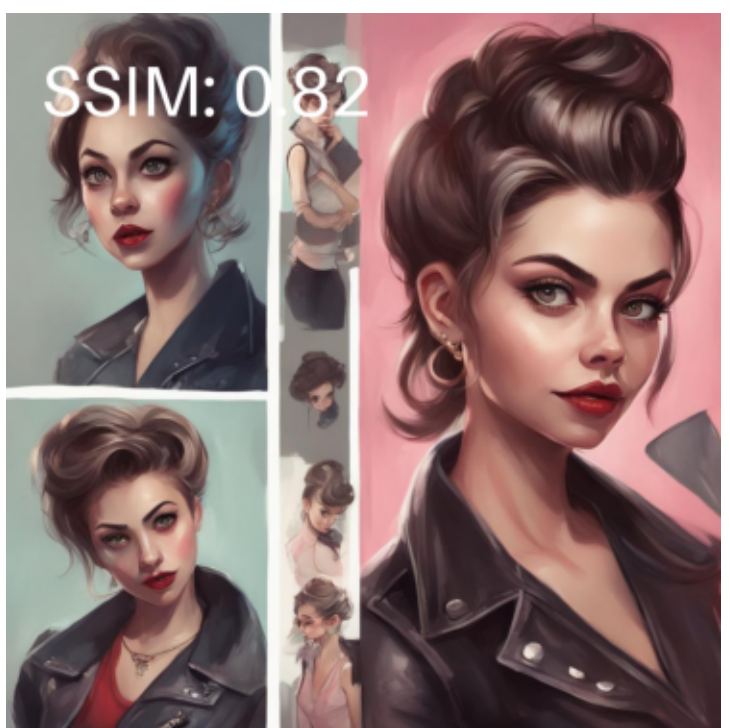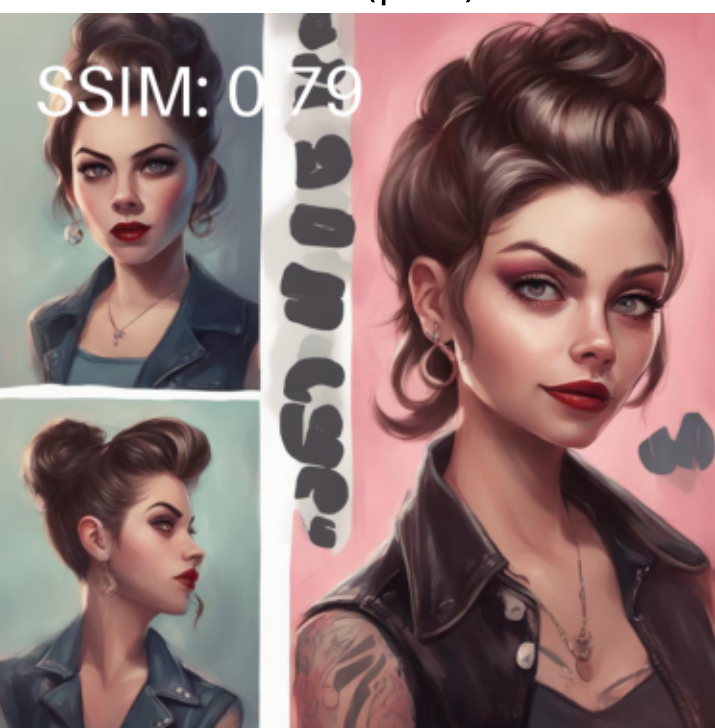

Step 100

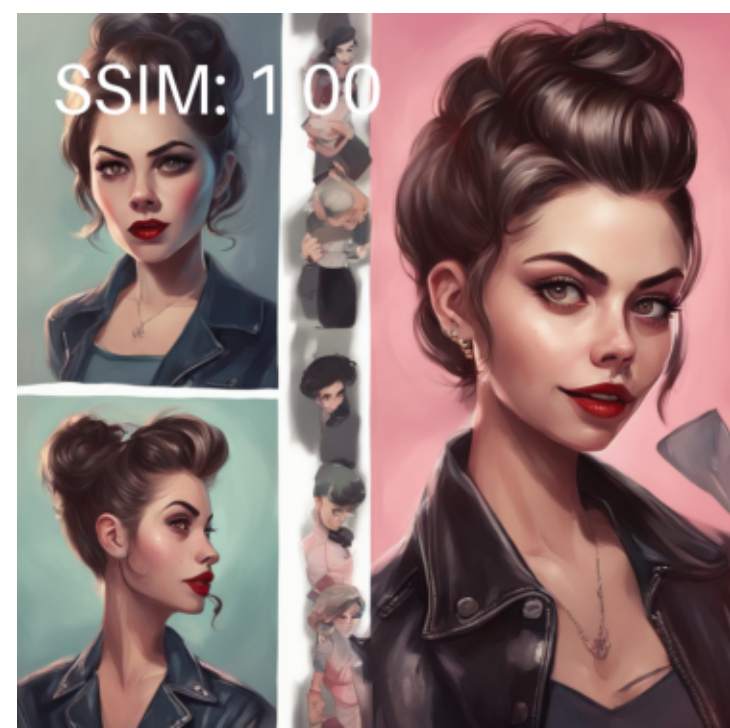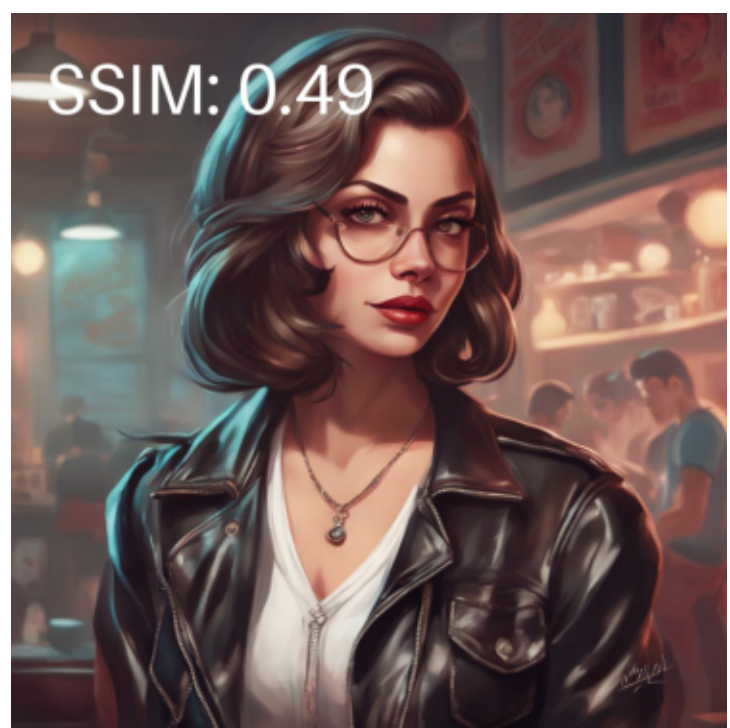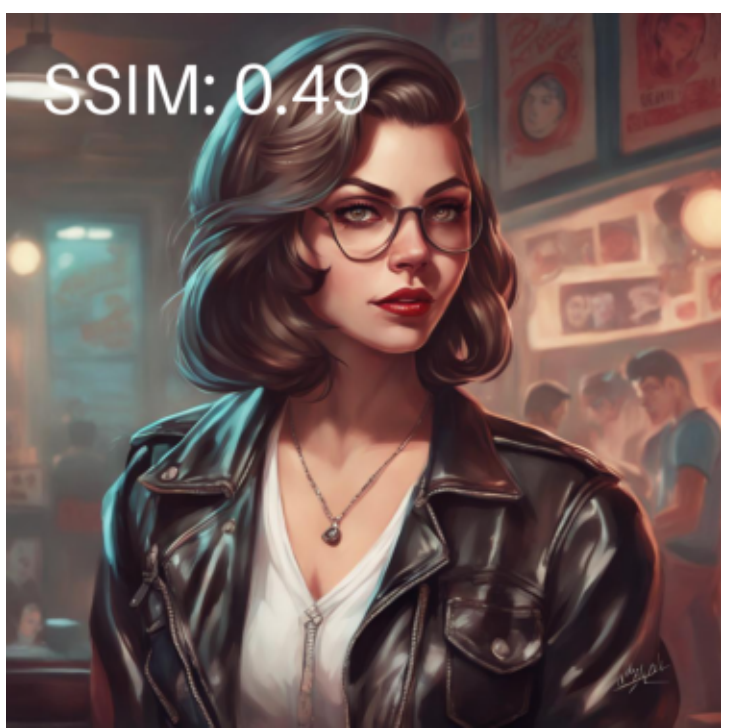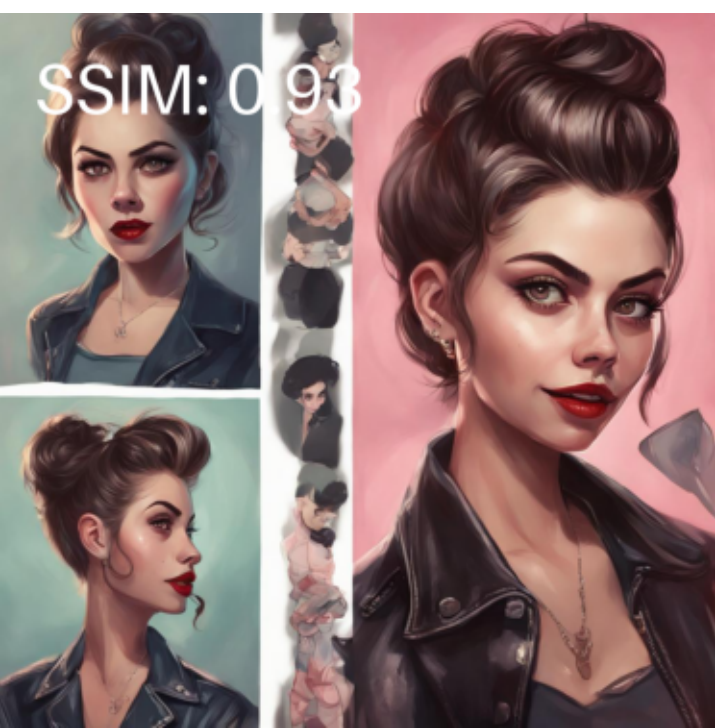

Step 200

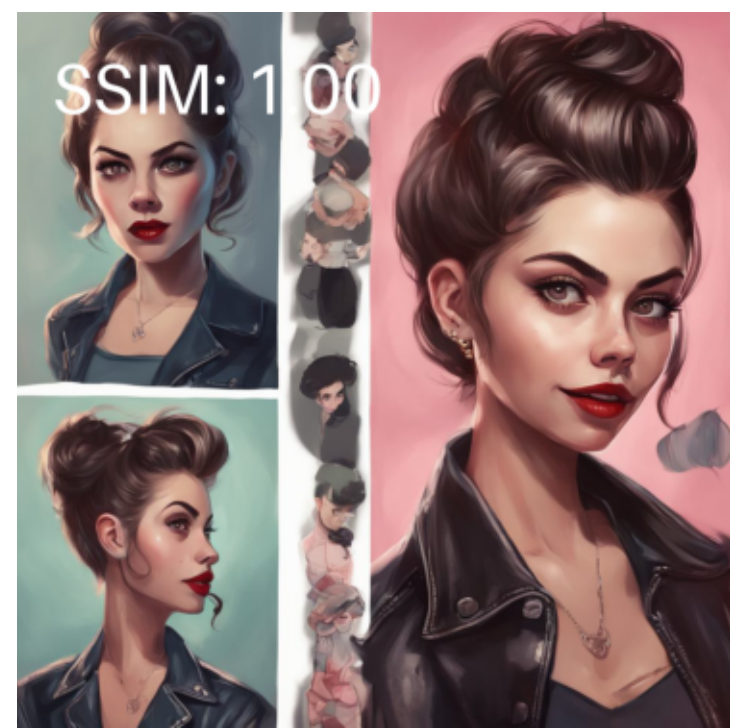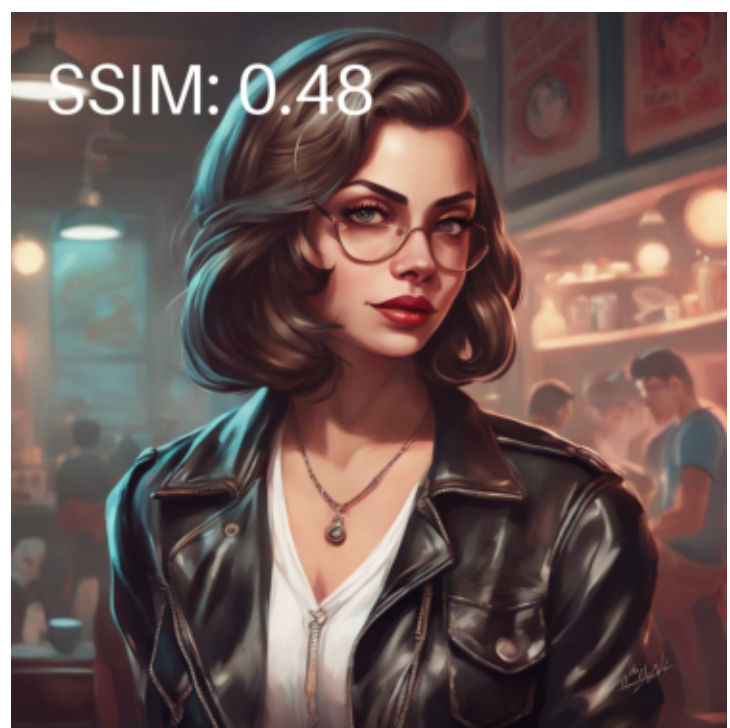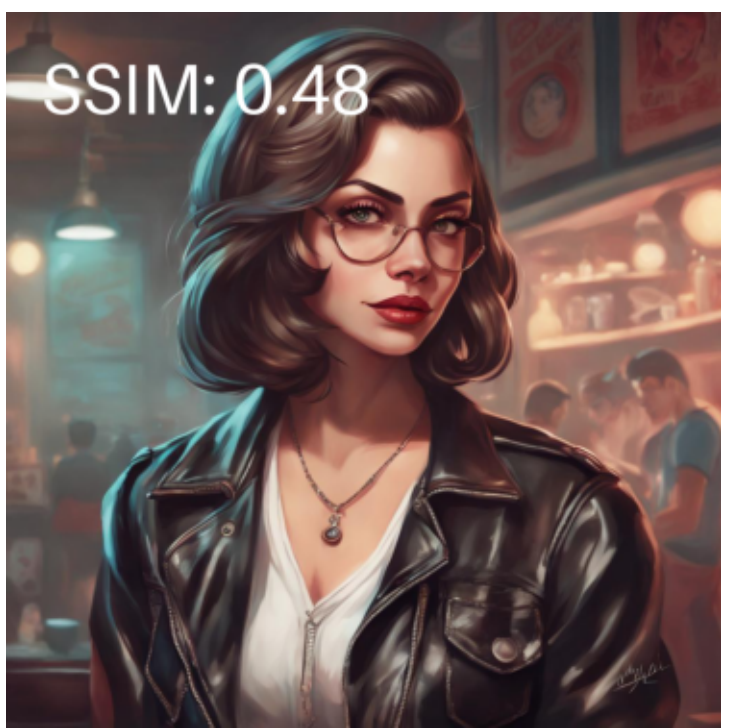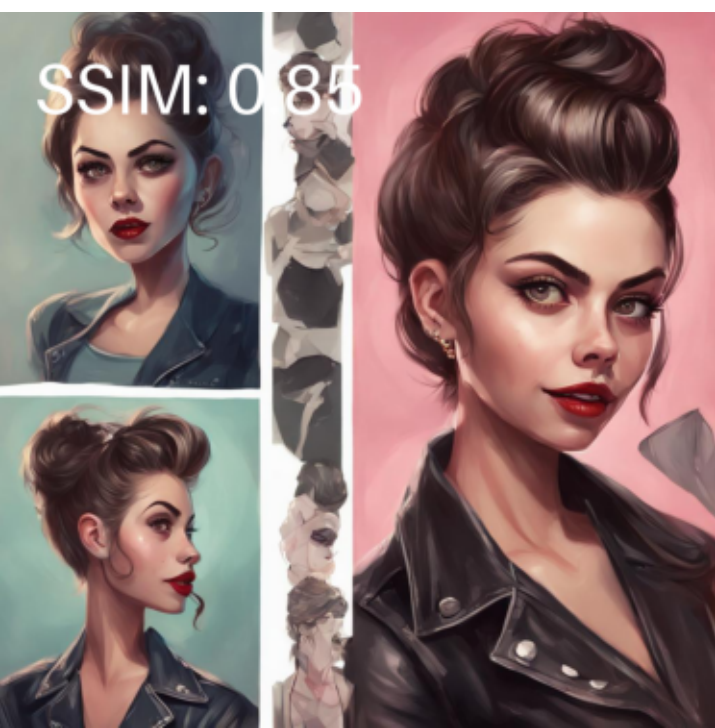



mariano rajoy with cyberpunk implants, deep focus, d & d, fantasy, intricate, elegant, highly detailed, digital painting, artstation, concept art, matte, sharp focus, illustration, hearthstone, art by artgerm and greg rutkowski and alphonse mucha

FP32

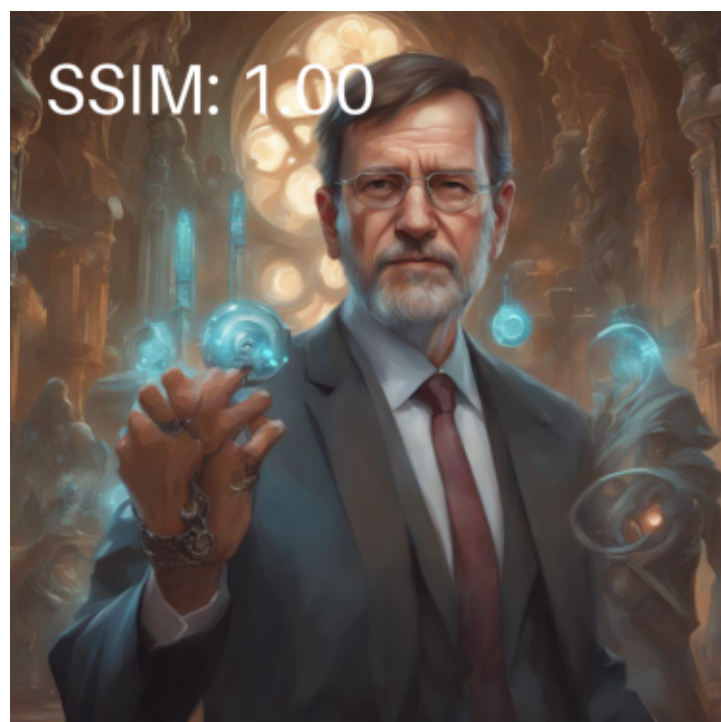

M4E3

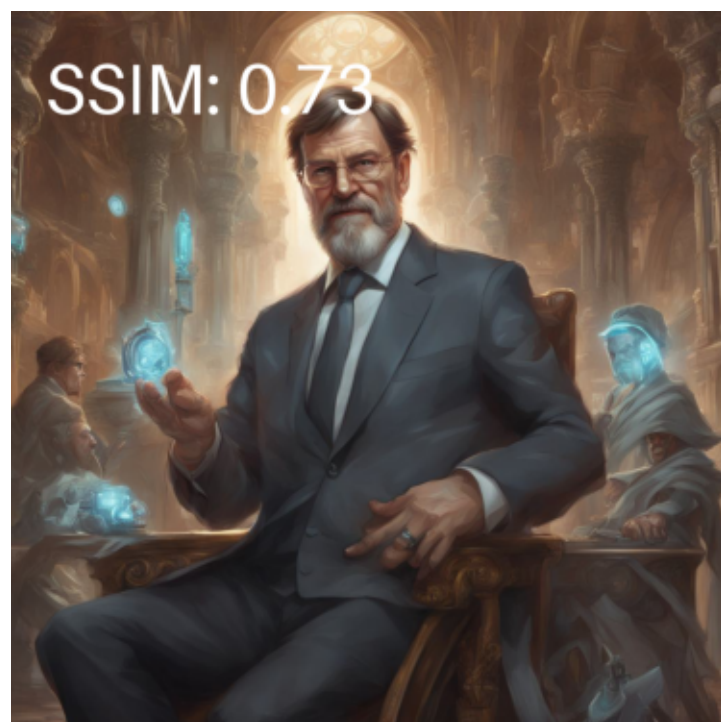

+SR

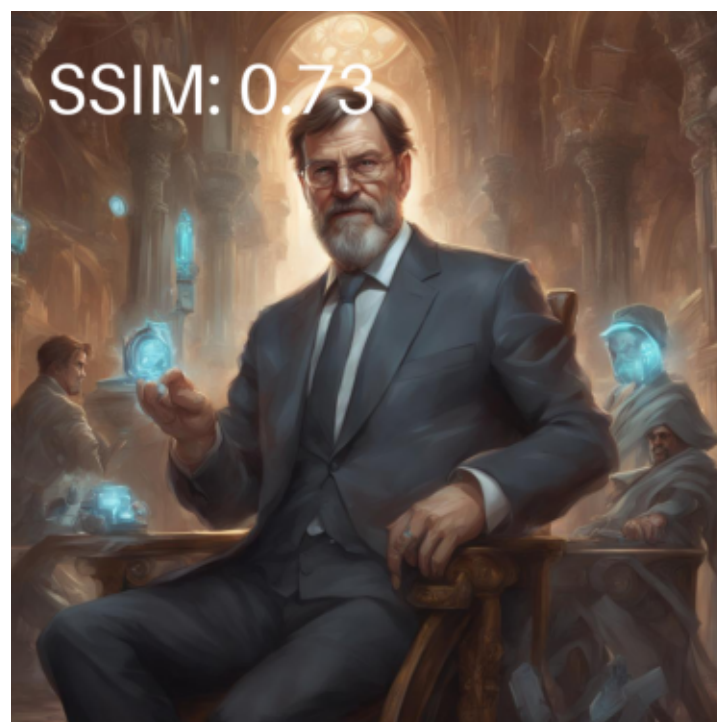

+WSR(p=4)

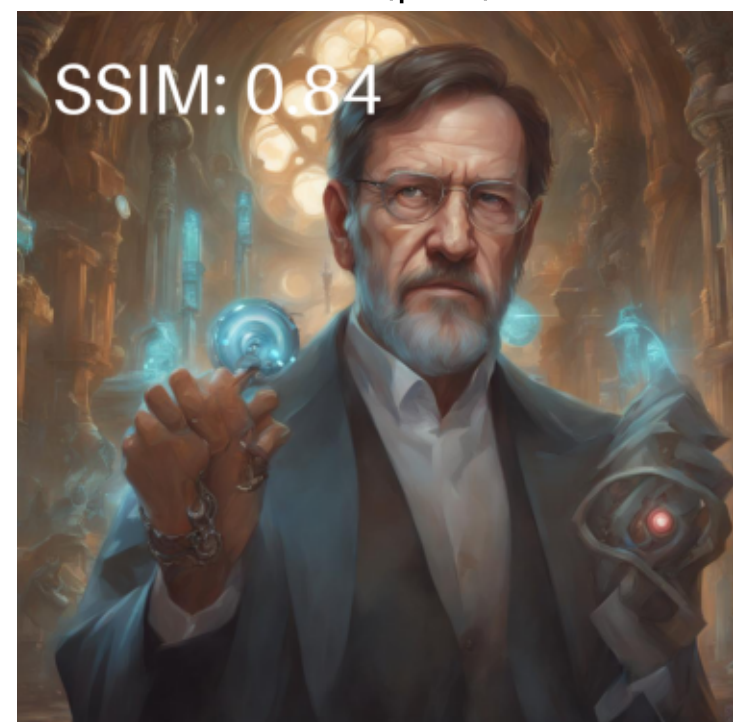

Step 40

SSIM: 1.00

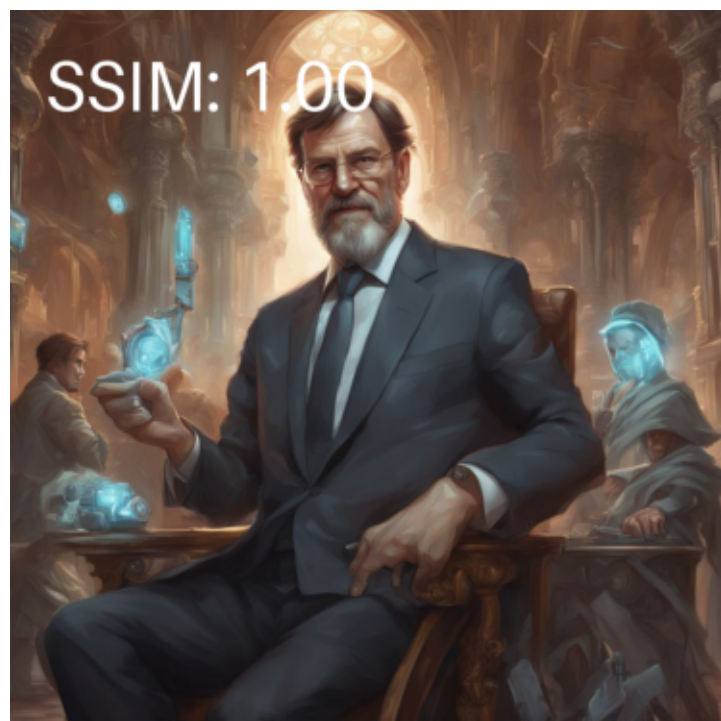

SSIM: 0.91

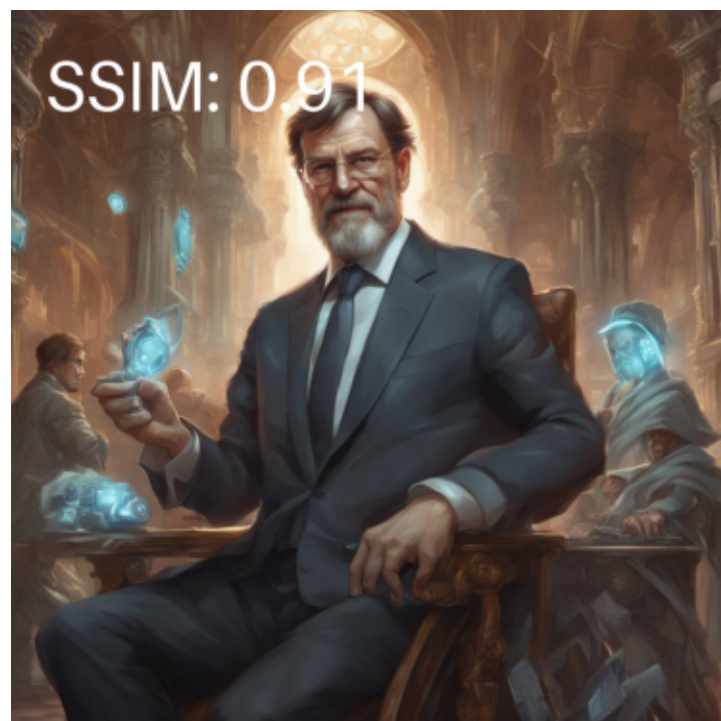

SSIM: 0.93

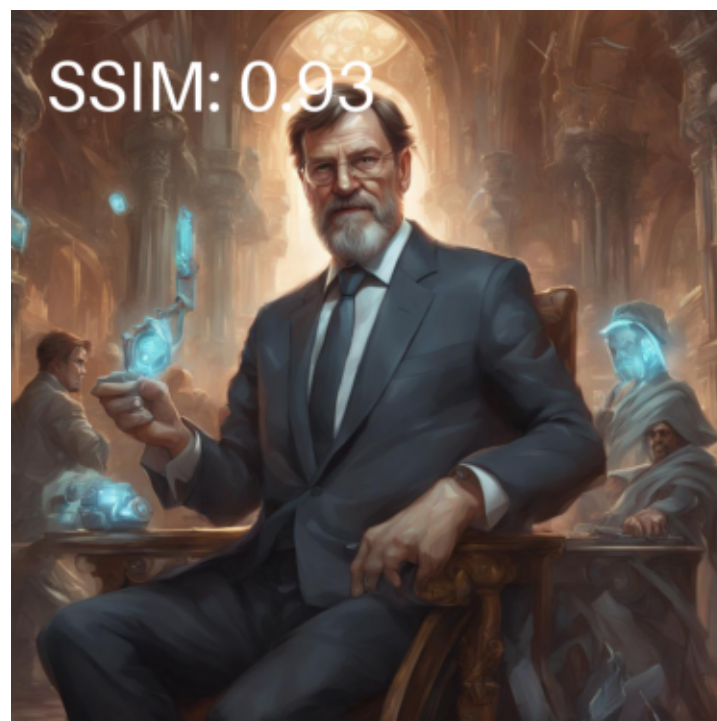

SSIM: 0.94

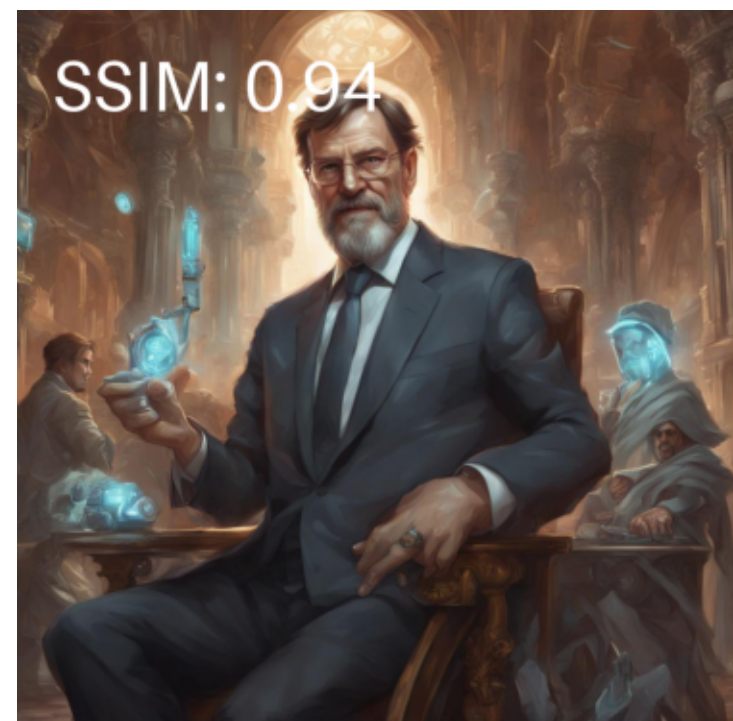

Step 100

SSIM: 1.00

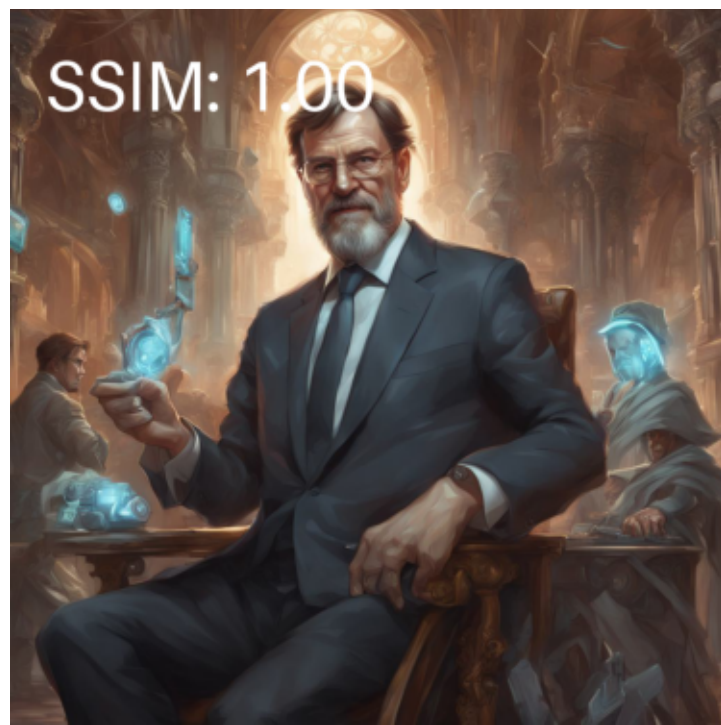

SSIM: 0.90

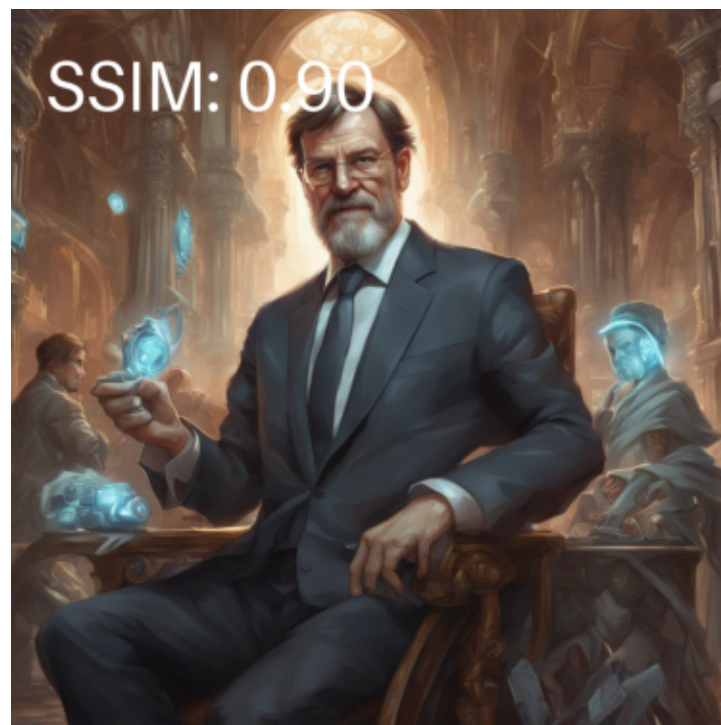

SSIM: 0.93

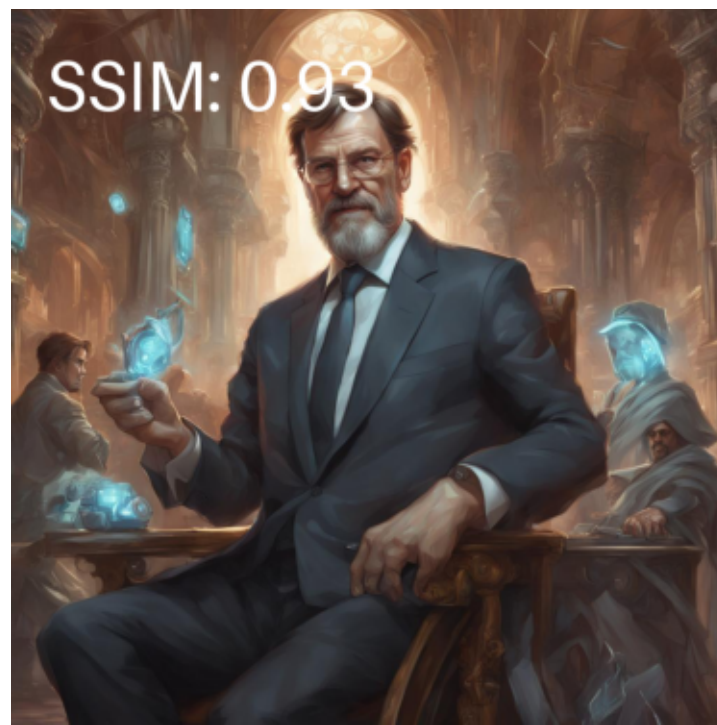

SSIM: 0.94

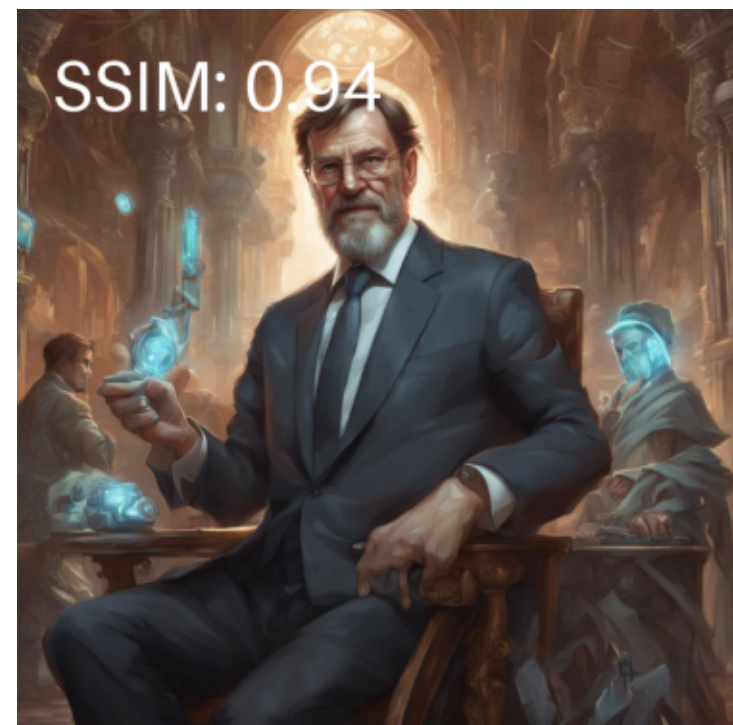

Step 200



ultra realistic illustration of taco cat, intricate, elegant, highly detailed, digital painting, artstation, concept art, smooth, sharp focus, illustration, art by artgerm and greg rutkowski and alphonse mucha

FP32

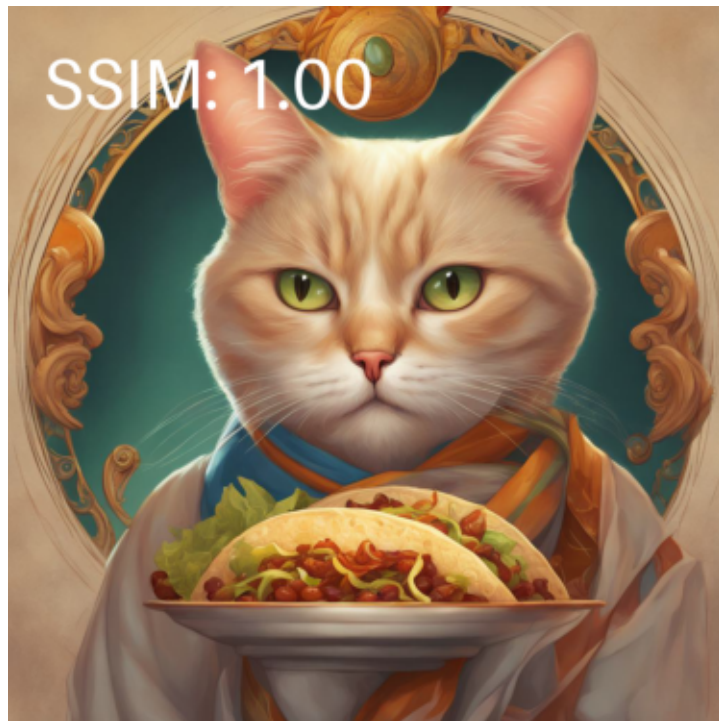

M4E3

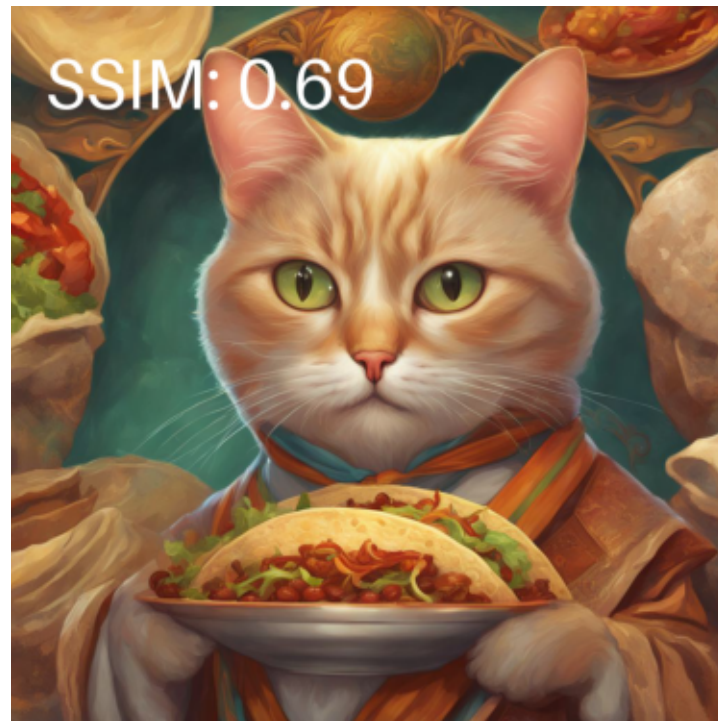

+SR

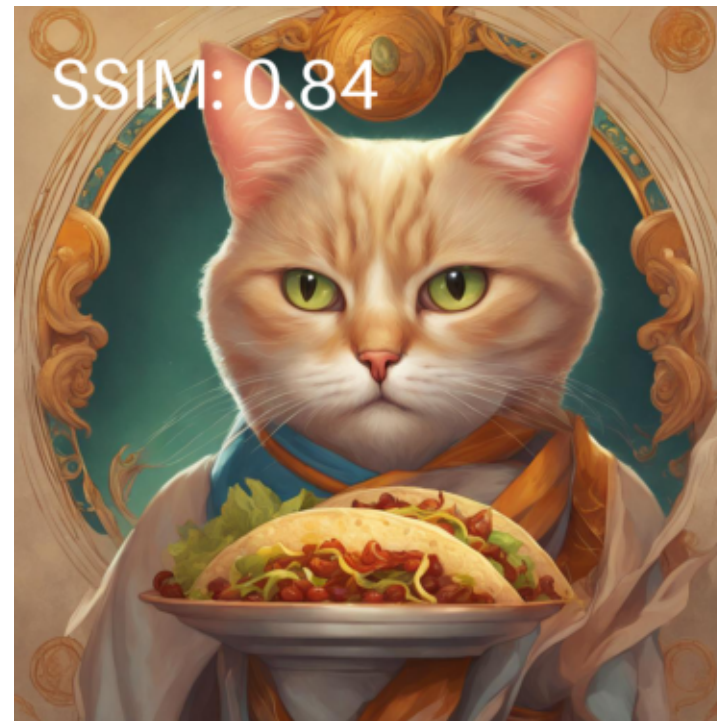

+WSR(p=4)

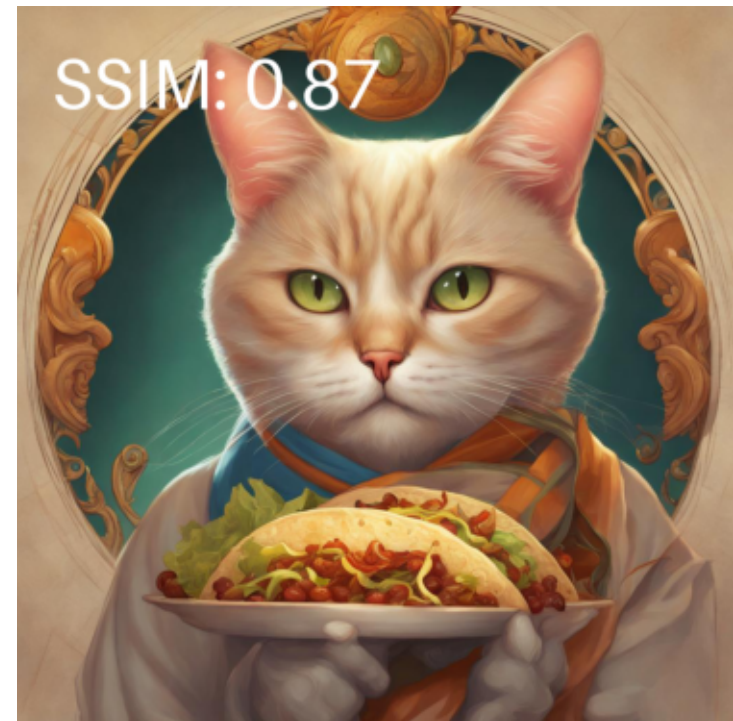

Step 40

SSIM: 1.00

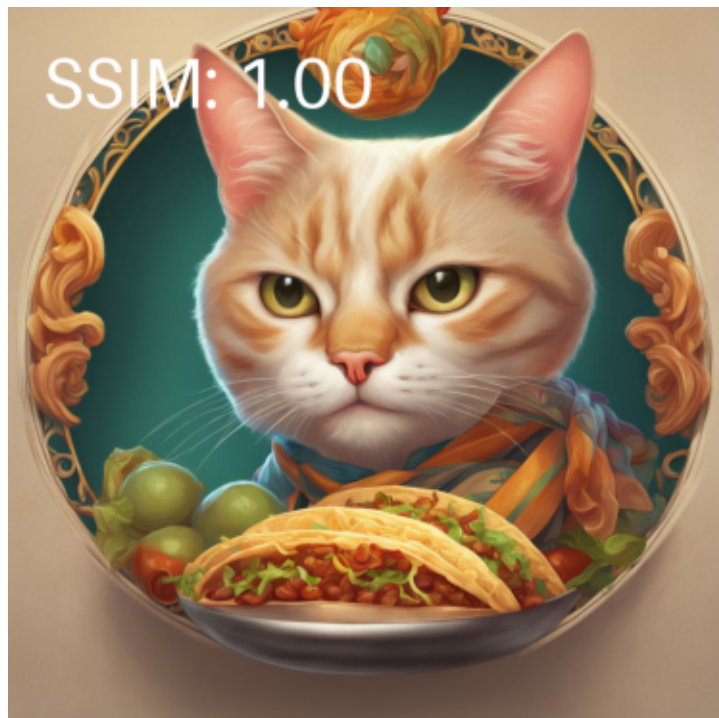

SSIM: 0.68

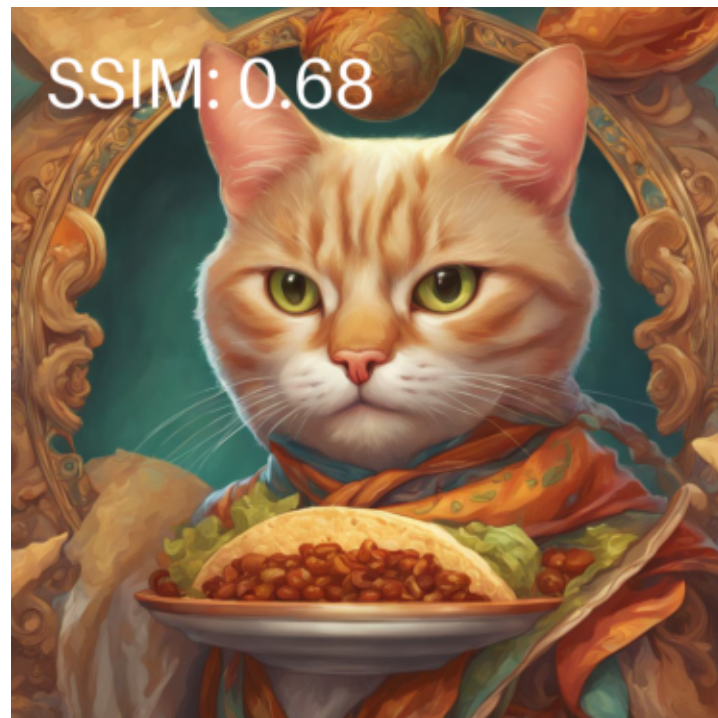

SSIM: 0.83

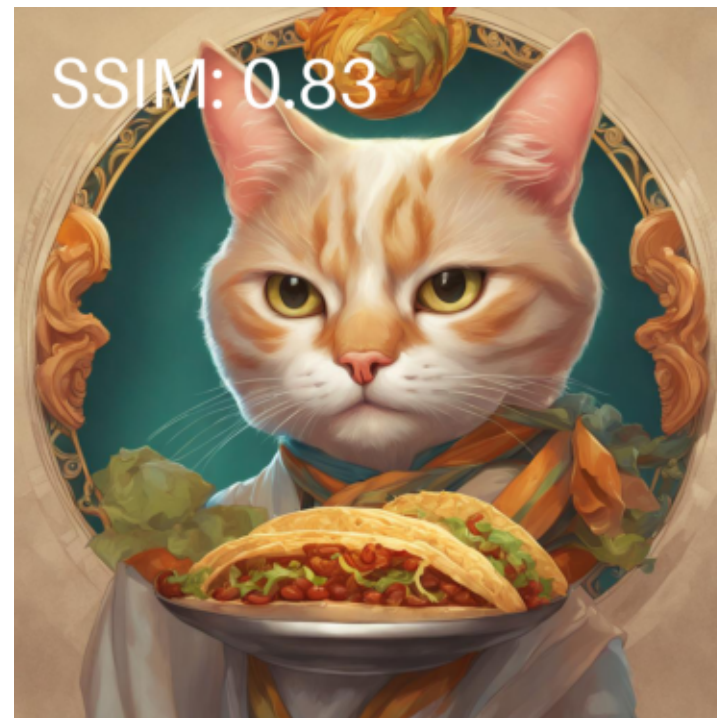

SSIM: 0.89

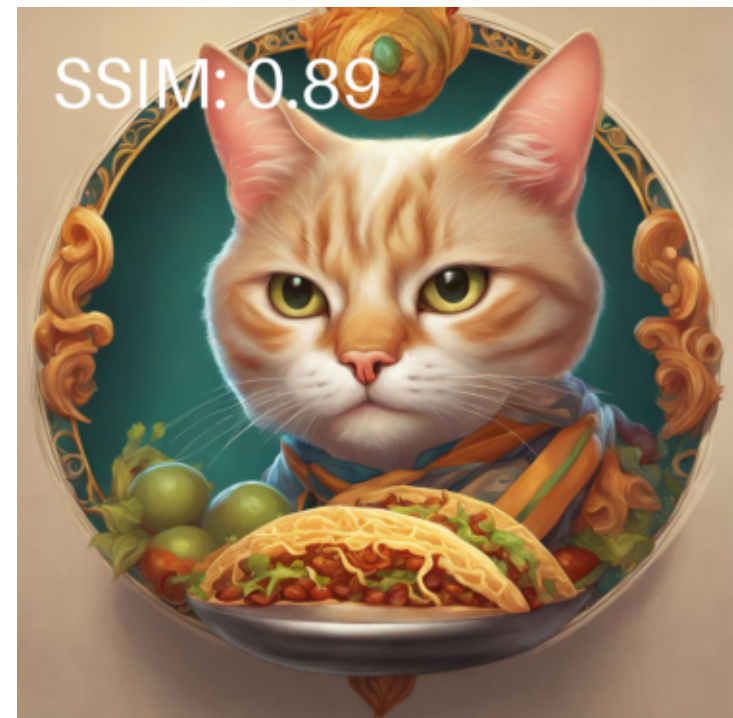

Step 100

SSIM: 1.00

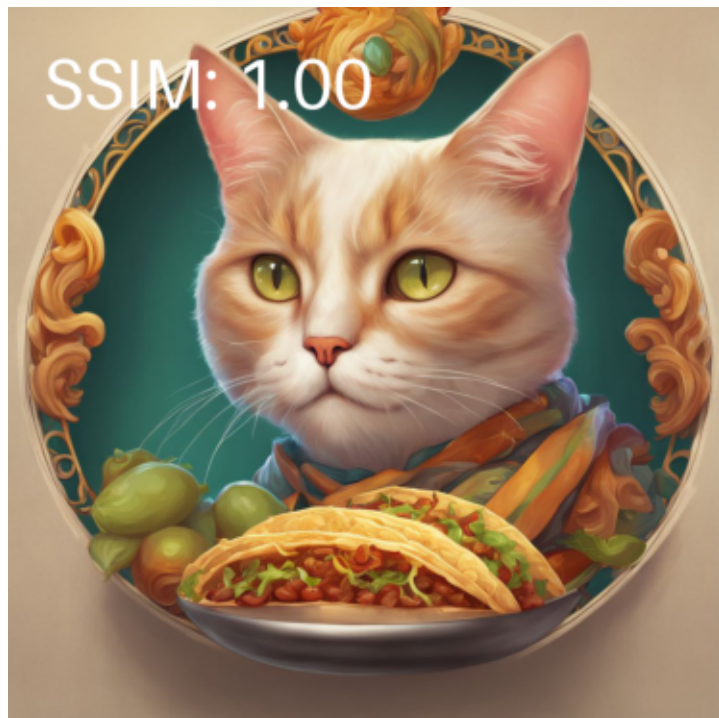

SSIM: 0.60

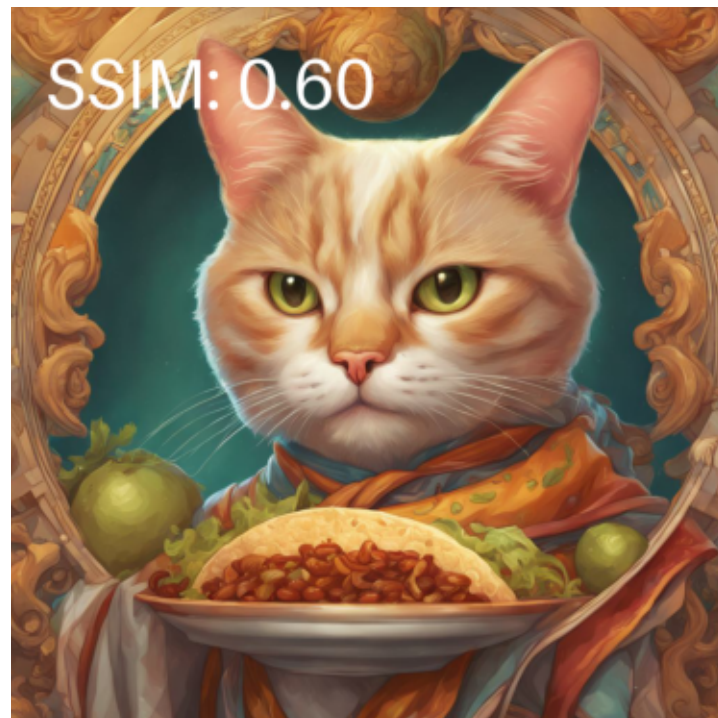

SSIM: 0.80

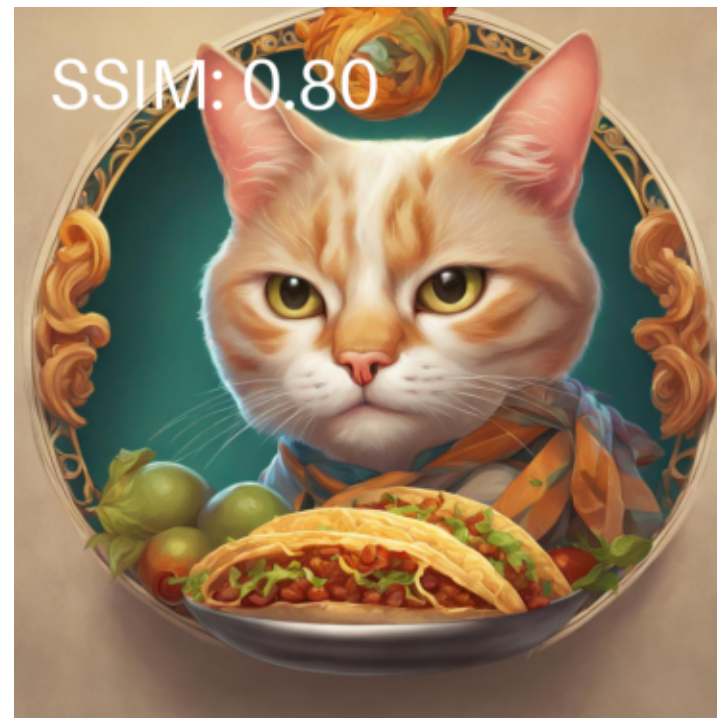

SSIM: 0.86

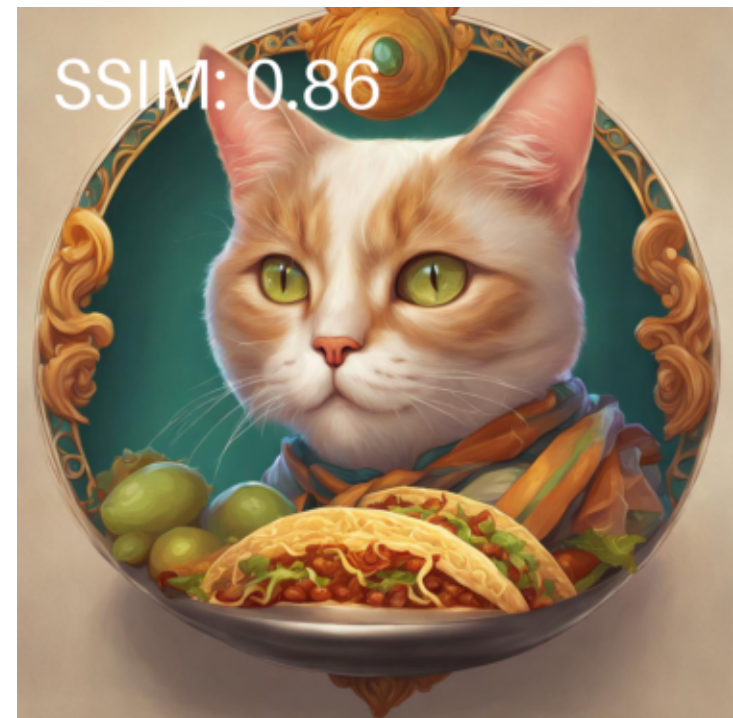

Step 200
